# Supplementary material for: Competitive binding of MatP and topoisomerase IV to the MukB hinge domain
Source: eLife. 2021 Sep 29;10:e70444. doi: 10.7554/eLife.70444 (PMC8523169; doi:10.7554/eLife.70444)
Supplement: Figure 2—source data 2. [file elife-70444-fig2-data2.xlsx]

## Sheet: raw
Chrom.1					Chrom.1				Chrom.1				Chrom.1				Chrom.1
LH					ParC CTD (with MBP)				LH + MatPdelta18C				LH + ParC CTD (with MBP)				LH + ParC CTD + MatPdelta18C
ml	mAU	normalised mAU			ml	mAU	normalised mAU		ml	mAU	normalised mAU		ml	mAU	normalised mAU		ml	mAU	normalised mAU
0	0.019357	0.0551116			0	0.081456	0.000149496		0	-0.007275	0.0225666		0	0.009937	0.00666078		0	0.042401	0.00767477
0.000832	-0.096774	0.0458413			0.000832	0.607988	0.00809965		0.000832	0.006561	0.0235896		0.000832	-0.058952	0.00561791		0.000831	0.145364	0.00941088
0.001664	-0.098009	0.0457427			0.001665	0.606885	0.008083		0.001664	0.006309	0.023571		0.001664	-0.061039	0.00558631		0.001662	0.146418	0.00942865
0.002496	-0.099176	0.0456495			0.002497	0.605166	0.00805704		0.002496	0.006562	0.0235897		0.002497	-0.062236	0.00556819		0.002494	0.146637	0.00943234
0.003329	-0.100226	0.0455657			0.00333	0.604012	0.00803962		0.003328	0.006024	0.0235499		0.003329	-0.062676	0.00556153		0.003325	0.145573	0.0094144
0.004161	-0.101277	0.0454818			0.004162	0.603999	0.00803942		0.00416	0.004952	0.0234707		0.004161	-0.063312	0.0055519		0.004156	0.143731	0.00938334
0.004993	-0.102283	0.0454015			0.004995	0.603692	0.00803479		0.004992	0.004436	0.0234325		0.004993	-0.063663	0.00554659		0.004987	0.143409	0.00937791
0.005825	-0.103721	0.0452867			0.005827	0.602684	0.00801957		0.005824	0.004672	0.02345		0.005825	-0.063374	0.00555096		0.005819	0.144661	0.00939902
0.006657	-0.105168	0.0451712			0.00666	0.602012	0.00800942		0.006656	0.004464	0.0234346		0.006658	-0.063882	0.00554327		0.00665	0.146218	0.00942527
0.007489	-0.105975	0.0451068			0.007492	0.602049	0.00800998		0.007488	0.003761	0.0233826		0.00749	-0.064042	0.00554085		0.007481	0.146793	0.00943497
0.008322	-0.107455	0.0449886			0.008325	0.602264	0.00801323		0.00832	0.003355	0.0233526		0.008322	-0.064008	0.00554137		0.008312	0.146698	0.00943337
0.009154	-0.109336	0.0448385			0.009157	0.602447	0.00801599		0.009153	0.003446	0.0233593		0.009154	-0.063675	0.00554641		0.009143	0.146045	0.00942236
0.009986	-0.11058	0.0447392			0.00999	0.602806	0.00802141		0.009985	0.002856	0.0233157		0.009987	-0.063738	0.00554545		0.009975	0.145345	0.00941055
0.010818	-0.110656	0.0447331			0.010822	0.60283	0.00802177		0.010817	0.001454	0.023212		0.010819	-0.065415	0.00552007		0.010806	0.144541	0.009397
0.01165	-0.111168	0.0446922			0.011655	0.601315	0.0079989		0.011649	0.000916	0.0231723		0.011651	-0.067185	0.00549327		0.011637	0.142987	0.0093708
0.012482	-0.111585	0.0446589			0.012487	0.60126	0.00799807		0.012481	0.000709	0.023157		0.012483	-0.068186	0.00547812		0.012468	0.141626	0.00934785
0.013315	-0.111955	0.0446294			0.01332	0.601562	0.00800263		0.013313	0.000834	0.0231662		0.013315	-0.069376	0.0054601		0.013299	0.140859	0.00933491
0.014147	-0.112749	0.044566			0.014152	0.600459	0.00798597		0.014145	0.000492	0.0231409		0.014148	-0.070856	0.0054377		0.014131	0.139816	0.00931733
0.014979	-0.113145	0.0445344			0.014985	0.59955	0.00797225		0.014977	-0.000338	0.0230795		0.01498	-0.072575	0.00541167		0.014962	0.138772	0.00929972
0.015811	-0.113259	0.0445253			0.015817	0.599234	0.00796748		0.015809	-0.000924	0.0230362		0.015812	-0.074338	0.00538499		0.015793	0.138887	0.00930166
0.016643	-0.114187	0.0444512			0.01665	0.598646	0.0079586		0.016641	-0.001614	0.0229852		0.016644	-0.074695	0.00537958		0.016624	0.139194	0.00930684
0.017475	-0.114884	0.0443956			0.017482	0.598074	0.00794996		0.017473	-0.002218	0.0229405		0.017476	-0.075302	0.00537039		0.017456	0.1394	0.00931031
0.018307	-0.11542	0.0443528			0.018315	0.599375	0.00796961		0.018305	-0.00302	0.0228812		0.018309	-0.077138	0.0053426		0.018287	0.140005	0.00932051
0.01914	-0.116027	0.0443043			0.019147	0.599471	0.00797105		0.019137	-0.003338	0.0228577		0.019141	-0.077791	0.00533271		0.019118	0.141049	0.00933812
0.019972	-0.117203	0.0442105			0.01998	0.599191	0.00796683		0.019969	-0.003167	0.0228704		0.019973	-0.077857	0.00533171		0.019949	0.141512	0.00934592
0.020804	-0.119173	0.0440532			0.020812	0.599623	0.00797335		0.020801	-0.003163	0.0228707		0.020805	-0.078583	0.00532072		0.02078	0.140874	0.00933517
0.021636	-0.119965	0.04399			0.021645	0.600659	0.00798899		0.021633	-0.003092	0.0228759		0.021638	-0.079382	0.00530863		0.021612	0.141036	0.0093379
0.022468	-0.121008	0.0439067			0.022477	0.601556	0.00800254		0.022465	-0.003054	0.0228787		0.02247	-0.080221	0.00529593		0.022443	0.140682	0.00933193
0.0233	-0.122592	0.0437803			0.02331	0.602125	0.00801113		0.023297	-0.003752	0.0228271		0.023302	-0.080074	0.00529815		0.023274	0.140062	0.00932148
0.024133	-0.123806	0.0436834			0.024142	0.602937	0.00802339		0.024129	-0.004522	0.0227702		0.024134	-0.080416	0.00529297		0.024105	0.138769	0.00929967
0.024965	-0.12452	0.0436264			0.024975	0.602632	0.00801878		0.024961	-0.004659	0.02276		0.024966	-0.081386	0.00527829		0.024936	0.138566	0.00929625
0.025797	-0.125104	0.0435798			0.025807	0.601853	0.00800702		0.025793	-0.005314	0.0227116		0.025799	-0.082985	0.00525408		0.025768	0.137085	0.00927128
0.026629	-0.123955	0.0436715			0.02664	0.601747	0.00800542		0.026625	-0.006083	0.0226548		0.026631	-0.084973	0.00522399		0.026599	0.1351	0.00923781
0.027461	-0.122939	0.0437526			0.027472	0.602083	0.00801049		0.027458	-0.00684	0.0225988		0.027463	-0.086489	0.00520104		0.02743	0.132291	0.00919045
0.028293	-0.122864	0.0437586			0.028305	0.602395	0.0080152		0.02829	-0.007892	0.022521		0.028295	-0.088125	0.00517627		0.028261	0.130828	0.00916578
0.029126	-0.122684	0.0437729			0.029137	0.602774	0.00802093		0.029122	-0.00924	0.0224213		0.029127	-0.089037	0.00516246		0.029093	0.129917	0.00915042
0.029958	-0.122229	0.0438093			0.02997	0.602443	0.00801593		0.029954	-0.0109	0.0222986		0.02996	-0.090331	0.00514288		0.029924	0.128436	0.00912544
0.03079	-0.122473	0.0437898			0.030802	0.602166	0.00801175		0.030786	-0.012113	0.0222089		0.030792	-0.091792	0.00512076		0.030755	0.126861	0.00909889
0.031622	-0.123346	0.0437201			0.031635	0.602322	0.0080141		0.031618	-0.012413	0.0221867		0.031624	-0.091819	0.00512035		0.031586	0.124797	0.00906409
0.032454	-0.123883	0.0436772			0.032467	0.603207	0.00802747		0.03245	-0.013155	0.0221319		0.032456	-0.092262	0.00511364		0.032417	0.123546	0.00904299
0.033286	-0.124458	0.0436313			0.0333	0.604085	0.00804072		0.033282	-0.01367	0.0220938		0.033289	-0.093408	0.00509629		0.033249	0.122131	0.00901913
0.034118	-0.124627	0.0436178			0.034132	0.603698	0.00803488		0.034114	-0.014427	0.0220378		0.034121	-0.093564	0.00509393		0.03408	0.120985	0.00899981
0.034951	-0.124433	0.0436333			0.034965	0.604439	0.00804607		0.034946	-0.015655	0.021947		0.034953	-0.093041	0.00510185		0.034911	0.119861	0.00898086
0.035783	-0.124509	0.0436273			0.035797	0.604015	0.00803967		0.035778	-0.01626	0.0219023		0.035785	-0.093195	0.00509952		0.035742	0.118774	0.00896253
0.036615	-0.125781	0.0435257			0.03663	0.601685	0.00800448		0.03661	-0.016919	0.0218535		0.036617	-0.093159	0.00510006		0.036573	0.117712	0.00894462
0.037447	-0.126785	0.0434456			0.037462	0.601027	0.00799455		0.037442	-0.017939	0.0217781		0.03745	-0.093547	0.00509419		0.037405	0.116939	0.00893159
0.038279	-0.127756	0.0433681			0.038295	0.600951	0.0079934		0.038274	-0.018919	0.0217057		0.038282	-0.096119	0.00505525		0.038236	0.116348	0.00892162
0.039111	-0.128776	0.0432866			0.039127	0.599268	0.00796799		0.039106	-0.019742	0.0216448		0.039114	-0.096662	0.00504703		0.039067	0.113873	0.00887989
0.039944	-0.128876	0.0432787			0.03996	0.597676	0.00794395		0.039938	-0.020904	0.0215589		0.039946	-0.097695	0.00503139		0.039898	0.111607	0.00884168
0.040776	-0.128875	0.0432787			0.040792	0.594862	0.00790146		0.04077	-0.021976	0.0214796		0.040778	-0.100597	0.00498746		0.04073	0.110151	0.00881713
0.041608	-0.128895	0.0432771			0.041625	0.589517	0.00782076		0.041602	-0.023256	0.021385		0.041611	-0.102652	0.00495635		0.041561	0.109418	0.00880477
0.04244	-0.129747	0.0432091			0.042457	0.576652	0.00762651		0.042434	-0.025763	0.0211996		0.042443	-0.106337	0.00490057		0.042392	0.107371	0.00877026
0.043272	-0.134128	0.0428594			0.04329	0.557442	0.00733645		0.043266	-0.027764	0.0210517		0.043275	-0.110189	0.00484225		0.043223	0.104018	0.00871372
0.044104	-0.140673	0.0423369			0.044122	0.53941	0.00706419		0.044098	-0.028861	0.0209706		0.044107	-0.114497	0.00477704		0.044054	0.101865	0.00867742
0.044937	-0.150475	0.0415545			0.044955	0.526076	0.00686286		0.044931	-0.028661	0.0209854		0.044939	-0.119181	0.00470613		0.044886	0.100275	0.00865061
0.045769	-0.159947	0.0407984			0.045787	0.514373	0.00668615		0.045763	-0.02996	0.0208893		0.045772	-0.122863	0.00465039		0.045717	0.099232	0.00863302
0.046601	-0.16638	0.0402848			0.04662	0.507125	0.00657671		0.046595	-0.031271	0.0207924		0.046604	-0.125601	0.00460894		0.046548	0.097999	0.00861223
0.047433	-0.171601	0.0398681			0.047452	0.502505	0.00650696		0.047427	-0.03136	0.0207858		0.047436	-0.125401	0.00461197		0.047379	0.09636	0.0085846
0.048265	-0.175969	0.0395194			0.048285	0.498524	0.00644685		0.048259	-0.03201	0.0207377		0.048268	-0.124734	0.00462206		0.04821	0.094543	0.00855396
0.049097	-0.179019	0.0392759			0.049117	0.496159	0.00641114		0.049091	-0.032581	0.0206955		0.049101	-0.124961	0.00461863		0.049042	0.092881	0.00852593
0.049929	-0.180819	0.0391322			0.04995	0.4954	0.00639968		0.049923	-0.03186	0.0207488		0.049933	-0.124967	0.00461854		0.049873	0.091831	0.00850823
0.050762	-0.181383	0.0390872			0.050782	0.495795	0.00640564		0.050755	-0.030621	0.0208404		0.050765	-0.125791	0.00460606		0.050704	0.089622	0.00847098
0.051594	-0.181924	0.039044			0.051615	0.497167	0.00642636		0.051587	-0.030388	0.0208577		0.051597	-0.127645	0.004578		0.051535	0.088677	0.00845505
0.052426	-0.181534	0.0390751			0.052447	0.49891	0.00645267		0.052419	-0.031781	0.0207547		0.052429	-0.129158	0.00455509		0.052367	0.088761	0.00845647
0.053258	-0.179933	0.0392029			0.05328	0.500933	0.00648322		0.053251	-0.032331	0.020714		0.053262	-0.129255	0.00455362		0.053198	0.089034	0.00846107
0.05409	-0.178499	0.0393174			0.054112	0.502368	0.00650489		0.054083	-0.031913	0.0207449		0.054094	-0.129044	0.00455682		0.054029	0.089211	0.00846405
0.054922	-0.177616	0.0393879			0.054945	0.50474	0.0065407		0.054915	-0.031943	0.0207427		0.054926	-0.128831	0.00456004		0.05486	0.089125	0.0084626
0.055755	-0.17773	0.0393788			0.055777	0.506484	0.00656704		0.055747	-0.031552	0.0207716		0.055758	-0.129442	0.00455079		0.055691	0.089197	0.00846382
0.056587	-0.177813	0.0393722			0.05661	0.509423	0.00661141		0.056579	-0.031324	0.0207885		0.05659	-0.130764	0.00453078		0.056523	0.089122	0.00846255
0.057419	-0.176723	0.0394592			0.057442	0.512847	0.00666311		0.057411	-0.030947	0.0208163		0.057423	-0.132151	0.00450978		0.057354	0.087967	0.00844308
0.058251	-0.174802	0.0396125			0.058275	0.514961	0.00669503		0.058243	-0.030012	0.0208855		0.058255	-0.132785	0.00450018		0.058185	0.085707	0.00840497
0.059083	-0.172978	0.0397581			0.059107	0.517423	0.0067322		0.059075	-0.029731	0.0209062		0.059087	-0.132483	0.00450476		0.059016	0.084843	0.0083904
0.059915	-0.170453	0.0399597			0.05994	0.520081	0.00677234		0.059907	-0.029542	0.0209202		0.059919	-0.132985	0.00449716		0.059847	0.085815	0.00840679
0.060748	-0.169675	0.0400218			0.060772	0.522553	0.00680966		0.060739	-0.027577	0.0210655		0.060752	-0.13352	0.00448906		0.060679	0.086284	0.0084147
0.06158	-0.169662	0.0400228			0.061605	0.526081	0.00686293		0.061571	-0.024125	0.0213207		0.061584	-0.13314	0.00449481		0.06151	0.087024	0.00842718
0.062412	-0.169206	0.0400592			0.062437	0.531965	0.00695178		0.062403	-0.023588	0.0213604		0.062416	-0.1333	0.00449239		0.062341	0.086104	0.00841166
0.063244	-0.16819	0.0401404			0.06327	0.544367	0.00713903		0.063236	-0.022898	0.0214115		0.063248	-0.132073	0.00451096		0.063172	0.086349	0.0084158
0.064076	-0.164134	0.0404641			0.064102	0.564752	0.00744683		0.064068	-0.022891	0.021412		0.06408	-0.129561	0.00454899		0.064004	0.087509	0.00843535
0.064908	-0.158027	0.0409516			0.064935	0.585043	0.00775321		0.0649	-0.022182	0.0214644		0.064913	-0.126837	0.00459023		0.064835	0.088179	0.00844665
0.06574	-0.149564	0.0416272			0.065767	0.599477	0.00797115		0.065732	-0.023698	0.0213523		0.065745	-0.124	0.00463318		0.065666	0.088302	0.00844873
0.066573	-0.140562	0.0423458			0.0666	0.611795	0.00815714		0.066564	-0.02432	0.0213063		0.066577	-0.121636	0.00466896		0.066497	0.087331	0.00843235
0.067405	-0.134289	0.0428466			0.067432	0.619366	0.00827145		0.067396	-0.024961	0.0212589		0.067409	-0.120654	0.00468383		0.067328	0.087521	0.00843556
0.068237	-0.129943	0.0431935			0.068265	0.625282	0.00836078		0.068228	-0.025729	0.0212021		0.068241	-0.122431	0.00465693		0.06816	0.087568	0.00843635
0.069069	-0.126843	0.0434409			0.069097	0.630008	0.00843214		0.06906	-0.026278	0.0211615		0.069074	-0.124947	0.00461884		0.068991	0.087919	0.00844227
0.069901	-0.124903	0.0435958			0.06993	0.632628	0.0084717		0.069892	-0.024961	0.0212589		0.069906	-0.126289	0.00459852		0.069822	0.088132	0.00844586
0.070733	-0.124064	0.0436628			0.070762	0.633651	0.00848714		0.070724	-0.024923	0.0212617		0.070738	-0.128231	0.00456912		0.070653	0.08769	0.00843841
0.071566	-0.124899	0.0435961			0.071595	0.635188	0.00851035		0.071556	-0.025795	0.0211973		0.07157	-0.130013	0.00454215		0.071485	0.088753	0.00845633
0.072398	-0.125494	0.0435486			0.072427	0.63518	0.00851023		0.072388	-0.026514	0.0211441		0.072403	-0.131089	0.00452586		0.072316	0.089255	0.00846479
0.07323	-0.126776	0.0434463			0.07326	0.634406	0.00849854		0.07322	-0.026209	0.0211667		0.073235	-0.132162	0.00450962		0.073147	0.088974	0.00846006
0.074062	-0.128841	0.0432815			0.074092	0.634588	0.00850129		0.074052	-0.026919	0.0211142		0.074067	-0.134254	0.00447795		0.073978	0.088448	0.00845119
0.074894	-0.131578	0.043063			0.074925	0.634382	0.00849818		0.074884	-0.027813	0.0210481		0.074899	-0.135794	0.00445463		0.074809	0.087789	0.00844008
0.075726	-0.133717	0.0428922			0.075757	0.633384	0.00848311		0.075716	-0.027446	0.0210752		0.075731	-0.137587	0.00442749		0.075641	0.087074	0.00842802
0.076559	-0.134161	0.0428568			0.07659	0.632903	0.00847585		0.076548	-0.027904	0.0210413		0.076564	-0.139411	0.00439988		0.076472	0.085663	0.00840423
0.077391	-0.133867	0.0428802			0.077422	0.631805	0.00845927		0.07738	-0.028687	0.0209834		0.077396	-0.140138	0.00438887		0.077303	0.085001	0.00839307
0.078223	-0.134882	0.0427992			0.078255	0.631677	0.00845734		0.078212	-0.029715	0.0209074		0.078228	-0.141076	0.00437467		0.078134	0.083386	0.00836583
0.079055	-0.136393	0.0426786			0.079087	0.63125	0.00845089		0.079044	-0.030613	0.020841		0.07906	-0.143191	0.00434265		0.078965	0.083574	0.008369
0.079887	-0.137479	0.0425919			0.07992	0.630154	0.00843434		0.079876	-0.030819	0.0208258		0.079892	-0.144992	0.00431539		0.079797	0.082394	0.00834911
0.080719	-0.139277	0.0424484			0.080752	0.627928	0.00840073		0.080708	-0.030994	0.0208129		0.080725	-0.145984	0.00430037		0.080628	0.081204	0.00832904
0.081551	-0.141176	0.0422968			0.081585	0.628047	0.00840253		0.081541	-0.03308	0.0206586		0.081557	-0.146314	0.00429537		0.081459	0.080013	0.00830896
0.082384	-0.142142	0.0422197			0.082417	0.627507	0.00839437		0.082373	-0.037837	0.0203069		0.082389	-0.14696	0.0042856		0.08229	0.079182	0.00829495
0.083216	-0.143312	0.0421263			0.08325	0.627283	0.00839099		0.083205	-0.039609	0.0201759		0.083221	-0.147159	0.00428258		0.083122	0.078935	0.00829078
0.084048	-0.14549	0.0419524			0.084082	0.627171	0.0083893		0.084037	-0.039142	0.0202104		0.084054	-0.147518	0.00427715		0.083953	0.078089	0.00827652
0.08488	-0.147188	0.0418169			0.084915	0.627117	0.00838848		0.084869	-0.038254	0.0202761		0.084886	-0.14784	0.00427227		0.084784	0.07809	0.00827654
0.085712	-0.146678	0.0418576			0.085747	0.62485	0.00835425		0.085701	-0.039276	0.0202005		0.085718	-0.14862	0.00426047		0.085615	0.078075	0.00827628
0.086544	-0.14583	0.0419253			0.08658	0.624014	0.00834163		0.086533	-0.038738	0.0202403		0.08655	-0.150079	0.00423838		0.086446	0.07761	0.00826844
0.087377	-0.146076	0.0419056			0.087412	0.624792	0.00835338		0.087365	-0.037603	0.0203242		0.087382	-0.152234	0.00420575		0.087278	0.077245	0.00826229
0.088209	-0.147392	0.0418006			0.088245	0.626066	0.00837262		0.088197	-0.036161	0.0204308		0.088215	-0.152889	0.00419584		0.088109	0.076624	0.00825182
0.089041	-0.148247	0.0417323			0.089077	0.625184	0.0083593		0.089029	-0.035555	0.0204756		0.089047	-0.153471	0.00418703		0.08894	0.07598	0.00824096
0.089873	-0.148427	0.041718			0.08991	0.624464	0.00834843		0.089861	-0.036121	0.0204338		0.089879	-0.153917	0.00418028		0.089771	0.075968	0.00824076
0.090705	-0.149112	0.0416633			0.090742	0.623785	0.00833817		0.090693	-0.036714	0.0203899		0.090711	-0.155328	0.00415892		0.090602	0.07582	0.00823826
0.091537	-0.149914	0.0415993			0.091575	0.623365	0.00833183		0.091525	-0.037996	0.0202951		0.091543	-0.156487	0.00414137		0.091434	0.075652	0.00823543
0.09237	-0.15091	0.0415198			0.092407	0.621704	0.00830675		0.092357	-0.038947	0.0202248		0.092376	-0.156953	0.00413432		0.092265	0.07518	0.00822747
0.093202	-0.151573	0.0414668			0.09324	0.62042	0.00828737		0.093189	-0.0389	0.0202283		0.093208	-0.156565	0.00414019		0.093096	0.073541	0.00819983
0.094034	-0.151823	0.0414469			0.094072	0.619377	0.00827162		0.094021	-0.038985	0.020222		0.09404	-0.1567	0.00413815		0.093927	0.072846	0.00818812
0.094866	-0.152829	0.0413666			0.094905	0.616901	0.00823423		0.094853	-0.038766	0.0202382		0.094872	-0.157161	0.00413117		0.094759	0.072215	0.00817748
0.095698	-0.152467	0.0413955			0.095737	0.615517	0.00821333		0.095685	-0.038338	0.0202698		0.095704	-0.157251	0.0041298		0.09559	0.071052	0.00815787
0.09653	-0.152503	0.0413926			0.09657	0.613172	0.00817793		0.096517	-0.040492	0.0201106		0.096537	-0.158179	0.00411576		0.096421	0.07108	0.00815834
0.097363	-0.153522	0.0413112			0.097402	0.611153	0.00814744		0.097349	-0.041529	0.0200339		0.097369	-0.157523	0.00412569		0.097252	0.071506	0.00816552
0.098195	-0.155504	0.041153			0.098235	0.610008	0.00813015		0.098181	-0.041531	0.0200338		0.098201	-0.157488	0.00412622		0.098083	0.072108	0.00817567
0.099027	-0.156917	0.0410402			0.099067	0.607699	0.00809529		0.099014	-0.041131	0.0200633		0.099033	-0.158525	0.00411052		0.098915	0.072707	0.00818577
0.099859	-0.157801	0.0409697			0.0999	0.605814	0.00806683		0.099846	-0.040931	0.0200781		0.099866	-0.158725	0.00410749		0.099746	0.072869	0.0081885
0.100691	-0.15869	0.0408987			0.100732	0.604742	0.00805064		0.100678	-0.041722	0.0200196		0.100698	-0.15826	0.00411453		0.100577	0.074675	0.00821895
0.101523	-0.158672	0.0409001			0.101565	0.603537	0.00803245		0.10151	-0.041203	0.020058		0.10153	-0.15918	0.0041006		0.101408	0.074337	0.00821326
0.102355	-0.158679	0.0408996			0.102397	0.601915	0.00800796		0.102342	-0.04079	0.0200885		0.102362	-0.160736	0.00407705		0.102239	0.07526	0.00822882
0.103188	-0.159688	0.040819			0.10323	0.600852	0.00799191		0.103174	-0.039579	0.0201781		0.103194	-0.161699	0.00406247		0.103071	0.075299	0.00822948
0.10402	-0.160421	0.0407605			0.104062	0.599178	0.00796663		0.104006	-0.03831	0.0202719		0.104027	-0.162177	0.00405523		0.103902	0.076375	0.00824762
0.104852	-0.160405	0.0407618			0.104895	0.597527	0.0079417		0.104838	-0.038751	0.0202393		0.104859	-0.162311	0.0040532		0.104733	0.076431	0.00824856
0.105684	-0.160394	0.0407627			0.105727	0.595442	0.00791022		0.10567	-0.039064	0.0202162		0.105691	-0.163686	0.00403239		0.105564	0.077278	0.00826285
0.106516	-0.160897	0.0407225			0.10656	0.594792	0.00790041		0.106502	-0.037982	0.0202962		0.106523	-0.164627	0.00401814		0.106396	0.077563	0.00826765
0.107348	-0.16157	0.0406688			0.107392	0.593239	0.00787696		0.107334	-0.038098	0.0202876		0.107355	-0.164283	0.00402335		0.107227	0.078806	0.00828861
0.108181	-0.162738	0.0405756			0.108225	0.590412	0.00783427		0.108166	-0.037614	0.0203234		0.108188	-0.163506	0.00403511		0.108058	0.080193	0.008312
0.109013	-0.16288	0.0405642			0.109057	0.587569	0.00779135		0.108998	-0.037735	0.0203144		0.10902	-0.163555	0.00403437		0.108889	0.080285	0.00831355
0.109845	-0.163556	0.0405103			0.10989	0.585771	0.0077642		0.10983	-0.037709	0.0203163		0.109852	-0.163961	0.00402823		0.10972	0.080161	0.00831146
0.110677	-0.16557	0.0403495			0.110722	0.584367	0.007743		0.110662	-0.036559	0.0204014		0.110684	-0.165097	0.00401103		0.110552	0.079953	0.00830795
0.111509	-0.166967	0.040238			0.111555	0.582532	0.00771529		0.111494	-0.036155	0.0204312		0.111517	-0.165405	0.00400637		0.111383	0.080531	0.0083177
0.112341	-0.168194	0.04014			0.112387	0.580132	0.00767905		0.112326	-0.034388	0.0205619		0.112349	-0.166254	0.00399351		0.112214	0.079965	0.00830815
0.113174	-0.167675	0.0401815			0.11322	0.57825	0.00765064		0.113158	-0.032887	0.0206729		0.113181	-0.167156	0.00397986		0.113045	0.080017	0.00830903
0.114006	-0.168093	0.0401481			0.114052	0.576821	0.00762906		0.11399	-0.03321	0.020649		0.114013	-0.167315	0.00397745		0.113876	0.082405	0.00834929
0.114838	-0.168985	0.0400769			0.114885	0.575014	0.00760178		0.114822	-0.033024	0.0206628		0.114845	-0.167661	0.00397221		0.114708	0.083491	0.00836761
0.11567	-0.169758	0.0400152			0.115717	0.574049	0.00758721		0.115654	-0.032281	0.0207177		0.115678	-0.167536	0.00397411		0.115539	0.085135	0.00839533
0.116502	-0.170908	0.0399234			0.11655	0.573285	0.00757567		0.116486	-0.03131	0.0207895		0.11651	-0.168254	0.00396324		0.11637	0.086867	0.00842453
0.117334	-0.171333	0.0398895			0.117382	0.572853	0.00756915		0.117319	-0.029249	0.0209419		0.117342	-0.169092	0.00395055		0.117201	0.087356	0.00843277
0.118166	-0.17258	0.0397899			0.118215	0.571908	0.00755488		0.118151	-0.028431	0.0210024		0.118174	-0.170679	0.00392652		0.118033	0.086866	0.00842451
0.118999	-0.174132	0.039666			0.119047	0.569297	0.00751545		0.118983	-0.027678	0.021058		0.119006	-0.172916	0.00389266		0.118864	0.086594	0.00841993
0.119831	-0.17541	0.039564			0.11988	0.568628	0.00750535		0.119815	-0.027323	0.0210843		0.119839	-0.173279	0.00388716		0.119695	0.087066	0.00842789
0.120663	-0.176166	0.0395037			0.120712	0.567703	0.00749139		0.120647	-0.027328	0.0210839		0.120671	-0.173063	0.00389043		0.120526	0.087263	0.00843121
0.121495	-0.177696	0.0393815			0.121545	0.565701	0.00746116		0.121479	-0.026919	0.0211142		0.121503	-0.173354	0.00388603		0.121357	0.086969	0.00842625
0.122327	-0.180096	0.0391899			0.122377	0.564821	0.00744787		0.122311	-0.027277	0.0210877		0.122335	-0.174066	0.00387525		0.122189	0.088441	0.00845107
0.123159	-0.181481	0.0390794			0.12321	0.563407	0.00742652		0.123143	-0.026773	0.0211249		0.123168	-0.175055	0.00386028		0.12302	0.088148	0.00844613
0.123992	-0.181859	0.0390492			0.124042	0.561176	0.00739283		0.123975	-0.027461	0.0210741		0.124	-0.175952	0.0038467		0.123851	0.087744	0.00843932
0.124824	-0.182598	0.0389902			0.124875	0.558469	0.00735196		0.124807	-0.027159	0.0210964		0.124832	-0.178367	0.00381014		0.124682	0.087472	0.00843473
0.125656	-0.184119	0.0388688			0.125707	0.556474	0.00732184		0.125639	-0.026089	0.0211755		0.125664	-0.18007	0.00378436		0.125513	0.087788	0.00844006
0.126488	-0.185456	0.0387621			0.12654	0.555616	0.00730888		0.126471	-0.026086	0.0211757		0.126496	-0.180455	0.00377853		0.126345	0.087698	0.00843854
0.12732	-0.187152	0.0386267			0.127372	0.555337	0.00730467		0.127303	-0.027484	0.0210724		0.127329	-0.180989	0.00377045		0.127176	0.087137	0.00842908
0.128152	-0.18842	0.0385255			0.128205	0.554192	0.00728738		0.128135	-0.027402	0.0210784		0.128161	-0.182227	0.00375171		0.128007	0.088431	0.0084509
0.128985	-0.188322	0.0385333			0.129037	0.552961	0.0072688		0.128967	-0.02742	0.0210771		0.128993	-0.183556	0.00373159		0.128838	0.087962	0.00844299
0.129817	-0.188419	0.0385255			0.12987	0.551904	0.00725284		0.129799	-0.027676	0.0210582		0.129825	-0.184496	0.00371736		0.12967	0.087812	0.00844046
0.130649	-0.189699	0.0384234			0.130702	0.551647	0.00724896		0.130631	-0.027505	0.0210708		0.130657	-0.185048	0.003709		0.130501	0.088786	0.00845689
0.131481	-0.18982	0.0384137			0.131535	0.55103	0.00723964		0.131463	-0.027616	0.0210626		0.13149	-0.18558	0.00370095		0.131332	0.090103	0.00847909
0.132313	-0.188965	0.038482			0.132367	0.5499	0.00722258		0.132295	-0.027982	0.0210356		0.132322	-0.186187	0.00369176		0.132163	0.090275	0.00848199
0.133145	-0.188681	0.0385046			0.1332	0.549451	0.0072158		0.133127	-0.029304	0.0209378		0.133154	-0.186258	0.00369068		0.132994	0.090471	0.0084853
0.133977	-0.190045	0.0383957			0.134032	0.549774	0.00722067		0.133959	-0.030332	0.0208618		0.133986	-0.18656	0.00368611		0.133826	0.090589	0.00848729
0.13481	-0.191118	0.0383101			0.134865	0.548852	0.00720675		0.134792	-0.030611	0.0208412		0.134818	-0.188094	0.00366289		0.134657	0.090131	0.00847957
0.135642	-0.19092	0.0383259			0.135697	0.548209	0.00719704		0.135624	-0.029901	0.0208937		0.135651	-0.188485	0.00365697		0.135488	0.090545	0.00848655
0.136474	-0.191297	0.0382958			0.13653	0.547239	0.0071824		0.136456	-0.02992	0.0208923		0.136483	-0.188629	0.00365479		0.136319	0.08997	0.00847685
0.137306	-0.192085	0.0382329			0.137362	0.545482	0.00715587		0.137288	-0.030044	0.0208831		0.137315	-0.188737	0.00365315		0.137151	0.089052	0.00846137
0.138138	-0.192535	0.038197			0.138195	0.545261	0.00715253		0.13812	-0.030073	0.0208809		0.138147	-0.189084	0.0036479		0.137982	0.088659	0.00845475
0.13897	-0.191787	0.0382567			0.139027	0.546617	0.00717301		0.138952	-0.029414	0.0209297		0.13898	-0.189531	0.00364113		0.138813	0.089886	0.00847543
0.139803	-0.189915	0.0384061			0.13986	0.548215	0.00719714		0.139784	-0.029307	0.0209376		0.139812	-0.189122	0.00364732		0.139644	0.089581	0.00847029
0.140635	-0.188604	0.0385108			0.140692	0.547782	0.0071906		0.140616	-0.029211	0.0209447		0.140644	-0.189203	0.0036461		0.140475	0.090159	0.00848004
0.141467	-0.187858	0.0385703			0.141525	0.548346	0.00719911		0.141448	-0.029112	0.020952		0.141476	-0.19029	0.00362964		0.141307	0.090317	0.0084827
0.142299	-0.187306	0.0386144			0.142357	0.549268	0.00721303		0.14228	-0.028446	0.0210012		0.142308	-0.190936	0.00361986		0.142138	0.090388	0.0084839
0.143131	-0.18664	0.0386675			0.14319	0.550103	0.00722564		0.143112	-0.026906	0.0211151		0.143141	-0.190748	0.00362271		0.142969	0.090851	0.00849171
0.143963	-0.185624	0.0387487			0.144022	0.551023	0.00723953		0.143944	-0.026774	0.0211249		0.143973	-0.189315	0.0036444		0.1438	0.091122	0.00849628
0.144796	-0.184761	0.0388175			0.144855	0.551701	0.00724977		0.144776	-0.025251	0.0212375		0.144805	-0.188506	0.00365665		0.144631	0.091922	0.00850976
0.145628	-0.183128	0.0389479			0.145687	0.553518	0.00727721		0.145608	-0.024567	0.0212881		0.145637	-0.187354	0.00367409		0.145463	0.091898	0.00850936
0.14646	-0.180768	0.0391363			0.14652	0.555788	0.00731148		0.14644	-0.023141	0.0213935		0.146469	-0.186661	0.00368458		0.146294	0.092489	0.00851932
0.147292	-0.178558	0.0393127			0.147352	0.556258	0.00731858		0.147272	-0.0232	0.0213891		0.147302	-0.186698	0.00368402		0.147125	0.092615	0.00852145
0.148124	-0.176848	0.0394492			0.148185	0.55713	0.00733174		0.148104	-0.022394	0.0214487		0.148134	-0.186384	0.00368877		0.147956	0.093865	0.00854253
0.148956	-0.175482	0.0395583			0.149017	0.558801	0.00735697		0.148936	-0.020318	0.0216022		0.148966	-0.187005	0.00367937		0.148788	0.092381	0.0085175
0.149788	-0.173937	0.0396816			0.14985	0.559491	0.00736739		0.149768	-0.019328	0.0216754		0.149798	-0.185977	0.00369494		0.149619	0.093513	0.00853659
0.150621	-0.172678	0.0397821			0.150682	0.561723	0.00740109		0.1506	-0.017543	0.0218074		0.150631	-0.184365	0.00371934		0.15045	0.095114	0.00856359
0.151453	-0.168617	0.0401063			0.151515	0.564288	0.00743982		0.151432	-0.015791	0.021937		0.151463	-0.182951	0.00374074		0.151281	0.095296	0.00856666
0.152285	-0.165858	0.0403265			0.152347	0.567606	0.00748992		0.152264	-0.014619	0.0220236		0.152295	-0.181012	0.0037701		0.152112	0.095087	0.00856313
0.153117	-0.164389	0.0404438			0.15318	0.569823	0.0075234		0.153097	-0.013185	0.0221296		0.153127	-0.179057	0.00379969		0.152944	0.096513	0.00858718
0.153949	-0.16341	0.0405219			0.154012	0.571913	0.00755495		0.153929	-0.011326	0.0222671		0.153959	-0.17699	0.00383099		0.153775	0.09887	0.00862692
0.154781	-0.159258	0.0408534			0.154845	0.574746	0.00759773		0.154761	-0.008008	0.0225124		0.154792	-0.174941	0.003862		0.154606	0.100368	0.00865218
0.155614	-0.153841	0.0412858			0.155677	0.578562	0.00765535		0.155593	-0.004937	0.0227395		0.155624	-0.173074	0.00389027		0.155437	0.102477	0.00868774
0.156446	-0.150398	0.0415606			0.15651	0.582344	0.00771245		0.156425	-0.002608	0.0229117		0.156456	-0.171543	0.00391345		0.156268	0.104354	0.00871939
0.157278	-0.146238	0.0418927			0.157342	0.585883	0.00776589		0.157257	-0.000116	0.023096		0.157288	-0.169274	0.00394779		0.1571	0.107338	0.0087697
0.15811	-0.141225	0.0422929			0.158175	0.589751	0.00782429		0.158089	0.00233	0.0232768		0.15812	-0.165937	0.00399831		0.157931	0.111157	0.00883409
0.158942	-0.136374	0.0426801			0.159007	0.593199	0.00787635		0.158921	0.005949	0.0235444		0.158953	-0.161709	0.00406232		0.158762	0.114821	0.00889588
0.159774	-0.131115	0.0430999			0.15984	0.59557	0.00791215		0.159753	0.008465	0.0237304		0.159785	-0.157495	0.00412611		0.159593	0.116877	0.00893054
0.160607	-0.126466	0.043471			0.160672	0.599314	0.00796868		0.160585	0.01195	0.0239881		0.160617	-0.154049	0.00417828		0.160425	0.120625	0.00899374
0.161439	-0.121379	0.0438771			0.161505	0.604797	0.00805147		0.161417	0.014776	0.0241971		0.161449	-0.150061	0.00423865		0.161256	0.122464	0.00902475
0.162271	-0.117103	0.0442185			0.162337	0.608756	0.00811125		0.162249	0.018946	0.0245054		0.162282	-0.146175	0.00429748		0.162087	0.124977	0.00906712
0.163103	-0.112221	0.0446082			0.16317	0.611929	0.00815916		0.163081	0.023468	0.0248397		0.163114	-0.142456	0.00435378		0.162918	0.127819	0.00911504
0.163935	-0.106301	0.0450807			0.164002	0.615811	0.00821777		0.163913	0.02677	0.0250839		0.163946	-0.139219	0.00440278		0.163749	0.12962	0.00914541
0.164767	-0.101315	0.0454788			0.164835	0.620239	0.00828463		0.164745	0.031667	0.025446		0.164778	-0.136694	0.00444101		0.164581	0.132296	0.00919053
0.165599	-0.096909	0.0458305			0.165667	0.625191	0.0083594		0.165577	0.034491	0.0256548		0.16561	-0.133654	0.00448703		0.165412	0.134856	0.00923369
0.166432	-0.093165	0.0461293			0.1665	0.629138	0.008419		0.166409	0.038216	0.0259302		0.166443	-0.130204	0.00453926		0.166243	0.137467	0.00927772
0.167264	-0.087273	0.0465997			0.167332	0.631811	0.00845936		0.167241	0.041103	0.0261437		0.167275	-0.126478	0.00459566		0.167074	0.140977	0.0093369
0.168096	-0.082701	0.0469647			0.168165	0.636493	0.00853005		0.168073	0.044829	0.0264192		0.168107	-0.12237	0.00465785		0.167905	0.143828	0.00938498
0.168928	-0.076717	0.0474423			0.168997	0.640075	0.00858414		0.168905	0.04904	0.0267305		0.168939	-0.118637	0.00471436		0.168737	0.146958	0.00943775
0.16976	-0.070908	0.047906			0.16983	0.642407	0.00861935		0.169737	0.052329	0.0269737		0.169771	-0.114088	0.00478323		0.169568	0.151026	0.00950634
0.170592	-0.065678	0.0483235			0.170662	0.647443	0.00869539		0.17057	0.054647	0.0271451		0.170604	-0.110447	0.00483835		0.170399	0.154283	0.00956126
0.171425	-0.06137	0.0486674			0.171495	0.652111	0.00876587		0.171402	0.057622	0.0273651		0.171436	-0.10808	0.00487418		0.17123	0.15553	0.00958229
0.172257	-0.058185	0.0489217			0.172327	0.655101	0.00881102		0.172234	0.060516	0.0275791		0.172268	-0.106836	0.00489301		0.172062	0.158362	0.00963004
0.173089	-0.053169	0.0493221			0.17316	0.656478	0.00883181		0.173066	0.064749	0.027892		0.1731	-0.104537	0.00492782		0.172893	0.16169	0.00968616
0.173921	-0.048148	0.0497229			0.173992	0.658925	0.00886876		0.173898	0.068479	0.0281678		0.173933	-0.102746	0.00495493		0.173724	0.16356	0.00971769
0.174753	-0.04244	0.0501786			0.174825	0.660716	0.0088958		0.17473	0.071388	0.0283829		0.174765	-0.100044	0.00499583		0.174555	0.164134	0.00972736
0.175585	-0.039164	0.0504401			0.175657	0.662914	0.00892899		0.175562	0.073323	0.028526		0.175597	-0.098083	0.00502552		0.175386	0.165094	0.00974355
0.176418	-0.036693	0.0506373			0.17649	0.664305	0.00894999		0.176394	0.075758	0.028706		0.176429	-0.096451	0.00505023		0.176218	0.165774	0.00975502
0.17725	-0.033396	0.0509005			0.177322	0.665673	0.00897065		0.177226	0.077808	0.0288576		0.177261	-0.095117	0.00507042		0.177049	0.166807	0.00977244
0.178082	-0.029923	0.0511777			0.178155	0.668656	0.00901569		0.178058	0.080257	0.0290387		0.178094	-0.094702	0.0050767		0.17788	0.167338	0.00978139
0.178914	-0.027003	0.0514108			0.178987	0.670923	0.00904992		0.17889	0.08197	0.0291653		0.178926	-0.095891	0.0050587		0.178711	0.168641	0.00980336
0.179746	-0.024474	0.0516127			0.17982	0.672059	0.00906707		0.179722	0.083204	0.0292566		0.179758	-0.097736	0.00503077		0.179542	0.169864	0.00982398
0.180578	-0.022601	0.0517622			0.180652	0.67446	0.00910332		0.180554	0.084558	0.0293567		0.18059	-0.097884	0.00502853		0.180374	0.170789	0.00983958
0.18141	-0.021897	0.0518184			0.181485	0.675443	0.00911816		0.181386	0.085623	0.0294354		0.181422	-0.09716	0.00503949		0.181205	0.171226	0.00984695
0.182243	-0.020711	0.0519131			0.182317	0.675861	0.00912447		0.182218	0.088409	0.0296414		0.182255	-0.09692	0.00504313		0.182036	0.172574	0.00986968
0.183075	-0.018159	0.0521168			0.18315	0.67778	0.00915345		0.18305	0.089631	0.0297318		0.183087	-0.097524	0.00503398		0.182867	0.17398	0.00989338
0.183907	-0.015899	0.0522972			0.183982	0.678672	0.00916692		0.183882	0.090246	0.0297773		0.183919	-0.098414	0.00502051		0.183699	0.173884	0.00989176
0.184739	-0.01457	0.0524033			0.184815	0.680243	0.00919064		0.184714	0.091491	0.0298693		0.184751	-0.097817	0.00502955		0.18453	0.173842	0.00989106
0.185571	-0.013797	0.052465			0.185647	0.680856	0.00919989		0.185546	0.091478	0.0298684		0.185583	-0.097092	0.00504052		0.185361	0.174709	0.00990567
0.186403	-0.011225	0.0526703			0.18648	0.68274	0.00922834		0.186378	0.091542	0.0298731		0.186416	-0.096944	0.00504276		0.186192	0.17606	0.00992845
0.187236	-0.009353	0.0528198			0.187312	0.683631	0.00924179		0.18721	0.092028	0.029909		0.187248	-0.097205	0.00503881		0.187023	0.178241	0.00996523
0.188068	-0.008683	0.0528733			0.188145	0.684468	0.00925443		0.188042	0.092617	0.0299526		0.18808	-0.098224	0.00502339		0.187855	0.179935	0.00999379
0.1889	-0.006997	0.0530078			0.188977	0.684847	0.00926016		0.188875	0.093157	0.0299925		0.188912	-0.099658	0.00500168		0.188686	0.181632	0.0100224
0.189732	-0.005587	0.0531204			0.18981	0.684666	0.00925742		0.189707	0.09384	0.030043		0.189745	-0.100491	0.00498907		0.189517	0.182298	0.0100336
0.190564	-0.004523	0.0532053			0.190642	0.685247	0.00926619		0.190539	0.093576	0.0300235		0.190577	-0.101713	0.00497057		0.190348	0.181109	0.0100136
0.191396	-0.004369	0.0532176			0.191475	0.684881	0.00926067		0.191371	0.094343	0.0300802		0.191409	-0.102719	0.00495534		0.191179	0.181161	0.0100145
0.192229	-0.00339	0.0532958			0.192307	0.684742	0.00925857		0.192203	0.094961	0.0301259		0.192241	-0.103506	0.00494342		0.192011	0.181693	0.0100234
0.193061	-0.002225	0.0533888			0.19314	0.686137	0.00927963		0.193035	0.093863	0.0300447		0.193073	-0.103269	0.00494701		0.192842	0.182864	0.0100432
0.193893	-0.00225	0.0533868			0.193972	0.688801	0.00931986		0.193867	0.093422	0.0300121		0.193906	-0.102174	0.00496359		0.193673	0.18382	0.0100593
0.194725	-0.001298	0.0534628			0.194805	0.691376	0.00935874		0.194699	0.092443	0.0299397		0.194738	-0.100792	0.00498451		0.194504	0.183725	0.0100577
0.195557	0.000441	0.0536016			0.195637	0.693252	0.00938706		0.195531	0.091126	0.0298423		0.19557	-0.100816	0.00498415		0.195336	0.185014	0.0100794
0.196389	0.001839	0.0537132			0.19647	0.694356	0.00940373		0.196363	0.091231	0.0298501		0.196402	-0.100667	0.0049864		0.196167	0.185998	0.010096
0.197221	0.002812	0.0537909			0.197302	0.696134	0.00943058		0.197195	0.091947	0.029903		0.197234	-0.100119	0.0049947		0.196998	0.186919	0.0101116
0.198054	0.00369	0.053861			0.198135	0.697719	0.00945451		0.198027	0.093173	0.0299937		0.198067	-0.099906	0.00499792		0.197829	0.186821	0.0101099
0.198886	0.00376	0.0538665			0.198967	0.69954	0.00948201		0.198859	0.092378	0.0299349		0.198899	-0.100535	0.0049884		0.19866	0.187821	0.0101268
0.199718	0.005555	0.0540098			0.1998	0.700387	0.0094948		0.199691	0.092332	0.0299315		0.199731	-0.09956	0.00500316		0.199492	0.187113	0.0101148
0.20055	0.006433	0.0540799			0.200632	0.701624	0.00951347		0.200523	0.09373	0.0300349		0.200563	-0.09848	0.00501951		0.200323	0.18605	0.0100969
0.201382	0.006325	0.0540713			0.201465	0.702238	0.00952274		0.201355	0.094824	0.0301158		0.201396	-0.099842	0.00499889		0.201154	0.186979	0.0101126
0.202214	0.008164	0.0542181			0.202297	0.703199	0.00953725		0.202187	0.095048	0.0301323		0.202228	-0.099745	0.00500036		0.201985	0.18763	0.0101235
0.203047	0.008828	0.0542711			0.20313	0.703245	0.00953795		0.203019	0.093815	0.0300412		0.20306	-0.100358	0.00499108		0.202817	0.187686	0.0101245
0.203879	0.0091	0.0542928			0.203962	0.702732	0.0095302		0.203851	0.093363	0.0300077		0.203892	-0.100581	0.00498771		0.203648	0.187672	0.0101243
0.204711	0.009475	0.0543228			0.204795	0.703953	0.00954864		0.204683	0.093941	0.0300505		0.204724	-0.100439	0.00498985		0.204479	0.188878	0.0101446
0.205543	0.01038	0.054395			0.205627	0.703408	0.00954041		0.205515	0.093662	0.0300298		0.205557	-0.099645	0.00500187		0.20531	0.18918	0.0101497
0.206375	0.012127	0.0545345			0.20646	0.703222	0.0095376		0.206347	0.091915	0.0299007		0.206389	-0.100274	0.00499235		0.206141	0.188803	0.0101433
0.207207	0.013	0.0546041			0.207292	0.702078	0.00952033		0.20718	0.092839	0.029969		0.207221	-0.101023	0.00498101		0.206973	0.188298	0.0101348
0.20804	0.013484	0.0546428			0.208125	0.701629	0.00951355		0.208012	0.093414	0.0300115		0.208053	-0.10081	0.00498424		0.207804	0.186319	0.0101014
0.208872	0.013275	0.0546261			0.208957	0.702551	0.00952747		0.208844	0.092087	0.0299134		0.208885	-0.102029	0.00496578		0.208635	0.185253	0.0100835
0.209704	0.013401	0.0546362			0.20979	0.702908	0.00953286		0.209676	0.092229	0.0299239		0.209718	-0.101258	0.00497746		0.209466	0.184116	0.0100643
0.210536	0.014242	0.0547033			0.210622	0.703233	0.00953777		0.210508	0.091785	0.0298911		0.21055	-0.100899	0.00498289		0.210297	0.183646	0.0100564
0.211368	0.014911	0.0547567			0.211455	0.703434	0.0095408		0.21134	0.091584	0.0298762		0.211382	-0.1	0.0049965		0.211129	0.185814	0.0100929
0.2122	0.015876	0.0548337			0.212287	0.704381	0.0095551		0.212172	0.09178	0.0298907		0.212214	-0.100846	0.00498369		0.21196	0.185056	0.0100801
0.213032	0.016863	0.0549125			0.21312	0.704686	0.00955971		0.213004	0.091266	0.0298527		0.213047	-0.100941	0.00498226		0.212791	0.18529	0.0100841
0.213865	0.017697	0.0549791			0.213952	0.703924	0.0095482		0.213836	0.09308	0.0299868		0.213879	-0.100866	0.00498339		0.213622	0.184098	0.010064
0.214697	0.018373	0.0550331			0.214785	0.701453	0.00951089		0.214668	0.091966	0.0299044		0.214711	-0.102972	0.00495151		0.214454	0.183035	0.0100461
0.215529	0.019228	0.0551013			0.215617	0.699465	0.00948087		0.2155	0.091936	0.0299022		0.215543	-0.103557	0.00494265		0.215285	0.184125	0.0100644
0.216361	0.01753	0.0549658			0.21645	0.698356	0.00946413		0.216332	0.093112	0.0299892		0.216375	-0.104111	0.00493427		0.216116	0.18323	0.0100494
0.217193	0.017477	0.0549615			0.217282	0.695993	0.00942845		0.217164	0.092196	0.0299215		0.217208	-0.104413	0.00492969		0.216947	0.18336	0.0100515
0.218025	0.017503	0.0549636			0.218115	0.694687	0.00940873		0.217996	0.092023	0.0299087		0.21804	-0.105996	0.00490573		0.217778	0.182194	0.0100319
0.218858	0.017072	0.0549292			0.218947	0.694193	0.00940127		0.218828	0.089087	0.0296916		0.218872	-0.106685	0.0048953		0.21861	0.182171	0.0100315
0.21969	0.0178	0.0549873			0.21978	0.692267	0.00937219		0.21966	0.087324	0.0295612		0.219704	-0.107375	0.00488485		0.219441	0.181285	0.0100166
0.220522	0.016554	0.0548878			0.220612	0.691532	0.00936109		0.220492	0.085644	0.029437		0.220536	-0.108177	0.00487271		0.220272	0.180287	0.00999973
0.221354	0.015978	0.0548419			0.221445	0.689478	0.00933008		0.221324	0.08342	0.0292726		0.221369	-0.107695	0.00488001		0.221103	0.180324	0.0100004
0.222186	0.016155	0.054856			0.222277	0.68798	0.00930746		0.222156	0.081316	0.029117		0.222201	-0.10868	0.0048651		0.221934	0.178246	0.00996531
0.223018	0.015587	0.0548107			0.22311	0.687409	0.00929884		0.222988	0.080347	0.0290453		0.223033	-0.11075	0.00483376		0.222766	0.177335	0.00994995
0.223851	0.015396	0.0547954			0.223942	0.686601	0.00928664		0.22382	0.078903	0.0289386		0.223865	-0.111689	0.00481955		0.223597	0.177083	0.0099457
0.224683	0.015251	0.0547838			0.224775	0.685626	0.00927192		0.224653	0.077336	0.0288227		0.224698	-0.112882	0.00480149		0.224428	0.177931	0.00996
0.225515	0.014762	0.0547448			0.225607	0.683352	0.00923758		0.225485	0.075375	0.0286777		0.22553	-0.113736	0.00478856		0.225259	0.176521	0.00993623
0.226347	0.014309	0.0547086			0.22644	0.682591	0.00922609		0.226317	0.073062	0.0285067		0.226362	-0.115533	0.00476135		0.226091	0.176992	0.00994417
0.227179	0.014453	0.0547201			0.227272	0.682561	0.00922564		0.227149	0.073055	0.0285062		0.227194	-0.11641	0.00474808		0.226922	0.176318	0.00993281
0.228011	0.014166	0.0546972			0.228105	0.680497	0.00919447		0.227981	0.072119	0.028437		0.228026	-0.117141	0.00473701		0.227753	0.175996	0.00992738
0.228843	0.01392	0.0546776			0.228937	0.68021	0.00919014		0.228813	0.070395	0.0283095		0.228859	-0.118292	0.00471959		0.228584	0.175896	0.00992569
0.229676	0.015213	0.0547808			0.22977	0.679323	0.00917675		0.229645	0.06851	0.0281701		0.229691	-0.117917	0.00472526		0.229415	0.174719	0.00990584
0.230508	0.015466	0.054801			0.230602	0.678004	0.00915683		0.230477	0.067919	0.0281264		0.230523	-0.119128	0.00470693		0.230247	0.174266	0.00989821
0.23134	0.015159	0.0547765			0.231435	0.677324	0.00914656		0.231309	0.066645	0.0280322		0.231355	-0.121233	0.00467506		0.231078	0.174039	0.00989438
0.232172	0.014019	0.0546855			0.232267	0.676955	0.00914099		0.232141	0.065876	0.0279754		0.232187	-0.122459	0.0046565		0.231909	0.172511	0.00986861
0.233004	0.012124	0.0545342			0.2331	0.675482	0.00911875		0.232973	0.06504	0.0279136		0.23302	-0.123408	0.00464214		0.23274	0.171351	0.00984905
0.233836	0.012447	0.05456			0.233932	0.672489	0.00907356		0.233805	0.0629	0.0277553		0.233852	-0.124929	0.00461911		0.233571	0.171054	0.00984405
0.234669	0.012328	0.0545505			0.234765	0.670296	0.00904045		0.234637	0.060023	0.0275426		0.234684	-0.12499	0.00461819		0.234403	0.171497	0.00985152
0.235501	0.011879	0.0545147			0.235597	0.66895	0.00902012		0.235469	0.059006	0.0274674		0.235516	-0.125955	0.00460358		0.235234	0.171569	0.00985273
0.236333	0.010311	0.0543895			0.23643	0.668245	0.00900948		0.236301	0.057742	0.0273739		0.236348	-0.1285	0.00456505		0.236065	0.170851	0.00984062
0.237165	0.010643	0.054416			0.237262	0.667061	0.0089916		0.237133	0.055456	0.0272049		0.237181	-0.129962	0.00454292		0.236896	0.169962	0.00982563
0.237997	0.009962	0.0543616			0.238095	0.667649	0.00900048		0.237965	0.053891	0.0270892		0.238013	-0.130581	0.00453355		0.237728	0.169061	0.00981044
0.238829	0.010337	0.0543916			0.238927	0.666624	0.008985		0.238797	0.051789	0.0269338		0.238845	-0.13009	0.00454098		0.238559	0.168318	0.00979791
0.239662	0.010887	0.0544355			0.23976	0.663321	0.00893513		0.239629	0.050909	0.0268687		0.239677	-0.130272	0.00453823		0.23939	0.168038	0.00979319
0.240494	0.011824	0.0545103			0.240592	0.662075	0.00891632		0.240461	0.050907	0.0268686		0.24051	-0.1304	0.00453629		0.240221	0.16768	0.00978716
0.241326	0.011865	0.0545135			0.241425	0.660508	0.00889266		0.241293	0.049919	0.0267955		0.241342	-0.132023	0.00451172		0.241052	0.167484	0.00978385
0.242158	0.011605	0.0544928			0.242257	0.661193	0.008903		0.242125	0.049175	0.0267405		0.242174	-0.132516	0.00450426		0.241884	0.167128	0.00977785
0.24299	0.012676	0.0545783			0.24309	0.661194	0.00890302		0.242958	0.047798	0.0266387		0.243006	-0.131108	0.00452557		0.242715	0.167212	0.00977926
0.243822	0.013271	0.0546258			0.243922	0.657869	0.00885281		0.24379	0.047111	0.0265879		0.243838	-0.131372	0.00452157		0.243546	0.167044	0.00977643
0.244654	0.013388	0.0546351			0.244755	0.655851	0.00882234		0.244622	0.046057	0.02651		0.244671	-0.131973	0.00451248		0.244377	0.165888	0.00975694
0.245487	0.013368	0.0546335			0.245587	0.654215	0.00879764		0.245454	0.04578	0.0264895		0.245503	-0.130699	0.00453176		0.245208	0.164013	0.00972532
0.246319	0.014089	0.0546911			0.24642	0.653271	0.00878339		0.246286	0.046074	0.0265112		0.246335	-0.130582	0.00453353		0.24604	0.162878	0.00970619
0.247151	0.014207	0.0547005			0.247252	0.652274	0.00876833		0.247118	0.045525	0.0264706		0.247167	-0.131013	0.00452701		0.246871	0.161465	0.00968236
0.247983	0.013894	0.0546755			0.248085	0.652118	0.00876598		0.24795	0.044443	0.0263906		0.247999	-0.131749	0.00451587		0.247702	0.16032	0.00966306
0.248815	0.014358	0.0547125			0.248917	0.6509	0.00874759		0.248782	0.043329	0.0263083		0.248832	-0.132608	0.00450286		0.248533	0.159442	0.00964825
0.249647	0.014579	0.0547302			0.24975	0.650274	0.00873813		0.249614	0.042391	0.0262389		0.249664	-0.133749	0.00448559		0.249365	0.159077	0.0096421
0.25048	0.013977	0.0546821			0.250582	0.649675	0.00872909		0.250446	0.043124	0.0262931		0.250496	-0.133924	0.00448294		0.250196	0.158378	0.00963031
0.251312	0.014084	0.0546907			0.251415	0.648948	0.00871811		0.251278	0.041142	0.0261465		0.251328	-0.135051	0.00446588		0.251027	0.1571	0.00960876
0.252144	0.013353	0.0546323			0.252247	0.649123	0.00872076		0.25211	0.039388	0.0260169		0.252161	-0.133905	0.00448323		0.251858	0.155635	0.00958406
0.252976	0.013137	0.0546151			0.25308	0.647584	0.00869752		0.252942	0.03704	0.0258432		0.252993	-0.135039	0.00446606		0.252689	0.155386	0.00957986
0.253808	0.01486	0.0547526			0.253912	0.646784	0.00868544		0.253774	0.034947	0.0256885		0.253825	-0.134917	0.00446791		0.253521	0.155544	0.00958252
0.25464	0.01294	0.0545994			0.254744	0.647005	0.00868878		0.254606	0.03314	0.0255549		0.254657	-0.133887	0.0044835		0.254352	0.154821	0.00957033
0.255473	0.011005	0.0544449			0.255577	0.646631	0.00868313		0.255438	0.033181	0.0255579		0.255489	-0.134659	0.00447181		0.255183	0.153501	0.00954808
0.256305	0.010155	0.054377			0.256409	0.646349	0.00867887		0.25627	0.031877	0.0254615		0.256322	-0.134821	0.00446936		0.256014	0.152633	0.00953344
0.257137	0.011961	0.0545212			0.257242	0.645852	0.00867137		0.257102	0.030705	0.0253748		0.257154	-0.134628	0.00447228		0.256846	0.151065	0.009507
0.257969	0.011083	0.0544511			0.258074	0.64575	0.00866983		0.257934	0.031074	0.0254021		0.257986	-0.134979	0.00446697		0.257677	0.150585	0.00949891
0.258801	0.010095	0.0543722			0.258907	0.644944	0.00865766		0.258766	0.032324	0.0254945		0.258818	-0.137838	0.00442369		0.258508	0.150723	0.00950124
0.259633	0.009404	0.0543171			0.259739	0.644013	0.0086436		0.259598	0.032008	0.0254712		0.25965	-0.13966	0.00439611		0.259339	0.150658	0.00950014
0.260466	0.009505	0.0543251			0.260572	0.644463	0.00865039		0.260431	0.033788	0.0256028		0.260483	-0.140247	0.00438722		0.26017	0.150005	0.00948913
0.261298	0.007901	0.0541971			0.261404	0.644102	0.00864494		0.261263	0.032827	0.0255317		0.261315	-0.14168	0.00436553		0.261002	0.148298	0.00946035
0.26213	0.00761	0.0541739			0.262237	0.643337	0.00863339		0.262095	0.034415	0.0256492		0.262147	-0.141625	0.00436636		0.261833	0.146493	0.00942991
0.262962	0.008302	0.0542291			0.263069	0.641617	0.00860742		0.262927	0.03285	0.0255334		0.262979	-0.142807	0.00434847		0.262664	0.144887	0.00940283
0.263794	0.006607	0.0540938			0.263902	0.640572	0.00859164		0.263759	0.032695	0.025522		0.263811	-0.14577	0.00430361		0.263495	0.144088	0.00938936
0.264626	0.004843	0.053953			0.264734	0.641172	0.0086007		0.264591	0.031894	0.0254628		0.264644	-0.1474	0.00427893		0.264326	0.143507	0.00937956
0.265458	0.004501	0.0539257			0.265567	0.640612	0.00859225		0.265423	0.032504	0.0255079		0.265476	-0.14743	0.00427848		0.265158	0.143454	0.00937867
0.266291	0.00384	0.0538729			0.266399	0.640154	0.00858533		0.266255	0.031279	0.0254173		0.266308	-0.150701	0.00422896		0.265989	0.143373	0.0093773
0.267123	0.002321	0.0537517			0.267232	0.640045	0.00858369		0.267087	0.029272	0.0252689		0.26714	-0.152755	0.00419787		0.26682	0.142276	0.00935881
0.267955	0.002019	0.0537276			0.268064	0.639243	0.00857158		0.267919	0.028627	0.0252212		0.267973	-0.152442	0.00420261		0.267651	0.141621	0.00934776
0.268787	0.00129	0.0536694			0.268897	0.636993	0.0085376		0.268751	0.028866	0.0252389		0.268805	-0.15293	0.00419522		0.268483	0.140934	0.00933618
0.269619	0.000228	0.0535846			0.269729	0.637065	0.00853869		0.269583	0.028315	0.0251981		0.269637	-0.153787	0.00418224		0.269314	0.139859	0.00931805
0.270451	-0.000325	0.0535405			0.270562	0.636295	0.00852706		0.270415	0.029207	0.0252641		0.270469	-0.152933	0.00419517		0.270145	0.138476	0.00929473
0.271284	-0.000989	0.0534874			0.271394	0.634598	0.00850144		0.271247	0.028547	0.0252153		0.271301	-0.155528	0.00415589		0.270976	0.137609	0.00928011
0.272116	-0.002911	0.053334			0.272227	0.634094	0.00849383		0.272079	0.02963	0.0252954		0.272134	-0.156323	0.00414385		0.271807	0.137618	0.00928027
0.272948	-0.004642	0.0531958			0.273059	0.632478	0.00846943		0.272911	0.029833	0.0253104		0.272966	-0.157642	0.00412389		0.272639	0.137384	0.00927632
0.27378	-0.003348	0.0532991			0.273892	0.632557	0.00847062		0.273743	0.029219	0.025265		0.273798	-0.15774	0.0041224		0.27347	0.136146	0.00925545
0.274612	-0.003184	0.0533122			0.274724	0.63258	0.00847097		0.274575	0.02791	0.0251682		0.27463	-0.15998	0.00408849		0.274301	0.13493	0.00923494
0.275444	-0.00222	0.0533892			0.275557	0.631631	0.00845664		0.275407	0.027443	0.0251337		0.275463	-0.162244	0.00405422		0.275132	0.133733	0.00921476
0.276276	-0.000828	0.0535003			0.276389	0.63171	0.00845783		0.276239	0.026259	0.0250461		0.276295	-0.163791	0.0040308		0.275963	0.133237	0.0092064
0.277109	-0.000963	0.0534895			0.277222	0.630726	0.00844298		0.277071	0.026193	0.0250412		0.277127	-0.165738	0.00400132		0.276795	0.132533	0.00919453
0.277941	-0.001768	0.0534253			0.278054	0.62881	0.00841405		0.277903	0.025067	0.024958		0.277959	-0.166332	0.00399233		0.277626	0.132079	0.00918687
0.278773	-0.000875	0.0534965			0.278887	0.62777	0.00839834		0.278736	0.023868	0.0248693		0.278791	-0.168438	0.00396045		0.278457	0.130811	0.00916549
0.279605	-0.000727	0.0535084			0.279719	0.626418	0.00837793		0.279568	0.02313	0.0248148		0.279624	-0.168659	0.0039571		0.279288	0.130554	0.00916116
0.280437	-0.000797	0.0535028			0.280552	0.625274	0.00836066		0.2804	0.023319	0.0248287		0.280456	-0.169072	0.00395085		0.28012	0.130394	0.00915846
0.281269	-0.003097	0.0533192			0.281384	0.622796	0.00832324		0.281232	0.020343	0.0246087		0.281288	-0.171242	0.003918		0.280951	0.128948	0.00913408
0.282102	-0.004222	0.0532294			0.282217	0.622009	0.00831136		0.282064	0.019893	0.0245754		0.28212	-0.172911	0.00389274		0.281782	0.127475	0.00910924
0.282934	-0.005623	0.0531175			0.283049	0.621279	0.00830034		0.282896	0.01832	0.0244591		0.282952	-0.174196	0.00387328		0.282613	0.12747	0.00910916
0.283766	-0.006163	0.0530744			0.283882	0.621689	0.00830653		0.283728	0.018249	0.0244539		0.283785	-0.176243	0.00384229		0.283444	0.127848	0.00911553
0.284598	-0.00634	0.0530603			0.284714	0.620737	0.00829215		0.28456	0.017779	0.0244191		0.284617	-0.177387	0.00382498		0.284276	0.126753	0.00909707
0.28543	-0.007185	0.0529928			0.285547	0.62044	0.00828767		0.285392	0.015882	0.0242788		0.285449	-0.177563	0.00382231		0.285107	0.12594	0.00908336
0.286262	-0.006513	0.0530465			0.286379	0.619459	0.00827286		0.286224	0.01389	0.0241315		0.286281	-0.179346	0.00379532		0.285938	0.12576	0.00908032
0.287095	-0.006351	0.0530594			0.287212	0.618466	0.00825786		0.287056	0.013511	0.0241035		0.287113	-0.180782	0.00377358		0.286769	0.125057	0.00906847
0.287927	-0.006413	0.0530545			0.288044	0.617458	0.00824264		0.287888	0.01316	0.0240776		0.287946	-0.181867	0.00375715		0.2876	0.124797	0.00906409
0.288759	-0.007777	0.0529456			0.288877	0.6157	0.0082161		0.28872	0.01203	0.023994		0.288778	-0.18522	0.0037064		0.288432	0.124853	0.00906503
0.289591	-0.007983	0.0529291			0.289709	0.615326	0.00821045		0.289552	0.010781	0.0239017		0.28961	-0.18597	0.00369504		0.289263	0.123806	0.00904738
0.290423	-0.00906	0.0528432			0.290542	0.614405	0.00819654		0.290384	0.009964	0.0238413		0.290442	-0.18723	0.00367597		0.290094	0.123538	0.00904286
0.291255	-0.009703	0.0527918			0.291374	0.613136	0.00817738		0.291216	0.00844	0.0237286		0.291275	-0.187443	0.00367274		0.290925	0.123364	0.00903992
0.292087	-0.009624	0.0527981			0.292207	0.612109	0.00816188		0.292048	0.008315	0.0237193		0.292107	-0.187348	0.00367418		0.291757	0.122897	0.00903205
0.29292	-0.009288	0.052825			0.293039	0.61154	0.00815329		0.29288	0.008401	0.0237257		0.292939	-0.187952	0.00366504		0.292588	0.122769	0.00902989
0.293752	-0.007862	0.0529388			0.293872	0.610749	0.00814134		0.293712	0.008097	0.0237032		0.293771	-0.188127	0.00366239		0.293419	0.122215	0.00902055
0.294584	-0.008596	0.0528802			0.294704	0.609918	0.0081288		0.294544	0.008945	0.0237659		0.294603	-0.188895	0.00365076		0.29425	0.12173	0.00901237
0.295416	-0.00925	0.052828			0.295537	0.608712	0.00811059		0.295376	0.008757	0.023752		0.295436	-0.189067	0.00364816		0.295081	0.120888	0.00899817
0.296248	-0.00977	0.0527865			0.296369	0.607896	0.00809826		0.296209	0.01039	0.0238728		0.296268	-0.189226	0.00364575		0.295913	0.121098	0.00900171
0.29708	-0.010591	0.052721			0.297202	0.606404	0.00807574		0.297041	0.011641	0.0239653		0.2971	-0.190752	0.00362265		0.296744	0.120377	0.00898956
0.297913	-0.00977	0.0527865			0.298034	0.606659	0.00807959		0.297873	0.012135	0.0240018		0.297932	-0.192169	0.0036012		0.297575	0.118955	0.00896558
0.298745	-0.010396	0.0527365			0.298867	0.607466	0.00809177		0.298705	0.012246	0.02401		0.298764	-0.193741	0.0035774		0.298406	0.117419	0.00893968
0.299577	-0.011912	0.0526155			0.299699	0.606911	0.00808339		0.299537	0.012872	0.0240563		0.299597	-0.193497	0.00358109		0.299237	0.115321	0.00890431
0.300409	-0.012123	0.0525987			0.300532	0.606222	0.00807299		0.300369	0.012168	0.0240042		0.300429	-0.194311	0.00356877		0.300069	0.113812	0.00887886
0.301241	-0.012026	0.0526064			0.301364	0.606331	0.00807463		0.301201	0.011015	0.023919		0.301261	-0.194686	0.00356309		0.3009	0.111899	0.00884661
0.302073	-0.01176	0.0526276			0.302197	0.607289	0.0080891		0.302033	0.011852	0.0239809		0.302093	-0.194304	0.00356888		0.301731	0.111232	0.00883536
0.302906	-0.011244	0.0526688			0.303029	0.605881	0.00806784		0.302865	0.011935	0.023987		0.302926	-0.19502	0.00355804		0.302562	0.11208	0.00884966
0.303738	-0.01138	0.052658			0.303862	0.604809	0.00805165		0.303697	0.01109	0.0239245		0.303758	-0.196347	0.00353795		0.303394	0.112411	0.00885524
0.30457	-0.012126	0.0525984			0.304694	0.602897	0.00802278		0.304529	0.01061	0.023889		0.30459	-0.196618	0.00353385		0.304225	0.111311	0.00883669
0.305402	-0.012968	0.0525312			0.305527	0.601937	0.00800829		0.305361	0.009653	0.0238183		0.305422	-0.196019	0.00354291		0.305056	0.110949	0.00883059
0.306234	-0.012475	0.0525706			0.306359	0.601584	0.00800296		0.306193	0.009505	0.0238073		0.306254	-0.196835	0.00353056		0.305887	0.110983	0.00883116
0.307066	-0.01301	0.0525279			0.307192	0.600964	0.0079936		0.307025	0.010015	0.023845		0.307087	-0.197898	0.00351447		0.306718	0.110014	0.00881482
0.307899	-0.012754	0.0525483			0.308024	0.601835	0.00800675		0.307857	0.010486	0.0238799		0.307919	-0.198335	0.00350785		0.30755	0.109135	0.0088
0.308731	-0.013714	0.0524717			0.308857	0.60216	0.00801166		0.308689	0.010465	0.0238783		0.308751	-0.19817	0.00351035		0.308381	0.108285	0.00878567
0.309563	-0.013209	0.052512			0.309689	0.602534	0.0080173		0.309521	0.010049	0.0238475		0.309583	-0.19769	0.00351762		0.309212	0.107997	0.00878081
0.310395	-0.013102	0.0525205			0.310522	0.602609	0.00801844		0.310353	0.010769	0.0239008		0.310415	-0.199989	0.00348281		0.310043	0.10868	0.00879233
0.311227	-0.013365	0.0524995			0.311354	0.602433	0.00801578		0.311185	0.011089	0.0239244		0.311248	-0.200053	0.00348185		0.310874	0.107685	0.00877555
0.312059	-0.013496	0.0524891			0.312187	0.60166	0.00800411		0.312017	0.01003	0.0238461		0.31208	-0.201947	0.00345317		0.311706	0.106837	0.00876125
0.312891	-0.013834	0.0524621			0.313019	0.601944	0.00800839		0.312849	0.009195	0.0237844		0.312912	-0.204441	0.00341542		0.312537	0.106575	0.00875684
0.313724	-0.013565	0.0524835			0.313852	0.601604	0.00800326		0.313681	0.007515	0.0236602		0.313744	-0.204702	0.00341147		0.313368	0.106011	0.00874733
0.314556	-0.015796	0.0523055			0.314684	0.600717	0.00798987		0.314514	0.007368	0.0236493		0.314577	-0.206123	0.00338995		0.314199	0.105781	0.00874345
0.315388	-0.018087	0.0521226			0.315517	0.600667	0.00798911		0.315346	0.006787	0.0236064		0.315409	-0.207686	0.00336629		0.315031	0.105288	0.00873513
0.31622	-0.018833	0.052063			0.316349	0.600486	0.00798638		0.316178	0.007228	0.023639		0.316241	-0.207942	0.00336242		0.315862	0.105042	0.00873099
0.317052	-0.019126	0.0520396			0.317182	0.599927	0.00797794		0.31701	0.007374	0.0236498		0.317073	-0.209131	0.00334442		0.316693	0.104246	0.00871757
0.317884	-0.019191	0.0520344			0.318014	0.599812	0.0079762		0.317842	0.005423	0.0235055		0.317905	-0.208837	0.00334887		0.317524	0.104248	0.0087176
0.318717	-0.021052	0.0518859			0.318847	0.599189	0.0079668		0.318674	0.005536	0.0235139		0.318738	-0.208323	0.00335665		0.318355	0.104985	0.00873003
0.319549	-0.021202	0.0518739			0.319679	0.598756	0.00796026		0.319506	0.005271	0.0234943		0.31957	-0.207754	0.00336526		0.319187	0.105638	0.00874104
0.320381	-0.02103	0.0518876			0.320512	0.599206	0.00796705		0.320338	0.0045	0.0234373		0.320402	-0.208523	0.00335362		0.320018	0.106887	0.0087621
0.321213	-0.021532	0.0518476			0.321344	0.599466	0.00797098		0.32117	0.004189	0.0234143		0.321234	-0.20836	0.00335609		0.320849	0.107345	0.00876982
0.322045	-0.02403	0.0516482			0.322177	0.59996	0.00797844		0.322002	0.004018	0.0234016		0.322066	-0.210325	0.00332634		0.32168	0.107306	0.00876916
0.322877	-0.024617	0.0516013			0.323009	0.599538	0.00797207		0.322834	0.004456	0.023434		0.322899	-0.211636	0.0033065		0.322511	0.107351	0.00876992
0.32371	-0.026201	0.0514749			0.323842	0.598849	0.00796166		0.323666	0.004183	0.0234138		0.323731	-0.210879	0.00331796		0.323343	0.106693	0.00875883
0.324542	-0.026209	0.0514742			0.324674	0.597917	0.00794759		0.324498	0.004044	0.0234035		0.324563	-0.210623	0.00332183		0.324174	0.106698	0.00875891
0.325374	-0.025726	0.0515128			0.325507	0.596548	0.00792692		0.32533	0.003515	0.0233644		0.325395	-0.210455	0.00332437		0.325005	0.107196	0.00876731
0.326206	-0.02568	0.0515164			0.326339	0.597161	0.00793618		0.326162	0.00447	0.023435		0.326227	-0.21221	0.00329781		0.325836	0.106662	0.0087583
0.327038	-0.025193	0.0515553			0.327172	0.597181	0.00793648		0.326994	0.004255	0.0234191		0.32706	-0.211775	0.00330439		0.326668	0.105796	0.0087437
0.32787	-0.026837	0.0514241			0.328004	0.597313	0.00793847		0.327826	0.004567	0.0234422		0.327892	-0.210932	0.00331715		0.327499	0.10594	0.00874613
0.328702	-0.028593	0.0512839			0.328837	0.595324	0.00790844		0.328658	0.004714	0.0234531		0.328724	-0.21101	0.00331597		0.32833	0.10618	0.00875018
0.329535	-0.02867	0.0512778			0.329669	0.594704	0.00789908		0.32949	0.004521	0.0234388		0.329556	-0.211849	0.00330327		0.329161	0.105995	0.00874706
0.330367	-0.03025	0.0511516			0.330502	0.594903	0.00790208		0.330322	0.004958	0.0234711		0.330389	-0.213228	0.0032824		0.329992	0.105415	0.00873728
0.331199	-0.030467	0.0511343			0.331334	0.594206	0.00789156		0.331154	0.003328	0.0233506		0.331221	-0.212531	0.00329295		0.330824	0.10512	0.0087323
0.332031	-0.031053	0.0510875			0.332167	0.594206	0.00789156		0.331987	0.002282	0.0232733		0.332053	-0.21282	0.00328857		0.331655	0.105491	0.00873856
0.332863	-0.031198	0.051076			0.332999	0.594536	0.00789654		0.332819	0.002779	0.02331		0.332885	-0.214087	0.00326939		0.332486	0.10484	0.00872758
0.333695	-0.032095	0.0510044			0.333832	0.594971	0.00790311		0.333651	0.002719	0.0233056		0.333717	-0.211571	0.00330748		0.333317	0.104643	0.00872426
0.334528	-0.034317	0.050827			0.334664	0.594517	0.00789625		0.334483	0.002565	0.0232942		0.33455	-0.213269	0.00328177		0.334148	0.104486	0.00872161
0.33536	-0.035165	0.0507593			0.335497	0.593254	0.00787718		0.335315	0.002073	0.0232578		0.335382	-0.214474	0.00326353		0.33498	0.103976	0.00871301
0.336192	-0.03558	0.0507262			0.336329	0.593058	0.00787422		0.336147	0.003125	0.0233356		0.336214	-0.213841	0.00327312		0.335811	0.104123	0.00871549
0.337024	-0.035375	0.0507425			0.337162	0.59253	0.00786625		0.336979	0.004554	0.0234413		0.337046	-0.214566	0.00326214		0.336642	0.104586	0.0087233
0.337856	-0.035646	0.0507209			0.337994	0.592356	0.00786362		0.337811	0.002088	0.0232589		0.337878	-0.213379	0.00328011		0.337473	0.104752	0.0087261
0.338688	-0.035663	0.0507195			0.338827	0.591537	0.00785126		0.338643	0.002769	0.0233093		0.338711	-0.214508	0.00326302		0.338305	0.104404	0.00872023
0.339521	-0.035025	0.0507705			0.339659	0.591244	0.00784683		0.339475	0.002088	0.0232589		0.339543	-0.213853	0.00327293		0.339136	0.10407	0.0087146
0.340353	-0.035334	0.0507458			0.340492	0.590249	0.00783181		0.340307	0.001734	0.0232327		0.340375	-0.214718	0.00325984		0.339967	0.103754	0.00870927
0.341185	-0.035994	0.0506931			0.341324	0.589828	0.00782545		0.341139	0.001483	0.0232142		0.341207	-0.214824	0.00325823		0.340798	0.103123	0.00869863
0.342017	-0.036279	0.0506704			0.342157	0.58907	0.00781401		0.341971	-0.000114	0.0230961		0.34204	-0.21639	0.00323453		0.341629	0.102099	0.00868136
0.342849	-0.035025	0.0507705			0.342989	0.589238	0.00781655		0.342803	-0.000572	0.0230622		0.342872	-0.217059	0.0032244		0.342461	0.102065	0.00868079
0.343681	-0.03583	0.0507062			0.343822	0.589857	0.00782589		0.343635	-0.002183	0.0229431		0.343704	-0.216344	0.00323522		0.343292	0.101019	0.00866315
0.344513	-0.035883	0.050702			0.344654	0.591202	0.0078462		0.344467	-0.002988	0.0228836		0.344536	-0.216918	0.00322653		0.344123	0.100483	0.00865412
0.345346	-0.036394	0.0506612			0.345487	0.592664	0.00786828		0.345299	-0.004201	0.0227939		0.345368	-0.217186	0.00322248		0.344954	0.10027	0.00865052
0.346178	-0.036378	0.0506625			0.346319	0.594205	0.00789154		0.346131	-0.004191	0.0227947		0.346201	-0.217988	0.00321034		0.345785	0.099427	0.00863631
0.34701	-0.035833	0.050706			0.347152	0.593556	0.00788174		0.346963	-0.005546	0.0226945		0.347033	-0.217943	0.00321102		0.346617	0.097849	0.0086097
0.347842	-0.036543	0.0506493			0.347984	0.592281	0.00786249		0.347795	-0.004877	0.0227439		0.347865	-0.22031	0.00317518		0.347448	0.097293	0.00860033
0.348674	-0.037785	0.0505501			0.348817	0.591942	0.00785737		0.348627	-0.00653	0.0226217		0.348697	-0.221666	0.00315466		0.348279	0.097505	0.0086039
0.349506	-0.037281	0.0505904			0.349649	0.592566	0.0078668		0.349459	-0.007615	0.0225415		0.349529	-0.220819	0.00316748		0.34911	0.096179	0.00858154
0.350339	-0.036038	0.0506896			0.350482	0.59316	0.00787576		0.350292	-0.009165	0.0224269		0.350362	-0.221884	0.00315136		0.349942	0.09625	0.00858274
0.351171	-0.035103	0.0507642			0.351314	0.591243	0.00784682		0.351124	-0.008887	0.0224474		0.351194	-0.221873	0.00315152		0.350773	0.0964	0.00858527
0.352003	-0.035012	0.0507715			0.352147	0.591127	0.00784507		0.351956	-0.008523	0.0224743		0.352026	-0.222353	0.00314426		0.351604	0.095569	0.00857126
0.352835	-0.034138	0.0508413			0.352979	0.591012	0.00784333		0.352788	-0.008559	0.0224717		0.352858	-0.223627	0.00312497		0.352435	0.094196	0.00854811
0.353667	-0.035065	0.0507673			0.353812	0.59147	0.00785025		0.35362	-0.008566	0.0224712		0.353691	-0.223121	0.00313263		0.353266	0.093977	0.00854441
0.354499	-0.034944	0.0507769			0.354644	0.590566	0.0078366		0.354452	-0.00857	0.0224709		0.354523	-0.224101	0.00311779		0.354098	0.093335	0.00853359
0.355332	-0.033503	0.050892			0.355477	0.590066	0.00782905		0.355284	-0.007772	0.0225299		0.355355	-0.224449	0.00311253		0.354929	0.092183	0.00851417
0.356164	-0.031653	0.0510396			0.356309	0.590817	0.00784039		0.356116	-0.007506	0.0225495		0.356187	-0.223939	0.00312025		0.35576	0.091487	0.00850243
0.356996	-0.030985	0.051093			0.357142	0.590874	0.00784125		0.356948	-0.008125	0.0225038		0.357019	-0.224402	0.00311324		0.356591	0.090843	0.00849157
0.357828	-0.031559	0.0510471			0.357974	0.590068	0.00782908		0.35778	-0.009315	0.0224158		0.357852	-0.224408	0.00311315		0.357423	0.090156	0.00847999
0.35866	-0.031362	0.0510629			0.358807	0.591145	0.00784534		0.358612	-0.009581	0.0223961		0.358684	-0.22668	0.00307875		0.358254	0.088798	0.00845709
0.359492	-0.032154	0.0509996			0.359639	0.59163	0.00785266		0.359444	-0.009876	0.0223743		0.359516	-0.227297	0.00306941		0.359085	0.08833	0.0084492
0.360324	-0.032718	0.0509546			0.360472	0.591395	0.00784911		0.360276	-0.00949	0.0224028		0.360348	-0.229413	0.00303738		0.359916	0.087953	0.00844284
0.361157	-0.032698	0.0509562			0.361304	0.592864	0.0078713		0.361108	-0.009533	0.0223997		0.36118	-0.230595	0.00301948		0.360747	0.087736	0.00843918
0.361989	-0.031412	0.0510589			0.362137	0.592182	0.007861		0.36194	-0.010545	0.0223248		0.362013	-0.23207	0.00299716		0.361579	0.088111	0.00844551
0.362821	-0.031256	0.0510713			0.362969	0.593005	0.00787342		0.362772	-0.009462	0.0224049		0.362845	-0.231482	0.00300606		0.36241	0.087905	0.00844203
0.363653	-0.031579	0.0510455			0.363802	0.591304	0.00784774		0.363604	-0.010119	0.0223563		0.363677	-0.23034	0.00302335		0.363241	0.086918	0.00842539
0.364485	-0.030616	0.0511224			0.364634	0.589581	0.00782172		0.364436	-0.010901	0.0222985		0.364509	-0.231651	0.0030035		0.364072	0.08757	0.00843638
0.365317	-0.030293	0.0511482			0.365467	0.587907	0.00779645		0.365268	-0.011071	0.0222859		0.365341	-0.232644	0.00298847		0.364903	0.087798	0.00844023
0.36615	-0.030058	0.051167			0.366299	0.588749	0.00780916		0.3661	-0.010649	0.0223171		0.366174	-0.233453	0.00297622		0.365735	0.087113	0.00842868
0.366982	-0.031509	0.0510511			0.367132	0.587946	0.00779704		0.366932	-0.011975	0.0222191		0.367006	-0.234648	0.00295813		0.366566	0.08659	0.00841986
0.367814	-0.031061	0.0510869			0.367964	0.589069	0.00781399		0.367765	-0.012113	0.0222089		0.367838	-0.234929	0.00295387		0.367397	0.086994	0.00842667
0.368646	-0.030775	0.0511097			0.368797	0.59016	0.00783047		0.368597	-0.012038	0.0222144		0.36867	-0.235059	0.00295191		0.368228	0.087602	0.00843692
0.369478	-0.029117	0.0512421			0.369629	0.59139	0.00784904		0.369429	-0.011526	0.0222523		0.369503	-0.235166	0.00295029		0.36906	0.085695	0.00840477
0.37031	-0.028259	0.0513106			0.370462	0.591126	0.00784505		0.370261	-0.01248	0.0221818		0.370335	-0.236544	0.00292943		0.369891	0.085147	0.00839553
0.371143	-0.028543	0.0512879			0.371294	0.589828	0.00782545		0.371093	-0.01342	0.0221123		0.371167	-0.236508	0.00292997		0.370722	0.083814	0.00837305
0.371975	-0.029453	0.0512153			0.372127	0.590499	0.00783559		0.371925	-0.013327	0.0221191		0.371999	-0.238566	0.00289882		0.371553	0.082464	0.00835029
0.372807	-0.031739	0.0510328			0.372959	0.589904	0.0078266		0.372757	-0.013998	0.0220695		0.372831	-0.239566	0.00288368		0.372384	0.081346	0.00833144
0.373639	-0.033174	0.0509182			0.373792	0.588655	0.00780774		0.373589	-0.014433	0.0220374		0.373664	-0.240273	0.00287297		0.373216	0.081885	0.00834053
0.374471	-0.032341	0.0509847			0.374624	0.588209	0.00780101		0.374421	-0.014891	0.0220035		0.374496	-0.242097	0.00284536		0.374047	0.081699	0.00833739
0.375303	-0.032721	0.0509544			0.375457	0.589291	0.00781735		0.375253	-0.015439	0.021963		0.375328	-0.242184	0.00284404		0.374878	0.080981	0.00832528
0.376135	-0.032399	0.0509801			0.376289	0.589352	0.00781827		0.376085	-0.016428	0.0218899		0.37616	-0.243	0.00283169		0.375709	0.080284	0.00831353
0.376968	-0.034127	0.0508422			0.377122	0.590168	0.00783059		0.376917	-0.018653	0.0217253		0.376992	-0.244155	0.00281421		0.37654	0.079352	0.00829782
0.3778	-0.033588	0.0508852			0.377954	0.58897	0.0078125		0.377749	-0.019913	0.0216322		0.377825	-0.245508	0.00279372		0.377372	0.078519	0.00828377
0.378632	-0.032744	0.0509526			0.378787	0.590495	0.00783553		0.378581	-0.020308	0.021603		0.378657	-0.246855	0.00277333		0.378203	0.078221	0.00827875
0.379464	-0.033136	0.0509213			0.379619	0.589827	0.00782544		0.379413	-0.019455	0.021666		0.379489	-0.24793	0.00275706		0.379034	0.07877	0.008288
0.380296	-0.032508	0.0509714			0.380452	0.58984	0.00782564		0.380245	-0.01936	0.0216731		0.380321	-0.248735	0.00274487		0.379865	0.079	0.00829188
0.381128	-0.031763	0.0510309			0.381284	0.589739	0.00782411		0.381077	-0.021374	0.0215241		0.381154	-0.248997	0.00274091		0.380697	0.077888	0.00827313
0.381961	-0.032335	0.0509852			0.382117	0.589064	0.00781392		0.381909	-0.021658	0.0215031		0.381986	-0.249418	0.00273453		0.381528	0.076897	0.00825642
0.382793	-0.03231	0.0509872			0.382949	0.589629	0.00782245		0.382741	-0.020853	0.0215627		0.382818	-0.249048	0.00274013		0.382359	0.076157	0.00824394
0.383625	-0.031594	0.0510444			0.383782	0.589729	0.00782396		0.383573	-0.023077	0.0213982		0.38365	-0.250014	0.00272551		0.38319	0.075887	0.00823939
0.384457	-0.031125	0.0510818			0.384614	0.59107	0.00784421		0.384405	-0.023065	0.0213991		0.384482	-0.251492	0.00270314		0.384021	0.076111	0.00824317
0.385289	-0.029792	0.0511882			0.385447	0.591452	0.00784998		0.385237	-0.022482	0.0214422		0.385315	-0.252194	0.00269251		0.384853	0.075499	0.00823285
0.386121	-0.028662	0.0512784			0.386279	0.591351	0.00784845		0.38607	-0.02307	0.0213987		0.386147	-0.253058	0.00267943		0.385684	0.074196	0.00821088
0.386954	-0.028599	0.0512834			0.387112	0.591007	0.00784326		0.386902	-0.022338	0.0214529		0.386979	-0.254439	0.00265852		0.386515	0.073687	0.0082023
0.387786	-0.027673	0.0513574			0.387944	0.591124	0.00784502		0.387734	-0.021182	0.0215383		0.387811	-0.254043	0.00266452		0.387346	0.073712	0.00820272
0.388618	-0.028285	0.0513085			0.388777	0.591403	0.00784924		0.388566	-0.021721	0.0214985		0.388643	-0.254279	0.00266094		0.388177	0.074071	0.00820877
0.38945	-0.02834	0.0513041			0.389609	0.591059	0.00784404		0.389398	-0.023591	0.0213602		0.389476	-0.254011	0.002665		0.389009	0.07364	0.0082015
0.390282	-0.027309	0.0513864			0.390442	0.590201	0.00783109		0.39023	-0.023941	0.0213343		0.390308	-0.254769	0.00265353		0.38984	0.073788	0.008204
0.391114	-0.026218	0.0514735			0.391274	0.590441	0.00783471		0.391062	-0.022992	0.0214045		0.39114	-0.254703	0.00265453		0.390671	0.074015	0.00820783
0.391946	-0.025456	0.0515343			0.392107	0.590896	0.00784158		0.391894	-0.021782	0.021494		0.391972	-0.256097	0.00263342		0.391502	0.074209	0.0082111
0.392779	-0.025359	0.0515421			0.392939	0.591881	0.00785645		0.392726	-0.021407	0.0215217		0.392805	-0.255169	0.00264747		0.392334	0.074124	0.00820966
0.393611	-0.023693	0.0516751			0.393772	0.592173	0.00786086		0.393558	-0.022122	0.0214688		0.393637	-0.255969	0.00263536		0.393165	0.073298	0.00819574
0.394443	-0.021292	0.0518667			0.394604	0.592833	0.00787083		0.39439	-0.022692	0.0214267		0.394469	-0.25626	0.00263095		0.393996	0.071939	0.00817282
0.395275	-0.021049	0.0518861			0.395437	0.593743	0.00788457		0.395222	-0.022441	0.0214453		0.395301	-0.257035	0.00261922		0.394827	0.071028	0.00815746
0.396107	-0.019081	0.0520432			0.396269	0.593488	0.00788072		0.396054	-0.022248	0.0214595		0.396133	-0.257851	0.00260687		0.395658	0.072046	0.00817463
0.396939	-0.017755	0.0521491			0.397102	0.592915	0.00787207		0.396886	-0.021992	0.0214785		0.396966	-0.259252	0.00258566		0.39649	0.071719	0.00816911
0.397772	-0.016176	0.0522751			0.397934	0.592968	0.00787287		0.397718	-0.020644	0.0215781		0.397798	-0.259177	0.0025868		0.397321	0.071861	0.00817151
0.398604	-0.017425	0.0521754			0.398767	0.592948	0.00787256		0.39855	-0.020715	0.0215729		0.39863	-0.259801	0.00257735		0.398152	0.070577	0.00814986
0.399436	-0.018018	0.0521281			0.399599	0.592527	0.00786621		0.399382	-0.02128	0.0215311		0.399462	-0.261058	0.00255832		0.398983	0.068924	0.00812198
0.400268	-0.017826	0.0521434			0.400432	0.593206	0.00787646		0.400214	-0.022107	0.02147		0.400294	-0.260816	0.00256198		0.399814	0.06714	0.0080919
0.4011	-0.01793	0.0521351			0.401264	0.593673	0.00788351		0.401046	-0.023043	0.0214007		0.401127	-0.260235	0.00257078		0.400646	0.065335	0.00806147
0.401932	-0.018268	0.0521081			0.402097	0.594323	0.00789332		0.401878	-0.022863	0.0214141		0.401959	-0.259838	0.00257679		0.401477	0.065084	0.00805724
0.402765	-0.017686	0.0521546			0.402929	0.595312	0.00790826		0.40271	-0.024341	0.0213048		0.402791	-0.260125	0.00257244		0.402308	0.065067	0.00805695
0.403597	-0.018507	0.052089			0.403762	0.595745	0.0079148		0.403542	-0.025443	0.0212233		0.403623	-0.260388	0.00256846		0.403139	0.064655	0.00805
0.404429	-0.017974	0.0521316			0.404594	0.595492	0.00791098		0.404375	-0.025502	0.0212189		0.404456	-0.261604	0.00255005		0.403971	0.064981	0.0080555
0.405261	-0.018119	0.05212			0.405427	0.594644	0.00789817		0.405207	-0.024926	0.0212615		0.405288	-0.262529	0.00253605		0.404802	0.064971	0.00805533
0.406093	-0.017741	0.0521502			0.406259	0.595871	0.0079167		0.406039	-0.025714	0.0212033		0.40612	-0.262534	0.00253598		0.405633	0.063751	0.00803476
0.406925	-0.017734	0.0521507			0.407092	0.597365	0.00793926		0.406871	-0.025831	0.0211946		0.406952	-0.262303	0.00253947		0.406464	0.0639	0.00803727
0.407757	-0.01673	0.0522309			0.407924	0.597257	0.00793763		0.407703	-0.025582	0.021213		0.407784	-0.261833	0.00254659		0.407295	0.063558	0.00803151
0.40859	-0.016129	0.0522789			0.408757	0.598093	0.00795025		0.408535	-0.025918	0.0211882		0.408617	-0.261848	0.00254636		0.408127	0.064318	0.00804432
0.409422	-0.016738	0.0522303			0.409589	0.598378	0.00795455		0.409367	-0.02683	0.0211207		0.409449	-0.263425	0.00252249		0.408958	0.064306	0.00804412
0.410254	-0.016955	0.0522129			0.410422	0.599398	0.00796995		0.410199	-0.026459	0.0211482		0.410281	-0.265402	0.00249256		0.409789	0.063412	0.00802904
0.411086	-0.017758	0.0521488			0.411254	0.599161	0.00796637		0.411031	-0.026235	0.0211647		0.411113	-0.26651	0.00247578		0.41062	0.063532	0.00803107
0.411918	-0.01867	0.052076			0.412087	0.599462	0.00797092		0.411863	-0.02694	0.0211126		0.411945	-0.267982	0.0024535		0.411452	0.063617	0.0080325
0.41275	-0.01866	0.0520768			0.412919	0.600705	0.00798969		0.412695	-0.027478	0.0210728		0.412778	-0.267847	0.00245554		0.412283	0.064006	0.00803906
0.413583	-0.018079	0.0521232			0.413752	0.60078	0.00799082		0.413527	-0.028901	0.0209676		0.41361	-0.268046	0.00245253		0.413114	0.065031	0.00805634
0.414415	-0.017404	0.0521771			0.414584	0.603274	0.00802848		0.414359	-0.029605	0.0209156		0.414442	-0.268616	0.0024439		0.413945	0.066873	0.0080874
0.415247	-0.017939	0.0521344			0.415417	0.603844	0.00803708		0.415191	-0.029274	0.02094		0.415274	-0.26989	0.00242462		0.414776	0.067075	0.00809081
0.416079	-0.017487	0.0521705			0.416249	0.604136	0.00804149		0.416023	-0.029528	0.0209212		0.416106	-0.269732	0.00242701		0.415608	0.066856	0.00808711
0.416911	-0.018641	0.0520783			0.417082	0.605882	0.00806786		0.416855	-0.029976	0.0208881		0.416939	-0.271083	0.00240656		0.416439	0.06759	0.00809949
0.417743	-0.020004	0.0519695			0.417914	0.607902	0.00809836		0.417687	-0.030538	0.0208466		0.417771	-0.270831	0.00241037		0.41727	0.068063	0.00810747
0.418576	-0.019765	0.0519886			0.418747	0.608115	0.00810157		0.418519	-0.03083	0.020825		0.418603	-0.271828	0.00239528		0.418101	0.069195	0.00812655
0.419408	-0.018733	0.052071			0.419579	0.609608	0.00812411		0.419351	-0.03107	0.0208072		0.419435	-0.272335	0.0023876		0.418932	0.071384	0.00816346
0.42024	-0.017516	0.0521682			0.420412	0.610549	0.00813832		0.420183	-0.030871	0.0208219		0.420268	-0.272099	0.00239118		0.419764	0.072606	0.00818407
0.421072	-0.017251	0.0521893			0.421244	0.61126	0.00814906		0.421015	-0.030748	0.020831		0.4211	-0.272435	0.00238609		0.420595	0.073448	0.00819827
0.421904	-0.01722	0.0521918			0.422077	0.611709	0.00815584		0.421848	-0.030516	0.0208482		0.421932	-0.27372	0.00236664		0.421426	0.073114	0.00819263
0.422736	-0.017758	0.0521488			0.422909	0.61369	0.00818575		0.42268	-0.030523	0.0208477		0.422764	-0.274123	0.00236054		0.422257	0.072277	0.00817852
0.423568	-0.017894	0.052138			0.423742	0.613405	0.00818145		0.423512	-0.030522	0.0208477		0.423596	-0.274469	0.0023553		0.423089	0.072361	0.00817994
0.424401	-0.018269	0.052108			0.424574	0.612623	0.00816964		0.424344	-0.030189	0.0208724		0.424429	-0.274296	0.00235792		0.42392	0.073608	0.00820096
0.425233	-0.017632	0.0521589			0.425407	0.613454	0.00818219		0.425176	-0.030043	0.0208832		0.425261	-0.274363	0.0023569		0.424751	0.072656	0.00818491
0.426065	-0.016936	0.0522145			0.426239	0.614062	0.00819137		0.426008	-0.030722	0.020833		0.426093	-0.274594	0.0023534		0.425582	0.072791	0.00818719
0.426897	-0.01859	0.0520824			0.427072	0.61474	0.0082016		0.42684	-0.030844	0.0208239		0.426925	-0.276325	0.0023272		0.426413	0.074149	0.00821009
0.427729	-0.019503	0.0520095			0.427904	0.614913	0.00820422		0.427672	-0.030247	0.0208681		0.427757	-0.276852	0.00231922		0.427245	0.074521	0.00821636
0.428561	-0.020091	0.0519626			0.428737	0.615086	0.00820683		0.428504	-0.03174	0.0207577		0.42859	-0.277062	0.00231604		0.428076	0.074846	0.00822184
0.429394	-0.020347	0.0519422			0.429569	0.616114	0.00822235		0.429336	-0.032507	0.020701		0.429422	-0.277958	0.00230248		0.428907	0.073058	0.00819169
0.430226	-0.018995	0.0520501			0.430402	0.615999	0.00822061		0.430168	-0.030991	0.0208131		0.430254	-0.277769	0.00230534		0.429738	0.07266	0.00818498
0.431058	-0.018111	0.0521207			0.431234	0.615601	0.0082146		0.431	-0.029761	0.020904		0.431086	-0.27697	0.00231744		0.430569	0.072123	0.00817592
0.43189	-0.018439	0.0520945			0.432067	0.617291	0.00824012		0.431832	-0.029889	0.0208946		0.431919	-0.276219	0.0023288		0.431401	0.07269	0.00818548
0.432722	-0.018393	0.0520981			0.432899	0.618288	0.00825517		0.432664	-0.029958	0.0208895		0.432751	-0.275867	0.00233413		0.432232	0.073288	0.00819557
0.433554	-0.018812	0.0520647			0.433732	0.618357	0.00825622		0.433496	-0.029761	0.020904		0.433583	-0.276674	0.00232192		0.433063	0.072036	0.00817446
0.434387	-0.019239	0.0520306			0.434564	0.618733	0.00826189		0.434328	-0.029718	0.0209072		0.434415	-0.276214	0.00232888		0.433894	0.07113	0.00815918
0.435219	-0.018711	0.0520728			0.435397	0.617804	0.00824787		0.43516	-0.029769	0.0209034		0.435247	-0.27578	0.00233545		0.434726	0.070455	0.0081478
0.436051	-0.018756	0.0520692			0.436229	0.617273	0.00823985		0.435992	-0.029897	0.020894		0.43608	-0.274272	0.00235828		0.435557	0.071472	0.00816495
0.436883	-0.020156	0.0519574			0.437062	0.61736	0.00824116		0.436824	-0.029735	0.0209059		0.436912	-0.274246	0.00235867		0.436388	0.072286	0.00817867
0.437715	-0.020232	0.0519513			0.437894	0.616965	0.0082352		0.437656	-0.029668	0.0209109		0.437744	-0.275014	0.00234705		0.437219	0.071714	0.00816903
0.438547	-0.020296	0.0519462			0.438727	0.6164	0.00822667		0.438488	-0.029378	0.0209323		0.438576	-0.275417	0.00234095		0.43805	0.071132	0.00815921
0.43938	-0.020739	0.0519109			0.439559	0.617533	0.00824377		0.439321	-0.029391	0.0209314		0.439408	-0.27537	0.00234166		0.438882	0.070023	0.00814052
0.440212	-0.020708	0.0519133			0.440392	0.618156	0.00825318		0.440153	-0.029672	0.0209106		0.440241	-0.276215	0.00232887		0.439713	0.068589	0.00811634
0.441044	-0.02198	0.0518118			0.441224	0.617541	0.0082439		0.440985	-0.030227	0.0208696		0.441073	-0.276833	0.00231951		0.440544	0.066914	0.00808809
0.441876	-0.022188	0.0517952			0.442057	0.616828	0.00823313		0.441817	-0.03072	0.0208331		0.441905	-0.275941	0.00233301		0.441375	0.065965	0.00807209
0.442708	-0.021507	0.0518496			0.442889	0.617624	0.00824515		0.442649	-0.030425	0.0208549		0.442737	-0.276443	0.00232541		0.442206	0.065799	0.00806929
0.44354	-0.020726	0.0519119			0.443722	0.61752	0.00824358		0.443481	-0.029702	0.0209084		0.44357	-0.278189	0.00229898		0.443038	0.066472	0.00808064
0.444372	-0.020089	0.0519628			0.444554	0.617099	0.00823722		0.444313	-0.028932	0.0209653		0.444402	-0.278765	0.00229026		0.443869	0.067378	0.00809592
0.445205	-0.019761	0.0519889			0.445387	0.618627	0.00826029		0.445145	-0.028794	0.0209755		0.445234	-0.280274	0.00226742		0.4447	0.065913	0.00807121
0.446037	-0.021002	0.0518899			0.446219	0.619319	0.00827074		0.445977	-0.028198	0.0210196		0.446066	-0.280212	0.00226836		0.445531	0.066152	0.00807524
0.446869	-0.022535	0.0517675			0.447052	0.619542	0.00827411		0.446809	-0.027748	0.0210529		0.446898	-0.280862	0.00225852		0.446363	0.065659	0.00806693
0.447701	-0.022665	0.0517571			0.447884	0.619277	0.00827011		0.447641	-0.028405	0.0210043		0.447731	-0.280449	0.00226477		0.447194	0.064837	0.00805307
0.448533	-0.022316	0.051785			0.448717	0.619496	0.00827341		0.448473	-0.02934	0.0209351		0.448563	-0.280968	0.00225691		0.448025	0.064547	0.00804818
0.449365	-0.022931	0.0517359			0.449549	0.619112	0.00826762		0.449305	-0.028961	0.0209632		0.449395	-0.281396	0.00225043		0.448856	0.06402	0.0080393
0.450198	-0.023201	0.0517143			0.450382	0.618939	0.008265		0.450137	-0.028771	0.0209772		0.450227	-0.281813	0.00224412		0.449687	0.064313	0.00804424
0.45103	-0.024272	0.0516288			0.451214	0.619347	0.00827116		0.450969	-0.030064	0.0208816		0.451059	-0.283051	0.00222538		0.450519	0.063429	0.00802933
0.451862	-0.024547	0.0516069			0.452047	0.619428	0.00827239		0.451801	-0.032035	0.0207359		0.451892	-0.283941	0.00221191		0.45135	0.062531	0.00801419
0.452694	-0.024605	0.0516023			0.452879	0.61968	0.00827619		0.452633	-0.033267	0.0206448		0.452724	-0.28441	0.00220481		0.452181	0.061282	0.00799313
0.453526	-0.0246	0.0516027			0.453712	0.619677	0.00827615		0.453465	-0.033587	0.0206211		0.453556	-0.284768	0.00219939		0.453012	0.059686	0.00796622
0.454358	-0.024921	0.051577			0.454544	0.620089	0.00828237		0.454297	-0.03406	0.0205862		0.454388	-0.286527	0.00217276		0.453843	0.059301	0.00795973
0.455191	-0.024417	0.0516173			0.455377	0.621195	0.00829907		0.455129	-0.033786	0.0206064		0.45522	-0.287423	0.00215919		0.454675	0.058154	0.00794039
0.456023	-0.025356	0.0515423			0.456209	0.622167	0.00831374		0.455961	-0.033352	0.0206385		0.456053	-0.288175	0.00214781		0.455506	0.05756	0.00793037
0.456855	-0.025704	0.0515145			0.457042	0.624147	0.00834364		0.456793	-0.033828	0.0206033		0.456885	-0.289438	0.00212869		0.456337	0.0572	0.0079243
0.457687	-0.025393	0.0515394			0.457874	0.624793	0.00835339		0.457626	-0.03371	0.020612		0.457717	-0.289995	0.00212026		0.457168	0.057258	0.00792528
0.458519	-0.02496	0.0515739			0.458707	0.624433	0.00834796		0.458458	-0.033722	0.0206111		0.458549	-0.288708	0.00213974		0.458	0.055628	0.00789779
0.459351	-0.025287	0.0515478			0.459539	0.624571	0.00835004		0.45929	-0.033834	0.0206029		0.459382	-0.289682	0.00212499		0.458831	0.055865	0.00790179
0.460183	-0.026363	0.0514619			0.460372	0.623566	0.00833487		0.460122	-0.034122	0.0205816		0.460214	-0.290458	0.00211325		0.459662	0.055596	0.00789725
0.461016	-0.027062	0.0514061			0.461204	0.623388	0.00833218		0.460954	-0.033763	0.0206081		0.461046	-0.290281	0.00211593		0.460493	0.053907	0.00786878
0.461848	-0.026984	0.0514124			0.462037	0.624468	0.00834849		0.461786	-0.033649	0.0206165		0.461878	-0.290295	0.00211571		0.461324	0.054356	0.00787635
0.46268	-0.026854	0.0514227			0.462869	0.626187	0.00837444		0.462618	-0.033326	0.0206404		0.46271	-0.290396	0.00211419		0.462156	0.054437	0.00787771
0.463512	-0.027563	0.0513661			0.463702	0.626748	0.00838291		0.46345	-0.033418	0.0206336		0.463543	-0.289781	0.0021235		0.462987	0.055801	0.00790071
0.464344	-0.028342	0.0513039			0.464534	0.626671	0.00838175		0.464282	-0.034051	0.0205868		0.464375	-0.289443	0.00212861		0.463818	0.057184	0.00792403
0.465176	-0.028651	0.0512793			0.465367	0.627205	0.00838981		0.465114	-0.034658	0.0205419		0.465207	-0.29027	0.00211609		0.464649	0.055166	0.00789
0.466009	-0.028225	0.0513133			0.466199	0.627584	0.00839554		0.465946	-0.034752	0.020535		0.466039	-0.290556	0.00211176		0.465481	0.054555	0.0078797
0.466841	-0.028408	0.0512987			0.467032	0.627704	0.00839735		0.466778	-0.034657	0.020542		0.466871	-0.290408	0.002114		0.466312	0.054829	0.00788432
0.467673	-0.027841	0.0513439			0.467864	0.628531	0.00840983		0.46761	-0.034687	0.0205398		0.467704	-0.290133	0.00211817		0.467143	0.054926	0.00788596
0.468505	-0.026853	0.0514228			0.468697	0.629011	0.00841708		0.468442	-0.034435	0.0205584		0.468536	-0.290184	0.0021174		0.467974	0.054296	0.00787533
0.469337	-0.026912	0.0514181			0.469529	0.630258	0.00843591		0.469274	-0.033794	0.0206058		0.469368	-0.290884	0.0021068		0.468805	0.05275	0.00784927
0.470169	-0.027363	0.0513821			0.470362	0.629933	0.008431		0.470106	-0.034438	0.0205582		0.4702	-0.291218	0.00210174		0.469637	0.052126	0.00783875
0.471002	-0.028108	0.0513226			0.471194	0.629904	0.00843057		0.470938	-0.035638	0.0204695		0.471033	-0.291528	0.00209705		0.470468	0.051807	0.00783337
0.471834	-0.028349	0.0513034			0.472027	0.63009	0.00843337		0.47177	-0.035242	0.0204988		0.471865	-0.291126	0.00210313		0.471299	0.050852	0.00781726
0.472666	-0.028555	0.0512869			0.472859	0.630516	0.00843981		0.472602	-0.033711	0.020612		0.472697	-0.289876	0.00212206		0.47213	0.051684	0.00783129
0.473498	-0.028765	0.0512702			0.473692	0.63053	0.00844002		0.473434	-0.033079	0.0206587		0.473529	-0.290791	0.00210821		0.472961	0.051785	0.007833
0.47433	-0.028728	0.0512731			0.474524	0.630341	0.00843716		0.474266	-0.033496	0.0206279		0.474361	-0.291443	0.00209834		0.473793	0.051717	0.00783185
0.475162	-0.028496	0.0512917			0.475357	0.63171	0.00845783		0.475098	-0.033242	0.0206466		0.475194	-0.29082	0.00210777		0.474624	0.052052	0.0078375
0.475994	-0.02871	0.0512746			0.476189	0.631791	0.00845906		0.475931	-0.033289	0.0206432		0.476026	-0.291014	0.00210483		0.475455	0.051132	0.00782199
0.476827	-0.027897	0.0513395			0.477022	0.632596	0.00847121		0.476763	-0.034397	0.0205612		0.476858	-0.291939	0.00209083		0.476286	0.050514	0.00781156
0.477659	-0.027665	0.051358			0.477854	0.632872	0.00847538		0.477595	-0.03531	0.0204937		0.47769	-0.292059	0.00208901		0.477118	0.049247	0.0077902
0.478491	-0.027464	0.051374			0.478687	0.632843	0.00847494		0.478427	-0.036507	0.0204052		0.478522	-0.292398	0.00208388		0.477949	0.048421	0.00777627
0.479323	-0.027283	0.0513885			0.479519	0.634503	0.00850001		0.479259	-0.037942	0.0202991		0.479355	-0.293408	0.00206859		0.47878	0.048957	0.00778531
0.480155	-0.027647	0.0513594			0.480352	0.636027	0.00852302		0.480091	-0.03911	0.0202128		0.480187	-0.293175	0.00207212		0.479611	0.047306	0.00775747
0.480987	-0.027326	0.0513851			0.481184	0.637065	0.00853869		0.480923	-0.039615	0.0201754		0.481019	-0.293069	0.00207372		0.480442	0.047435	0.00775965
0.48182	-0.027559	0.0513665			0.482017	0.637854	0.0085506		0.481755	-0.039662	0.0201719		0.481851	-0.29374	0.00206356		0.481274	0.048747	0.00778177
0.482652	-0.02735	0.0513831			0.482849	0.638668	0.00856289		0.482587	-0.040108	0.020139		0.482684	-0.293988	0.00205981		0.482105	0.049755	0.00779877
0.483484	-0.028	0.0513312			0.483682	0.63782	0.00855009		0.483419	-0.04016	0.0201351		0.483516	-0.295709	0.00203375		0.482936	0.049119	0.00778804
0.484316	-0.028069	0.0513257			0.484514	0.635878	0.00852077		0.484251	-0.040332	0.0201224		0.484348	-0.296818	0.00201697		0.483767	0.048429	0.00777641
0.485148	-0.027682	0.0513566			0.485347	0.635835	0.00852012		0.485083	-0.041251	0.0200545		0.48518	-0.297141	0.00201208		0.484598	0.047069	0.00775348
0.48598	-0.028556	0.0512869			0.486179	0.637064	0.00853868		0.485915	-0.041769	0.0200162		0.486012	-0.297328	0.00200925		0.48543	0.046509	0.00774403
0.486813	-0.029428	0.0512173			0.487012	0.636579	0.00853135		0.486747	-0.042062	0.0199945		0.486845	-0.297581	0.00200542		0.486261	0.047744	0.00776486
0.487645	-0.029694	0.051196			0.487844	0.637284	0.008542		0.487579	-0.042896	0.0199328		0.487677	-0.299199	0.00198092		0.487092	0.047464	0.00776014
0.488477	-0.030653	0.0511195			0.488677	0.636588	0.00853149		0.488411	-0.043728	0.0198713		0.488509	-0.300271	0.00196469		0.487923	0.047113	0.00775422
0.489309	-0.031581	0.0510454			0.489509	0.63719	0.00854058		0.489243	-0.044778	0.0197937		0.489341	-0.300377	0.00196309		0.488755	0.046583	0.00774528
0.490141	-0.031417	0.0510585			0.490342	0.63661	0.00853182		0.490075	-0.04553	0.0197381		0.490173	-0.300169	0.00196624		0.489586	0.047608	0.00776257
0.490973	-0.030791	0.0511085			0.491174	0.637286	0.00854203		0.490907	-0.044688	0.0198003		0.491006	-0.300338	0.00196368		0.490417	0.048402	0.00777595
0.491805	-0.029642	0.0512002			0.492007	0.63758	0.00854647		0.491739	-0.043814	0.0198649		0.491838	-0.300825	0.00195631		0.491248	0.048154	0.00777177
0.492638	-0.02946	0.0512147			0.492839	0.637074	0.00853883		0.492571	-0.044935	0.0197821		0.49267	-0.301413	0.0019474		0.492079	0.050229	0.00780676
0.49347	-0.029315	0.0512263			0.493672	0.636808	0.00853481		0.493403	-0.046347	0.0196777		0.493502	-0.303797	0.00191131		0.492911	0.04943	0.00779329
0.494302	-0.02837	0.0513017			0.494504	0.637018	0.00853798		0.494236	-0.047267	0.0196096		0.494335	-0.303754	0.00191197		0.493742	0.049743	0.00779856
0.495134	-0.028803	0.0512671			0.495337	0.637296	0.00854218		0.495068	-0.048251	0.0195369		0.495167	-0.303739	0.00191219		0.494573	0.049227	0.00778986
0.495966	-0.028476	0.0512933			0.496169	0.636411	0.00852882		0.4959	-0.04958	0.0194386		0.495999	-0.303838	0.00191069		0.495404	0.04992	0.00780155
0.496798	-0.027917	0.0513379			0.497002	0.635539	0.00851565		0.496732	-0.050494	0.019371		0.496831	-0.30407	0.00190718		0.496235	0.051673	0.00783111
0.497631	-0.029628	0.0512013			0.497834	0.634576	0.00850111		0.497564	-0.050525	0.0193687		0.497663	-0.302671	0.00192836		0.497067	0.052567	0.00784618
0.498463	-0.029504	0.0512112			0.498667	0.63352	0.00848516		0.498396	-0.050789	0.0193492		0.498496	-0.302776	0.00192677		0.497898	0.054324	0.00787581
0.499295	-0.029027	0.0512493			0.499499	0.634171	0.00849499		0.499228	-0.050303	0.0193852		0.499328	-0.303367	0.00191782		0.498729	0.053922	0.00786903
0.500127	-0.028443	0.0512959			0.500332	0.633911	0.00849107		0.50006	-0.050322	0.0193837		0.50016	-0.30359	0.00191445		0.49956	0.053671	0.0078648
0.500959	-0.027368	0.0513817			0.501164	0.633811	0.00848956		0.500892	-0.050038	0.0194047		0.500992	-0.303467	0.00191631		0.500392	0.054821	0.00788419
0.501791	-0.027473	0.0513733			0.501997	0.634128	0.00849434		0.501724	-0.049	0.0194815		0.501824	-0.30332	0.00191854		0.501223	0.053929	0.00786915
0.502623	-0.028396	0.0512996			0.502829	0.63382	0.00848969		0.502556	-0.048907	0.0194884		0.502657	-0.302849	0.00192567		0.502054	0.053394	0.00786013
0.503456	-0.029725	0.0511935			0.503662	0.632244	0.0084659		0.503388	-0.048952	0.019485		0.503489	-0.303173	0.00192076		0.502885	0.052985	0.00785323
0.504288	-0.029799	0.0511876			0.504494	0.632127	0.00846413		0.50422	-0.050547	0.0193671		0.504321	-0.303295	0.00191891		0.503716	0.052381	0.00784305
0.50512	-0.03038	0.0511413			0.505327	0.63383	0.00848984		0.505052	-0.051058	0.0193293		0.505153	-0.304728	0.00189722		0.504548	0.051768	0.00783271
0.505952	-0.030688	0.0511167			0.506159	0.634187	0.00849524		0.505884	-0.050834	0.0193459		0.505985	-0.305817	0.00188073		0.505379	0.051509	0.00782834
0.506784	-0.029727	0.0511934			0.506992	0.633452	0.00848414		0.506716	-0.051417	0.0193028		0.506818	-0.305965	0.00187849		0.50621	0.051651	0.00783074
0.507616	-0.030088	0.0511646			0.507824	0.633081	0.00847854		0.507548	-0.051845	0.0192711		0.50765	-0.306316	0.00187318		0.507041	0.051358	0.0078258
0.508449	-0.030192	0.0511563			0.508657	0.633267	0.00848134		0.50838	-0.051626	0.0192873		0.508482	-0.305943	0.00187883		0.507872	0.050323	0.00780834
0.509281	-0.030417	0.0511383			0.509489	0.634039	0.008493		0.509212	-0.051244	0.0193156		0.509314	-0.304619	0.00189887		0.508704	0.049787	0.00779931
0.510113	-0.030096	0.0511639			0.510321	0.635082	0.00850875		0.510044	-0.050538	0.0193678		0.510147	-0.304362	0.00190276		0.509535	0.049825	0.00779995
0.510945	-0.029615	0.0512023			0.511154	0.635837	0.00852015		0.510876	-0.050426	0.0193761		0.510979	-0.30463	0.0018987		0.510366	0.049796	0.00779946
0.511777	-0.029483	0.0512129			0.511986	0.637124	0.00853958		0.511708	-0.050936	0.0193383		0.511811	-0.305345	0.00188788		0.511197	0.049118	0.00778803
0.512609	-0.030127	0.0511615			0.512819	0.637322	0.00854257		0.512541	-0.051736	0.0192792		0.512643	-0.305165	0.00189061		0.512029	0.049492	0.00779433
0.513442	-0.030915	0.0510986			0.513651	0.638397	0.0085588		0.513373	-0.051383	0.0193053		0.513475	-0.305151	0.00189082		0.51286	0.047921	0.00776784
0.514274	-0.031859	0.0510232			0.514484	0.639141	0.00857004		0.514205	-0.050478	0.0193722		0.514308	-0.305124	0.00189123		0.513691	0.047857	0.00776676
0.515106	-0.032348	0.0509842			0.515316	0.639592	0.00857685		0.515037	-0.049478	0.0194462		0.51514	-0.305352	0.00188777		0.514522	0.045969	0.00773493
0.515938	-0.031534	0.0510491			0.516149	0.640521	0.00859087		0.515869	-0.048301	0.0195332		0.515972	-0.30567	0.00188296		0.515353	0.045254	0.00772287
0.51677	-0.032663	0.050959			0.516981	0.641754	0.00860949		0.516701	-0.047295	0.0196076		0.516804	-0.305862	0.00188005		0.516185	0.044536	0.00771077
0.517602	-0.033432	0.0508976			0.517814	0.641814	0.0086104		0.517533	-0.046392	0.0196743		0.517636	-0.306489	0.00187056		0.517016	0.043264	0.00768932
0.518435	-0.03294	0.0509369			0.518646	0.641433	0.00860464		0.518365	-0.045381	0.0197491		0.518469	-0.307332	0.0018578		0.517847	0.042344	0.00767381
0.519267	-0.03379	0.0508691			0.519479	0.642689	0.00862361		0.519197	-0.044462	0.019817		0.519301	-0.307485	0.00185548		0.518678	0.04024	0.00763833
0.520099	-0.035176	0.0507584			0.520311	0.643946	0.00864259		0.520029	-0.044754	0.0197954		0.520133	-0.307651	0.00185297		0.519509	0.038831	0.00761457
0.520931	-0.036393	0.0506613			0.521144	0.644674	0.00865358		0.520861	-0.04541	0.0197469		0.520965	-0.307974	0.00184808		0.520341	0.037543	0.00759285
0.521763	-0.037135	0.050602			0.521976	0.644467	0.00865045		0.521693	-0.045292	0.0197557		0.521798	-0.308571	0.00183904		0.521172	0.035438	0.00755736
0.522595	-0.036738	0.0506337			0.522809	0.644598	0.00865243		0.522525	-0.04643	0.0196715		0.52263	-0.309937	0.00181836		0.522003	0.035185	0.0075531
0.523427	-0.0356	0.0507246			0.523641	0.645025	0.00865888		0.523357	-0.047798	0.0195704		0.523462	-0.311332	0.00179725		0.522834	0.035071	0.00755117
0.52426	-0.034493	0.0508129			0.524474	0.646869	0.00868672		0.524189	-0.048251	0.0195369		0.524294	-0.31126	0.00179834		0.523666	0.034067	0.00753424
0.525092	-0.03405	0.0508483			0.525306	0.647416	0.00869498		0.525021	-0.047845	0.0195669		0.525126	-0.311246	0.00179855		0.524497	0.033781	0.00752942
0.525924	-0.033811	0.0508674			0.526139	0.64817	0.00870637		0.525853	-0.047676	0.0195794		0.525959	-0.311569	0.00179366		0.525328	0.033148	0.00751875
0.526756	-0.033812	0.0508673			0.526971	0.648694	0.00871428		0.526685	-0.048343	0.0195301		0.526791	-0.311309	0.00179759		0.526159	0.032967	0.0075157
0.527588	-0.034938	0.0507774			0.527804	0.649018	0.00871917		0.527517	-0.047621	0.0195835		0.527623	-0.311283	0.00179799		0.52699	0.033055	0.00751718
0.52842	-0.03542	0.0507389			0.528636	0.649778	0.00873065		0.528349	-0.046201	0.0196885		0.528455	-0.31216	0.00178471		0.527822	0.032936	0.00751517
0.529253	-0.034762	0.0507915			0.529469	0.650189	0.00873685		0.529181	-0.045449	0.0197441		0.529287	-0.3122	0.00178411		0.528653	0.032593	0.00750939
0.530085	-0.034083	0.0508457			0.530301	0.650274	0.00873813		0.530014	-0.045224	0.0197607		0.53012	-0.312345	0.00178191		0.529484	0.032417	0.00750642
0.530917	-0.034111	0.0508434			0.531134	0.650942	0.00874822		0.530846	-0.044885	0.0197858		0.530952	-0.313624	0.00176255		0.530315	0.031971	0.0074989
0.531749	-0.035357	0.050744			0.531966	0.651066	0.00875009		0.531678	-0.044263	0.0198317		0.531784	-0.314476	0.00174965		0.531147	0.031166	0.00748533
0.532581	-0.035796	0.0507089			0.532799	0.650318	0.0087388		0.53251	-0.044352	0.0198252		0.532616	-0.314625	0.00174739		0.531978	0.03057	0.00747528
0.533413	-0.035329	0.0507462			0.533631	0.651317	0.00875388		0.533342	-0.044245	0.0198331		0.533449	-0.314504	0.00174923		0.532809	0.029334	0.00745444
0.534246	-0.035051	0.0507684			0.534464	0.651887	0.00876249		0.534174	-0.043564	0.0198834		0.534281	-0.314126	0.00175495		0.53364	0.030166	0.00746847
0.535078	-0.034354	0.050824			0.535296	0.651714	0.00875988		0.535006	-0.043037	0.0199224		0.535113	-0.31396	0.00175746		0.534471	0.03067	0.00747697
0.53591	-0.034085	0.0508455			0.536129	0.650573	0.00874265		0.535838	-0.04257	0.0199569		0.535945	-0.31362	0.00176261		0.535303	0.032235	0.00750335
0.536742	-0.035359	0.0507438			0.536961	0.650237	0.00873758		0.53667	-0.041289	0.0200516		0.536777	-0.313844	0.00175922		0.536134	0.030997	0.00748248
0.537574	-0.036758	0.0506321			0.537794	0.649895	0.00873241		0.537502	-0.040172	0.0201342		0.53761	-0.314493	0.00174939		0.536965	0.030357	0.00747169
0.538406	-0.037465	0.0505757			0.538626	0.651662	0.00875909		0.538334	-0.040247	0.0201287		0.538442	-0.31454	0.00174868		0.537796	0.030832	0.0074797
0.539238	-0.037821	0.0505473			0.539459	0.652684	0.00877452		0.539166	-0.040822	0.0200862		0.539274	-0.314421	0.00175048		0.538627	0.030956	0.00748179
0.540071	-0.037347	0.0505851			0.540291	0.652566	0.00877274		0.539998	-0.040777	0.0200895		0.540106	-0.315054	0.0017409		0.539459	0.031304	0.00748766
0.540903	-0.037213	0.0505958			0.541124	0.652063	0.00876515		0.54083	-0.040494	0.0201104		0.540938	-0.314416	0.00175056		0.54029	0.031302	0.00748762
0.541735	-0.03734	0.0505857			0.541956	0.65187	0.00876223		0.541662	-0.040604	0.0201023		0.541771	-0.314612	0.00174759		0.541121	0.031016	0.0074828
0.542567	-0.037228	0.0505946			0.542789	0.65218	0.00876691		0.542494	-0.040963	0.0200757		0.542603	-0.315056	0.00174087		0.541952	0.030741	0.00747816
0.543399	-0.037912	0.05054			0.543621	0.652383	0.00876998		0.543326	-0.041034	0.0200705		0.543435	-0.314526	0.00174889		0.542783	0.031567	0.00749209
0.544231	-0.038892	0.0504618			0.544454	0.653618	0.00878863		0.544158	-0.040418	0.020116		0.544267	-0.314206	0.00175374		0.543615	0.030879	0.00748049
0.545064	-0.03979	0.0503901			0.545286	0.653888	0.0087927		0.54499	-0.039553	0.02018		0.545099	-0.315038	0.00174114		0.544446	0.031156	0.00748516
0.545896	-0.040403	0.0503412			0.546119	0.653522	0.00878718		0.545822	-0.038425	0.0202634		0.545932	-0.315026	0.00174132		0.545277	0.031659	0.00749364
0.546728	-0.040501	0.0503333			0.546951	0.652885	0.00877756		0.546654	-0.037571	0.0203266		0.546764	-0.314124	0.00175498		0.546108	0.032501	0.00750784
0.54756	-0.039911	0.0503804			0.547784	0.652995	0.00877922		0.547487	-0.036907	0.0203756		0.547596	-0.314174	0.00175422		0.54694	0.030719	0.00747779
0.548392	-0.039399	0.0504213			0.548616	0.653204	0.00878237		0.548319	-0.03721	0.0203532		0.548428	-0.314496	0.00174935		0.547771	0.029895	0.0074639
0.549224	-0.039328	0.050427			0.549449	0.653997	0.00879435		0.549151	-0.03856	0.0202534		0.549261	-0.313578	0.00176324		0.548602	0.029473	0.00745678
0.550057	-0.039882	0.0503827			0.550281	0.654296	0.00879886		0.549983	-0.039709	0.0201685		0.550093	-0.312982	0.00177227		0.549433	0.028769	0.00744491
0.550889	-0.040338	0.0503463			0.551114	0.654863	0.00880742		0.550815	-0.040763	0.0200905		0.550925	-0.313104	0.00177042		0.550264	0.028448	0.0074395
0.551721	-0.041017	0.0502921			0.551946	0.654303	0.00879897		0.551647	-0.041163	0.020061		0.551757	-0.312846	0.00177433		0.551096	0.028662	0.00744311
0.552553	-0.04102	0.0502919			0.552779	0.654244	0.00879808		0.552479	-0.041296	0.0200511		0.552589	-0.313476	0.00176479		0.551927	0.028501	0.00744039
0.553385	-0.041186	0.0502787			0.553611	0.654644	0.00880412		0.553311	-0.041049	0.0200694		0.553422	-0.314312	0.00175213		0.552758	0.027713	0.00742711
0.554217	-0.042493	0.0501743			0.554444	0.655202	0.00881254		0.554143	-0.040917	0.0200791		0.554254	-0.314771	0.00174518		0.553589	0.027538	0.00742416
0.555049	-0.0429	0.0501418			0.555276	0.65475	0.00880572		0.554975	-0.041285	0.0200519		0.555086	-0.315366	0.00173618		0.554421	0.027379	0.00742147
0.555882	-0.0437	0.050078			0.556109	0.655522	0.00881737		0.555807	-0.04184	0.0200109		0.555918	-0.315129	0.00173976		0.555252	0.026158	0.00740089
0.556714	-0.043803	0.0500697			0.556941	0.657103	0.00884125		0.556639	-0.043604	0.0198805		0.55675	-0.31531	0.00173702		0.556083	0.024529	0.00737342
0.557546	-0.042932	0.0501393			0.557774	0.658171	0.00885737		0.557471	-0.04621	0.0196878		0.557583	-0.315783	0.00172986		0.556914	0.024427	0.0073717
0.558378	-0.041704	0.0502373			0.558606	0.65892	0.00886868		0.558303	-0.048031	0.0195531		0.558415	-0.315751	0.00173035		0.557745	0.025017	0.00738165
0.55921	-0.041893	0.0502222			0.559439	0.659213	0.00887311		0.559135	-0.04893	0.0194867		0.559247	-0.31538	0.00173597		0.558577	0.024684	0.00737603
0.560042	-0.04265	0.0501618			0.560271	0.659314	0.00887463		0.559967	-0.049701	0.0194297		0.560079	-0.316206	0.00172346		0.559408	0.024683	0.00737602
0.560875	-0.043646	0.0500823			0.561104	0.658897	0.00886833		0.560799	-0.049872	0.019417		0.560912	-0.316661	0.00171657		0.560239	0.025574	0.00739104
0.561707	-0.044332	0.0500275			0.561936	0.658094	0.00885621		0.561631	-0.049306	0.0194589		0.561744	-0.317448	0.00170466		0.56107	0.025518	0.0073901
0.562539	-0.044905	0.0499818			0.562769	0.658192	0.00885769		0.562463	-0.048802	0.0194961		0.562576	-0.316554	0.00171819		0.561901	0.025165	0.00738414
0.563371	-0.045343	0.0499468			0.563601	0.657376	0.00884537		0.563295	-0.048656	0.0195069		0.563408	-0.315855	0.00172877		0.562733	0.02565	0.00739232
0.564203	-0.045703	0.0499181			0.564434	0.6582	0.00885781		0.564127	-0.048833	0.0194938		0.56424	-0.315648	0.00173191		0.563564	0.024756	0.00737725
0.565035	-0.045781	0.0499119			0.565266	0.657432	0.00884621		0.564959	-0.049822	0.0194207		0.565073	-0.315099	0.00174022		0.564395	0.02431	0.00736973
0.565868	-0.045654	0.049922			0.566099	0.658069	0.00885583		0.565792	-0.051064	0.0193289		0.565905	-0.314564	0.00174832		0.565226	0.023358	0.00735367
0.5667	-0.045612	0.0499253			0.566931	0.658949	0.00886912		0.566624	-0.052122	0.0192507		0.566737	-0.314888	0.00174341		0.566058	0.022209	0.0073343
0.567532	-0.045969	0.0498968			0.567764	0.65914	0.008872		0.567456	-0.053309	0.0191629		0.567569	-0.315602	0.0017326		0.566889	0.022226	0.00733459
0.568364	-0.046571	0.0498488			0.568596	0.658859	0.00886776		0.568288	-0.053399	0.0191562		0.568401	-0.315717	0.00173086		0.56772	0.023361	0.00735373
0.569196	-0.04731	0.0497898			0.569429	0.659595	0.00887887		0.56912	-0.053401	0.0191561		0.569234	-0.315946	0.0017274		0.568551	0.023829	0.00736162
0.570028	-0.048705	0.0496784			0.570261	0.658123	0.00885665		0.569952	-0.054133	0.019102		0.570066	-0.31708	0.00171023		0.569382	0.023236	0.00735162
0.570861	-0.048767	0.0496735			0.571094	0.657091	0.00884106		0.570784	-0.054419	0.0190808		0.570898	-0.318451	0.00168947		0.570214	0.023748	0.00736025
0.571693	-0.048106	0.0497263			0.571926	0.656656	0.0088345		0.571616	-0.053336	0.0191609		0.57173	-0.320126	0.00166412		0.571045	0.024014	0.00736474
0.572525	-0.046993	0.0498151			0.572759	0.656458	0.00883151		0.572448	-0.052031	0.0192574		0.572563	-0.321628	0.00164138		0.571876	0.023757	0.0073604
0.573357	-0.046549	0.0498505			0.573591	0.656264	0.00882858		0.57328	-0.052839	0.0191976		0.573395	-0.322021	0.00163543		0.572707	0.024432	0.00737178
0.574189	-0.046722	0.0498367			0.574424	0.654819	0.00880676		0.574112	-0.052412	0.0192292		0.574227	-0.321873	0.00163767		0.573538	0.025618	0.00739178
0.575021	-0.046186	0.0498795			0.575256	0.65423	0.00879787		0.574944	-0.051768	0.0192768		0.575059	-0.321714	0.00164008		0.57437	0.025632	0.00739202
0.575853	-0.045447	0.0499385			0.576089	0.654645	0.00880413		0.575776	-0.052413	0.0192291		0.575891	-0.322145	0.00163355		0.575201	0.025351	0.00738728
0.576686	-0.045035	0.0499714			0.576921	0.654903	0.00880803		0.576608	-0.054031	0.0191095		0.576724	-0.322971	0.00162105		0.576032	0.025816	0.00739512
0.577518	-0.044735	0.0499954			0.577754	0.655028	0.00880992		0.57744	-0.054471	0.019077		0.577556	-0.323674	0.00161041		0.576863	0.026999	0.00741507
0.57835	-0.044972	0.0499764			0.578586	0.654803	0.00880652		0.578272	-0.053229	0.0191688		0.578388	-0.324167	0.00160294		0.577695	0.027286	0.00741991
0.579182	-0.046271	0.0498727			0.579419	0.653276	0.00878346		0.579104	-0.052252	0.019241		0.57922	-0.324254	0.00160163		0.578526	0.027044	0.00741583
0.580014	-0.04669	0.0498393			0.580251	0.652728	0.00877519		0.579936	-0.052383	0.0192314		0.580052	-0.324562	0.00159696		0.579357	0.027418	0.00742213
0.580846	-0.046397	0.0498627			0.581084	0.651721	0.00875998		0.580768	-0.052745	0.0192046		0.580885	-0.32493	0.00159139		0.580188	0.02684	0.00741239
0.581679	-0.046654	0.0498422			0.581916	0.651352	0.00875441		0.5816	-0.052739	0.019205		0.581717	-0.324902	0.00159182		0.581019	0.02574	0.00739384
0.582511	-0.046858	0.0498259			0.582749	0.650828	0.0087465		0.582432	-0.053278	0.0191652		0.582549	-0.324384	0.00159966		0.581851	0.026362	0.00740433
0.583343	-0.046624	0.0498446			0.583581	0.650366	0.00873952		0.583265	-0.053544	0.0191455		0.583381	-0.325024	0.00158997		0.582682	0.027417	0.00742212
0.584175	-0.046969	0.049817			0.584414	0.651161	0.00875153		0.584097	-0.05376	0.0191295		0.584213	-0.326322	0.00157032		0.583513	0.028081	0.00743331
0.585007	-0.047552	0.0497705			0.585246	0.649461	0.00872586		0.584929	-0.053077	0.01918		0.585046	-0.327806	0.00154785		0.584344	0.028601	0.00744208
0.585839	-0.047364	0.0497855			0.586079	0.649593	0.00872785		0.585761	-0.051429	0.0193019		0.585878	-0.329251	0.00152598		0.585176	0.0288	0.00744543
0.586671	-0.047425	0.0497806			0.586911	0.647833	0.00870128		0.586593	-0.050448	0.0193744		0.58671	-0.329754	0.00151836		0.586007	0.029646	0.0074597
0.587504	-0.047973	0.0497369			0.587744	0.646252	0.00867741		0.587425	-0.050489	0.0193714		0.587542	-0.329822	0.00151733		0.586838	0.030473	0.00747364
0.588336	-0.049208	0.0496383			0.588576	0.645333	0.00866353		0.588257	-0.050434	0.0193755		0.588375	-0.329464	0.00152275		0.587669	0.030929	0.00748133
0.589168	-0.050016	0.0495738			0.589409	0.644201	0.00864644		0.589089	-0.050997	0.0193338		0.589207	-0.32897	0.00153023		0.5885	0.031234	0.00748648
0.59	-0.050029	0.0495727			0.590241	0.641931	0.00861216		0.589921	-0.051589	0.0192901		0.590039	-0.328309	0.00154024		0.589332	0.03184	0.00749669
0.590832	-0.049627	0.0496048			0.591074	0.642615	0.00862249		0.590753	-0.050014	0.0194065		0.590871	-0.327654	0.00155015		0.590163	0.031989	0.00749921
0.591664	-0.050533	0.0495325			0.591906	0.643592	0.00863724		0.591585	-0.048321	0.0195317		0.591703	-0.328036	0.00154437		0.590994	0.030947	0.00748164
0.592497	-0.052004	0.0494151			0.592739	0.642848	0.00862601		0.592417	-0.048172	0.0195427		0.592536	-0.32828	0.00154068		0.591825	0.030657	0.00747675
0.593329	-0.05289	0.0493444			0.593571	0.641777	0.00860984		0.593249	-0.049107	0.0194736		0.593368	-0.327114	0.00155833		0.592656	0.029499	0.00745722
0.594161	-0.053728	0.0492775			0.594404	0.641053	0.00859891		0.594081	-0.049221	0.0194652		0.5942	-0.325972	0.00157562		0.593488	0.028124	0.00743404
0.594993	-0.054478	0.0492176			0.595236	0.642312	0.00861792		0.594913	-0.049871	0.0194171		0.595032	-0.325886	0.00157692		0.594319	0.028023	0.00743233
0.595825	-0.055962	0.0490991			0.596069	0.641891	0.00861156		0.595745	-0.051082	0.0193276		0.595864	-0.326113	0.00157348		0.59515	0.028336	0.00743761
0.596657	-0.057083	0.0490097			0.596901	0.642041	0.00861382		0.596577	-0.05048	0.0193721		0.596697	-0.325289	0.00158596		0.595981	0.028063	0.00743301
0.59749	-0.057126	0.0490062			0.597734	0.640901	0.00859661		0.597409	-0.049174	0.0194686		0.597529	-0.324788	0.00159354		0.596812	0.027696	0.00742682
0.598322	-0.057791	0.0489531			0.598566	0.639813	0.00858018		0.598241	-0.048856	0.0194921		0.598361	-0.324313	0.00160073		0.597644	0.027506	0.00742362
0.599154	-0.058313	0.0489115			0.599399	0.639479	0.00857514		0.599073	-0.049059	0.0194771		0.599193	-0.323809	0.00160836		0.598475	0.02768	0.00742655
0.599986	-0.058673	0.0488827			0.600231	0.639989	0.00858284		0.599905	-0.049497	0.0194447		0.600026	-0.324803	0.00159331		0.599306	0.027644	0.00742594
0.600818	-0.060114	0.0487677			0.601064	0.640036	0.00858355		0.600738	-0.049494	0.019445		0.600858	-0.324891	0.00159198		0.600137	0.02742	0.00742217
0.60165	-0.060247	0.0487571			0.601896	0.640344	0.0085882		0.60157	-0.049361	0.0194548		0.60169	-0.323928	0.00160656		0.600969	0.027437	0.00742245
0.602482	-0.060077	0.0487706			0.602729	0.641759	0.00860957		0.602402	-0.050515	0.0193695		0.602522	-0.323717	0.00160976		0.6018	0.027137	0.00741739
0.603315	-0.060845	0.0487093			0.603561	0.642415	0.00861947		0.603234	-0.051789	0.0192753		0.603354	-0.324157	0.00160309		0.602631	0.02688	0.00741306
0.604147	-0.062089	0.04861			0.604394	0.641862	0.00861112		0.604066	-0.052038	0.0192569		0.604187	-0.323923	0.00160664		0.603462	0.026629	0.00740883
0.604979	-0.06271	0.0485605			0.605226	0.641807	0.00861029		0.604898	-0.051878	0.0192687		0.605019	-0.322542	0.00162754		0.604293	0.026406	0.00740507
0.605811	-0.062626	0.0485672			0.606059	0.642972	0.00862788		0.60573	-0.052774	0.0192024		0.605851	-0.320365	0.0016605		0.605125	0.026369	0.00740444
0.606643	-0.063175	0.0485233			0.606891	0.643161	0.00863073		0.606562	-0.054308	0.019089		0.606683	-0.319794	0.00166914		0.605956	0.025583	0.00739119
0.607475	-0.063444	0.0485019			0.607724	0.643551	0.00863662		0.607394	-0.055178	0.0190247		0.607515	-0.31997	0.00166648		0.606787	0.024866	0.0073791
0.608308	-0.062915	0.0485441			0.608556	0.644537	0.00865151		0.608226	-0.055773	0.0189807		0.608348	-0.319937	0.00166698		0.607618	0.025181	0.00738441
0.60914	-0.062686	0.0485624			0.609389	0.645865	0.00867156		0.609058	-0.055873	0.0189733		0.60918	-0.320384	0.00166021		0.60845	0.024005	0.00736458
0.609972	-0.063554	0.0484931			0.610221	0.647554	0.00869706		0.60989	-0.05558	0.018995		0.610012	-0.321846	0.00163808		0.609281	0.022703	0.00734263
0.610804	-0.064971	0.04838			0.611054	0.64954	0.00872705		0.610722	-0.055535	0.0189983		0.610844	-0.322569	0.00162713		0.610112	0.021894	0.00732899
0.611636	-0.065876	0.0483077			0.611886	0.649826	0.00873137		0.611554	-0.056268	0.0189441		0.611677	-0.323302	0.00161604		0.610943	0.021009	0.00731407
0.612468	-0.06505	0.0483737			0.612719	0.649288	0.00872325		0.612386	-0.058413	0.0187855		0.612509	-0.323115	0.00161887		0.611774	0.021485	0.00732209
0.613301	-0.064531	0.0484151			0.613551	0.648932	0.00871787		0.613218	-0.059589	0.0186986		0.613341	-0.321373	0.00164524		0.612606	0.021533	0.0073229
0.614133	-0.065665	0.0483246			0.614384	0.649616	0.0087282		0.61405	-0.059472	0.0187072		0.614173	-0.321017	0.00165063		0.613437	0.021922	0.00732946
0.614965	-0.066006	0.0482974			0.615216	0.650047	0.00873471		0.614882	-0.060011	0.0186673		0.615005	-0.321737	0.00163973		0.614268	0.022881	0.00734563
0.615797	-0.06605	0.0482938			0.616049	0.65005	0.00873475		0.615714	-0.060294	0.0186464		0.615838	-0.321872	0.00163769		0.615099	0.022175	0.00733373
0.616629	-0.066048	0.048294			0.616881	0.650329	0.00873896		0.616546	-0.060112	0.0186599		0.61667	-0.322132	0.00163375		0.61593	0.021231	0.00731781
0.617461	-0.066726	0.0482399			0.617714	0.649896	0.00873243		0.617378	-0.060446	0.0186352		0.617502	-0.322697	0.0016252		0.616762	0.021041	0.00731461
0.618294	-0.067884	0.0481474			0.618546	0.650526	0.00874194		0.61821	-0.060907	0.0186011		0.618334	-0.32186	0.00163787		0.617593	0.021224	0.00731769
0.619126	-0.06901	0.0480576			0.619379	0.650945	0.00874827		0.619043	-0.0616	0.0185499		0.619166	-0.321643	0.00164115		0.618424	0.020856	0.00731149
0.619958	-0.069895	0.0479869			0.620211	0.65038	0.00873973		0.619875	-0.063009	0.0184457		0.619999	-0.321794	0.00163887		0.619255	0.021116	0.00731587
0.62079	-0.069079	0.0480521			0.621044	0.650571	0.00874262		0.620707	-0.063491	0.01841		0.620831	-0.321301	0.00164633		0.620087	0.021965	0.00733019
0.621622	-0.067462	0.0481811			0.621876	0.650476	0.00874118		0.621539	-0.06346	0.0184123		0.621663	-0.320648	0.00165622		0.620918	0.022763	0.00734364
0.622454	-0.067899	0.0481462			0.622709	0.649833	0.00873148		0.622371	-0.063513	0.0184084		0.622495	-0.320676	0.00165579		0.621749	0.023248	0.00735182
0.623286	-0.068984	0.0480596			0.623541	0.648615	0.00871308		0.623203	-0.062671	0.0184707		0.623327	-0.320838	0.00165334		0.62258	0.023058	0.00734862
0.624119	-0.069233	0.0480398			0.624374	0.64803	0.00870425		0.624035	-0.061746	0.0185391		0.62416	-0.320386	0.00166018		0.623411	0.023	0.00734764
0.624951	-0.069743	0.047999			0.625206	0.648095	0.00870523		0.624867	-0.061369	0.0185669		0.624992	-0.319497	0.00167364		0.624243	0.022995	0.00734755
0.625783	-0.069847	0.0479907			0.626039	0.646666	0.00868366		0.625699	-0.0613	0.018572		0.625824	-0.319338	0.00167605		0.625074	0.022915	0.00734621
0.626615	-0.070387	0.0479476			0.626871	0.64469	0.00865382		0.626531	-0.061504	0.018557		0.626656	-0.319945	0.00166686		0.625905	0.022863	0.00734533
0.627447	-0.07217	0.0478053			0.627704	0.644607	0.00865257		0.627363	-0.061051	0.0185905		0.627489	-0.319831	0.00166858		0.626736	0.02365	0.0073586
0.628279	-0.073143	0.0477276			0.628536	0.64452	0.00865125		0.628195	-0.060858	0.0186047		0.628321	-0.31982	0.00166875		0.627567	0.023856	0.00736207
0.629112	-0.073445	0.0477035			0.629369	0.643658	0.00863824		0.629027	-0.060098	0.0186609		0.629153	-0.319009	0.00168103		0.628399	0.02339	0.00735421
0.629944	-0.073546	0.0476955			0.630201	0.642852	0.00862607		0.629859	-0.060128	0.0186587		0.629985	-0.317666	0.00170136		0.62923	0.024205	0.00736796
0.630776	-0.072927	0.0477449			0.631034	0.642479	0.00862044		0.630691	-0.061523	0.0185556		0.630817	-0.316997	0.00171149		0.630061	0.024507	0.00737305
0.631608	-0.071811	0.047834			0.631866	0.642108	0.00861483		0.631523	-0.062209	0.0185048		0.63165	-0.316306	0.00172195		0.630892	0.02379	0.00736096
0.63244	-0.071334	0.047872			0.632699	0.641581	0.00860688		0.632355	-0.063377	0.0184185		0.632482	-0.31506	0.00174081		0.631724	0.023217	0.0073513
0.633272	-0.073234	0.0477204			0.633531	0.640501	0.00859057		0.633187	-0.062951	0.01845		0.633314	-0.31371	0.00176125		0.632555	0.022861	0.00734529
0.634104	-0.075435	0.0475447			0.634364	0.640838	0.00859566		0.634019	-0.062761	0.018464		0.634146	-0.312944	0.00177284		0.633386	0.022935	0.00734654
0.634937	-0.07581	0.0475147			0.635196	0.640705	0.00859365		0.634851	-0.063679	0.0183961		0.634978	-0.312067	0.00178612		0.634217	0.022125	0.00733288
0.635769	-0.075972	0.0475018			0.636029	0.64087	0.00859614		0.635683	-0.063854	0.0183832		0.635811	-0.310019	0.00181712		0.635048	0.021221	0.00731764
0.636601	-0.077832	0.0473533			0.636861	0.639505	0.00857553		0.636515	-0.064267	0.0183527		0.636643	-0.307697	0.00185227		0.63588	0.021175	0.00731687
0.637433	-0.079286	0.0472373			0.637694	0.638755	0.00856421		0.637348	-0.064862	0.0183087		0.637475	-0.306402	0.00187188		0.636711	0.021376	0.00732026
0.638265	-0.07993	0.0471859			0.638526	0.637941	0.00855192		0.63818	-0.065241	0.0182806		0.638307	-0.304787	0.00189633		0.637542	0.020736	0.00730946
0.639097	-0.080996	0.0471008			0.639359	0.636777	0.00853434		0.639012	-0.064572	0.0183301		0.63914	-0.304151	0.00190596		0.638373	0.020151	0.0072996
0.63993	-0.082373	0.0469908			0.640191	0.635577	0.00851622		0.639844	-0.062993	0.0184469		0.639972	-0.304309	0.00190356		0.639204	0.019894	0.00729527
0.640762	-0.084021	0.0468593			0.641024	0.63646	0.00852956		0.640676	-0.061364	0.0185673		0.640804	-0.303622	0.00191396		0.640036	0.018534	0.00727233
0.641594	-0.085867	0.0467119			0.641856	0.635775	0.00851921		0.641508	-0.060319	0.0186446		0.641636	-0.302433	0.00193196		0.640867	0.017098	0.00724812
0.642426	-0.088014	0.0465405			0.642689	0.636139	0.00852471		0.64234	-0.060474	0.0186331		0.642468	-0.300957	0.00195431		0.641698	0.015401	0.00721951
0.643258	-0.089621	0.0464123			0.643521	0.637044	0.00853837		0.643172	-0.059693	0.0186909		0.643301	-0.300356	0.00196341		0.642529	0.013612	0.00718934
0.64409	-0.089494	0.0464224			0.644354	0.636692	0.00853306		0.644004	-0.059504	0.0187048		0.644133	-0.298838	0.00198639		0.643361	0.012236	0.00716614
0.644923	-0.089676	0.0464079			0.645186	0.6352	0.00851053		0.644836	-0.060174	0.0186553		0.644965	-0.298001	0.00199906		0.644192	0.011315	0.00715061
0.645755	-0.090987	0.0463032			0.646019	0.634606	0.00850156		0.645668	-0.060817	0.0186078		0.645797	-0.297116	0.00201246		0.645023	0.011523	0.00715412
0.646587	-0.092738	0.0461634			0.646851	0.635423	0.0085139		0.6465	-0.060859	0.0186046		0.646629	-0.295511	0.00203675		0.645854	0.011361	0.00715139
0.647419	-0.093129	0.0461322			0.647684	0.635392	0.00851343		0.647332	-0.060035	0.0186656		0.647462	-0.294076	0.00205848		0.646685	0.010712	0.00714044
0.648251	-0.092984	0.0461438			0.648516	0.635237	0.00851109		0.648164	-0.059304	0.0187196		0.648294	-0.292262	0.00208594		0.647517	0.010764	0.00714132
0.649083	-0.0953	0.0459589			0.649349	0.635244	0.00851119		0.648996	-0.05846	0.018782		0.649126	-0.290054	0.00211936		0.648348	0.010641	0.00713925
0.649916	-0.098171	0.0457297			0.650181	0.636193	0.00852552		0.649828	-0.058371	0.0187886		0.649958	-0.289193	0.0021324		0.649179	0.010416	0.00713545
0.650748	-0.100354	0.0455555			0.651014	0.636539	0.00853075		0.65066	-0.05858	0.0187732		0.650791	-0.288649	0.00214063		0.65001	0.010357	0.00713446
0.65158	-0.102125	0.0454141			0.651846	0.635972	0.00852219		0.651492	-0.057543	0.0188498		0.651623	-0.286022	0.0021804		0.650841	0.009987	0.00712822
0.652412	-0.104244	0.0452449			0.652679	0.63566	0.00851748		0.652324	-0.056532	0.0189246		0.652455	-0.28335	0.00222085		0.651673	0.009941	0.00712744
0.653244	-0.105253	0.0451644			0.653511	0.636142	0.00852475		0.653156	-0.056035	0.0189613		0.653287	-0.281923	0.00224245		0.652504	0.009939	0.00712741
0.654076	-0.104903	0.0451923			0.654344	0.636801	0.0085347		0.653988	-0.055642	0.0189904		0.654119	-0.280619	0.0022622		0.653335	0.00888	0.00710955
0.654908	-0.105424	0.0451508			0.655176	0.636098	0.00852409		0.654821	-0.055501	0.0190008		0.654952	-0.279467	0.00227963		0.654166	0.008509	0.0071033
0.655741	-0.107009	0.0450242			0.656009	0.634529	0.0085004		0.655653	-0.055994	0.0189644		0.655784	-0.278145	0.00229965		0.654998	0.008986	0.00711134
0.656573	-0.107916	0.0449518			0.656841	0.633344	0.00848251		0.656485	-0.056117	0.0189553		0.656616	-0.278056	0.002301		0.655829	0.009599	0.00712168
0.657405	-0.10766	0.0449723			0.657674	0.634008	0.00849253		0.657317	-0.05601	0.0189632		0.657448	-0.278012	0.00230166		0.65666	0.009782	0.00712476
0.658237	-0.107424	0.0449911			0.658506	0.63473	0.00850343		0.658149	-0.055155	0.0190264		0.65828	-0.27693	0.00231804		0.657491	0.009464	0.0071194
0.659069	-0.108239	0.044926			0.659339	0.634239	0.00849602		0.658981	-0.055024	0.0190361		0.659113	-0.27707	0.00231592		0.658322	0.009539	0.00712067
0.659901	-0.10876	0.0448844			0.660171	0.634394	0.00849836		0.659813	-0.055616	0.0189923		0.659945	-0.276595	0.00232311		0.659154	0.009787	0.00712485
0.660734	-0.108471	0.0449075			0.661004	0.63476	0.00850389		0.660645	-0.056091	0.0189572		0.660777	-0.275198	0.00234426		0.659985	0.010061	0.00712947
0.661566	-0.108256	0.0449247			0.661836	0.634135	0.00849445		0.661477	-0.056213	0.0189482		0.661609	-0.273921	0.00236359		0.660816	0.011162	0.00714803
0.662398	-0.108152	0.044933			0.662669	0.633598	0.00848634		0.662309	-0.057074	0.0188845		0.662442	-0.272997	0.00237758		0.661647	0.011787	0.00715857
0.66323	-0.107982	0.0449466			0.663501	0.632919	0.00847609		0.663141	-0.057292	0.0188684		0.663274	-0.272072	0.00239158		0.662479	0.011546	0.00715451
0.664062	-0.108159	0.0449324			0.664334	0.632109	0.00846386		0.663973	-0.057592	0.0188462		0.664106	-0.271408	0.00240164		0.66331	0.012452	0.00716978
0.664894	-0.108904	0.044873			0.665166	0.632367	0.00846775		0.664805	-0.057807	0.0188303		0.664938	-0.271587	0.00239893		0.664141	0.014426	0.00720307
0.665727	-0.10915	0.0448533			0.665999	0.63342	0.00848365		0.665637	-0.057629	0.0188435		0.66577	-0.271039	0.00240722		0.664972	0.015428	0.00721996
0.666559	-0.109059	0.0448606			0.666831	0.634631	0.00850194		0.666469	-0.057258	0.0188709		0.666603	-0.270432	0.00241641		0.665803	0.015298	0.00721777
0.667391	-0.108967	0.0448679			0.667664	0.63413	0.00849437		0.667301	-0.057338	0.018865		0.667435	-0.269807	0.00242587		0.666635	0.014784	0.0072091
0.668223	-0.110386	0.0447547			0.668496	0.633319	0.00848213		0.668133	-0.05852	0.0187776		0.668267	-0.269365	0.00243256		0.667466	0.014525	0.00720474
0.669055	-0.110973	0.0447078			0.669329	0.633054	0.00847813		0.668965	-0.059295	0.0187203		0.669099	-0.268661	0.00244322		0.668297	0.013733	0.00719138
0.669887	-0.109768	0.044804			0.670161	0.63198	0.00846191		0.669797	-0.060166	0.0186559		0.669931	-0.268362	0.00244775		0.669128	0.012923	0.00717773
0.670719	-0.109015	0.0448641			0.670994	0.631032	0.0084476		0.670629	-0.060786	0.01861		0.670764	-0.267812	0.00245607		0.669959	0.01351	0.00718762
0.671552	-0.109491	0.0448261			0.671826	0.630929	0.00844604		0.671461	-0.059922	0.0186739		0.671596	-0.266496	0.002476		0.670791	0.012656	0.00717322
0.672384	-0.109931	0.044791			0.672659	0.63126	0.00845104		0.672293	-0.05867	0.0187665		0.672428	-0.26615	0.00248123		0.671622	0.012304	0.00716729
0.673216	-0.10986	0.0447966			0.673491	0.63164	0.00845678		0.673126	-0.059166	0.0187298		0.67326	-0.265819	0.00248625		0.672453	0.012634	0.00717285
0.674048	-0.110598	0.0447377			0.674324	0.631191	0.00845		0.673958	-0.059255	0.0187232		0.674093	-0.265072	0.00249755		0.673284	0.013034	0.0071796
0.67488	-0.11102	0.044704			0.675156	0.631432	0.00845364		0.67479	-0.059532	0.0187028		0.674925	-0.26436	0.00250833		0.674115	0.013932	0.00719474
0.675712	-0.111168	0.0446922			0.675989	0.632958	0.00847668		0.675622	-0.059883	0.0186768		0.675757	-0.262666	0.00253398		0.674947	0.014375	0.00720221
0.676545	-0.111328	0.0446795			0.676821	0.634942	0.00850663		0.676454	-0.059183	0.0187286		0.676589	-0.262504	0.00253643		0.675778	0.014358	0.00720192
0.677377	-0.112326	0.0445998			0.677654	0.63574	0.00851868		0.677286	-0.058625	0.0187698		0.677421	-0.261073	0.00255809		0.676609	0.015173	0.00721566
0.678209	-0.113416	0.0445128			0.678486	0.635073	0.00850861		0.678118	-0.058127	0.0188067		0.678254	-0.259612	0.00258021		0.67744	0.015405	0.00721958
0.679041	-0.114153	0.0444539			0.679319	0.6352	0.00851053		0.67895	-0.058865	0.0187521		0.679086	-0.258985	0.0025897		0.678272	0.016424	0.00723676
0.679873	-0.114869	0.0443968			0.680151	0.636182	0.00852536		0.679782	-0.060207	0.0186529		0.679918	-0.257559	0.00261129		0.679103	0.017174	0.0072494
0.680705	-0.115418	0.044353			0.680984	0.636091	0.00852398		0.680614	-0.059927	0.0186736		0.68075	-0.255185	0.00264723		0.679934	0.017462	0.00725426
0.681538	-0.116956	0.0442302			0.681816	0.635833	0.00852009		0.681446	-0.060037	0.0186654		0.681582	-0.253682	0.00266998		0.680765	0.017188	0.00724964
0.68237	-0.118341	0.0441196			0.682649	0.635604	0.00851663		0.682278	-0.061743	0.0185393		0.682415	-0.252293	0.00269101		0.681596	0.016134	0.00723187
0.683202	-0.119552	0.044023			0.683481	0.635183	0.00851027		0.68311	-0.06035	0.0186423		0.683247	-0.250585	0.00271687		0.682428	0.015619	0.00722318
0.684034	-0.120272	0.0439655			0.684314	0.634953	0.0085068		0.683942	-0.059273	0.0187219		0.684079	-0.249982	0.00272599		0.683259	0.015654	0.00722377
0.684866	-0.120212	0.0439703			0.685146	0.635066	0.00850851		0.684774	-0.058754	0.0187603		0.684911	-0.24927	0.00273677		0.68409	0.015627	0.00722332
0.685698	-0.120917	0.043914			0.685979	0.635117	0.00850928		0.685606	-0.059048	0.0187386		0.685744	-0.247125	0.00276925		0.684921	0.014499	0.0072043
0.68653	-0.121829	0.0438412			0.686811	0.635318	0.00851231		0.686438	-0.058848	0.0187533		0.686576	-0.245223	0.00279804		0.685753	0.013586	0.0071889
0.687363	-0.122227	0.0438094			0.687644	0.6345	0.00849996		0.68727	-0.058842	0.0187538		0.687408	-0.244662	0.00280653		0.686584	0.013093	0.00718059
0.688195	-0.122249	0.0438077			0.688476	0.635004	0.00850757		0.688102	-0.058975	0.018744		0.68824	-0.244612	0.00280729		0.687415	0.011798	0.00715876
0.689027	-0.123121	0.0437381			0.689309	0.635873	0.00852069		0.688934	-0.057735	0.0188356		0.689072	-0.243761	0.00282017		0.688246	0.011422	0.00715242
0.689859	-0.123595	0.0437002			0.690141	0.635386	0.00851334		0.689766	-0.058617	0.0187704		0.689905	-0.241976	0.00284719		0.689077	0.011656	0.00715636
0.690691	-0.124305	0.0436435			0.690974	0.635908	0.00852122		0.690598	-0.059644	0.0186945		0.690737	-0.240493	0.00286964		0.689909	0.012873	0.00717688
0.691523	-0.12472	0.0436104			0.691806	0.635317	0.0085123		0.691431	-0.059227	0.0187253		0.691569	-0.237426	0.00291607		0.69074	0.012798	0.00717562
0.692356	-0.125529	0.0435458			0.692639	0.634464	0.00849942		0.692263	-0.059238	0.0187245		0.692401	-0.235859	0.0029398		0.691571	0.012469	0.00717007
0.693188	-0.126958	0.0434318			0.693471	0.633791	0.00848926		0.693095	-0.060142	0.0186577		0.693233	-0.235136	0.00295074		0.692402	0.012801	0.00717567
0.69402	-0.128564	0.0433036			0.694304	0.633731	0.00848835		0.693927	-0.060609	0.0186231		0.694066	-0.234094	0.00296652		0.693233	0.012821	0.00717601
0.694852	-0.129961	0.043192			0.695136	0.634272	0.00849652		0.694759	-0.060901	0.0186015		0.694898	-0.233498	0.00297554		0.694065	0.012839	0.00717631
0.695684	-0.131361	0.0430803			0.695969	0.633673	0.00848747		0.695591	-0.061992	0.0185209		0.69573	-0.233126	0.00298117		0.694896	0.012589	0.00717209
0.696516	-0.132514	0.0429882			0.696801	0.632906	0.00847589		0.696423	-0.060956	0.0185975		0.696562	-0.234009	0.0029678		0.695727	0.012646	0.00717305
0.697349	-0.13332	0.0429239			0.697634	0.631838	0.00845977		0.697255	-0.060948	0.0185981		0.697394	-0.233578	0.00297433		0.696558	0.012858	0.00717663
0.698181	-0.134123	0.0428598			0.698466	0.630635	0.0084416		0.698087	-0.061154	0.0185828		0.698227	-0.232882	0.00298486		0.69739	0.01255	0.00717144
0.699013	-0.134515	0.0428285			0.699299	0.630706	0.00844268		0.698919	-0.061424	0.0185629		0.699059	-0.231141	0.00301122		0.698221	0.01179	0.00715862
0.699845	-0.136083	0.0427033			0.700131	0.630067	0.00843303		0.699751	-0.0614	0.0185646		0.699891	-0.230061	0.00302757		0.699052	0.010631	0.00713908
0.700677	-0.137322	0.0426044			0.700964	0.630586	0.00844086		0.700583	-0.059971	0.0186703		0.700723	-0.22965	0.00303379		0.699883	0.008851	0.00710907
0.701509	-0.137909	0.0425576			0.701796	0.63133	0.0084521		0.701415	-0.061483	0.0185585		0.701556	-0.228456	0.00305187		0.700714	0.008218	0.00709839
0.702341	-0.137912	0.0425573			0.702629	0.631722	0.00845802		0.702247	-0.062287	0.0184991		0.702388	-0.227532	0.00306585		0.701546	0.008713	0.00710674
0.703174	-0.138041	0.042547			0.703461	0.631998	0.00846218		0.703079	-0.061191	0.0185801		0.70322	-0.226367	0.00308349		0.702377	0.009525	0.00712043
0.704006	-0.13977	0.042409			0.704294	0.632069	0.00846326		0.703911	-0.061901	0.0185276		0.704052	-0.225361	0.00309872		0.703208	0.009774	0.00712463
0.704838	-0.141624	0.042261			0.705126	0.6324	0.00846825		0.704743	-0.060993	0.0185947		0.704884	-0.223878	0.00312117		0.704039	0.009792	0.00712493
0.70567	-0.143108	0.0421426			0.705959	0.632552	0.00847055		0.705575	-0.061744	0.0185392		0.705717	-0.222871	0.00313641		0.70487	0.009614	0.00712193
0.706502	-0.143866	0.0420821			0.706791	0.632363	0.00846769		0.706407	-0.061958	0.0185234		0.706549	-0.223132	0.00313246		0.705702	0.010048	0.00712925
0.707334	-0.145468	0.0419542			0.707624	0.632752	0.00847357		0.707239	-0.061731	0.0185402		0.707381	-0.222816	0.00313725		0.706533	0.010665	0.00713965
0.708167	-0.147376	0.0418019			0.708456	0.633084	0.00847858		0.708071	-0.061933	0.0185252		0.708213	-0.222076	0.00314845		0.707364	0.0106	0.00713856
0.708999	-0.1486	0.0417042			0.709289	0.633276	0.00848148		0.708903	-0.062429	0.0184886		0.709045	-0.220436	0.00317328		0.708195	0.010278	0.00713313
0.709831	-0.148695	0.0416966			0.710121	0.633177	0.00847998		0.709736	-0.061877	0.0185294		0.709878	-0.219101	0.00319349		0.709027	0.009891	0.0071266
0.710663	-0.148149	0.0417402			0.710954	0.633525	0.00848524		0.710568	-0.060851	0.0186052		0.71071	-0.217943	0.00321102		0.709858	0.009655	0.00712262
0.711495	-0.148452	0.041716			0.711786	0.633967	0.00849191		0.7114	-0.058928	0.0187474		0.711542	-0.21754	0.00321712		0.710689	0.008734	0.00710709
0.712327	-0.149384	0.0416416			0.712619	0.633969	0.00849194		0.712232	-0.059064	0.0187374		0.712374	-0.218146	0.00320794		0.71152	0.008185	0.00709784
0.71316	-0.150147	0.0415807			0.713451	0.633944	0.00849157		0.713064	-0.058996	0.0187424		0.713207	-0.217572	0.00321663		0.712351	0.009848	0.00712588
0.713992	-0.150293	0.041569			0.714284	0.633911	0.00849107		0.713896	-0.060132	0.0186584		0.714039	-0.216384	0.00323462		0.713183	0.009572	0.00712122
0.714824	-0.150177	0.0415783			0.715116	0.633076	0.00847846		0.714728	-0.060026	0.0186662		0.714871	-0.215307	0.00325092		0.714014	0.009877	0.00712637
0.715656	-0.149292	0.0416489			0.715949	0.632655	0.0084721		0.71556	-0.059994	0.0186686		0.715703	-0.213641	0.00327614		0.714845	0.010534	0.00713744
0.716488	-0.148862	0.0416832			0.716781	0.632446	0.00846895		0.716392	-0.060249	0.0186498		0.716535	-0.211723	0.00330518		0.715676	0.010494	0.00713677
0.71732	-0.148864	0.0416831			0.717614	0.632085	0.0084635		0.717224	-0.060813	0.018608		0.717368	-0.209326	0.00334147		0.716507	0.009283	0.00711635
0.718152	-0.148358	0.0417235			0.718446	0.631992	0.00846209		0.718056	-0.060967	0.0185967		0.7182	-0.207703	0.00336604		0.717339	0.007671	0.00708917
0.718985	-0.148412	0.0417192			0.719279	0.63268	0.00847248		0.718888	-0.060822	0.0186074		0.719032	-0.207355	0.0033713		0.71817	0.006046	0.00706177
0.719817	-0.14867	0.0416986			0.720111	0.633481	0.00848458		0.71972	-0.061247	0.018576		0.719864	-0.207265	0.00337267		0.719001	0.005148	0.00704663
0.720649	-0.147919	0.0417585			0.720944	0.633604	0.00848643		0.720552	-0.061162	0.0185822		0.720696	-0.206138	0.00338973		0.719832	0.005519	0.00705288
0.721481	-0.147962	0.0417551			0.721776	0.632121	0.00846404		0.721384	-0.061071	0.018589		0.721529	-0.204682	0.00341177		0.720664	0.006601	0.00707113
0.722313	-0.148764	0.0416911			0.722609	0.630562	0.0084405		0.722216	-0.06052	0.0186297		0.722361	-0.203242	0.00343357		0.721495	0.00517	0.007047
0.723145	-0.149036	0.0416694			0.723441	0.630691	0.00844245		0.723048	-0.061148	0.0185833		0.723193	-0.201343	0.00346232		0.722326	0.003458	0.00701813
0.723978	-0.148641	0.0417009			0.724274	0.630528	0.00843999		0.72388	-0.061542	0.0185541		0.724025	-0.200096	0.00348119		0.723157	0.002568	0.00700312
0.72481	-0.147621	0.0417823			0.725106	0.630422	0.00843839		0.724712	-0.062822	0.0184595		0.724858	-0.199645	0.00348802		0.723988	0.002796	0.00700697
0.725642	-0.14761	0.0417832			0.725939	0.630531	0.00844003		0.725544	-0.066439	0.0181921		0.72569	-0.198719	0.00350204		0.72482	0.002007	0.00699367
0.726474	-0.148257	0.0417315			0.726771	0.629922	0.00843084		0.726376	-0.067528	0.0181115		0.726522	-0.196182	0.00354045		0.725651	0.00213	0.00699574
0.727306	-0.148813	0.0416872			0.727604	0.628331	0.00840681		0.727209	-0.067863	0.0180868		0.727354	-0.193555	0.00358022		0.726482	0.002941	0.00700941
0.728138	-0.147855	0.0417636			0.728436	0.626586	0.00838047		0.728041	-0.068339	0.0180516		0.728186	-0.192762	0.00359222		0.727313	0.003058	0.00701139
0.728971	-0.147258	0.0418113			0.729269	0.625399	0.00836254		0.728873	-0.068515	0.0180386		0.729019	-0.189911	0.00363538		0.728144	0.002959	0.00700972
0.729803	-0.147708	0.0417754			0.730101	0.624913	0.00835521		0.729705	-0.068684	0.0180261		0.729851	-0.188189	0.00366145		0.728976	0.003083	0.00701181
0.730635	-0.148356	0.0417236			0.730934	0.623932	0.00834039		0.730537	-0.070416	0.017898		0.730683	-0.186657	0.00368464		0.729807	0.003415	0.00701741
0.731467	-0.149642	0.041621			0.731766	0.623185	0.00832911		0.731369	-0.071441	0.0178222		0.731515	-0.186152	0.00369229		0.730638	0.003186	0.00701355
0.732299	-0.149803	0.0416081			0.732599	0.622412	0.00831744		0.732201	-0.072656	0.0177324		0.732347	-0.184426	0.00371842		0.731469	0.003679	0.00702186
0.733131	-0.1499	0.0416004			0.733431	0.621833	0.0083087		0.733033	-0.071836	0.017793		0.73318	-0.182895	0.00374159		0.732301	0.00359	0.00702036
0.733963	-0.149037	0.0416693			0.734264	0.62177	0.00830775		0.733865	-0.073309	0.0176841		0.734012	-0.181511	0.00376254		0.733132	0.001429	0.00698392
0.734796	-0.148712	0.0416952			0.735096	0.621309	0.00830079		0.734697	-0.07319	0.0176929		0.734844	-0.180932	0.00377131		0.733963	0.00068	0.00697129
0.735628	-0.148815	0.041687			0.735929	0.621371	0.00830173		0.735529	-0.072967	0.0177094		0.735676	-0.179643	0.00379082		0.734794	-0.001177	0.00693998
0.73646	-0.150138	0.0415814			0.736761	0.621081	0.00829735		0.736361	-0.07322	0.0176907		0.736508	-0.178547	0.00380741		0.735625	-0.000641	0.00694902
0.737292	-0.152078	0.0414265			0.737594	0.62082	0.00829341		0.737193	-0.074084	0.0176268		0.737341	-0.177731	0.00381977		0.736457	0.000608	0.00697008
0.738124	-0.153442	0.0413176			0.738426	0.620294	0.00828546		0.738025	-0.07488	0.0175679		0.738173	-0.176955	0.00383152		0.737288	0.001985	0.00699329
0.738956	-0.154462	0.0412362			0.739259	0.619523	0.00827382		0.738857	-0.075993	0.0174856		0.739005	-0.175691	0.00385065		0.738119	0.003505	0.00701892
0.739789	-0.156514	0.0410724			0.740091	0.618962	0.00826535		0.739689	-0.077013	0.0174102		0.739837	-0.173522	0.00388349		0.73895	0.003561	0.00701987
0.740621	-0.15678	0.0410512			0.740924	0.618328	0.00825578		0.740521	-0.076808	0.0174254		0.74067	-0.171928	0.00390762		0.739781	0.00365	0.00702137
0.741453	-0.157634	0.040983			0.741756	0.61775	0.00824705		0.741353	-0.076749	0.0174298		0.741502	-0.170918	0.00392291		0.740613	0.002802	0.00700707
0.742285	-0.158823	0.0408881			0.742589	0.618041	0.00825145		0.742185	-0.077349	0.0173854		0.742334	-0.169549	0.00394363		0.741444	0.002783	0.00700675
0.743117	-0.159304	0.0408497			0.743421	0.618258	0.00825472		0.743017	-0.077537	0.0173715		0.743166	-0.169536	0.00394383		0.742275	0.003503	0.00701889
0.743949	-0.160568	0.0407488			0.744254	0.618071	0.0082519		0.743849	-0.07616	0.0174733		0.743998	-0.169957	0.00393745		0.743106	0.003307	0.00701559
0.744782	-0.162056	0.04063			0.745086	0.618021	0.00825114		0.744682	-0.077954	0.0173407		0.744831	-0.169422	0.00394555		0.743938	0.002992	0.00701027
0.745614	-0.162308	0.0406099			0.745919	0.617449	0.00824251		0.745514	-0.077924	0.0173429		0.745663	-0.168549	0.00395877		0.744769	0.002408	0.00700043
0.746446	-0.162141	0.0406232			0.746751	0.616387	0.00822647		0.746346	-0.075964	0.0174878		0.746495	-0.168433	0.00396053		0.7456	0.002726	0.00700579
0.747278	-0.162482	0.040596			0.747584	0.615988	0.00822045		0.747178	-0.074603	0.0175884		0.747327	-0.168362	0.0039616		0.746431	0.002492	0.00700184
0.74811	-0.162764	0.0405735			0.748416	0.616216	0.00822389		0.74801	-0.073354	0.0176808		0.748159	-0.167365	0.00397669		0.747262	0.001348	0.00698255
0.748942	-0.163981	0.0404763			0.749249	0.616996	0.00823567		0.748842	-0.072554	0.0177399		0.748992	-0.165453	0.00400564		0.748094	0.000924	0.0069754
0.749774	-0.165569	0.0403496			0.750081	0.617676	0.00824593		0.749674	-0.073026	0.017705		0.749824	-0.165227	0.00400906		0.748925	0.001118	0.00697868
0.750607	-0.165151	0.0403829			0.750914	0.617383	0.00824151		0.750506	-0.072764	0.0177244		0.750656	-0.165332	0.00400747		0.749756	0.002968	0.00700987
0.751439	-0.166295	0.0402916			0.751746	0.618242	0.00825448		0.751338	-0.073287	0.0176857		0.751488	-0.164201	0.00402459		0.750587	0.003543	0.00701956
0.752271	-0.16722	0.0402178			0.752578	0.618914	0.00826463		0.75217	-0.07392	0.0176389		0.752321	-0.162772	0.00404623		0.751419	0.004171	0.00703015
0.753103	-0.167784	0.0401728			0.753411	0.619745	0.00827717		0.753002	-0.074567	0.0175911		0.753153	-0.162485	0.00405057		0.75225	0.003524	0.00701924
0.753935	-0.169331	0.0400493			0.754243	0.620606	0.00829017		0.753834	-0.075126	0.0175498		0.753985	-0.161678	0.00406279		0.753081	0.003511	0.00701903
0.754767	-0.170407	0.0399634			0.755076	0.620727	0.008292		0.754666	-0.074056	0.0176289		0.754817	-0.162158	0.00405552		0.753912	0.003622	0.0070209
0.7556	-0.171691	0.0398609			0.755908	0.620962	0.00829555		0.755498	-0.073419	0.017676		0.755649	-0.161359	0.00406762		0.754743	0.003024	0.00701081
0.756432	-0.173538	0.0397134			0.756741	0.620976	0.00829576		0.75633	-0.073251	0.0176884		0.756482	-0.16077	0.00407653		0.755575	0.004147	0.00702975
0.757264	-0.174779	0.0396144			0.757573	0.620683	0.00829134		0.757162	-0.073658	0.0176583		0.757314	-0.160179	0.00408548		0.756406	0.002922	0.00700909
0.758096	-0.174589	0.0396295			0.758406	0.620703	0.00829164		0.757994	-0.072202	0.017766		0.758146	-0.160361	0.00408272		0.757237	0.002087	0.00699501
0.758928	-0.175566	0.0395515			0.759238	0.620949	0.00829535		0.758826	-0.072476	0.0177457		0.758978	-0.160759	0.0040767		0.758068	0.001062	0.00697773
0.75976	-0.176225	0.0394989			0.760071	0.620849	0.00829384		0.759658	-0.072275	0.0177606		0.75981	-0.160764	0.00407662		0.758899	0.000492	0.00696812
0.760593	-0.176162	0.039504			0.760903	0.62011	0.00828269		0.76049	-0.072183	0.0177674		0.760643	-0.159808	0.0040911		0.759731	0.00115	0.00697922
0.761425	-0.177624	0.0393873			0.761736	0.619104	0.0082675		0.761322	-0.073252	0.0176883		0.761475	-0.159246	0.0040996		0.760562	0.00094	0.00697567
0.762257	-0.179105	0.039269			0.762568	0.618751	0.00826217		0.762154	-0.074143	0.0176224		0.762307	-0.159458	0.00409639		0.761393	0.000539	0.00696891
0.763089	-0.179593	0.0392301			0.763401	0.618811	0.00826307		0.762987	-0.073526	0.0176681		0.763139	-0.159658	0.00409337		0.762224	-0.000465	0.00695198
0.763921	-0.180936	0.0391229			0.764233	0.618514	0.00825859		0.763819	-0.074182	0.0176196		0.763972	-0.158839	0.00410576		0.763056	0.000682	0.00697132
0.764753	-0.181662	0.0390649			0.765066	0.617989	0.00825066		0.764651	-0.074135	0.017623		0.764804	-0.157686	0.00412322		0.763887	0.00151	0.00698529
0.765585	-0.181496	0.0390782			0.765898	0.617152	0.00823802		0.765483	-0.072302	0.0177586		0.765636	-0.15734	0.00412846		0.764718	0.001409	0.00698358
0.766418	-0.182963	0.0389611			0.766731	0.617269	0.00823979		0.766315	-0.072388	0.0177522		0.766468	-0.156707	0.00413804		0.765549	0.001022	0.00697706
0.76725	-0.184581	0.0388319			0.767564	0.617966	0.00825031		0.767147	-0.072844	0.0177185		0.7673	-0.155389	0.00415799		0.76638	0.000902	0.00697503
0.768082	-0.185069	0.038793			0.768396	0.618986	0.00826571		0.767979	-0.073467	0.0176724		0.768133	-0.155669	0.00415375		0.767212	0.001092	0.00697824
0.768914	-0.184996	0.0387988			0.769229	0.619915	0.00827974		0.768811	-0.07373	0.017653		0.768965	-0.155634	0.00415428		0.768043	0.001181	0.00697974
0.769746	-0.184897	0.0388067			0.770061	0.619475	0.0082731		0.769643	-0.073729	0.017653		0.769797	-0.155517	0.00415606		0.768874	0.000605	0.00697003
0.770578	-0.184443	0.0388429			0.770894	0.618054	0.00825164		0.770475	-0.072962	0.0177098		0.770629	-0.155208	0.00416073		0.769705	-0.000139	0.00695748
0.771411	-0.185076	0.0387924			0.771726	0.617516	0.00824352		0.771307	-0.073325	0.0176829		0.771461	-0.153745	0.00418288		0.770536	-0.002548	0.00691686
0.772243	-0.18532	0.0387729			0.772559	0.617327	0.00824066		0.772139	-0.072227	0.0177641		0.772294	-0.153865	0.00418106		0.771368	-0.00365	0.00689828
0.773075	-0.185492	0.0387592			0.773391	0.616598	0.00822966		0.772971	-0.071431	0.017823		0.773126	-0.154368	0.00417345		0.772199	-0.00543	0.00686827
0.773907	-0.186073	0.0387128			0.774224	0.615332	0.00821054		0.773803	-0.07048	0.0178933		0.773958	-0.154098	0.00417754		0.77303	-0.006028	0.00685818
0.774739	-0.1863	0.0386947			0.775056	0.61389	0.00818877		0.774635	-0.071192	0.0178406		0.77479	-0.153592	0.0041852		0.773861	-0.006662	0.00684749
0.775571	-0.186903	0.0386466			0.775889	0.61367	0.00818545		0.775467	-0.072321	0.0177572		0.775622	-0.152137	0.00420722		0.774693	-0.00635	0.00685275
0.776404	-0.1868	0.0386548			0.776721	0.614024	0.00819079		0.776299	-0.073882	0.0176417		0.776455	-0.151973	0.00420971		0.775524	-0.004567	0.00688282
0.777236	-0.186627	0.0386686			0.777553	0.61398	0.00819013		0.777131	-0.07441	0.0176027		0.777287	-0.152072	0.00420821		0.776355	-0.004399	0.00688565
0.778068	-0.187141	0.0386276			0.778386	0.614081	0.00819165		0.777963	-0.07394	0.0176374		0.778119	-0.151617	0.0042151		0.777186	-0.004596	0.00688233
0.7789	-0.188158	0.0385464			0.779218	0.614388	0.00819629		0.778795	-0.073757	0.017651		0.778951	-0.150142	0.00423742		0.778017	-0.005064	0.00687444
0.779732	-0.188422	0.0385253			0.780051	0.613724	0.00818626		0.779627	-0.072825	0.0177199		0.779784	-0.148638	0.00426019		0.778849	-0.005292	0.00687059
0.780564	-0.188981	0.0384807			0.780883	0.613112	0.00817702		0.78046	-0.071828	0.0177936		0.780616	-0.148317	0.00426505		0.77968	-0.003971	0.00689287
0.781397	-0.188841	0.0384919			0.781716	0.613435	0.0081819		0.781292	-0.071247	0.0178366		0.781448	-0.148366	0.00426431		0.780511	-0.004227	0.00688855
0.782229	-0.188578	0.0385128			0.782548	0.613786	0.0081872		0.782124	-0.070088	0.0179223		0.78228	-0.147526	0.00427703		0.781342	-0.003495	0.00690089
0.783061	-0.189207	0.0384626			0.783381	0.613925	0.0081893		0.782956	-0.069814	0.0179425		0.783112	-0.145998	0.00430016		0.782173	-0.003367	0.00690305
0.783893	-0.18943	0.0384448			0.784213	0.614567	0.00819899		0.783788	-0.069983	0.01793		0.783945	-0.14477	0.00431875		0.783005	-0.002742	0.00691359
0.784725	-0.189274	0.0384573			0.785046	0.615345	0.00821074		0.78462	-0.070263	0.0179093		0.784777	-0.144248	0.00432665		0.783836	-0.004543	0.00688322
0.785557	-0.189916	0.038406			0.785878	0.615531	0.00821355		0.785452	-0.070606	0.017884		0.785609	-0.143425	0.00433911		0.784667	-0.00512	0.00687349
0.786389	-0.191896	0.038248			0.786711	0.615264	0.00820951		0.786284	-0.071097	0.0178477		0.786441	-0.143758	0.00433407		0.785498	-0.003712	0.00689723
0.787222	-0.191173	0.0383057			0.787543	0.614792	0.00820239		0.787116	-0.070652	0.0178806		0.787273	-0.143071	0.00434447		0.78633	-0.004374	0.00688607
0.788054	-0.190362	0.0383704			0.788376	0.6142	0.00819345		0.787948	-0.070274	0.0179085		0.788106	-0.14271	0.00434993		0.787161	-0.003306	0.00690408
0.788886	-0.191476	0.0382815			0.789208	0.613507	0.00818299		0.78878	-0.070154	0.0179174		0.788938	-0.141928	0.00436177		0.787992	-0.00391	0.0068939
0.789718	-0.193621	0.0381103			0.790041	0.614013	0.00819063		0.789612	-0.070453	0.0178953		0.78977	-0.143417	0.00433923		0.788823	-0.004563	0.00688289
0.79055	-0.193088	0.0381528			0.790873	0.614737	0.00820156		0.790444	-0.070584	0.0178856		0.790602	-0.142882	0.00434733		0.789654	-0.003938	0.00689342
0.791382	-0.194478	0.0380419			0.791706	0.614608	0.00819961		0.791276	-0.070347	0.0179031		0.791435	-0.142212	0.00435747		0.790486	-0.003693	0.00689756
0.792215	-0.194656	0.0380277			0.792538	0.614718	0.00820127		0.792108	-0.071839	0.0177928		0.792267	-0.142231	0.00435719		0.791317	-0.002591	0.00691614
0.793047	-0.195054	0.0379959			0.793371	0.615164	0.008208		0.79294	-0.071889	0.0177891		0.793099	-0.141421	0.00436945		0.792148	-0.002903	0.00691088
0.793879	-0.19596	0.0379236			0.794203	0.615191	0.00820841		0.793772	-0.070953	0.0178583		0.793931	-0.139756	0.00439465		0.792979	-0.000812	0.00694613
0.794711	-0.196906	0.037848			0.795036	0.61481	0.00820266		0.794604	-0.072146	0.0177701		0.794763	-0.139709	0.00439536		0.79381	-0.000375	0.0069535
0.795543	-0.198893	0.0376894			0.795868	0.61534	0.00821066		0.795436	-0.073224	0.0176904		0.795596	-0.13883	0.00440867		0.794642	-0.000842	0.00694563
0.796375	-0.200149	0.0375892			0.796701	0.615065	0.00820651		0.796268	-0.073045	0.0177036		0.796428	-0.138065	0.00442025		0.795473	-0.000904	0.00694458
0.797207	-0.201262	0.0375003			0.797533	0.613762	0.00818684		0.7971	-0.072373	0.0177533		0.79726	-0.137088	0.00443504		0.796304	-0.001614	0.00693261
0.79804	-0.202068	0.037436			0.798366	0.613446	0.00818206		0.797933	-0.072596	0.0177368		0.798092	-0.136058	0.00445064		0.797135	-0.0021	0.00692442
0.798872	-0.200526	0.0375591			0.799198	0.61233	0.00816521		0.798765	-0.072147	0.01777		0.798924	-0.136507	0.00444384		0.797967	-0.002509	0.00691752
0.799704	-0.199561	0.0376361			0.800031	0.611076	0.00814628		0.799597	-0.072541	0.0177409		0.799757	-0.136724	0.00444055		0.798798	-0.002399	0.00691937
0.800536	-0.200594	0.0375536			0.800863	0.611469	0.00815221		0.800429	-0.073696	0.0176555		0.800589	-0.136399	0.00444547		0.799629	-0.001404	0.00693615
0.801368	-0.201783	0.0374587			0.801696	0.611716	0.00815594		0.801261	-0.075752	0.0175035		0.801421	-0.135	0.00446665		0.80046	-0.002654	0.00691507
0.8022	-0.202662	0.0373886			0.802528	0.611778	0.00815688		0.802093	-0.0758	0.0174999		0.802253	-0.134705	0.00447112		0.801291	-0.002133	0.00692386
0.803033	-0.203587	0.0373147			0.803361	0.612879	0.0081735		0.802925	-0.076598	0.0174409		0.803086	-0.13544	0.00445999		0.802123	-0.003125	0.00690713
0.803865	-0.203168	0.0373482			0.804193	0.612772	0.00817189		0.803757	-0.075956	0.0174884		0.803918	-0.135064	0.00446568		0.802954	-0.002336	0.00692044
0.804697	-0.203927	0.0372876			0.805026	0.611229	0.00814859		0.804589	-0.077738	0.0173566		0.80475	-0.13408	0.00448058		0.803785	-0.001938	0.00692715
0.805529	-0.204543	0.0372384			0.805858	0.610008	0.00813015		0.805421	-0.076811	0.0174252		0.805582	-0.13341	0.00449072		0.804616	-0.000997	0.00694301
0.806361	-0.204407	0.0372493			0.806691	0.610025	0.00813041		0.806253	-0.075997	0.0174854		0.806414	-0.13415	0.00447952		0.805448	-0.00164	0.00693217
0.807193	-0.205118	0.0371925			0.807523	0.610882	0.00814335		0.807085	-0.075377	0.0175312		0.807247	-0.133441	0.00449025		0.806279	-0.002433	0.0069188
0.808026	-0.206037	0.0371192			0.808356	0.611483	0.00815243		0.807917	-0.075412	0.0175286		0.808079	-0.132984	0.00449717		0.80711	-0.001022	0.00694259
0.808858	-0.206116	0.0371128			0.809188	0.611787	0.00815702		0.808749	-0.075978	0.0174868		0.808911	-0.132456	0.00450516		0.807941	-0.001837	0.00692885
0.80969	-0.206478	0.0370839			0.810021	0.612129	0.00816218		0.809581	-0.075472	0.0175242		0.809743	-0.132763	0.00450052		0.808772	-0.002184	0.006923
0.810522	-0.207235	0.0370235			0.810853	0.611945	0.0081594		0.810413	-0.075421	0.0175279		0.810575	-0.131243	0.00452353		0.809604	-0.002092	0.00692455
0.811354	-0.208554	0.0369182			0.811686	0.611254	0.00814897		0.811245	-0.075331	0.0175346		0.811408	-0.131404	0.00452109		0.810435	-0.002698	0.00691433
0.812186	-0.208649	0.0369106			0.812518	0.61204	0.00816084		0.812077	-0.074915	0.0175654		0.81224	-0.130743	0.0045311		0.811266	-0.002742	0.00691359
0.813019	-0.209202	0.0368665			0.813351	0.611197	0.00814811		0.812909	-0.07347	0.0176722		0.813072	-0.130545	0.00453409		0.812097	-0.001642	0.00693214
0.813851	-0.210193	0.0367874			0.814183	0.610229	0.00813349		0.813741	-0.075289	0.0175377		0.813904	-0.132427	0.0045056		0.812928	-4.8e-05	0.00695902
0.814683	-0.210319	0.0367773			0.815016	0.609681	0.00812522		0.814573	-0.075705	0.0175069		0.814736	-0.134871	0.00446861		0.81376	-0.00087	0.00694515
0.815515	-0.211345	0.0366954			0.815848	0.610093	0.00813144		0.815405	-0.074851	0.0175701		0.815569	-0.134792	0.0044698		0.814591	-0.001411	0.00693603
0.816347	-0.211243	0.0367036			0.816681	0.610197	0.00813301		0.816238	-0.075535	0.0175195		0.816401	-0.136291	0.00444711		0.815422	0.00021	0.00696337
0.817179	-0.211509	0.0366823			0.817513	0.609321	0.00811978		0.81707	-0.074887	0.0175674		0.817233	-0.137305	0.00443176		0.816253	-0.000646	0.00694893
0.818011	-0.211873	0.0366533			0.818346	0.609717	0.00812576		0.817902	-0.073739	0.0176523		0.818065	-0.137656	0.00442644		0.817084	-0.002135	0.00692383
0.818844	-0.211775	0.0366611			0.819178	0.609387	0.00812078		0.818734	-0.073923	0.0176387		0.818898	-0.137889	0.00442292		0.817916	-0.001976	0.00692651
0.819676	-0.214822	0.0364179			0.820011	0.609359	0.00812035		0.819566	-0.075077	0.0175534		0.81973	-0.136955	0.00443706		0.818747	-0.00185	0.00692863
0.820508	-0.217198	0.0362282			0.820843	0.610214	0.00813326		0.820398	-0.076396	0.0174559		0.820562	-0.136807	0.0044393		0.819578	-0.002082	0.00692472
0.82134	-0.216517	0.0362826			0.821676	0.609513	0.00812268		0.82123	-0.075503	0.0175219		0.821394	-0.13715	0.0044341		0.820409	-0.002268	0.00692158
0.822172	-0.216144	0.0363123			0.822508	0.608164	0.00810231		0.822062	-0.074606	0.0175882		0.822226	-0.138619	0.00441187		0.821241	-0.002571	0.00691647
0.823004	-0.216683	0.0362693			0.823341	0.607449	0.00809152		0.822894	-0.07479	0.0175746		0.823059	-0.139639	0.00439642		0.822072	-0.003392	0.00690263
0.823837	-0.217229	0.0362257			0.824173	0.605828	0.00806704		0.823726	-0.075615	0.0175136		0.823891	-0.139306	0.00440147		0.822903	-0.003194	0.00690597
0.824669	-0.217609	0.0361954			0.825006	0.604798	0.00805149		0.824558	-0.075789	0.0175007		0.824723	-0.141081	0.00437459		0.823734	-0.004492	0.00688408
0.825501	-0.217722	0.0361864			0.825838	0.605485	0.00806186		0.82539	-0.075042	0.017556		0.825555	-0.142325	0.00435576		0.824565	-0.004184	0.00688928
0.826333	-0.217435	0.0362093			0.826671	0.605798	0.00806659		0.826222	-0.076029	0.017483		0.826387	-0.14277	0.00434903		0.825397	-0.003958	0.00689309
0.827165	-0.218126	0.0361541			0.827503	0.605338	0.00805964		0.827054	-0.078487	0.0173012		0.82722	-0.143005	0.00434547		0.826228	-0.003128	0.00690708
0.827997	-0.217727	0.036186			0.828336	0.604203	0.0080425		0.827886	-0.080336	0.0171645		0.828052	-0.143647	0.00433575		0.827059	-0.002922	0.00691056
0.82883	-0.218591	0.036117			0.829168	0.602835	0.00802185		0.828718	-0.08021	0.0171738		0.828884	-0.144147	0.00432818		0.82789	-0.004743	0.00687985
0.829662	-0.21914	0.0360732			0.830001	0.601446	0.00800088		0.82955	-0.080383	0.0171611		0.829716	-0.144587	0.00432152		0.828722	-0.006167	0.00685584
0.830494	-0.218584	0.0361176			0.830833	0.60095	0.00799339		0.830382	-0.080837	0.0171275		0.830549	-0.143271	0.00434144		0.829553	-0.006648	0.00684773
0.831326	-0.218904	0.036092			0.831666	0.600419	0.00798537		0.831214	-0.08228	0.0170208		0.831381	-0.142851	0.0043478		0.830384	-0.007554	0.00683245
0.832158	-0.220552	0.0359605			0.832498	0.600589	0.00798794		0.832046	-0.083375	0.0169398		0.832213	-0.14278	0.00434887		0.831215	-0.006941	0.00684279
0.83299	-0.222242	0.0358256			0.833331	0.600002	0.00797907		0.832878	-0.084215	0.0168777		0.833045	-0.142739	0.0043495		0.832046	-0.007058	0.00684082
0.833822	-0.222999	0.0357651			0.834163	0.599669	0.00797404		0.83371	-0.085019	0.0168183		0.833877	-0.14197	0.00436114		0.832878	-0.008802	0.00681141
0.834655	-0.222866	0.0357757			0.834996	0.598856	0.00796177		0.834543	-0.085205	0.0168045		0.83471	-0.141572	0.00436716		0.833709	-0.009399	0.00680134
0.835487	-0.223412	0.0357322			0.835828	0.598856	0.00796177		0.835375	-0.085686	0.016769		0.835542	-0.139518	0.00439826		0.83454	-0.008744	0.00681239
0.836319	-0.223101	0.035757			0.836661	0.598735	0.00795994		0.836207	-0.086151	0.0167346		0.836374	-0.140025	0.00439058		0.835371	-0.008873	0.00681021
0.837151	-0.224071	0.0356796			0.837493	0.598177	0.00795152		0.837039	-0.084955	0.016823		0.837206	-0.13731	0.00443168		0.836202	-0.009424	0.00680092
0.837983	-0.225362	0.0355765			0.838326	0.59839	0.00795473		0.837871	-0.084867	0.0168295		0.838038	-0.136065	0.00445053		0.837034	-0.009498	0.00679967
0.838815	-0.225295	0.0355819			0.839158	0.598405	0.00795496		0.838703	-0.084934	0.0168246		0.838871	-0.135616	0.00445733		0.837865	-0.008776	0.00681185
0.839648	-0.225999	0.0355257			0.839991	0.597994	0.00794875		0.839535	-0.08508	0.0168138		0.839703	-0.134347	0.00447654		0.838696	-0.009255	0.00680377
0.84048	-0.223962	0.0356883			0.840823	0.597948	0.00794806		0.840367	-0.084394	0.0168645		0.840535	-0.133068	0.0044959		0.839527	-0.009834	0.00679401
0.841312	-0.223376	0.035735			0.841656	0.597334	0.00793879		0.841199	-0.083768	0.0169108		0.841367	-0.131827	0.00451469		0.840359	-0.009804	0.00679451
0.842144	-0.224478	0.0356471			0.842488	0.597892	0.00794721		0.842031	-0.084702	0.0168417		0.8422	-0.130436	0.00453574		0.84119	-0.010451	0.00678361
0.842976	-0.225259	0.0355847			0.843321	0.599437	0.00797054		0.842863	-0.085158	0.016808		0.843032	-0.129824	0.00454501		0.842021	-0.010652	0.00678022
0.843808	-0.225673	0.0355517			0.844153	0.600117	0.00798081		0.843695	-0.085075	0.0168141		0.843864	-0.127954	0.00457332		0.842852	-0.011089	0.00677285
0.84464	-0.225804	0.0355412			0.844986	0.59989	0.00797738		0.844527	-0.083708	0.0169152		0.844696	-0.127936	0.00457359		0.843683	-0.01033	0.00678565
0.845473	-0.227127	0.0354356			0.845818	0.599244	0.00796763		0.845359	-0.082905	0.0169746		0.845528	-0.12604	0.00460229		0.844515	-0.009816	0.00679431
0.846305	-0.228259	0.0353452			0.846651	0.599143	0.0079661		0.846191	-0.082513	0.0170036		0.846361	-0.123795	0.00463628		0.845346	-0.011264	0.0067699
0.847137	-0.228982	0.0352875			0.847483	0.599152	0.00796624		0.847023	-0.082168	0.0170291		0.847193	-0.121891	0.0046651		0.846177	-0.010594	0.00678119
0.847969	-0.228691	0.0353108			0.848316	0.598592	0.00795778		0.847855	-0.08157	0.0170733		0.848025	-0.120524	0.0046858		0.847008	-0.011376	0.00676801
0.848801	-0.228152	0.0353538			0.849148	0.597512	0.00794148		0.848687	-0.081344	0.01709		0.848857	-0.118015	0.00472378		0.847839	-0.011957	0.00675821
0.849633	-0.227933	0.0353713			0.849981	0.596505	0.00792627		0.849519	-0.081988	0.0170424		0.849689	-0.116631	0.00474473		0.848671	-0.011466	0.00676649
0.850466	-0.228483	0.0353274			0.850813	0.595802	0.00791566		0.850351	-0.081515	0.0170774		0.850522	-0.116449	0.00474749		0.849502	-0.010612	0.00678089
0.851298	-0.229449	0.0352503			0.851646	0.595491	0.00791096		0.851183	-0.08249	0.0170053		0.851354	-0.116951	0.00473989		0.850333	-0.010555	0.00678185
0.85213	-0.228702	0.0353099			0.852478	0.595103	0.0079051		0.852015	-0.08242	0.0170104		0.852186	-0.115535	0.00476132		0.851164	-0.0095	0.00679964
0.852962	-0.228491	0.0353267			0.853311	0.594619	0.00789779		0.852848	-0.081002	0.0171153		0.853018	-0.114477	0.00477734		0.851996	-0.009986	0.00679145
0.853794	-0.227807	0.0353813			0.854143	0.595332	0.00790856		0.85368	-0.081032	0.0171131		0.85385	-0.112764	0.00480327		0.852827	-0.010342	0.00678544
0.854626	-0.228845	0.0352985			0.854976	0.596569	0.00792724		0.854512	-0.081222	0.017099		0.854683	-0.113039	0.00479911		0.853658	-0.01003	0.0067907
0.855459	-0.230483	0.0351677			0.855808	0.596917	0.00793249		0.855344	-0.08087	0.017125		0.855515	-0.111529	0.00482197		0.854489	-0.01068	0.00677974
0.856291	-0.230739	0.0351473			0.856641	0.596386	0.00792447		0.856176	-0.080412	0.0171589		0.856347	-0.109373	0.00485461		0.85532	-0.012148	0.00675499
0.857123	-0.23222	0.0350291			0.857473	0.596456	0.00792553		0.857008	-0.080028	0.0171873		0.857179	-0.107183	0.00488776		0.856152	-0.01232	0.00675209
0.857955	-0.231001	0.0351264			0.858306	0.596194	0.00792158		0.85784	-0.080057	0.0171852		0.858012	-0.106424	0.00489925		0.856983	-0.012132	0.00675526
0.858787	-0.230578	0.0351601			0.859138	0.594662	0.00789844		0.858672	-0.081699	0.0170637		0.858844	-0.106208	0.00490252		0.857814	-0.012993	0.00674074
0.859619	-0.231133	0.0351158			0.859971	0.59323	0.00787682		0.859504	-0.082538	0.0170017		0.859676	-0.104643	0.00492621		0.858645	-0.012678	0.00674605
0.860452	-0.232028	0.0350444			0.860803	0.592159	0.00786065		0.860336	-0.082585	0.0169982		0.860508	-0.104218	0.00493265		0.859477	-0.012141	0.00675511
0.861284	-0.234198	0.0348712			0.861636	0.591872	0.00785632		0.861168	-0.082522	0.0170029		0.86134	-0.10426	0.00493201		0.860308	-0.011386	0.00676784
0.862116	-0.234207	0.0348704			0.862468	0.592772	0.00786991		0.862	-0.083035	0.016965		0.862173	-0.103052	0.0049503		0.861139	-0.010998	0.00677438
0.862948	-0.233447	0.0349311			0.863301	0.593218	0.00787664		0.862832	-0.082453	0.017008		0.863005	-0.102369	0.00496064		0.86197	-0.01069	0.00677958
0.86378	-0.234247	0.0348672			0.864133	0.592819	0.00787062		0.863664	-0.081001	0.0171154		0.863837	-0.100456	0.0049896		0.862801	-0.010807	0.0067776
0.864612	-0.233972	0.0348892			0.864966	0.592245	0.00786195		0.864496	-0.081835	0.0170537		0.864669	-0.101092	0.00497997		0.863633	-0.010828	0.00677725
0.865444	-0.234086	0.0348801			0.865798	0.59192	0.00785704		0.865328	-0.083627	0.0169212		0.865501	-0.099575	0.00500293		0.864464	-0.012579	0.00674772
0.866277	-0.232709	0.03499			0.866631	0.592012	0.00785843		0.86616	-0.084213	0.0168779		0.866334	-0.098703	0.00501614		0.865295	-0.013261	0.00673622
0.867109	-0.231616	0.0350773			0.867463	0.591041	0.00784377		0.866992	-0.084021	0.0168921		0.867166	-0.098719	0.00501589		0.866126	-0.012761	0.00674466
0.867941	-0.231836	0.0350597			0.868296	0.589915	0.00782677		0.867824	-0.083881	0.0169024		0.867998	-0.098936	0.00501261		0.866957	-0.014032	0.00672322
0.868773	-0.231942	0.0350512			0.869128	0.589723	0.00782387		0.868656	-0.083324	0.0169436		0.86883	-0.097864	0.00502884		0.867789	-0.013691	0.00672897
0.869605	-0.233208	0.0349502			0.869961	0.590326	0.00783297		0.869488	-0.083126	0.0169582		0.869663	-0.096636	0.00504743		0.86862	-0.013767	0.00672769
0.870437	-0.234852	0.0348189			0.870793	0.592076	0.0078594		0.87032	-0.083453	0.0169341		0.870495	-0.095677	0.00506194		0.869451	-0.014175	0.00672081
0.87127	-0.235016	0.0348059			0.871626	0.593286	0.00787767		0.871153	-0.084369	0.0168663		0.871327	-0.094712	0.00507655		0.870282	-0.013706	0.00672872
0.872102	-0.235113	0.0347981			0.872458	0.593226	0.00787676		0.871985	-0.082286	0.0170203		0.872159	-0.093176	0.00509981		0.871113	-0.013126	0.0067385
0.872934	-0.236531	0.0346849			0.873291	0.592056	0.00785909		0.872817	-0.081457	0.0170816		0.872991	-0.093348	0.0050972		0.871945	-0.013458	0.0067329
0.873766	-0.236659	0.0346747			0.874123	0.591328	0.0078481		0.873649	-0.084008	0.016893		0.873824	-0.092279	0.00511339		0.872776	-0.013478	0.00673257
0.874598	-0.236453	0.0346911			0.874956	0.590684	0.00783838		0.874481	-0.084311	0.0168706		0.874656	-0.091969	0.00511808		0.873607	-0.013681	0.00672914
0.87543	-0.234771	0.0348254			0.875788	0.59052	0.0078359		0.875313	-0.083041	0.0169645		0.875488	-0.091716	0.00512191		0.874438	-0.014106	0.00672198
0.876263	-0.234759	0.0348264			0.876621	0.590716	0.00783886		0.876145	-0.082568	0.0169995		0.87632	-0.090729	0.00513685		0.87527	-0.014542	0.00671462
0.877095	-0.234666	0.0348338			0.877453	0.590593	0.00783701		0.876977	-0.083344	0.0169421		0.877153	-0.091055	0.00513191		0.876101	-0.014919	0.00670827
0.877927	-0.234517	0.0348457			0.878286	0.590084	0.00782932		0.877809	-0.084626	0.0168473		0.877985	-0.089976	0.00514825		0.876932	-0.014845	0.00670952
0.878759	-0.235514	0.0347661			0.879118	0.589353	0.00781828		0.878641	-0.084611	0.0168484		0.878817	-0.090405	0.00514175		0.877763	-0.014839	0.00670962
0.879591	-0.234149	0.0348751			0.879951	0.589355	0.00781831		0.879473	-0.083097	0.0169604		0.879649	-0.089258	0.00515912		0.878594	-0.014817	0.00670999
0.880423	-0.234249	0.0348671			0.880783	0.590634	0.00783762		0.880305	-0.083772	0.0169105		0.880481	-0.087797	0.00518124		0.879426	-0.015172	0.006704
0.881255	-0.234008	0.0348863			0.881616	0.591607	0.00785232		0.881137	-0.083541	0.0169276		0.881314	-0.08619	0.00520556		0.880257	-0.015775	0.00669383
0.882088	-0.234518	0.0348456			0.882448	0.591539	0.00785129		0.881969	-0.084936	0.0168244		0.882146	-0.08561	0.00521434		0.881088	-0.015383	0.00670044
0.88292	-0.234901	0.034815			0.883281	0.590441	0.00783471		0.882801	-0.083215	0.0169517		0.882978	-0.086143	0.00520628		0.881919	-0.014989	0.00670709
0.883752	-0.235589	0.0347601			0.884113	0.588751	0.00780919		0.883633	-0.083351	0.0169416		0.88381	-0.086604	0.0051993		0.882751	-0.015396	0.00670023
0.884584	-0.235351	0.0347791			0.884946	0.588447	0.0078046		0.884465	-0.084603	0.016849		0.884642	-0.085836	0.00521092		0.883582	-0.014972	0.00670737
0.885416	-0.234653	0.0348348			0.885778	0.588512	0.00780558		0.885297	-0.083645	0.0169199		0.885475	-0.082418	0.00526267		0.884413	-0.014068	0.00672262
0.886248	-0.234977	0.034809			0.886611	0.589444	0.00781966		0.886129	-0.083329	0.0169432		0.886307	-0.082275	0.00526483		0.885244	-0.013283	0.00673585
0.887081	-0.235383	0.0347766			0.887443	0.591531	0.00785117		0.886961	-0.084371	0.0168662		0.887139	-0.082142	0.00526684		0.886075	-0.013712	0.00672862
0.887913	-0.235218	0.0347897			0.888276	0.591853	0.00785603		0.887793	-0.084067	0.0168887		0.887971	-0.08258	0.00526021		0.886907	-0.014545	0.00671457
0.888745	-0.236377	0.0346972			0.889108	0.591527	0.00785111		0.888626	-0.084647	0.0168458		0.888803	-0.081418	0.0052778		0.887738	-0.01497	0.00670741
0.889577	-0.23739	0.0346163			0.889941	0.591531	0.00785117		0.889458	-0.085074	0.0168142		0.889636	-0.080659	0.00528929		0.888569	-0.015751	0.00669424
0.890409	-0.237645	0.034596			0.890773	0.591515	0.00785093		0.89029	-0.084619	0.0168478		0.890468	-0.081325	0.00527921		0.8894	-0.016436	0.00668269
0.891241	-0.237906	0.0345752			0.891606	0.591783	0.00785497		0.891122	-0.084913	0.0168261		0.8913	-0.081957	0.00526965		0.890231	-0.016046	0.00668927
0.892074	-0.238191	0.0345524			0.892438	0.592274	0.00786239		0.891954	-0.084886	0.0168281		0.892132	-0.08027	0.00529518		0.891063	-0.015674	0.00669554
0.892906	-0.238042	0.0345643			0.893271	0.592616	0.00786755		0.892786	-0.086363	0.0167189		0.892965	-0.080664	0.00528922		0.891894	-0.016499	0.00668163
0.893738	-0.236913	0.0346544			0.894103	0.591852	0.00785601		0.893618	-0.086801	0.0166865		0.893797	-0.079351	0.0053091		0.892725	-0.01695	0.00667402
0.89457	-0.237013	0.0346464			0.894936	0.590899	0.00784163		0.89445	-0.085404	0.0167898		0.894629	-0.07946	0.00530745		0.893556	-0.017043	0.00667245
0.895402	-0.238287	0.0345447			0.895768	0.591722	0.00785405		0.895282	-0.08451	0.0168559		0.895461	-0.079946	0.00530009		0.894388	-0.016931	0.00667434
0.896234	-0.239959	0.0344113			0.896601	0.592068	0.00785928		0.896114	-0.08556	0.0167783		0.896293	-0.078606	0.00532037		0.895219	-0.016944	0.00667412
0.897066	-0.240717	0.0343508			0.897433	0.591563	0.00785165		0.896946	-0.085127	0.0168103		0.897126	-0.077816	0.00533233		0.89605	-0.016825	0.00667613
0.897899	-0.242634	0.0341977			0.898266	0.591655	0.00785304		0.897778	-0.085304	0.0167972		0.897958	-0.077564	0.00533615		0.896881	-0.015384	0.00670043
0.898731	-0.241722	0.0342705			0.899098	0.590727	0.00783903		0.89861	-0.084456	0.0168599		0.89879	-0.077773	0.00533298		0.897712	-0.014928	0.00670812
0.899563	-0.241781	0.0342658			0.899931	0.5912	0.00784617		0.899442	-0.0846	0.0168493		0.899622	-0.076868	0.00534669		0.898544	-0.015639	0.00669613
0.900395	-0.242424	0.0342145			0.900763	0.592121	0.00786008		0.900274	-0.08545	0.0167864		0.900454	-0.076031	0.00535936		0.899375	-0.014685	0.00671221
0.901227	-0.242411	0.0342155			0.901596	0.591663	0.00785316		0.901106	-0.084925	0.0168252		0.901287	-0.076729	0.00534879		0.900206	-0.013975	0.00672419
0.902059	-0.243078	0.0341623			0.902428	0.591312	0.00784786		0.901938	-0.083521	0.016929		0.902119	-0.076726	0.00534883		0.901037	-0.014068	0.00672262
0.902892	-0.242437	0.0342135			0.903261	0.59129	0.00784753		0.90277	-0.082615	0.016996		0.902951	-0.076538	0.00535168		0.901868	-0.014129	0.00672159
0.903724	-0.241752	0.0342681			0.904093	0.591875	0.00785636		0.903602	-0.083568	0.0169256		0.903783	-0.076203	0.00535675		0.9027	-0.014574	0.00671409
0.904556	-0.241831	0.0342618			0.904926	0.592554	0.00786661		0.904434	-0.084129	0.0168841		0.904616	-0.07592	0.00536104		0.903531	-0.01423	0.00671989
0.905388	-0.242313	0.0342234			0.905758	0.591374	0.0078488		0.905266	-0.084399	0.0168641		0.905448	-0.076492	0.00535238		0.904362	-0.01467	0.00671247
0.90622	-0.244596	0.0340411			0.906591	0.591239	0.00784676		0.906098	-0.083897	0.0169012		0.90628	-0.078452	0.00532271		0.905193	-0.015823	0.00669303
0.907052	-0.245459	0.0339722			0.907423	0.590123	0.00782991		0.906931	-0.08298	0.016969		0.907112	-0.078103	0.00532799		0.906025	-0.015983	0.00669033
0.907885	-0.245847	0.0339413			0.908256	0.588219	0.00780116		0.907763	-0.082335	0.0170167		0.907944	-0.07586	0.00536194		0.906856	-0.014714	0.00671172
0.908717	-0.246308	0.0339045			0.909088	0.58906	0.00781386		0.908595	-0.083059	0.0169632		0.908777	-0.07418	0.00538738		0.907687	-0.01354	0.00673152
0.909549	-0.246364	0.0339			0.909921	0.590018	0.00782832		0.909427	-0.083252	0.0169489		0.909609	-0.074698	0.00537954		0.908518	-0.013516	0.00673192
0.910381	-0.247055	0.0338448			0.910753	0.590061	0.00782897		0.910259	-0.082704	0.0169894		0.910441	-0.074428	0.00538362		0.909349	-0.013141	0.00673825
0.911213	-0.246794	0.0338657			0.911586	0.589591	0.00782188		0.911091	-0.082912	0.0169741		0.911273	-0.074007	0.00539		0.910181	-0.012792	0.00674413
0.912045	-0.246682	0.0338746			0.912418	0.589271	0.00781704		0.911923	-0.083064	0.0169628		0.912105	-0.07324	0.00540161		0.911012	-0.012618	0.00674707
0.912878	-0.247566	0.033804			0.913251	0.588446	0.00780459		0.912755	-0.08333	0.0169432		0.912938	-0.071388	0.00542964		0.911843	-0.012907	0.00674219
0.91371	-0.249102	0.0336814			0.914083	0.587841	0.00779545		0.913587	-0.082436	0.0170093		0.91377	-0.06977	0.00545414		0.912674	-0.013052	0.00673975
0.914542	-0.250508	0.0335692			0.914916	0.588722	0.00780875		0.914419	-0.082247	0.0170232		0.914602	-0.069552	0.00545744		0.913505	-0.012967	0.00674118
0.915374	-0.25072	0.0335523			0.915748	0.589726	0.00782391		0.915251	-0.083483	0.0169318		0.915434	-0.069492	0.00545835		0.914337	-0.012786	0.00674423
0.916206	-0.24997	0.0336121			0.916581	0.589729	0.00782396		0.916083	-0.084471	0.0168588		0.916267	-0.068887	0.00546751		0.915168	-0.013066	0.00673951
0.917038	-0.250866	0.0335406			0.917413	0.588662	0.00780785		0.916915	-0.084315	0.0168703		0.917099	-0.069862	0.00545275		0.915999	-0.012643	0.00674664
0.91787	-0.251225	0.0335119			0.918246	0.588116	0.0077996		0.917747	-0.085444	0.0167868		0.917931	-0.070604	0.00544151		0.91683	-0.012948	0.0067415
0.918703	-0.250433	0.0335752			0.919078	0.588036	0.0077984		0.918579	-0.085499	0.0167828		0.918763	-0.068993	0.0054659		0.917662	-0.013966	0.00672434
0.919535	-0.251442	0.0334946			0.919911	0.588486	0.00780519		0.919411	-0.085989	0.0167465		0.919595	-0.069674	0.00545559		0.918493	-0.014603	0.0067136
0.920367	-0.252081	0.0334436			0.920743	0.590406	0.00783418		0.920243	-0.085023	0.016818		0.920428	-0.070736	0.00543951		0.919324	-0.014408	0.00671688
0.921199	-0.252783	0.0333876			0.921576	0.590752	0.00783941		0.921075	-0.084312	0.0168705		0.92126	-0.070217	0.00544737		0.920155	-0.015359	0.00670085
0.922031	-0.253794	0.0333069			0.922408	0.590412	0.00783427		0.921907	-0.083995	0.016894		0.922092	-0.070724	0.0054397		0.920986	-0.016195	0.00668675
0.922863	-0.254652	0.0332384			0.923241	0.589757	0.00782438		0.922739	-0.085382	0.0167914		0.922924	-0.070777	0.00543889		0.921818	-0.01675	0.00667739
0.923696	-0.253808	0.0333058			0.924073	0.588834	0.00781045		0.923571	-0.086093	0.0167389		0.923756	-0.069416	0.0054595		0.922649	-0.017245	0.00666905
0.924528	-0.254948	0.0332148			0.924906	0.588414	0.0078041		0.924404	-0.086167	0.0167334		0.924589	-0.068153	0.00547862		0.92348	-0.017882	0.00665831
0.92536	-0.255429	0.0331764			0.925738	0.587522	0.00779064		0.925236	-0.085308	0.0167969		0.925421	-0.066331	0.0055062		0.924311	-0.018407	0.00664946
0.926192	-0.255077	0.0332045			0.926571	0.588396	0.00780383		0.926068	-0.084174	0.0168807		0.926253	-0.064837	0.00552882		0.925142	-0.018496	0.00664795
0.927024	-0.255265	0.0331894			0.927403	0.586786	0.00777952		0.9269	-0.084809	0.0168338		0.927085	-0.064511	0.00553375		0.925974	-0.018712	0.00664431
0.927856	-0.256421	0.0330972			0.928236	0.586257	0.00777154		0.927732	-0.085402	0.01679		0.927917	-0.063142	0.00555448		0.926805	-0.019669	0.00662818
0.928688	-0.257688	0.032996			0.929068	0.586793	0.00777963		0.928564	-0.085419	0.0167887		0.92875	-0.063902	0.00554297		0.927636	-0.021036	0.00660513
0.929521	-0.259736	0.0328325			0.929901	0.585321	0.0077574		0.929396	-0.085256	0.0168007		0.929582	-0.063692	0.00554615		0.928467	-0.022271	0.0065843
0.930353	-0.260195	0.0327959			0.930733	0.584247	0.00774119		0.930228	-0.085658	0.016771		0.930414	-0.062327	0.00556681		0.929299	-0.022631	0.00657823
0.931185	-0.260577	0.0327654			0.931566	0.583456	0.00772924		0.93106	-0.085894	0.0167536		0.931246	-0.062577	0.00556303		0.93013	-0.022571	0.00657924
0.932017	-0.262051	0.0326477			0.932398	0.584021	0.00773777		0.931892	-0.086592	0.016702		0.932079	-0.062067	0.00557075		0.930961	-0.023316	0.00656668
0.932849	-0.262614	0.0326028			0.933231	0.583832	0.00773492		0.932724	-0.085926	0.0167512		0.932911	-0.060196	0.00559907		0.931792	-0.023816	0.00655825
0.933681	-0.26335	0.032544			0.934063	0.582812	0.00771952		0.933556	-0.08435	0.0168677		0.933743	-0.06076	0.00559054		0.932623	-0.02422	0.00655144
0.934514	-0.262921	0.0325783			0.934896	0.582224	0.00771064		0.934388	-0.084471	0.0168588		0.934575	-0.060315	0.00559727		0.933455	-0.02365	0.00656105
0.935346	-0.262808	0.0325873			0.935728	0.580764	0.0076886		0.93522	-0.084311	0.0168706		0.935407	-0.059708	0.00560646		0.934286	-0.022769	0.00657591
0.936178	-0.264319	0.0324667			0.936561	0.579885	0.00767532		0.936052	-0.083919	0.0168996		0.93624	-0.059521	0.00560929		0.935117	-0.023094	0.00657043
0.93701	-0.263335	0.0325452			0.937393	0.578447	0.00765361		0.936884	-0.083914	0.0169		0.937072	-0.058378	0.0056266		0.935948	-0.023302	0.00656692
0.937842	-0.262245	0.0326323			0.938226	0.578267	0.00765089		0.937716	-0.083799	0.0169085		0.937904	-0.056542	0.00565439		0.936779	-0.022917	0.00657341
0.938674	-0.262069	0.0326463			0.939058	0.578495	0.00765434		0.938548	-0.084641	0.0168462		0.938736	-0.05627	0.00565851		0.937611	-0.022777	0.00657577
0.939507	-0.262276	0.0326298			0.939891	0.577679	0.00764202		0.93938	-0.084226	0.0168769		0.939568	-0.056313	0.00565786		0.938442	-0.023554	0.00656267
0.940339	-0.262994	0.0325725			0.940723	0.57718	0.00763448		0.940212	-0.084901	0.016827		0.940401	-0.054794	0.00568085		0.939273	-0.023738	0.00655957
0.941171	-0.261553	0.0326875			0.941556	0.575069	0.00760261		0.941044	-0.085953	0.0167492		0.941233	-0.053909	0.00569425		0.940104	-0.022933	0.00657314
0.942003	-0.260975	0.0327336			0.942388	0.573705	0.00758201		0.941877	-0.086932	0.0166768		0.942065	-0.053845	0.00569522		0.940936	-0.023784	0.00655879
0.942835	-0.260432	0.032777			0.943221	0.574092	0.00758785		0.942709	-0.087601	0.0166274		0.942897	-0.053444	0.00570129		0.941767	-0.02433	0.00654958
0.943667	-0.260368	0.0327821			0.944053	0.575222	0.00760492		0.943541	-0.087422	0.0166406		0.94373	-0.0528	0.00571104		0.942598	-0.024333	0.00654953
0.944499	-0.26155	0.0326877			0.944886	0.576184	0.00761944		0.944373	-0.086322	0.0167219		0.944562	-0.051744	0.00572703		0.943429	-0.024519	0.0065464
0.945332	-0.261979	0.0326535			0.945718	0.575077	0.00760273		0.945205	-0.086086	0.0167394		0.945394	-0.051528	0.0057303		0.94426	-0.025014	0.00653805
0.946164	-0.263228	0.0325538			0.946551	0.574968	0.00760108		0.946037	-0.086305	0.0167232		0.946226	-0.051284	0.00573399		0.945092	-0.025585	0.00652842
0.946996	-0.264262	0.0324712			0.947383	0.576224	0.00762005		0.946869	-0.087741	0.016617		0.947058	-0.049889	0.00575511		0.945923	-0.025911	0.00652293
0.947828	-0.264461	0.0324554			0.948216	0.577526	0.00763971		0.947701	-0.088859	0.0165343		0.947891	-0.04799	0.00578386		0.946754	-0.024906	0.00653987
0.94866	-0.264214	0.0324751			0.949048	0.577958	0.00764623		0.948533	-0.089002	0.0165238		0.948723	-0.048688	0.00577329		0.947585	-0.023065	0.00657091
0.949492	-0.26399	0.032493			0.949881	0.577721	0.00764265		0.949365	-0.088226	0.0165811		0.949555	-0.048034	0.00578319		0.948417	-0.021561	0.00659627
0.950325	-0.263452	0.0325359			0.950713	0.57873	0.00765788		0.950197	-0.088126	0.0165885		0.950387	-0.047153	0.00579653		0.949248	-0.02089	0.00660759
0.951157	-0.262653	0.0325997			0.951546	0.578964	0.00766142		0.951029	-0.088674	0.016548		0.951219	-0.047119	0.00579704		0.950079	-0.020978	0.0066061
0.951989	-0.263457	0.0325355			0.952378	0.578848	0.00765967		0.951861	-0.089294	0.0165022		0.952052	-0.045481	0.00582184		0.95091	-0.021036	0.00660513
0.952821	-0.263306	0.0325476			0.953211	0.578023	0.00764721		0.952693	-0.088631	0.0165512		0.952884	-0.044849	0.00583141		0.951741	-0.020433	0.00661529
0.953653	-0.263221	0.0325543			0.954043	0.577516	0.00763955		0.953525	-0.088991	0.0165246		0.953716	-0.046135	0.00581194		0.952573	-0.019479	0.00663138
0.954485	-0.262613	0.0326029			0.954876	0.577739	0.00764292		0.954357	-0.090037	0.0164472		0.954548	-0.045277	0.00582493		0.953404	-0.018903	0.00664109
0.955318	-0.262942	0.0325766			0.955708	0.578493	0.00765431		0.955189	-0.090777	0.0163925		0.95538	-0.044569	0.00583564		0.954235	-0.019279	0.00663475
0.95615	-0.264093	0.0324847			0.956541	0.579358	0.00766737		0.956021	-0.091286	0.0163549		0.956213	-0.04331	0.0058547		0.955066	-0.019016	0.00663919
0.956982	-0.263672	0.0325183			0.957373	0.579306	0.00766658		0.956853	-0.09102	0.0163746		0.957045	-0.041249	0.0058859		0.955897	-0.017954	0.00665709
0.957814	-0.263787	0.0325092			0.958206	0.578182	0.00764961		0.957685	-0.090932	0.0163811		0.957877	-0.039687	0.00590955		0.956729	-0.017912	0.0066578
0.958646	-0.265757	0.0323519			0.959038	0.577752	0.00764312		0.958517	-0.090524	0.0164112		0.958709	-0.040119	0.00590301		0.95756	-0.018595	0.00664629
0.959478	-0.266333	0.0323059			0.959871	0.576777	0.0076284		0.959349	-0.089121	0.016515		0.959542	-0.039033	0.00591945		0.958391	-0.019354	0.00663349
0.960311	-0.266105	0.0323241			0.960703	0.576432	0.00762319		0.960182	-0.08888	0.0165328		0.960374	-0.038251	0.00593129		0.959222	-0.019064	0.00663838
0.961143	-0.266219	0.032315			0.961536	0.576556	0.00762506		0.961014	-0.088516	0.0165597		0.961206	-0.038727	0.00592408		0.960054	-0.018544	0.00664715
0.961975	-0.268635	0.0321222			0.962368	0.577397	0.00763776		0.961846	-0.087666	0.0166226		0.962038	-0.037271	0.00594613		0.960885	-0.018215	0.00665269
0.962807	-0.270507	0.0319727			0.963201	0.577831	0.00764431		0.962678	-0.086285	0.0167247		0.96287	-0.036271	0.00596126		0.961716	-0.016921	0.00667451
0.963639	-0.27087	0.0319438			0.964033	0.577901	0.00764537		0.96351	-0.086051	0.016742		0.963703	-0.034606	0.00598647		0.962547	-0.016357	0.00668402
0.964471	-0.271348	0.0319056			0.964866	0.577526	0.00763971		0.964342	-0.086341	0.0167205		0.964535	-0.033736	0.00599964		0.963378	-0.017006	0.00667308
0.965303	-0.271745	0.0318739			0.965698	0.577537	0.00763987		0.965174	-0.087268	0.016652		0.965367	-0.033636	0.00600115		0.96421	-0.017803	0.00665964
0.966136	-0.271913	0.0318605			0.966531	0.578149	0.00764911		0.966006	-0.087331	0.0166473		0.966199	-0.031957	0.00602657		0.965041	-0.017206	0.00666971
0.966968	-0.271371	0.0319038			0.967363	0.577579	0.00764051		0.966838	-0.087865	0.0166078		0.967031	-0.030853	0.00604328		0.965872	-0.015802	0.00669338
0.9678	-0.270793	0.0319499			0.968196	0.576689	0.00762707		0.96767	-0.087386	0.0166433		0.967864	-0.031868	0.00602792		0.966703	-0.015539	0.00669781
0.968632	-0.269846	0.0320255			0.969028	0.576863	0.00762969		0.968502	-0.086732	0.0166916		0.968696	-0.032604	0.00601678		0.967534	-0.016434	0.00668272
0.969464	-0.269113	0.032084			0.969861	0.576479	0.0076239		0.969334	-0.087435	0.0166396		0.969528	-0.031271	0.00603696		0.968366	-0.01656	0.0066806
0.970296	-0.268755	0.0321126			0.970693	0.576062	0.0076176		0.970166	-0.088606	0.0165531		0.97036	-0.030007	0.00605609		0.969197	-0.016154	0.00668744
0.971129	-0.268863	0.032104			0.971526	0.575579	0.00761031		0.970998	-0.089508	0.0164864		0.971193	-0.029632	0.00606177		0.970028	-0.016176	0.00668707
0.971961	-0.270285	0.0319904			0.972358	0.574467	0.00759352		0.97183	-0.088918	0.01653		0.972025	-0.029457	0.00606442		0.970859	-0.015667	0.00669566
0.972793	-0.268693	0.0321175			0.973191	0.575206	0.00760468		0.972662	-0.088837	0.016536		0.972857	-0.028531	0.00607844		0.971691	-0.014928	0.00670812
0.973625	-0.268657	0.0321204			0.974023	0.5747	0.00759704		0.973494	-0.089824	0.016463		0.973689	-0.027778	0.00608984		0.972522	-0.015508	0.00669834
0.974457	-0.268667	0.0321196			0.974856	0.573837	0.007584		0.974326	-0.090087	0.0164435		0.974521	-0.02574	0.00612069		0.973353	-0.016531	0.00668109
0.975289	-0.269537	0.0320502			0.975688	0.572956	0.0075707		0.975158	-0.090079	0.0164441		0.975354	-0.025439	0.00612524		0.974184	-0.017187	0.00667003
0.976121	-0.270517	0.0319719			0.976521	0.57074	0.00753724		0.97599	-0.091269	0.0163561		0.976186	-0.024573	0.00613835		0.975015	-0.017761	0.00666035
0.976954	-0.270406	0.0319808			0.977353	0.569873	0.00752415		0.976822	-0.09253	0.0162629		0.977018	-0.023391	0.00615625		0.975847	-0.019017	0.00663917
0.977786	-0.270091	0.0320059			0.978186	0.570576	0.00753477		0.977655	-0.093657	0.0161796		0.97785	-0.023754	0.00615075		0.976678	-0.020565	0.00661307
0.978618	-0.270686	0.0319584			0.979018	0.571544	0.00754938		0.978487	-0.093439	0.0161957		0.978682	-0.024422	0.00614064		0.977509	-0.020827	0.00660865
0.97945	-0.269369	0.0320636			0.979851	0.571598	0.0075502		0.979319	-0.093086	0.0162218		0.979515	-0.023151	0.00615988		0.97834	-0.020154	0.00662
0.980282	-0.268253	0.0321527			0.980683	0.573197	0.00757434		0.980151	-0.093413	0.0161976		0.980347	-0.02133	0.00618745		0.979171	-0.019338	0.00663376
0.981114	-0.268885	0.0321022			0.981516	0.573722	0.00758227		0.980983	-0.094095	0.0161472		0.981179	-0.02079	0.00619562		0.980003	-0.018507	0.00664777
0.981947	-0.268758	0.0321123			0.982348	0.572586	0.00756512		0.981815	-0.094271	0.0161342		0.982011	-0.018591	0.00622891		0.980834	-0.018206	0.00665284
0.982779	-0.267724	0.0321949			0.983181	0.571079	0.00754236		0.982647	-0.094781	0.0160965		0.982844	-0.018095	0.00623642		0.981665	-0.018823	0.00664244
0.983611	-0.267694	0.0321973			0.984013	0.569775	0.00752267		0.983479	-0.094679	0.016104		0.983676	-0.0169	0.00625451		0.982496	-0.019238	0.00663544
0.984443	-0.267396	0.0322211			0.984846	0.568088	0.0074972		0.984311	-0.094405	0.0161243		0.984508	-0.01623	0.00626465		0.983328	-0.020132	0.00662037
0.985275	-0.266862	0.0322637			0.985678	0.567856	0.0074937		0.985143	-0.094362	0.0161275		0.98534	-0.016365	0.00626261		0.984159	-0.018718	0.00664421
0.986107	-0.266957	0.0322561			0.986511	0.567291	0.00748517		0.985975	-0.093636	0.0161811		0.986172	-0.015565	0.00627472		0.98499	-0.017383	0.00666672
0.98694	-0.267509	0.032212			0.987343	0.566727	0.00747665		0.986807	-0.093037	0.0162254		0.987005	-0.015146	0.00628107		0.985821	-0.018052	0.00665544
0.987772	-0.268739	0.0321139			0.988176	0.566816	0.00747799		0.987639	-0.091929	0.0163073		0.987837	-0.015473	0.00627611		0.986652	-0.019468	0.00663157
0.988604	-0.268794	0.0321095			0.989008	0.566587	0.00747454		0.988471	-0.091941	0.0163065		0.988669	-0.014352	0.00629309		0.987484	-0.019513	0.00663081
0.989436	-0.270421	0.0319796			0.989841	0.566514	0.00747343		0.989303	-0.091794	0.0163173		0.989501	-0.013156	0.00631119		0.988315	-0.019876	0.00662469
0.990268	-0.270455	0.0319769			0.990673	0.566769	0.00747728		0.990135	-0.090896	0.0163837		0.990333	-0.011926	0.00632981		0.989146	-0.021152	0.00660317
0.9911	-0.271321	0.0319077			0.991506	0.566867	0.00747876		0.990967	-0.090557	0.0164088		0.991166	-0.011459	0.00633688		0.989977	-0.022247	0.00658471
0.991933	-0.27159	0.0318863			0.992338	0.565837	0.00746321		0.991799	-0.089575	0.0164814		0.991998	-0.011721	0.00633291		0.990808	-0.021817	0.00659196
0.992765	-0.26934	0.0320659			0.993171	0.567204	0.00748385		0.992631	-0.089565	0.0164821		0.99283	-0.009536	0.00636599		0.99164	-0.021774	0.00659268
0.993597	-0.270267	0.0319919			0.994003	0.56809	0.00749723		0.993463	-0.089656	0.0164754		0.993662	-0.009624	0.00636466		0.992471	-0.023231	0.00656812
0.994429	-0.270799	0.0319494			0.994836	0.569135	0.00751301		0.994295	-0.088704	0.0165458		0.994494	-0.009879	0.0063608		0.993302	-0.023893	0.00655695
0.995261	-0.269985	0.0320144			0.995668	0.569839	0.00752364		0.995127	-0.088596	0.0165538		0.995327	-0.010472	0.00635182		0.994133	-0.023487	0.0065638
0.996093	-0.268462	0.032136			0.996501	0.570914	0.00753987		0.99596	-0.090224	0.0164334		0.996159	-0.010465	0.00635193		0.994965	-0.023875	0.00655726
0.996925	-0.26796	0.032176			0.997333	0.571762	0.00755267		0.996792	-0.088913	0.0165304		0.996991	-0.009853	0.00636119		0.995796	-0.023706	0.00656011
0.997758	-0.267644	0.0322013			0.998166	0.571366	0.00754669		0.997624	-0.08807	0.0165927		0.997823	-0.010474	0.00635179		0.996627	-0.023297	0.006567
0.99859	-0.267845	0.0321852			0.998998	0.571266	0.00754518		0.998456	-0.087403	0.016642		0.998656	-0.01057	0.00635034		0.997458	-0.023617	0.00656161
0.999422	-0.269009	0.0320923			0.999831	0.571531	0.00754919		0.999288	-0.087236	0.0166543		0.999488	-0.009636	0.00636448		0.998289	-0.023739	0.00655955
1.00025	-0.270326	0.0319872			1.00066	0.572137	0.00755834		1.00012	-0.088091	0.0165911		1.00032	-0.008397	0.00638324		0.999121	-0.024735	0.00654276
1.00109	-0.271029	0.0319311			1.0015	0.571826	0.00755364		1.00095	-0.088533	0.0165584		1.00115	-0.009304	0.0063695		0.999952	-0.024933	0.00653942
1.00192	-0.271346	0.0319058			1.00233	0.57179	0.0075531		1.00178	-0.087965	0.0166004		1.00198	-0.008318	0.00638443		1.00078	-0.024892	0.00654011
1.00275	-0.271615	0.0318843			1.00316	0.574261	0.00759041		1.00262	-0.08785	0.0166089		1.00282	-0.008536	0.00638113		1.00161	-0.025892	0.00652325
1.00358	-0.271391	0.0319022			1.00399	0.575695	0.00761206		1.00345	-0.088742	0.016543		1.00365	-0.007929	0.00639032		1.00245	-0.026647	0.00651052
1.00442	-0.27144	0.0318982			1.00483	0.575833	0.00761414		1.00428	-0.090131	0.0164403		1.00448	-0.007807	0.00639217		1.00328	-0.026895	0.00650634
1.00525	-0.27261	0.0318049			1.00566	0.575131	0.00760354		1.00511	-0.090955	0.0163794		1.00531	-0.00733	0.00639939		1.00411	-0.025768	0.00652534
1.00608	-0.273824	0.0317079			1.00649	0.574364	0.00759196		1.00594	-0.091336	0.0163512		1.00615	-0.006361	0.00641406		1.00494	-0.026637	0.00651069
1.00691	-0.274967	0.0316167			1.00732	0.574622	0.00759586		1.00678	-0.092046	0.0162987		1.00698	-0.005333	0.00642962		1.00577	-0.027215	0.00650094
1.00774	-0.27401	0.0316931			1.00815	0.575047	0.00760227		1.00761	-0.093237	0.0162106		1.00781	-0.005222	0.0064313		1.0066	-0.026209	0.0065179
1.00858	-0.272599	0.0318057			1.00899	0.575117	0.00760333		1.00844	-0.094098	0.016147		1.00864	-0.004971	0.0064351		1.00743	-0.025124	0.0065362
1.00941	-0.271924	0.0318596			1.00982	0.575805	0.00761372		1.00927	-0.094712	0.0161016		1.00947	-0.004434	0.00644323		1.00826	-0.024564	0.00654564
1.01024	-0.272066	0.0318483			1.01065	0.575583	0.00761037		1.0101	-0.095959	0.0160094		1.01031	-0.004979	0.00643498		1.0091	-0.024025	0.00655473
1.01107	-0.2716	0.0318855			1.01148	0.574869	0.00759959		1.01094	-0.096559	0.015965		1.01114	-0.004898	0.0064362		1.00993	-0.02349	0.00656375
1.0119	-0.271386	0.0319026			1.01232	0.575028	0.00760199		1.01177	-0.096552	0.0159655		1.01197	-0.004483	0.00644249		1.01076	-0.023516	0.00656331
1.01274	-0.271552	0.0318893			1.01315	0.574858	0.00759942		1.0126	-0.096687	0.0159555		1.0128	-0.002622	0.00647066		1.01159	-0.024009	0.006555
1.01357	-0.272639	0.0318025			1.01398	0.573689	0.00758177		1.01343	-0.097391	0.0159035		1.01364	-0.002342	0.0064749		1.01242	-0.023982	0.00655545
1.0144	-0.271737	0.0318745			1.01482	0.572162	0.00755871		1.01426	-0.097703	0.0158804		1.01447	-0.001961	0.00648067		1.01325	-0.023338	0.00656631
1.01523	-0.271243	0.031914			1.01565	0.571412	0.00754739		1.0151	-0.098131	0.0158488		1.0153	-0.001891	0.00648173		1.01408	-0.022046	0.0065881
1.01606	-0.272936	0.0317788			1.01648	0.571236	0.00754473		1.01593	-0.09751	0.0158947		1.01613	-0.000914	0.00649652		1.01491	-0.021673	0.00659439
1.0169	-0.274389	0.0316628			1.01731	0.570934	0.00754017		1.01676	-0.095827	0.0160191		1.01696	0.000349	0.00651564		1.01574	-0.021724	0.00659353
1.01773	-0.274809	0.0316293			1.01815	0.571985	0.00755604		1.01759	-0.095668	0.0160309		1.0178	0.000213	0.00651358		1.01658	-0.022226	0.00658506
1.01856	-0.27503	0.0316117			1.01898	0.572419	0.00756259		1.01842	-0.096012	0.0160055		1.01863	0.00109	0.00652685		1.01741	-0.022547	0.00657965
1.01939	-0.275447	0.0315784			1.01981	0.572255	0.00756012		1.01926	-0.095864	0.0160164		1.01946	0.002122	0.00654248		1.01824	-0.022521	0.00658009
1.02023	-0.2754	0.0315821			1.02064	0.570819	0.00753844		1.02009	-0.096238	0.0159887		1.02029	0.002141	0.00654276		1.01907	-0.023213	0.00656842
1.02106	-0.275823	0.0315484			1.02147	0.568828	0.00750837		1.02092	-0.096742	0.0159515		1.02113	0.001226	0.00652891		1.0199	-0.022774	0.00657582
1.02189	-0.276523	0.0314925			1.02231	0.567648	0.00749056		1.02175	-0.097605	0.0158877		1.02196	0.003171	0.00655836		1.02073	-0.023284	0.00656722
1.02272	-0.276208	0.0315176			1.02314	0.567576	0.00748947		1.02259	-0.097218	0.0159163		1.02279	0.002485	0.00654797		1.02156	-0.023227	0.00656818
1.02355	-0.276167	0.0315209			1.02397	0.56599	0.00746552		1.02342	-0.09685	0.0159435		1.02362	0.002513	0.0065484		1.02239	-0.023312	0.00656675
1.02439	-0.276321	0.0315086			1.02481	0.565015	0.0074508		1.02425	-0.09684	0.0159442		1.02445	0.002077	0.0065418		1.02323	-0.024214	0.00655154
1.02522	-0.274053	0.0316897			1.02564	0.564978	0.00745024		1.02508	-0.097129	0.0159229		1.02529	0.003283	0.00656005		1.02406	-0.025371	0.00653203
1.02605	-0.272989	0.0317746			1.02647	0.566327	0.00747061		1.02591	-0.096585	0.0159631		1.02612	0.00344	0.00656243		1.02489	-0.02751	0.00649597
1.02688	-0.272842	0.0317863			1.0273	0.567141	0.0074829		1.02675	-0.096241	0.0159885		1.02695	0.003051	0.00655654		1.02572	-0.027893	0.00648951
1.02771	-0.272149	0.0318417			1.02814	0.566788	0.00747757		1.02758	-0.095125	0.016071		1.02778	0.00287	0.0065538		1.02655	-0.027622	0.00649408
1.02855	-0.271076	0.0319273			1.02897	0.566578	0.0074744		1.02841	-0.093686	0.0161774		1.02862	0.002729	0.00655167		1.02738	-0.028492	0.00647941
1.02938	-0.271178	0.0319192			1.0298	0.567787	0.00749266		1.02924	-0.093143	0.0162176		1.02945	0.00404	0.00657151		1.02821	-0.029818	0.00645705
1.03021	-0.271748	0.0318737			1.03063	0.566308	0.00747032		1.03007	-0.091843	0.0163137		1.03028	0.005012	0.00658623		1.02904	-0.030265	0.00644951
1.03104	-0.2711	0.0319254			1.03147	0.56679	0.0074776		1.0309	-0.090727	0.0163962		1.03111	0.006894	0.00661472		1.02988	-0.030425	0.00644681
1.03188	-0.272767	0.0317923			1.0323	0.566968	0.00748029		1.03174	-0.090407	0.0164199		1.03194	0.007174	0.00661896		1.03071	-0.029926	0.00645523
1.03271	-0.273441	0.0317385			1.03313	0.566112	0.00746736		1.03257	-0.090973	0.016378		1.03278	0.0083	0.006636		1.03154	-0.030046	0.0064532
1.03354	-0.273283	0.0317511			1.03396	0.566253	0.00746949		1.0334	-0.091891	0.0163102		1.03361	0.007378	0.00662205		1.03237	-0.029881	0.00645599
1.03437	-0.272671	0.0318			1.0348	0.566265	0.00746967		1.03423	-0.090594	0.0164061		1.03444	0.007369	0.00662191		1.0332	-0.030429	0.00644675
1.0352	-0.273666	0.0317206			1.03563	0.566073	0.00746678		1.03507	-0.089454	0.0164903		1.03527	0.007849	0.00662918		1.03403	-0.030313	0.0064487
1.03604	-0.273058	0.0317691			1.03646	0.566475	0.00747284		1.0359	-0.089598	0.0164797		1.03611	0.009168	0.00664914		1.03486	-0.031377	0.00643076
1.03687	-0.271855	0.0318651			1.03729	0.564352	0.00744079		1.03673	-0.091265	0.0163564		1.03694	0.009082	0.00664784		1.03569	-0.032287	0.00641542
1.0377	-0.272437	0.0318187			1.03813	0.564492	0.0074429		1.03756	-0.092658	0.0162534		1.03777	0.008211	0.00663466		1.03652	-0.033321	0.00639798
1.03853	-0.273353	0.0317455			1.03896	0.563141	0.0074225		1.03839	-0.093584	0.016185		1.0386	0.009373	0.00665225		1.03736	-0.032429	0.00641302
1.03937	-0.273752	0.0317137			1.03979	0.564292	0.00743988		1.03923	-0.094203	0.0161392		1.03943	0.009802	0.00665874		1.03819	-0.031462	0.00642933
1.0402	-0.273308	0.0317491			1.04062	0.56389	0.00743381		1.04006	-0.093993	0.0161547		1.04027	0.010605	0.0066709		1.03902	-0.031597	0.00642705
1.04103	-0.273669	0.0317203			1.04146	0.56491	0.00744921		1.04089	-0.092033	0.0162997		1.0411	0.011658	0.00668684		1.03985	-0.030627	0.00644341
1.04186	-0.272893	0.0317823			1.04229	0.565336	0.00745565		1.04172	-0.090491	0.0164137		1.04193	0.013435	0.00671374		1.04068	-0.03139	0.00643054
1.04269	-0.27325	0.0317538			1.04312	0.564792	0.00744743		1.04255	-0.089298	0.0165019		1.04276	0.012954	0.00670646		1.04151	-0.031757	0.00642435
1.04353	-0.273387	0.0317428			1.04395	0.563893	0.00743386		1.04339	-0.089329	0.0164996		1.0436	0.014974	0.00673704		1.04234	-0.033075	0.00640213
1.04436	-0.274239	0.0316748			1.04479	0.563495	0.00742785		1.04422	-0.089081	0.0165179		1.04443	0.016277	0.00675676		1.04317	-0.033327	0.00639788
1.04519	-0.275036	0.0316112			1.04562	0.563024	0.00742074		1.04505	-0.088228	0.016581		1.04526	0.017391	0.00677363		1.04401	-0.03299	0.00640356
1.04602	-0.27746	0.0314177			1.04645	0.563073	0.00742148		1.04588	-0.086951	0.0166754		1.04609	0.017882	0.00678106		1.04484	-0.032963	0.00640402
1.04686	-0.278083	0.031368			1.04728	0.562051	0.00740605		1.04671	-0.088013	0.0165969		1.04692	0.019245	0.00680169		1.04567	-0.03278	0.00640711
1.04769	-0.278073	0.0313688			1.04811	0.560184	0.00737786		1.04755	-0.088685	0.0165472		1.04776	0.020658	0.00682308		1.0465	-0.03156	0.00642768
1.04852	-0.277789	0.0313914			1.04895	0.559712	0.00737073		1.04838	-0.090101	0.0164425		1.04859	0.020617	0.00682246		1.04733	-0.032829	0.00640628
1.04935	-0.279852	0.0312267			1.04978	0.559194	0.00736291		1.04921	-0.09035	0.0164241		1.04942	0.020953	0.00682755		1.04816	-0.033775	0.00639033
1.05018	-0.280636	0.0311642			1.05061	0.558235	0.00734843		1.05004	-0.0897	0.0164722		1.05025	0.020447	0.00681989		1.04899	-0.0328	0.00640677
1.05102	-0.28132	0.0311096			1.05144	0.558378	0.00735059		1.05088	-0.090185	0.0164363		1.05109	0.020395	0.0068191		1.04983	-0.033997	0.00638659
1.05185	-0.280357	0.0311864			1.05228	0.557504	0.00733739		1.05171	-0.090356	0.0164237		1.05192	0.021772	0.00683995		1.05066	-0.034724	0.00637433
1.05268	-0.279927	0.0312208			1.05311	0.557187	0.0073326		1.05254	-0.090745	0.0163949		1.05275	0.022129	0.00684535		1.05149	-0.036386	0.0063463
1.05351	-0.27972	0.0312373			1.05394	0.557521	0.00733765		1.05337	-0.091706	0.0163238		1.05358	0.02306	0.00685945		1.05232	-0.037414	0.00632897
1.05434	-0.280784	0.0311523			1.05478	0.556502	0.00732226		1.0542	-0.092034	0.0162996		1.05441	0.024729	0.00688471		1.05315	-0.037568	0.00632637
1.05518	-0.281832	0.0310687			1.05561	0.555331	0.00730458		1.05503	-0.092552	0.0162613		1.05525	0.025736	0.00689996		1.05398	-0.038542	0.00630995
1.05601	-0.282301	0.0310313			1.05644	0.554479	0.00729172		1.05587	-0.093559	0.0161868		1.05608	0.027268	0.00692315		1.05481	-0.039134	0.00629997
1.05684	-0.283164	0.0309624			1.05727	0.554801	0.00729658		1.0567	-0.092927	0.0162336		1.05691	0.028595	0.00694324		1.05564	-0.039659	0.00629112
1.05767	-0.284136	0.0308848			1.05811	0.556365	0.00732019		1.05753	-0.09102	0.0163746		1.05774	0.030151	0.00696679		1.05647	-0.038474	0.0063111
1.05851	-0.285012	0.0308148			1.05894	0.555541	0.00730775		1.05836	-0.090107	0.0164421		1.05858	0.031185	0.00698245		1.05731	-0.038583	0.00630926
1.05934	-0.285152	0.0308037			1.05977	0.556252	0.00731849		1.0592	-0.089387	0.0164953		1.05941	0.03126	0.00698358		1.05814	-0.040236	0.00628139
1.06017	-0.284414	0.0308626			1.0606	0.554344	0.00728968		1.06003	-0.088698	0.0165462		1.06024	0.03164	0.00698934		1.05897	-0.041543	0.00625935
1.061	-0.283973	0.0308978			1.06143	0.553059	0.00727028		1.06086	-0.089604	0.0164793		1.06107	0.031788	0.00699158		1.0598	-0.041372	0.00626223
1.06183	-0.283678	0.0309213			1.06227	0.552354	0.00725963		1.06169	-0.091571	0.0163338		1.0619	0.031934	0.00699379		1.06063	-0.041627	0.00625793
1.06267	-0.283475	0.0309375			1.0631	0.552082	0.00725552		1.06252	-0.092644	0.0162545		1.06274	0.032247	0.00699853		1.06146	-0.041595	0.00625847
1.0635	-0.282869	0.0309859			1.06393	0.553115	0.00727112		1.06336	-0.093219	0.016212		1.06357	0.033166	0.00701244		1.06229	-0.04072	0.00627323
1.06433	-0.282769	0.0309939			1.06476	0.553142	0.00727153		1.06419	-0.093904	0.0161613		1.0644	0.033236	0.0070135		1.06312	-0.040282	0.00628061
1.06516	-0.28264	0.0310042			1.0656	0.552442	0.00726096		1.06502	-0.094094	0.0161473		1.06523	0.033565	0.00701848		1.06395	-0.040414	0.00627839
1.066	-0.281842	0.0310679			1.06643	0.552991	0.00726925		1.06585	-0.09384	0.0161661		1.06607	0.034398	0.00703109		1.06479	-0.039798	0.00628877
1.06683	-0.281875	0.0310653			1.06726	0.552605	0.00726342		1.06668	-0.093806	0.0161686		1.0669	0.033616	0.00701925		1.06562	-0.039394	0.00629558
1.06766	-0.282942	0.0309801			1.0681	0.55278	0.00726606		1.06751	-0.093348	0.0162024		1.06773	0.033001	0.00700994		1.06645	-0.039041	0.00630154
1.06849	-0.282661	0.0310025			1.06893	0.553401	0.00727544		1.06835	-0.091828	0.0163148		1.06856	0.032633	0.00700437		1.06728	-0.03988	0.00628739
1.06932	-0.282661	0.0310025			1.06976	0.553091	0.00727076		1.06918	-0.091022	0.0163744		1.06939	0.033766	0.00702152		1.06811	-0.039179	0.00629921
1.07015	-0.2831	0.0309675			1.07059	0.552959	0.00726877		1.07001	-0.091988	0.016303		1.07023	0.035553	0.00704857		1.06894	-0.03874	0.00630661
1.07099	-0.282809	0.0309907			1.07143	0.552242	0.00725794		1.07084	-0.09341	0.0161978		1.07106	0.03601	0.00705549		1.06977	-0.038245	0.00631496
1.07182	-0.281513	0.0310942			1.07226	0.551565	0.00724772		1.07168	-0.093757	0.0161722		1.07189	0.036495	0.00706283		1.07061	-0.038497	0.00631071
1.07265	-0.282392	0.031024			1.07309	0.55107	0.00724024		1.07251	-0.093609	0.0161831		1.07272	0.036212	0.00705855		1.07144	-0.038607	0.00630885
1.07348	-0.282222	0.0310376			1.07392	0.55097	0.00723873		1.07334	-0.093188	0.0162143		1.07356	0.037082	0.00707172		1.07227	-0.038473	0.00631111
1.07432	-0.281824	0.0310693			1.07475	0.551169	0.00724174		1.07417	-0.092652	0.0162539		1.07439	0.036702	0.00706597		1.0731	-0.037863	0.0063214
1.07515	-0.280712	0.0311581			1.07559	0.552648	0.00726407		1.075	-0.0928	0.0162429		1.07522	0.037688	0.00708089		1.07393	-0.038516	0.00631039
1.07598	-0.280895	0.0311435			1.07642	0.553758	0.00728083		1.07584	-0.092872	0.0162376		1.07605	0.038516	0.00709343		1.07476	-0.037028	0.00633548
1.07681	-0.282018	0.0310538			1.07725	0.554139	0.00728658		1.07667	-0.092388	0.0162734		1.07688	0.038949	0.00709998		1.07559	-0.036411	0.00634588
1.07764	-0.283268	0.0309541			1.07808	0.55356	0.00727784		1.0775	-0.092853	0.016239		1.07772	0.03901	0.00710091		1.07642	-0.036004	0.00635274
1.07848	-0.282717	0.030998			1.07892	0.552389	0.00726016		1.07833	-0.093954	0.0161576		1.07855	0.038898	0.00709921		1.07726	-0.036695	0.00634109
1.07931	-0.281417	0.0311018			1.07975	0.554082	0.00728572		1.07916	-0.093679	0.016178		1.07938	0.039055	0.00710159		1.07809	-0.035569	0.00636008
1.08014	-0.280975	0.0311371			1.08058	0.553489	0.00727677		1.08	-0.09307	0.016223		1.08021	0.040031	0.00711636		1.07892	-0.034145	0.00638409
1.08097	-0.281404	0.0311029			1.08142	0.55489	0.00729792		1.08083	-0.093087	0.0162217		1.08105	0.04007	0.00711695		1.07975	-0.033294	0.00639844
1.08181	-0.281879	0.0310649			1.08225	0.555846	0.00731236		1.08166	-0.092457	0.0162683		1.08188	0.041217	0.00713432		1.08058	-0.034193	0.00638328
1.08264	-0.282545	0.0310118			1.08308	0.557243	0.00733345		1.08249	-0.091691	0.0163249		1.08271	0.042532	0.00715422		1.08141	-0.035184	0.00636657
1.08347	-0.283054	0.0309711			1.08391	0.556621	0.00732406		1.08332	-0.091051	0.0163723		1.08354	0.043219	0.00716463		1.08224	-0.035086	0.00636822
1.0843	-0.283733	0.0309169			1.08475	0.557212	0.00733298		1.08416	-0.090332	0.0164254		1.08437	0.042381	0.00715194		1.08307	-0.035897	0.00635455
1.08513	-0.284453	0.0308595			1.08558	0.55639	0.00732057		1.08499	-0.090699	0.0163983		1.08521	0.043222	0.00716467		1.0839	-0.036503	0.00634433
1.08597	-0.284319	0.0308702			1.08641	0.556753	0.00732605		1.08582	-0.091501	0.016339		1.08604	0.045078	0.00719277		1.08474	-0.037307	0.00633077
1.0868	-0.285336	0.030789			1.08724	0.556569	0.00732327		1.08665	-0.092027	0.0163001		1.08687	0.045657	0.00720153		1.08557	-0.038423	0.00631196
1.08763	-0.28511	0.030807			1.08807	0.556416	0.00732096		1.08749	-0.093139	0.0162179		1.0877	0.04771	0.00723261		1.0864	-0.037689	0.00632433
1.08846	-0.284646	0.0308441			1.08891	0.55628	0.00731891		1.08832	-0.093853	0.0161651		1.08854	0.048658	0.00724696		1.08723	-0.037076	0.00633467
1.08929	-0.285828	0.0307497			1.08974	0.557161	0.00733221		1.08915	-0.094146	0.0161434		1.08937	0.050303	0.00727187		1.08806	-0.036394	0.00634617
1.09013	-0.285892	0.0307446			1.09057	0.557449	0.00733656		1.08998	-0.093916	0.0161604		1.0902	0.05133	0.00728741		1.08889	-0.03715	0.00633342
1.09096	-0.285966	0.0307387			1.0914	0.557413	0.00733602		1.09081	-0.093428	0.0161965		1.09103	0.052057	0.00729842		1.08972	-0.036626	0.00634226
1.09179	-0.287217	0.0306388			1.09224	0.558629	0.00735438		1.09164	-0.09356	0.0161868		1.09186	0.055261	0.00734692		1.09055	-0.038495	0.00631074
1.09262	-0.289012	0.0304955			1.09307	0.559163	0.00736244		1.09248	-0.094481	0.0161187		1.0927	0.055551	0.00735131		1.09139	-0.037482	0.00632782
1.09346	-0.289792	0.0304333			1.0939	0.559298	0.00736448		1.09331	-0.095765	0.0160237		1.09353	0.056361	0.00736358		1.09222	-0.038065	0.00631799
1.09429	-0.29	0.0304167			1.09474	0.56007	0.00737614		1.09414	-0.09676	0.0159501		1.09436	0.057611	0.0073825		1.09305	-0.035819	0.00635586
1.09512	-0.290983	0.0303382			1.09557	0.55897	0.00735953		1.09497	-0.096502	0.0159692		1.09519	0.05965	0.00741337		1.09388	-0.036934	0.00633706
1.09595	-0.291556	0.0302925			1.0964	0.559128	0.00736191		1.0958	-0.095453	0.0160468		1.09603	0.059467	0.0074106		1.09471	-0.037658	0.00632486
1.09678	-0.2908	0.0303528			1.09723	0.559508	0.00736765		1.09664	-0.095305	0.0160577		1.09686	0.060682	0.00742899		1.09554	-0.038231	0.00631519
1.09762	-0.291307	0.0303123			1.09807	0.560029	0.00737552		1.09747	-0.095796	0.0160214		1.09769	0.061885	0.0074472		1.09637	-0.038745	0.00630653
1.09845	-0.290499	0.0303768			1.0989	0.560066	0.00737607		1.0983	-0.096328	0.0159821		1.09852	0.063339	0.00746921		1.0972	-0.039897	0.0062871
1.09928	-0.291313	0.0303119			1.09973	0.56069	0.0073855		1.09913	-0.095866	0.0160162		1.09935	0.064369	0.0074848		1.09804	-0.040869	0.00627071
1.10011	-0.291134	0.0303261			1.10056	0.559651	0.00736981		1.09997	-0.096906	0.0159394		1.10019	0.065498	0.0075019		1.09887	-0.042484	0.00624348
1.10095	-0.291808	0.0302723			1.10139	0.559034	0.00736049		1.1008	-0.097498	0.0158956		1.10102	0.066063	0.00751045		1.0997	-0.043826	0.00622085
1.10178	-0.292946	0.0301815			1.10223	0.557938	0.00734394		1.10163	-0.0971	0.015925		1.10185	0.067086	0.00752594		1.10053	-0.044498	0.00620952
1.10261	-0.294265	0.0300762			1.10306	0.556289	0.00731905		1.10246	-0.097506	0.015895		1.10268	0.068641	0.00754948		1.10136	-0.044371	0.00621166
1.10344	-0.294536	0.0300546			1.10389	0.555118	0.00730136		1.10329	-0.098867	0.0157944		1.10351	0.069645	0.00756468		1.10219	-0.04241	0.00624473
1.10427	-0.295866	0.0299484			1.10472	0.556533	0.00732273		1.10413	-0.10102	0.0156352		1.10435	0.070087	0.00757137		1.10302	-0.042572	0.006242
1.10511	-0.296946	0.0298622			1.10556	0.55549	0.00730698		1.10496	-0.102637	0.0155156		1.10518	0.071715	0.00759601		1.10385	-0.043247	0.00623062
1.10594	-0.297128	0.0298477			1.10639	0.555939	0.00731376		1.10579	-0.103091	0.015482		1.10601	0.073599	0.00762453		1.10468	-0.043425	0.00622762
1.10677	-0.297508	0.0298173			1.10722	0.556799	0.00732675		1.10662	-0.103228	0.0154719		1.10684	0.073321	0.00762033		1.10552	-0.044725	0.0062057
1.1076	-0.298099	0.0297702			1.10806	0.555732	0.00731064		1.10745	-0.103505	0.0154514		1.10767	0.073446	0.00762222		1.10635	-0.043992	0.00621805
1.10844	-0.298812	0.0297132			1.10889	0.555769	0.00731119		1.10829	-0.103318	0.0154653		1.10851	0.073756	0.00762691		1.10718	-0.046479	0.00617612
1.10927	-0.299412	0.0296653			1.10972	0.554613	0.00729374		1.10912	-0.102839	0.0155007		1.10934	0.074922	0.00764456		1.10801	-0.047471	0.00615939
1.1101	-0.29962	0.0296487			1.11055	0.554043	0.00728513		1.10995	-0.1031	0.0154814		1.11017	0.075682	0.00765607		1.10884	-0.047437	0.00615997
1.11093	-0.29956	0.0296535			1.11139	0.553919	0.00728326		1.11078	-0.103484	0.015453		1.111	0.076008	0.007661		1.10967	-0.047013	0.00616712
1.11176	-0.299605	0.0296499			1.11222	0.553967	0.00728399		1.11161	-0.104262	0.0153955		1.11184	0.076253	0.00766471		1.1105	-0.048683	0.00613896
1.1126	-0.29933	0.0296719			1.11305	0.553318	0.00727419		1.11245	-0.104469	0.0153801		1.11267	0.076305	0.0076655		1.11133	-0.048971	0.0061341
1.11343	-0.299586	0.0296514			1.11388	0.552192	0.00725718		1.11328	-0.103622	0.0154428		1.1135	0.077153	0.00767834		1.11217	-0.050791	0.00610341
1.11426	-0.300221	0.0296008			1.11471	0.550995	0.00723911		1.11411	-0.102869	0.0154985		1.11433	0.077952	0.00769043		1.113	-0.05134	0.00609416
1.11509	-0.301485	0.0294999			1.11555	0.550797	0.00723612		1.11494	-0.102523	0.015524		1.11516	0.077616	0.00768535		1.11383	-0.052932	0.00606731
1.11592	-0.30186	0.0294699			1.11638	0.552081	0.00725551		1.11577	-0.102271	0.0155427		1.116	0.076464	0.00766791		1.11466	-0.053175	0.00606322
1.11676	-0.301292	0.0295153			1.11721	0.550823	0.00723651		1.11661	-0.102517	0.0155245		1.11683	0.076216	0.00766415		1.11549	-0.053049	0.00606534
1.11759	-0.301905	0.0294663			1.11804	0.550023	0.00722443		1.11744	-0.102765	0.0155061		1.11766	0.076196	0.00766385		1.11632	-0.054395	0.00604264
1.11842	-0.301361	0.0295098			1.11888	0.549593	0.00721794		1.11827	-0.102924	0.0154944		1.11849	0.074792	0.00764259		1.11715	-0.054488	0.00604108
1.11925	-0.300481	0.02958			1.11971	0.548753	0.00720526		1.1191	-0.102789	0.0155044		1.11933	0.074696	0.00764114		1.11798	-0.052586	0.00607315
1.12008	-0.300803	0.0295543			1.12054	0.549559	0.00721743		1.11993	-0.102752	0.0155071		1.12016	0.075803	0.0076579		1.11882	-0.052522	0.00607423
1.12092	-0.301548	0.0294948			1.12138	0.548454	0.00720074		1.12077	-0.10295	0.0154925		1.12099	0.077191	0.00767891		1.11965	-0.052461	0.00607525
1.12175	-0.301781	0.0294762			1.12221	0.548517	0.0072017		1.1216	-0.102382	0.0155345		1.12182	0.077604	0.00768516		1.12048	-0.053058	0.00606519
1.12258	-0.30203	0.0294564			1.12304	0.54815	0.00719615		1.12243	-0.102915	0.0154951		1.12265	0.078122	0.00769301		1.12131	-0.054802	0.00603578
1.12341	-0.302656	0.0294064			1.12387	0.54847	0.00720099		1.12326	-0.102965	0.0154914		1.12349	0.078538	0.0076993		1.12214	-0.05536	0.00602637
1.12425	-0.303077	0.0293728			1.12471	0.548693	0.00720435		1.1241	-0.102829	0.0155014		1.12432	0.078861	0.00770419		1.12297	-0.056008	0.00601545
1.12508	-0.302559	0.0294141			1.12554	0.548232	0.00719739		1.12493	-0.102036	0.01556		1.12515	0.079551	0.00771464		1.1238	-0.056354	0.00600961
1.12591	-0.301263	0.0295176			1.12637	0.548622	0.00720328		1.12576	-0.10139	0.0156078		1.12598	0.079343	0.00771149		1.12463	-0.055478	0.00602438
1.12674	-0.301214	0.0295215			1.1272	0.547893	0.00719227		1.12659	-0.101844	0.0155742		1.12682	0.078745	0.00770244		1.12546	-0.055113	0.00603054
1.12757	-0.301961	0.0294619			1.12803	0.547725	0.00718974		1.12742	-0.101324	0.0156127		1.12765	0.079894	0.00771983		1.1263	-0.053445	0.00605866
1.12841	-0.30162	0.0294891			1.12887	0.547976	0.00719353		1.12826	-0.100925	0.0156422		1.12848	0.079671	0.00771645		1.12713	-0.05433	0.00604374
1.12924	-0.300602	0.0295703			1.1297	0.546655	0.00717358		1.12909	-0.100463	0.0156763		1.12931	0.079548	0.00771459		1.12796	-0.054064	0.00604823
1.13007	-0.30001	0.0296176			1.13053	0.547088	0.00718012		1.12992	-0.100322	0.0156868		1.13014	0.079647	0.00771609		1.12879	-0.053475	0.00605816
1.1309	-0.299529	0.029656			1.13136	0.546334	0.00716873		1.13075	-0.100677	0.0156605		1.13098	0.079776	0.00771804		1.12962	-0.054414	0.00604232
1.13173	-0.300644	0.029567			1.1322	0.544672	0.00714364		1.13158	-0.100767	0.0156539		1.13181	0.079686	0.00771668		1.13045	-0.055927	0.00601681
1.13257	-0.301807	0.0294742			1.13303	0.543237	0.00712197		1.13241	-0.099919	0.0157166		1.13264	0.079461	0.00771328		1.13128	-0.056016	0.00601531
1.1334	-0.302112	0.0294498			1.13386	0.541622	0.00709759		1.13325	-0.099053	0.0157806		1.13347	0.079493	0.00771376		1.13211	-0.057308	0.00599353
1.13423	-0.302474	0.0294209			1.1347	0.541232	0.0070917		1.13408	-0.099116	0.0157759		1.13431	0.080251	0.00772524		1.13295	-0.057987	0.00598208
1.13506	-0.302433	0.0294242			1.13553	0.542172	0.00710589		1.13491	-0.099702	0.0157326		1.13514	0.081031	0.00773704		1.13378	-0.057533	0.00598973
1.1359	-0.301281	0.0295161			1.13636	0.541473	0.00709534		1.13574	-0.099645	0.0157368		1.13597	0.083025	0.00776723		1.13461	-0.057245	0.00599459
1.13673	-0.301033	0.0295359			1.13719	0.540014	0.00707331		1.13657	-0.099489	0.0157484		1.1368	0.083863	0.00777992		1.13544	-0.056949	0.00599958
1.13756	-0.302215	0.0294416			1.13803	0.539721	0.00706888		1.13741	-0.099618	0.0157388		1.13763	0.085257	0.00780102		1.13627	-0.056458	0.00600786
1.13839	-0.303016	0.0293776			1.13886	0.539433	0.00706454		1.13824	-0.099644	0.0157369		1.13847	0.08629	0.00781666		1.1371	-0.056917	0.00600012
1.13922	-0.30365	0.029327			1.13969	0.539121	0.00705982		1.13907	-0.098973	0.0157865		1.1393	0.088741	0.00785376		1.13793	-0.057462	0.00599093
1.14006	-0.304747	0.0292395			1.14052	0.539201	0.00706103		1.1399	-0.098235	0.0158411		1.14013	0.090379	0.00787856		1.13877	-0.059554	0.00595566
1.14089	-0.304867	0.0292299			1.14135	0.538803	0.00705502		1.14074	-0.098616	0.0158129		1.14096	0.090012	0.007873		1.1396	-0.059123	0.00596292
1.14172	-0.305099	0.0292114			1.14219	0.538655	0.00705279		1.14157	-0.098022	0.0158568		1.1418	0.089396	0.00786368		1.14043	-0.058967	0.00596555
1.14255	-0.304082	0.0292925			1.14302	0.537878	0.00704106		1.1424	-0.097305	0.0159099		1.14263	0.089254	0.00786153		1.14126	-0.059681	0.00595352
1.14339	-0.302633	0.0294082			1.14385	0.537543	0.007036		1.14323	-0.096796	0.0159475		1.14346	0.088745	0.00785382		1.14209	-0.058847	0.00596758
1.14422	-0.301807	0.0294742			1.14468	0.537329	0.00703277		1.14406	-0.096038	0.0160035		1.14429	0.088382	0.00784833		1.14292	-0.058499	0.00597345
1.14505	-0.301623	0.0294888			1.14552	0.535962	0.00701213		1.1449	-0.095455	0.0160466		1.14512	0.08922	0.00786101		1.14375	-0.058659	0.00597075
1.14588	-0.302158	0.0294461			1.14635	0.536112	0.00701439		1.14573	-0.095535	0.0160407		1.14596	0.090735	0.00788395		1.14458	-0.057977	0.00598225
1.14671	-0.302935	0.0293841			1.14718	0.534626	0.00699195		1.14656	-0.095555	0.0160392		1.14679	0.092681	0.00791341		1.14541	-0.059111	0.00596313
1.14755	-0.303137	0.029368			1.14802	0.534788	0.0069944		1.14739	-0.094711	0.0161016		1.14762	0.09296	0.00791763		1.14625	-0.059803	0.00595146
1.14838	-0.302847	0.0293911			1.14885	0.535422	0.00700397		1.14822	-0.09467	0.0161047		1.14845	0.091998	0.00790307		1.14708	-0.060644	0.00593728
1.14921	-0.303229	0.0293606			1.14968	0.535096	0.00699905		1.14906	-0.095395	0.0160511		1.14929	0.093696	0.00792877		1.14791	-0.059854	0.0059506
1.15004	-0.304469	0.0292617			1.15051	0.53589	0.00701104		1.14989	-0.096845	0.0159439		1.15012	0.095176	0.00795118		1.14874	-0.060142	0.00594574
1.15088	-0.305379	0.029189			1.15135	0.536398	0.00701871		1.15072	-0.097996	0.0158588		1.15095	0.096389	0.00796954		1.14957	-0.060363	0.00594202
1.15171	-0.305153	0.0292071			1.15218	0.536781	0.00702449		1.15155	-0.098725	0.0158049		1.15178	0.097868	0.00799193		1.1504	-0.060686	0.00593657
1.15254	-0.305678	0.0291651			1.15301	0.538214	0.00704613		1.15238	-0.098578	0.0158157		1.15261	0.098706	0.00800462		1.15123	-0.059468	0.00595711
1.15337	-0.305886	0.0291485			1.15384	0.538964	0.00705745		1.15322	-0.098037	0.0158557		1.15345	0.098799	0.00800602		1.15206	-0.05855	0.00597259
1.1542	-0.30505	0.0292153			1.15467	0.539818	0.00707035		1.15405	-0.098728	0.0158046		1.15428	0.098779	0.00800572		1.1529	-0.057348	0.00599285
1.15504	-0.304292	0.0292758			1.15551	0.540165	0.00707559		1.15488	-0.099313	0.0157614		1.15511	0.098259	0.00799785		1.15373	-0.05605	0.00601474
1.15587	-0.305557	0.0291748			1.15634	0.540498	0.00708062		1.15571	-0.098404	0.0158286		1.15594	0.097286	0.00798312		1.15456	-0.056734	0.00600321
1.1567	-0.307532	0.0290171			1.15717	0.539993	0.00707299		1.15654	-0.098077	0.0158528		1.15678	0.096316	0.00796844		1.15539	-0.058006	0.00598176
1.15753	-0.308288	0.0289568			1.158	0.53995	0.00707234		1.15738	-0.099102	0.015777		1.15761	0.096445	0.00797039		1.15622	-0.057962	0.0059825
1.15836	-0.308848	0.0289121			1.15884	0.540703	0.00708371		1.15821	-0.09932	0.0157609		1.15844	0.096864	0.00797673		1.15705	-0.057937	0.00598292
1.1592	-0.3094	0.028868			1.15967	0.539504	0.00706561		1.15904	-0.098301	0.0158362		1.15927	0.096696	0.00797419		1.15788	-0.057016	0.00599845
1.16003	-0.309623	0.0288502			1.1605	0.538878	0.00705616		1.15987	-0.097984	0.0158596		1.1601	0.096416	0.00796995		1.15871	-0.057977	0.00598225
1.16086	-0.309998	0.0288203			1.16134	0.538625	0.00705234		1.16071	-0.098829	0.0157972		1.16094	0.095644	0.00795826		1.15955	-0.05713	0.00599653
1.16169	-0.311163	0.0287273			1.16217	0.537144	0.00702997		1.16154	-0.099562	0.015743		1.16177	0.095814	0.00796084		1.16038	-0.057696	0.00598699
1.16253	-0.311368	0.0287109			1.163	0.538624	0.00705232		1.16237	-0.099749	0.0157291		1.1626	0.09721	0.00798197		1.16121	-0.057162	0.00599599
1.16336	-0.311848	0.0286726			1.16383	0.537697	0.00703832		1.1632	-0.100955	0.01564		1.16343	0.098934	0.00800807		1.16204	-0.057044	0.00599798
1.16419	-0.31439	0.0284697			1.16467	0.538523	0.0070508		1.16403	-0.101189	0.0156227		1.16427	0.100048	0.00802493		1.16287	-0.056554	0.00600624
1.16502	-0.316478	0.028303			1.1655	0.539216	0.00706126		1.16487	-0.101002	0.0156365		1.1651	0.100279	0.00802843		1.1637	-0.057511	0.0059901
1.16585	-0.3178	0.0281975			1.16633	0.539967	0.0070726		1.1657	-0.100563	0.015669		1.16593	0.099994	0.00802411		1.16453	-0.057412	0.00599177
1.16669	-0.317996	0.0281818			1.16716	0.539384	0.0070638		1.16653	-0.100536	0.015671		1.16676	0.099208	0.00801222		1.16536	-0.058857	0.00596741
1.16752	-0.317914	0.0281884			1.16799	0.540543	0.0070813		1.16736	-0.099409	0.0157543		1.16759	0.098882	0.00800728		1.1662	-0.05825	0.00597764
1.16835	-0.31817	0.028168			1.16883	0.538938	0.00705706		1.16819	-0.098495	0.0158219		1.16843	0.09962	0.00801845		1.16703	-0.057853	0.00598434
1.16918	-0.317658	0.0282088			1.16966	0.538182	0.00704565		1.16902	-0.09801	0.0158577		1.16926	0.100849	0.00803706		1.16786	-0.056748	0.00600297
1.17001	-0.31723	0.028243			1.17049	0.538706	0.00705356		1.16986	-0.097851	0.0158695		1.17009	0.101698	0.00804991		1.16869	-0.058011	0.00598167
1.17085	-0.317045	0.0282578			1.17132	0.539166	0.0070605		1.17069	-0.097111	0.0159242		1.17092	0.100967	0.00803884		1.16952	-0.057409	0.00599182
1.17168	-0.316433	0.0283066			1.17216	0.538778	0.00705465		1.17152	-0.096219	0.0159901		1.17176	0.099328	0.00801403		1.17035	-0.059369	0.00595878
1.17251	-0.316119	0.0283317			1.17299	0.539019	0.00705828		1.17235	-0.096473	0.0159714		1.17259	0.098023	0.00799428		1.17118	-0.059601	0.00595486
1.17334	-0.31539	0.0283899			1.17382	0.538647	0.00705267		1.17318	-0.097104	0.0159247		1.17342	0.097482	0.00798609		1.17201	-0.060347	0.00594229
1.17417	-0.314807	0.0284364			1.17466	0.537968	0.00704242		1.17402	-0.097797	0.0158735		1.17425	0.09833	0.00799892		1.17284	-0.06152	0.00592251
1.17501	-0.315852	0.028353			1.17549	0.538779	0.00705466		1.17485	-0.09763	0.0158858		1.17508	0.099694	0.00801957		1.17368	-0.061339	0.00592556
1.17584	-0.316485	0.0283025			1.17632	0.539441	0.00706466		1.17568	-0.097319	0.0159088		1.17592	0.101765	0.00805093		1.17451	-0.061699	0.00591949
1.17667	-0.315032	0.0284184			1.17715	0.538652	0.00705274		1.17651	-0.096839	0.0159443		1.17675	0.10344	0.00807628		1.17534	-0.061182	0.00592821
1.1775	-0.312939	0.0285855			1.17799	0.537391	0.0070337		1.17735	-0.096653	0.0159581		1.17758	0.104124	0.00808664		1.17617	-0.059812	0.00595131
1.17834	-0.311692	0.0286851			1.17882	0.537249	0.00703156		1.17818	-0.095784	0.0160223		1.17841	0.104561	0.00809325		1.177	-0.059574	0.00595532
1.17917	-0.311184	0.0287256			1.17965	0.536885	0.00702606		1.17901	-0.095863	0.0160165		1.17925	0.105481	0.00810718		1.17783	-0.060579	0.00593837
1.18	-0.311352	0.0287122			1.18048	0.538084	0.00704417		1.17984	-0.09679	0.0159479		1.18008	0.106344	0.00812024		1.17866	-0.060795	0.00593473
1.18083	-0.311982	0.0286619			1.18131	0.538161	0.00704533		1.18067	-0.096943	0.0159366		1.18091	0.106698	0.0081256		1.17949	-0.06001	0.00594797
1.18166	-0.311866	0.0286712			1.18215	0.537433	0.00703434		1.18151	-0.096538	0.0159666		1.18174	0.107177	0.00813285		1.18033	-0.060406	0.00594129
1.1825	-0.310329	0.0287939			1.18298	0.537431	0.00703431		1.18234	-0.095647	0.0160324		1.18257	0.10731	0.00813487		1.18116	-0.060106	0.00594635
1.18333	-0.310495	0.0287806			1.18381	0.535616	0.0070069		1.18317	-0.096697	0.0159548		1.18341	0.10765	0.00814002		1.18199	-0.060152	0.00594557
1.18416	-0.311157	0.0287278			1.18464	0.537123	0.00702966		1.184	-0.097254	0.0159136		1.18424	0.108382	0.0081511		1.18282	-0.059764	0.00595212
1.18499	-0.310328	0.028794			1.18548	0.537429	0.00703428		1.18483	-0.097351	0.0159064		1.18507	0.109257	0.00816434		1.18365	-0.061792	0.00591792
1.18582	-0.308387	0.0289489			1.18631	0.53776	0.00703927		1.18567	-0.098436	0.0158262		1.1859	0.110436	0.00818219		1.18448	-0.060515	0.00593945
1.18666	-0.306804	0.0290753			1.18714	0.537328	0.00703275		1.1865	-0.099138	0.0157743		1.18674	0.111117	0.0081925		1.18531	-0.059659	0.00595389
1.18749	-0.306248	0.0291196			1.18798	0.536794	0.00702469		1.18733	-0.098732	0.0158043		1.18757	0.111376	0.00819642		1.18614	-0.058633	0.00597119
1.18832	-0.306051	0.0291354			1.18881	0.536429	0.00701918		1.18816	-0.098448	0.0158253		1.1884	0.111648	0.00820054		1.18697	-0.057908	0.00598341
1.18915	-0.306141	0.0291282			1.18964	0.53984	0.00707068		1.18899	-0.098812	0.0157984		1.18923	0.111792	0.00820272		1.18781	-0.057215	0.0059951
1.18999	-0.306873	0.0290698			1.19047	0.53983	0.00707053		1.18983	-0.099745	0.0157294		1.19006	0.111466	0.00819778		1.18864	-0.058566	0.00597232
1.19082	-0.307865	0.0289906			1.19131	0.538972	0.00705757		1.19066	-0.100007	0.0157101		1.1909	0.111322	0.0081956		1.18947	-0.057655	0.00598768
1.19165	-0.308461	0.028943			1.19214	0.537692	0.00703825		1.19149	-0.099649	0.0157365		1.19173	0.11272	0.00821677		1.1903	-0.057383	0.00599226
1.19248	-0.308553	0.0289356			1.19297	0.53772	0.00703867		1.19232	-0.099673	0.0157348		1.19256	0.114196	0.00823911		1.19113	-0.054884	0.0060344
1.19331	-0.309075	0.028894			1.1938	0.537597	0.00703681		1.19315	-0.09864	0.0158111		1.19339	0.115569	0.0082599		1.19196	-0.054998	0.00603248
1.19415	-0.309824	0.0288342			1.19463	0.538157	0.00704527		1.19399	-0.097859	0.0158689		1.19423	0.116813	0.00827873		1.19279	-0.054887	0.00603435
1.19498	-0.310045	0.0288165			1.19547	0.538512	0.00705063		1.19482	-0.097566	0.0158906		1.19506	0.117292	0.00828598		1.19362	-0.054621	0.00603883
1.19581	-0.309597	0.0288523			1.1963	0.538101	0.00704442		1.19565	-0.097109	0.0159243		1.19589	0.117218	0.00828486		1.19446	-0.055003	0.00603239
1.19664	-0.30941	0.0288672			1.19713	0.537973	0.00704249		1.19648	-0.097403	0.0159026		1.19672	0.116332	0.00827145		1.19529	-0.0553	0.00602739
1.19748	-0.309903	0.0288279			1.19796	0.536536	0.00702079		1.19731	-0.098481	0.0158229		1.19755	0.11617	0.008269		1.19612	-0.055419	0.00602538
1.19831	-0.311852	0.0286723			1.1988	0.537634	0.00703737		1.19815	-0.099099	0.0157772		1.19839	0.117202	0.00828462		1.19695	-0.056695	0.00600386
1.19914	-0.313972	0.0285031			1.19963	0.538176	0.00704556		1.19898	-0.099123	0.0157754		1.19922	0.117416	0.00828786		1.19778	-0.057138	0.00599639
1.19997	-0.314205	0.0284845			1.20046	0.539274	0.00706213		1.19981	-0.099415	0.0157538		1.20005	0.117085	0.00828285		1.19861	-0.057245	0.00599459
1.2008	-0.314051	0.0284968			1.2013	0.539308	0.00706265		1.20064	-0.099133	0.0157747		1.20088	0.116571	0.00827507		1.19944	-0.05824	0.00597781
1.20164	-0.313763	0.0285197			1.20213	0.539098	0.00705948		1.20148	-0.09885	0.0157956		1.20172	0.116549	0.00827473		1.20027	-0.058765	0.00596896
1.20247	-0.313893	0.0285094			1.20296	0.540093	0.0070745		1.20231	-0.099148	0.0157736		1.20255	0.116569	0.00827504		1.20111	-0.058579	0.0059721
1.2033	-0.314776	0.0284389			1.20379	0.540211	0.00707628		1.20314	-0.10008	0.0157047		1.20338	0.116984	0.00828132		1.20194	-0.058889	0.00596687
1.20413	-0.315525	0.0283791			1.20463	0.541099	0.00708969		1.20397	-0.099498	0.0157477		1.20421	0.11587	0.00826445		1.20277	-0.059272	0.00596041
1.20497	-0.316429	0.0283069			1.20546	0.540753	0.00708447		1.2048	-0.099142	0.015774		1.20504	0.115222	0.00825464		1.2036	-0.059425	0.00595783
1.2058	-0.316789	0.0282782			1.20629	0.538734	0.00705398		1.20564	-0.098737	0.015804		1.20588	0.115854	0.00826421		1.20443	-0.058812	0.00596817
1.20663	-0.317712	0.0282045			1.20712	0.53804	0.0070435		1.20647	-0.097612	0.0158872		1.20671	0.116436	0.00827302		1.20526	-0.058862	0.00596732
1.20746	-0.317945	0.0281859			1.20795	0.538155	0.00704524		1.2073	-0.097655	0.015884		1.20754	0.116361	0.00827189		1.20609	-0.058602	0.00597171
1.20829	-0.31868	0.0281272			1.20879	0.538831	0.00705545		1.20813	-0.098249	0.0158401		1.20837	0.116413	0.00827267		1.20692	-0.059091	0.00596346
1.20913	-0.319296	0.0280781			1.20962	0.539188	0.00706084		1.20896	-0.098869	0.0157942		1.20921	0.116823	0.00827888		1.20776	-0.06005	0.00594729
1.20996	-0.318904	0.0281094			1.21045	0.53697	0.00702735		1.20979	-0.09851	0.0158208		1.21004	0.11684	0.00827914		1.20859	-0.060418	0.00594109
1.21079	-0.318559	0.0281369			1.21128	0.536917	0.00702655		1.21063	-0.097119	0.0159236		1.21087	0.117288	0.00828592		1.20942	-0.059805	0.00595142
1.21162	-0.318778	0.0281194			1.21212	0.537976	0.00704254		1.21146	-0.096334	0.0159816		1.2117	0.117641	0.00829126		1.21025	-0.060177	0.00594515
1.21245	-0.319725	0.0280438			1.21295	0.539372	0.00706361		1.21229	-0.097223	0.0159159		1.21253	0.117821	0.00829399		1.21108	-0.060464	0.00594031
1.21329	-0.321047	0.0279383			1.21378	0.539572	0.00706663		1.21312	-0.097093	0.0159255		1.21337	0.118558	0.00830515		1.21191	-0.062083	0.00591301
1.21412	-0.321807	0.0278776			1.21462	0.539059	0.00705889		1.21396	-0.097971	0.0158606		1.2142	0.119015	0.00831206		1.21274	-0.062669	0.00590313
1.21495	-0.321433	0.0279075			1.21545	0.538128	0.00704483		1.21479	-0.098397	0.0158291		1.21503	0.11917	0.00831441		1.21357	-0.062252	0.00591016
1.21578	-0.320954	0.0279457			1.21628	0.538624	0.00705232		1.21562	-0.098414	0.0158279		1.21586	0.119796	0.00832389		1.2144	-0.062129	0.00591224
1.21662	-0.321003	0.0279418			1.21711	0.538384	0.0070487		1.21645	-0.100003	0.0157104		1.2167	0.120145	0.00832917		1.21524	-0.061363	0.00592515
1.21745	-0.321673	0.0278883			1.21795	0.537361	0.00703325		1.21728	-0.099544	0.0157443		1.21753	0.121201	0.00834516		1.21607	-0.061802	0.00591775
1.21828	-0.32264	0.0278111			1.21878	0.538482	0.00705018		1.21812	-0.099602	0.01574		1.21836	0.122589	0.00836617		1.2169	-0.061065	0.00593018
1.21911	-0.322547	0.0278185			1.21961	0.537837	0.00704044		1.21895	-0.099386	0.015756		1.21919	0.122843	0.00837002		1.21773	-0.059103	0.00596326
1.21994	-0.32133	0.0279157			1.22044	0.537317	0.00703259		1.21978	-0.099596	0.0157405		1.22002	0.121632	0.00835168		1.21856	-0.059566	0.00595545
1.22078	-0.320958	0.0279454			1.22128	0.535177	0.00700027		1.22061	-0.098711	0.0158059		1.22086	0.120496	0.00833448		1.21939	-0.058675	0.00597048
1.22161	-0.320483	0.0279833			1.22211	0.533747	0.00697868		1.22144	-0.099517	0.0157463		1.22169	0.121094	0.00834354		1.22022	-0.058051	0.005981
1.22244	-0.319565	0.0280566			1.22294	0.534128	0.00698443		1.22228	-0.100206	0.0156954		1.22252	0.121475	0.00834931		1.22106	-0.05743	0.00599147
1.22327	-0.319126	0.0280916			1.22377	0.533524	0.00697531		1.22311	-0.100353	0.0156845		1.22335	0.121363	0.00834761		1.22189	-0.057801	0.00598521
1.2241	-0.318937	0.0281067			1.2246	0.532477	0.00695951		1.22394	-0.099667	0.0157352		1.22419	0.121818	0.0083545		1.22272	-0.058253	0.00597759
1.22494	-0.318574	0.0281357			1.22544	0.531777	0.00694894		1.22477	-0.098966	0.015787		1.22502	0.123162	0.00837484		1.22355	-0.058714	0.00596982
1.22577	-0.31719	0.0282462			1.22627	0.53107	0.00693826		1.2256	-0.099079	0.0157787		1.22585	0.124129	0.00838948		1.22438	-0.058601	0.00597173
1.2266	-0.317029	0.028259			1.2271	0.533037	0.00696796		1.22644	-0.098109	0.0158504		1.22668	0.124159	0.00838994		1.22521	-0.058823	0.00596798
1.22743	-0.317476	0.0282234			1.22793	0.532501	0.00695987		1.22727	-0.098617	0.0158128		1.22751	0.124291	0.00839194		1.22604	-0.059649	0.00595405
1.22826	-0.317855	0.0281931			1.22877	0.532741	0.00696349		1.2281	-0.098358	0.015832		1.22835	0.124964	0.00840212		1.22687	-0.061224	0.0059275
1.2291	-0.318013	0.0281805			1.2296	0.532492	0.00695973		1.22893	-0.098691	0.0158074		1.22918	0.125986	0.0084176		1.22771	-0.062041	0.00591372
1.22993	-0.318109	0.0281728			1.23043	0.532291	0.0069567		1.22976	-0.099308	0.0157617		1.23001	0.126556	0.00842622		1.22854	-0.06258	0.00590463
1.23076	-0.319101	0.0280936			1.23127	0.531853	0.00695008		1.2306	-0.099236	0.0157671		1.23084	0.127228	0.0084364		1.22937	-0.063026	0.00589711
1.23159	-0.320193	0.0280065			1.2321	0.530667	0.00693218		1.23143	-0.10007	0.0157054		1.23168	0.127762	0.00844448		1.2302	-0.063631	0.00588691
1.23243	-0.32064	0.0279708			1.23293	0.528206	0.00689502		1.23226	-0.101406	0.0156066		1.23251	0.128777	0.00845985		1.23103	-0.06331	0.00589232
1.23326	-0.319995	0.0280223			1.23376	0.527264	0.00688079		1.23309	-0.101305	0.0156141		1.23334	0.129473	0.00847038		1.23186	-0.06376	0.00588474
1.23409	-0.319317	0.0280764			1.2346	0.528291	0.0068963		1.23392	-0.100943	0.0156409		1.23417	0.129133	0.00846524		1.23269	-0.063345	0.00589173
1.23492	-0.319413	0.0280687			1.23543	0.527402	0.00688288		1.23476	-0.100149	0.0156996		1.235	0.128854	0.00846101		1.23352	-0.062961	0.00589821
1.23575	-0.320494	0.0279824			1.23626	0.52879	0.00690384		1.23559	-0.100655	0.0156622		1.23584	0.1289	0.00846171		1.23435	-0.064181	0.00587764
1.23659	-0.32164	0.027891			1.23709	0.527696	0.00688732		1.23642	-0.10188	0.0155716		1.23667	0.128683	0.00845842		1.23519	-0.063758	0.00588477
1.23742	-0.321899	0.0278703			1.23792	0.526684	0.00687204		1.23725	-0.10186	0.0155731		1.2375	0.128646	0.00845786		1.23602	-0.063762	0.0058847
1.23825	-0.321988	0.0278632			1.23876	0.525766	0.00685818		1.23809	-0.102339	0.0155376		1.23833	0.128088	0.00844942		1.23685	-0.063235	0.00589359
1.23908	-0.321902	0.02787			1.23959	0.525367	0.00685215		1.23892	-0.102007	0.0155622		1.23917	0.127888	0.00844639		1.23768	-0.063789	0.00588425
1.23992	-0.322396	0.0278306			1.24042	0.525834	0.0068592		1.23975	-0.101927	0.0155681		1.24	0.128311	0.00845279		1.23851	-0.064953	0.00586462
1.24075	-0.323296	0.0277588			1.24125	0.526018	0.00686198		1.24058	-0.102393	0.0155336		1.24083	0.13025	0.00848215		1.23934	-0.064297	0.00587568
1.24158	-0.323808	0.0277179			1.24209	0.528113	0.00689361		1.24141	-0.102074	0.0155572		1.24166	0.132528	0.00851663		1.24017	-0.06526	0.00585944
1.24241	-0.32451	0.0276618			1.24292	0.529897	0.00692055		1.24225	-0.100908	0.0156434		1.24249	0.132993	0.00852367		1.241	-0.064824	0.0058668
1.24324	-0.325014	0.0276216			1.24375	0.529262	0.00691096		1.24308	-0.100614	0.0156652		1.24333	0.133599	0.00853285		1.24184	-0.064551	0.0058714
1.24408	-0.325602	0.0275747			1.24459	0.52993	0.00692105		1.24391	-0.10153	0.0155975		1.24416	0.134315	0.00854368		1.24267	-0.06324	0.00589351
1.24491	-0.325097	0.027615			1.24542	0.531294	0.00694164		1.24474	-0.100613	0.0156653		1.24499	0.135433	0.00856061		1.2435	-0.062453	0.00590678
1.24574	-0.324475	0.0276646			1.24625	0.532734	0.00696339		1.24557	-0.100552	0.0156698		1.24582	0.136592	0.00857815		1.24433	-0.062813	0.0059007
1.24657	-0.324806	0.0276382			1.24708	0.532128	0.00695424		1.2464	-0.100568	0.0156686		1.24666	0.137081	0.00858556		1.24516	-0.06359	0.0058876
1.24741	-0.324907	0.0276302			1.24792	0.531831	0.00694975		1.24724	-0.10203	0.0155605		1.24749	0.137088	0.00858566		1.24599	-0.063487	0.00588934
1.24824	-0.324732	0.0276441			1.24875	0.531469	0.00694429		1.24807	-0.102059	0.0155583		1.24832	0.137005	0.00858441		1.24682	-0.063135	0.00589528
1.24907	-0.324587	0.0276557			1.24958	0.531573	0.00694586		1.2489	-0.102379	0.0155347		1.24915	0.136645	0.00857896		1.24765	-0.063318	0.00589219
1.2499	-0.324667	0.0276493			1.25041	0.530109	0.00692375		1.24973	-0.100976	0.0156384		1.24998	0.136845	0.00858198		1.24849	-0.062815	0.00590067
1.25073	-0.324438	0.0276676			1.25124	0.52888	0.00690519		1.25057	-0.099844	0.0157221		1.25082	0.13736	0.00858978		1.24932	-0.062035	0.00591382
1.25157	-0.323528	0.0277402			1.25208	0.528301	0.00689645		1.2514	-0.101061	0.0156321		1.25165	0.136624	0.00857864		1.25015	-0.062116	0.00591246
1.2524	-0.322857	0.0277938			1.25291	0.528196	0.00689487		1.25223	-0.101843	0.0155743		1.25248	0.136312	0.00857392		1.25098	-0.061491	0.005923
1.25323	-0.322643	0.0278109			1.25374	0.529812	0.00691927		1.25306	-0.101131	0.015627		1.25331	0.136902	0.00858285		1.25181	-0.060805	0.00593456
1.25406	-0.322953	0.0277861			1.25457	0.530174	0.00692473		1.25389	-0.100141	0.0157002		1.25415	0.13716	0.00858675		1.25264	-0.060282	0.00594338
1.25489	-0.32357	0.0277369			1.25541	0.529056	0.00690785		1.25473	-0.099934	0.0157155		1.25498	0.137779	0.00859612		1.25347	-0.059154	0.0059624
1.25573	-0.324013	0.0277015			1.25624	0.529327	0.00691194		1.25556	-0.1002	0.0156958		1.25581	0.138949	0.00861384		1.2543	-0.05876	0.00596904
1.25656	-0.323745	0.0277229			1.25707	0.527783	0.00688863		1.25639	-0.098805	0.0157989		1.25664	0.140415	0.00863603		1.25513	-0.058181	0.00597881
1.25739	-0.323313	0.0277574			1.25791	0.527876	0.00689003		1.25722	-0.097741	0.0158776		1.25747	0.141184	0.00864767		1.25597	-0.05763	0.0059881
1.25822	-0.323434	0.0277477			1.25874	0.528867	0.006905		1.25805	-0.097482	0.0158968		1.25831	0.141866	0.008658		1.2568	-0.057782	0.00598554
1.25906	-0.324099	0.0276947			1.25957	0.530174	0.00692473		1.25889	-0.097041	0.0159294		1.25914	0.142869	0.00867318		1.25763	-0.056944	0.00599966
1.25989	-0.324853	0.0276345			1.2604	0.531265	0.00694121		1.25972	-0.09639	0.0159775		1.25997	0.142364	0.00866553		1.25846	-0.056194	0.00601231
1.26072	-0.324356	0.0276741			1.26124	0.532136	0.00695436		1.26055	-0.095985	0.0160075		1.2608	0.14148	0.00865215		1.25929	-0.056244	0.00601147
1.26155	-0.323718	0.0277251			1.26207	0.531402	0.00694327		1.26138	-0.095836	0.0160185		1.26164	0.141465	0.00865192		1.26012	-0.056364	0.00600944
1.26238	-0.323415	0.0277493			1.2629	0.529655	0.0069169		1.26221	-0.096412	0.0159759		1.26247	0.140578	0.0086385		1.26095	-0.056411	0.00600865
1.26322	-0.323342	0.0277551			1.26373	0.528725	0.00690285		1.26305	-0.097718	0.0158793		1.2633	0.140933	0.00864387		1.26178	-0.056749	0.00600295
1.26405	-0.324352	0.0276745			1.26456	0.52944	0.00691365		1.26388	-0.097523	0.0158937		1.26413	0.141264	0.00864888		1.26262	-0.057569	0.00598913
1.26488	-0.324954	0.0276264			1.2654	0.528454	0.00689876		1.26471	-0.096491	0.01597		1.26496	0.14166	0.00865488		1.26345	-0.058504	0.00597336
1.26571	-0.325498	0.027583			1.26623	0.52759	0.00688572		1.26554	-0.096708	0.015954		1.2658	0.142514	0.00866781		1.26428	-0.058806	0.00596827
1.26655	-0.326227	0.0275248			1.26706	0.52574	0.00685778		1.26638	-0.095326	0.0160562		1.26663	0.14252	0.0086679		1.26511	-0.057707	0.0059868
1.26738	-0.326209	0.0275262			1.26789	0.526604	0.00687083		1.26721	-0.094646	0.0161065		1.26746	0.142963	0.0086746		1.26594	-0.055708	0.00602051
1.26821	-0.326146	0.0275313			1.26873	0.525394	0.00685256		1.26804	-0.092672	0.0162524		1.26829	0.14416	0.00869272		1.26677	-0.054519	0.00604055
1.26904	-0.326908	0.0274704			1.26956	0.525775	0.00685831		1.26887	-0.093225	0.0162115		1.26913	0.145062	0.00870638		1.2676	-0.054203	0.00604588
1.26987	-0.327376	0.0274331			1.27039	0.524626	0.00684096		1.2697	-0.091886	0.0163105		1.26996	0.146758	0.00873205		1.26843	-0.053658	0.00605507
1.2707	-0.327414	0.02743			1.27123	0.526205	0.0068648		1.27053	-0.091542	0.016336		1.27079	0.147851	0.0087486		1.26927	-0.053675	0.00605479
1.27154	-0.327273	0.0274413			1.27206	0.526185	0.0068645		1.27137	-0.093124	0.016219		1.27162	0.148234	0.0087544		1.2701	-0.053571	0.00605654
1.27237	-0.327685	0.0274084			1.27289	0.526893	0.00687519		1.2722	-0.092898	0.0162357		1.27245	0.148199	0.00875387		1.27093	-0.052851	0.00606868
1.2732	-0.328857	0.0273148			1.27372	0.52785	0.00688964		1.27303	-0.091863	0.0163122		1.27329	0.149738	0.00877717		1.27176	-0.053082	0.00606478
1.27403	-0.329393	0.0272721			1.27456	0.527529	0.0068848		1.27386	-0.0913	0.0163539		1.27412	0.149788	0.00877792		1.27259	-0.053159	0.00606349
1.27487	-0.32945	0.0272675			1.27539	0.527316	0.00688158		1.27469	-0.092542	0.016262		1.27495	0.150995	0.00879619		1.27342	-0.052835	0.00606895
1.2757	-0.328988	0.0273044			1.27622	0.52498	0.00684631		1.27553	-0.093556	0.016187		1.27578	0.152457	0.00881833		1.27425	-0.052701	0.00607121
1.27653	-0.328845	0.0273158			1.27705	0.524739	0.00684267		1.27636	-0.093014	0.0162271		1.27662	0.152807	0.00882363		1.27508	-0.052155	0.00608041
1.27736	-0.329589	0.0272564			1.27788	0.524863	0.00684454		1.27719	-0.09385	0.0161653		1.27745	0.152484	0.00881874		1.27591	-0.051589	0.00608996
1.27819	-0.329957	0.027227			1.27872	0.525025	0.00684699		1.27802	-0.094274	0.016134		1.27828	0.15266	0.0088214		1.27675	-0.051597	0.00608982
1.27903	-0.330363	0.0271946			1.27955	0.523348	0.00682167		1.27886	-0.094182	0.0161408		1.27911	0.153346	0.00883179		1.27758	-0.051378	0.00609352
1.27986	-0.330436	0.0271888			1.28038	0.522818	0.00681366		1.27969	-0.094085	0.0161479		1.27994	0.153747	0.00883786		1.27841	-0.051509	0.00609131
1.28069	-0.329556	0.027259			1.28121	0.521041	0.00678683		1.28052	-0.09542	0.0160492		1.28078	0.155238	0.00886043		1.27924	-0.051241	0.00609583
1.28152	-0.329195	0.0272879			1.28205	0.51969	0.00676643		1.28135	-0.095644	0.0160327		1.28161	0.1565	0.00887953		1.28007	-0.050554	0.00610741
1.28236	-0.329445	0.0272679			1.28288	0.519876	0.00676924		1.28218	-0.094882	0.016089		1.28244	0.156866	0.00888507		1.2809	-0.050781	0.00610358
1.28319	-0.330415	0.0271905			1.28371	0.520302	0.00677567		1.28302	-0.094672	0.0161045		1.28327	0.157624	0.00889655		1.28173	-0.051155	0.00609728
1.28402	-0.330486	0.0271848			1.28455	0.519715	0.00676681		1.28385	-0.093696	0.0161767		1.28411	0.157852	0.0089		1.28256	-0.051273	0.00609529
1.28485	-0.330181	0.0272092			1.28538	0.51748	0.00673306		1.28468	-0.093753	0.0161725		1.28494	0.158907	0.00891597		1.2834	-0.050533	0.00610776
1.28568	-0.330334	0.0271969			1.28621	0.516649	0.00672052		1.28551	-0.094392	0.0161252		1.28577	0.160168	0.00893506		1.28423	-0.050428	0.00610953
1.28652	-0.330424	0.0271898			1.28704	0.515826	0.00670809		1.28634	-0.094977	0.016082		1.2866	0.159975	0.00893214		1.28506	-0.051247	0.00609572
1.28735	-0.330607	0.0271751			1.28788	0.516719	0.00672157		1.28718	-0.096857	0.015943		1.28743	0.159657	0.00892732		1.28589	-0.052565	0.0060735
1.28818	-0.331256	0.0271233			1.28871	0.516775	0.00672242		1.28801	-0.096985	0.0159335		1.28827	0.1593	0.00892192		1.28672	-0.054263	0.00604487
1.28901	-0.331417	0.0271105			1.28954	0.517556	0.00673421		1.28884	-0.098063	0.0158538		1.2891	0.15954	0.00892555		1.28755	-0.055399	0.00602572
1.28984	-0.33146	0.0271071			1.29037	0.516772	0.00672237		1.28967	-0.09757	0.0158903		1.28993	0.159691	0.00892784		1.28838	-0.056091	0.00601405
1.29068	-0.331387	0.0271129			1.2912	0.516552	0.00671905		1.2905	-0.099427	0.015753		1.29076	0.159963	0.00893196		1.28921	-0.05668	0.00600412
1.29151	-0.331837	0.027077			1.29204	0.515917	0.00670946		1.29134	-0.099079	0.0157787		1.2916	0.160581	0.00894131		1.29005	-0.057129	0.00599655
1.29234	-0.332516	0.0270228			1.29287	0.515295	0.00670007		1.29217	-0.099448	0.0157514		1.29243	0.162047	0.00896351		1.29088	-0.057376	0.00599238
1.29317	-0.332873	0.0269943			1.2937	0.513731	0.00667646		1.293	-0.099458	0.0157507		1.29326	0.164357	0.00899848		1.29171	-0.058405	0.00597503
1.29401	-0.332897	0.0269923			1.29453	0.5127	0.00666089		1.29383	-0.100516	0.0156724		1.29409	0.166045	0.00902403		1.29254	-0.060156	0.00594551
1.29484	-0.33259	0.0270169			1.29537	0.511197	0.0066382		1.29466	-0.100471	0.0156758		1.29492	0.166126	0.00902526		1.29337	-0.061433	0.00592397
1.29567	-0.332942	0.0269888			1.2962	0.511024	0.00663558		1.2955	-0.098763	0.015802		1.29576	0.1655	0.00901578		1.2942	-0.062394	0.00590777
1.2965	-0.333956	0.0269078			1.29703	0.512156	0.00665268		1.29633	-0.098248	0.0158401		1.29659	0.165605	0.00901737		1.29503	-0.063578	0.00588781
1.29733	-0.334021	0.0269026			1.29787	0.512197	0.0066533		1.29716	-0.097555	0.0158914		1.29742	0.166779	0.00903514		1.29586	-0.064902	0.00586548
1.29817	-0.333695	0.0269286			1.2987	0.512895	0.00666384		1.29799	-0.097776	0.015875		1.29825	0.168022	0.00905396		1.2967	-0.06557	0.00585422
1.299	-0.333214	0.026967			1.29953	0.512656	0.00666023		1.29882	-0.097537	0.0158927		1.29908	0.168354	0.00905898		1.29753	-0.066388	0.00584043
1.29983	-0.33248	0.0270256			1.30036	0.512348	0.00665558		1.29966	-0.096557	0.0159652		1.29992	0.168899	0.00906724		1.29836	-0.067679	0.00581866
1.30066	-0.331967	0.0270666			1.3012	0.512078	0.0066515		1.30049	-0.097484	0.0158966		1.30075	0.169661	0.00907877		1.29919	-0.068629	0.00580264
1.3015	-0.331628	0.0270936			1.30203	0.51193	0.00664926		1.30132	-0.096625	0.0159601		1.30158	0.170262	0.00908787		1.30002	-0.069509	0.0057878
1.30233	-0.331802	0.0270798			1.30286	0.511772	0.00664688		1.30215	-0.096456	0.0159726		1.30241	0.171202	0.0091021		1.30085	-0.07051	0.00577092
1.30316	-0.331044	0.0271403			1.30369	0.510971	0.00663478		1.30299	-0.096879	0.0159413		1.30325	0.172309	0.00911886		1.30168	-0.070159	0.00577684
1.30399	-0.329905	0.0272312			1.30452	0.509702	0.00661562		1.30382	-0.095994	0.0160068		1.30408	0.172925	0.00912818		1.30251	-0.069974	0.00577996
1.30482	-0.330942	0.0271484			1.30536	0.509432	0.00661155		1.30465	-0.096365	0.0159794		1.30491	0.173793	0.00914132		1.30334	-0.069468	0.00578849
1.30566	-0.331592	0.0270965			1.30619	0.510713	0.00663089		1.30548	-0.095896	0.016014		1.30574	0.174355	0.00914983		1.30418	-0.06902	0.00579605
1.30649	-0.331328	0.0271176			1.30702	0.511417	0.00664152		1.30631	-0.095481	0.0160447		1.30657	0.175104	0.00916117		1.30501	-0.069407	0.00578952
1.30732	-0.331184	0.0271291			1.30785	0.512751	0.00666166		1.30715	-0.095007	0.0160798		1.30741	0.176639	0.00918441		1.30584	-0.068911	0.00579788
1.30815	-0.330652	0.0271716			1.30869	0.512865	0.00666338		1.30798	-0.094016	0.016153		1.30824	0.177745	0.00920115		1.30667	-0.068792	0.00579989
1.30899	-0.330488	0.0271846			1.30952	0.513461	0.00667238		1.30881	-0.094771	0.0160972		1.30907	0.178798	0.00921709		1.3075	-0.068534	0.00580424
1.30982	-0.330452	0.0271875			1.31035	0.513367	0.00667096		1.30964	-0.094767	0.0160975		1.3099	0.179822	0.00923259		1.30833	-0.068307	0.00580807
1.31065	-0.330684	0.027169			1.31119	0.513795	0.00667742		1.31047	-0.095611	0.0160351		1.31073	0.179957	0.00923464		1.30916	-0.067692	0.00581844
1.31148	-0.331741	0.0270846			1.31202	0.513182	0.00666817		1.3113	-0.09461	0.0161091		1.31157	0.179834	0.00923277		1.31	-0.067525	0.00582125
1.31231	-0.332108	0.0270553			1.31285	0.513085	0.0066667		1.31214	-0.09467	0.0161047		1.3124	0.179787	0.00923206		1.31083	-0.06777	0.00581712
1.31315	-0.33232	0.0270384			1.31368	0.513736	0.00667653		1.31297	-0.094036	0.0161516		1.31323	0.179288	0.00922451		1.31166	-0.067825	0.0058162
1.31398	-0.332916	0.0269908			1.31452	0.514703	0.00669113		1.3138	-0.093058	0.0162239		1.31406	0.178793	0.00921702		1.31249	-0.067795	0.0058167
1.31481	-0.333646	0.0269326			1.31535	0.515044	0.00669628		1.31463	-0.09258	0.0162592		1.3149	0.179043	0.0092208		1.31332	-0.066257	0.00584263
1.31564	-0.334055	0.0268999			1.31618	0.516163	0.00671318		1.31547	-0.092902	0.0162354		1.31573	0.180841	0.00924802		1.31415	-0.065689	0.00585221
1.31647	-0.33332	0.0269586			1.31701	0.516737	0.00672185		1.3163	-0.092991	0.0162288		1.31656	0.181256	0.0092543		1.31498	-0.065294	0.00585887
1.31731	-0.332814	0.026999			1.31784	0.516856	0.00672364		1.31713	-0.094391	0.0161253		1.31739	0.181206	0.00925354		1.31581	-0.064784	0.00586747
1.31814	-0.333029	0.0269818			1.31868	0.516652	0.00672056		1.31796	-0.095857	0.0160169		1.31822	0.181435	0.00925701		1.31665	-0.064207	0.0058772
1.31897	-0.332793	0.0270006			1.31951	0.51551	0.00670332		1.31879	-0.095691	0.0160292		1.31906	0.181275	0.00925459		1.31748	-0.063925	0.00588196
1.3198	-0.332763	0.027003			1.32034	0.515251	0.00669941		1.31963	-0.095609	0.0160353		1.31989	0.181078	0.00925161		1.31831	-0.064403	0.0058739
1.32064	-0.333411	0.0269513			1.32117	0.515982	0.00671045		1.32046	-0.096491	0.01597		1.32072	0.181979	0.00926525		1.31914	-0.063545	0.00588836
1.32147	-0.333695	0.0269286			1.32201	0.515641	0.0067053		1.32129	-0.095904	0.0160134		1.32155	0.181771	0.0092621		1.31997	-0.063493	0.00588924
1.3223	-0.334591	0.0268571			1.32284	0.51618	0.00671344		1.32212	-0.097037	0.0159297		1.32239	0.181995	0.00926549		1.3208	-0.063946	0.0058816
1.32313	-0.335628	0.0267743			1.32367	0.516937	0.00672487		1.32295	-0.097261	0.0159131		1.32322	0.182398	0.00927159		1.32163	-0.064822	0.00586683
1.32396	-0.336653	0.0266925			1.32451	0.518302	0.00674548		1.32379	-0.096442	0.0159737		1.32405	0.182955	0.00928002		1.32246	-0.06606	0.00584596
1.3248	-0.337514	0.0266238			1.32534	0.518201	0.00674395		1.32462	-0.097177	0.0159193		1.32488	0.184139	0.00929795		1.3233	-0.066605	0.00583677
1.32563	-0.337039	0.0266617			1.32617	0.517878	0.00673907		1.32545	-0.09688	0.0159413		1.32571	0.185037	0.00931154		1.32413	-0.066747	0.00583437
1.32646	-0.336958	0.0266682			1.327	0.517688	0.00673621		1.32628	-0.098578	0.0158157		1.32655	0.185124	0.00931286		1.32496	-0.066921	0.00583144
1.32729	-0.337448	0.0266291			1.32784	0.517472	0.00673294		1.32711	-0.098275	0.0158381		1.32738	0.184636	0.00930547		1.32579	-0.067479	0.00582203
1.32812	-0.339261	0.0264843			1.32867	0.515874	0.00670882		1.32795	-0.09887	0.0157941		1.32821	0.183235	0.00928426		1.32662	-0.068133	0.005811
1.32896	-0.341755	0.0262852			1.3295	0.514945	0.00669479		1.32878	-0.099399	0.015755		1.32904	0.182228	0.00926902		1.32745	-0.067941	0.00581424
1.32979	-0.343029	0.0261835			1.33033	0.513472	0.00667255		1.32961	-0.099453	0.015751		1.32988	0.182314	0.00927032		1.32828	-0.067381	0.00582368
1.33062	-0.342955	0.0261894			1.33116	0.513621	0.0066748		1.33044	-0.099798	0.0157255		1.33071	0.18288	0.00927889		1.32911	-0.067198	0.00582677
1.33145	-0.342815	0.0262006			1.332	0.514307	0.00668516		1.33127	-0.100421	0.0156795		1.33154	0.184441	0.00930252		1.32994	-0.068391	0.00580665
1.33228	-0.342959	0.0261891			1.33283	0.516728	0.00672171		1.33211	-0.100579	0.0156678		1.33237	0.184945	0.00931015		1.33078	-0.068881	0.00579839
1.33312	-0.343613	0.0261369			1.33366	0.516789	0.00672263		1.33294	-0.101212	0.015621		1.3332	0.185962	0.00932554		1.33161	-0.068898	0.0057981
1.33395	-0.344863	0.0260371			1.33449	0.517271	0.00672991		1.33377	-0.100769	0.0156537		1.33404	0.187221	0.0093446		1.33244	-0.068734	0.00580087
1.33478	-0.34486	0.0260374			1.33533	0.517893	0.0067393		1.3346	-0.101673	0.0155869		1.33487	0.188862	0.00936945		1.33327	-0.069008	0.00579625
1.33561	-0.344793	0.0260427			1.33616	0.518876	0.00675414		1.33543	-0.101609	0.0155916		1.3357	0.189199	0.00937455		1.3341	-0.069647	0.00578547
1.33645	-0.344245	0.0260865			1.33699	0.518344	0.00674611		1.33627	-0.101396	0.0156074		1.33653	0.189166	0.00937405		1.33493	-0.070021	0.00577917
1.33728	-0.344239	0.0260869			1.33783	0.518906	0.0067546		1.3371	-0.102289	0.0155413		1.33737	0.190576	0.00939539		1.33576	-0.070644	0.00576866
1.33811	-0.345014	0.0260251			1.33866	0.518773	0.00675259		1.33793	-0.102357	0.0155363		1.3382	0.191132	0.00940381		1.33659	-0.070799	0.00576605
1.33894	-0.346197	0.0259306			1.33949	0.518244	0.0067446		1.33876	-0.100547	0.0156701		1.33903	0.190724	0.00939763		1.33743	-0.070337	0.00577384
1.33977	-0.34585	0.0259583			1.34032	0.518036	0.00674146		1.3396	-0.100564	0.0156689		1.33986	0.191118	0.0094036		1.33826	-0.069707	0.00578446
1.34061	-0.346022	0.0259446			1.34116	0.518355	0.00674628		1.34043	-0.102087	0.0155563		1.34069	0.192744	0.00942821		1.33909	-0.069947	0.00578042
1.34144	-0.345969	0.0259488			1.34199	0.518178	0.0067436		1.34126	-0.10172	0.0155834		1.34153	0.192902	0.00943061		1.33992	-0.070591	0.00576956
1.34227	-0.346647	0.0258947			1.34282	0.517655	0.00673571		1.34209	-0.101692	0.0155855		1.34236	0.193684	0.00944244		1.34075	-0.071249	0.00575846
1.3431	-0.347309	0.0258419			1.34365	0.516755	0.00672212		1.34292	-0.099844	0.0157221		1.34319	0.193522	0.00943999		1.34158	-0.071161	0.00575995
1.34394	-0.3468	0.0258825			1.34448	0.514965	0.00669509		1.34376	-0.10034	0.0156854		1.34402	0.192577	0.00942569		1.34241	-0.070674	0.00576816
1.34477	-0.347231	0.0258481			1.34532	0.515103	0.00669717		1.34459	-0.102115	0.0155542		1.34486	0.192297	0.00942145		1.34324	-0.070347	0.00577367
1.3456	-0.348811	0.025722			1.34615	0.515372	0.00670124		1.34542	-0.102948	0.0154926		1.34569	0.192738	0.00942812		1.34407	-0.070856	0.00576509
1.34643	-0.349302	0.0256828			1.34698	0.515022	0.00669595		1.34625	-0.103415	0.0154581		1.34652	0.19261	0.00942618		1.34491	-0.071616	0.00575227
1.34726	-0.34917	0.0256933			1.34781	0.515428	0.00670208		1.34708	-0.103755	0.0154329		1.34735	0.192566	0.00942552		1.34574	-0.07233	0.00574023
1.3481	-0.34931	0.0256821			1.34865	0.515924	0.00670957		1.34791	-0.104578	0.0153721		1.34818	0.193306	0.00943672		1.34657	-0.072205	0.00574234
1.34893	-0.348319	0.0257613			1.34948	0.515556	0.00670401		1.34875	-0.105591	0.0152972		1.34902	0.194332	0.00945225		1.3474	-0.071922	0.00574711
1.34976	-0.346682	0.0258919			1.35031	0.51546	0.00670256		1.34958	-0.106859	0.0152034		1.34985	0.195263	0.00946635		1.34823	-0.072905	0.00573054
1.35059	-0.345577	0.0259801			1.35115	0.515551	0.00670394		1.35041	-0.107059	0.0151886		1.35068	0.19524	0.009466		1.34906	-0.074847	0.00569779
1.35143	-0.346053	0.0259421			1.35198	0.51543	0.00670211		1.35124	-0.107453	0.0151595		1.35151	0.194734	0.00945834		1.34989	-0.075472	0.00568726
1.35226	-0.346203	0.0259302			1.35281	0.514471	0.00668763		1.35207	-0.107697	0.0151415		1.35235	0.194579	0.00945599		1.35072	-0.074571	0.00570245
1.35309	-0.345058	0.0260216			1.35364	0.5137	0.00667599		1.35291	-0.109073	0.0150397		1.35318	0.195043	0.00946302		1.35156	-0.073739	0.00571648
1.35392	-0.343755	0.0261256			1.35448	0.514581	0.00668929		1.35374	-0.110218	0.0149551		1.35401	0.194971	0.00946193		1.35239	-0.073421	0.00572184
1.35475	-0.342179	0.0262514			1.35531	0.515673	0.00670578		1.35457	-0.110035	0.0149686		1.35484	0.193756	0.00944353		1.35322	-0.074011	0.00571189
1.35559	-0.341686	0.0262907			1.35614	0.515094	0.00669704		1.3554	-0.111134	0.0148873		1.35567	0.192529	0.00942496		1.35405	-0.07454	0.00570297
1.35642	-0.341513	0.0263046			1.35697	0.513747	0.0066767		1.35624	-0.111073	0.0148919		1.35651	0.19244	0.00942361		1.35488	-0.074423	0.00570494
1.35725	-0.342227	0.0262476			1.3578	0.513444	0.00667212		1.35707	-0.110438	0.0149388		1.35734	0.191674	0.00941201		1.35571	-0.075213	0.00569162
1.35808	-0.343253	0.0261657			1.35864	0.511758	0.00664667		1.3579	-0.111193	0.014883		1.35817	0.190659	0.00939665		1.35654	-0.074613	0.00570174
1.35891	-0.342722	0.026208			1.35947	0.511066	0.00663622		1.35873	-0.11161	0.0148521		1.359	0.190801	0.0093988		1.35737	-0.075299	0.00569017
1.35975	-0.342028	0.0262634			1.3603	0.511727	0.0066462		1.35956	-0.113543	0.0147092		1.35984	0.191243	0.00940549		1.35821	-0.076275	0.00567372
1.36058	-0.342496	0.0262261			1.36113	0.512469	0.0066574		1.3604	-0.113872	0.0146849		1.36067	0.19094	0.0094009		1.35904	-0.077697	0.00564974
1.36141	-0.34289	0.0261946			1.36197	0.512663	0.00666033		1.36123	-0.112985	0.0147505		1.3615	0.190737	0.00939783		1.35987	-0.076666	0.00566712
1.36224	-0.343508	0.0261453			1.3628	0.513258	0.00666932		1.36206	-0.114524	0.0146367		1.36233	0.190585	0.00939553		1.3607	-0.076126	0.00567623
1.36308	-0.343199	0.02617			1.36363	0.514176	0.00668318		1.36289	-0.114245	0.0146573		1.36316	0.19061	0.00939591		1.36153	-0.075703	0.00568336
1.36391	-0.342575	0.0262198			1.36447	0.514766	0.00669209		1.36372	-0.115455	0.0145678		1.364	0.191092	0.0094032		1.36236	-0.075833	0.00568117
1.36474	-0.343023	0.026184			1.3653	0.51546	0.00670256		1.36456	-0.11553	0.0145623		1.36483	0.191758	0.00941329		1.36319	-0.076362	0.00567225
1.36557	-0.343225	0.0261679			1.36613	0.514495	0.00668799		1.36539	-0.115451	0.0145681		1.36566	0.192005	0.00941703		1.36402	-0.076686	0.00566679
1.3664	-0.343029	0.0261835			1.36696	0.515004	0.00669568		1.36622	-0.114484	0.0146396		1.36649	0.192097	0.00941842		1.36485	-0.075578	0.00568547
1.36724	-0.343312	0.0261609			1.3678	0.516008	0.00671084		1.36705	-0.11557	0.0145593		1.36733	0.192454	0.00942382		1.36569	-0.075921	0.00567968
1.36807	-0.342672	0.026212			1.36863	0.515878	0.00670888		1.36788	-0.114236	0.014658		1.36816	0.192691	0.00942741		1.36652	-0.075722	0.00568304
1.3689	-0.340985	0.0263467			1.36946	0.515166	0.00669813		1.36872	-0.113585	0.0147061		1.36899	0.19195	0.00941619		1.36735	-0.075359	0.00568916
1.36973	-0.340676	0.0263714			1.37029	0.515553	0.00670397		1.36955	-0.112339	0.0147982		1.36982	0.192775	0.00942868		1.36818	-0.076171	0.00567547
1.37056	-0.341833	0.026279			1.37112	0.515645	0.00670536		1.37038	-0.111439	0.0148648		1.37065	0.192972	0.00943166		1.36901	-0.076154	0.00567576
1.3714	-0.343197	0.0261701			1.37196	0.515256	0.00669948		1.37121	-0.111096	0.0148902		1.37149	0.193601	0.00944119		1.36984	-0.073853	0.00571455
1.37223	-0.343056	0.0261814			1.37279	0.51407	0.00668158		1.37204	-0.110744	0.0149162		1.37232	0.193541	0.00944028		1.37067	-0.073001	0.00572892
1.37306	-0.342175	0.0262517			1.37362	0.514473	0.00668766		1.37288	-0.110924	0.0149029		1.37315	0.193579	0.00944085		1.3715	-0.072804	0.00573224
1.37389	-0.341487	0.0263066			1.37445	0.513706	0.00667608		1.37371	-0.109882	0.0149799		1.37398	0.193296	0.00943657		1.37234	-0.073547	0.00571971
1.37472	-0.342414	0.0262326			1.37529	0.512081	0.00665154		1.37454	-0.10905	0.0150414		1.37482	0.19308	0.0094333		1.37317	-0.074077	0.00571078
1.37556	-0.342111	0.0262568			1.37612	0.509594	0.00661399		1.37537	-0.109851	0.0149822		1.37565	0.193992	0.00944711		1.374	-0.074049	0.00571125
1.37639	-0.341901	0.0262736			1.37695	0.50923	0.0066085		1.3762	-0.109288	0.0150238		1.37648	0.194284	0.00945153		1.37483	-0.074241	0.00570801
1.37722	-0.341169	0.026332			1.37779	0.509124	0.0066069		1.37704	-0.109132	0.0150354		1.37731	0.193149	0.00943434		1.37566	-0.074869	0.00569742
1.37805	-0.341637	0.0262947			1.37862	0.508598	0.00659895		1.37787	-0.110538	0.0149314		1.37814	0.193618	0.00944144		1.37649	-0.074393	0.00570545
1.37889	-0.341609	0.0262969			1.37945	0.508669	0.00660003		1.3787	-0.110661	0.0149223		1.37898	0.19392	0.00944602		1.37732	-0.074445	0.00570457
1.37972	-0.340919	0.026352			1.38028	0.509453	0.00661186		1.37953	-0.109853	0.0149821		1.37981	0.194389	0.00945312		1.37816	-0.07336	0.00572287
1.38055	-0.340588	0.0263784			1.38112	0.508917	0.00660377		1.38037	-0.108626	0.0150728		1.38064	0.194577	0.00945596		1.37899	-0.073388	0.00572239
1.38138	-0.340949	0.0263496			1.38195	0.508207	0.00659305		1.3812	-0.109057	0.0150409		1.38147	0.195575	0.00947107		1.37982	-0.073621	0.00571847
1.38221	-0.341623	0.0262958			1.38278	0.507156	0.00657718		1.38203	-0.108182	0.0151056		1.38231	0.195836	0.00947502		1.38065	-0.074051	0.00571122
1.38305	-0.341304	0.0263212			1.38361	0.505436	0.00655121		1.38286	-0.107443	0.0151603		1.38314	0.195887	0.00947579		1.38148	-0.073956	0.00571282
1.38388	-0.34071	0.0263687			1.38444	0.504732	0.00654058		1.38369	-0.108791	0.0150606		1.38397	0.195591	0.00947131		1.38231	-0.074145	0.00570963
1.38471	-0.340625	0.0263754			1.38528	0.503798	0.00652648		1.38453	-0.108816	0.0150587		1.3848	0.195622	0.00947178		1.38314	-0.073976	0.00571248
1.38554	-0.340827	0.0263593			1.38611	0.503549	0.00652272		1.38536	-0.109606	0.0150003		1.38563	0.197063	0.0094936		1.38397	-0.072619	0.00573536
1.38637	-0.340063	0.0264203			1.38694	0.502965	0.0065139		1.38619	-0.109252	0.0150265		1.38647	0.197335	0.00949771		1.3848	-0.071474	0.00575467
1.38721	-0.340188	0.0264103			1.38777	0.501535	0.00649231		1.38702	-0.111959	0.0148263		1.3873	0.197545	0.00950089		1.38564	-0.071837	0.00574855
1.38804	-0.34124	0.0263263			1.38861	0.500554	0.0064775		1.38785	-0.109543	0.015005		1.38813	0.198039	0.00950837		1.38647	-0.070869	0.00576487
1.38887	-0.341849	0.0262777			1.38944	0.499342	0.0064592		1.38868	-0.110321	0.0149475		1.38896	0.199166	0.00952543		1.3873	-0.072076	0.00574452
1.3897	-0.343974	0.0261081			1.39027	0.499532	0.00646207		1.38952	-0.110353	0.0149451		1.3898	0.201103	0.00955476		1.38813	-0.071928	0.00574701
1.39054	-0.344624	0.0260562			1.39111	0.49964	0.0064637		1.39035	-0.110633	0.0149244		1.39063	0.201334	0.00955825		1.38896	-0.071211	0.0057591
1.39137	-0.345777	0.0259642			1.39194	0.49931	0.00645871		1.39118	-0.109953	0.0149747		1.39146	0.201588	0.0095621		1.38979	-0.072197	0.00574248
1.3922	-0.344551	0.026062			1.39277	0.499139	0.00645613		1.39201	-0.110828	0.01491		1.39229	0.201663	0.00956323		1.39062	-0.073918	0.00571346
1.39303	-0.344776	0.0260441			1.3936	0.499523	0.00646193		1.39285	-0.11025	0.0149527		1.39312	0.202498	0.00957587		1.39145	-0.074332	0.00570648
1.39386	-0.346143	0.025935			1.39444	0.499128	0.00645597		1.39368	-0.109709	0.0149927		1.39396	0.201842	0.00956594		1.39228	-0.074693	0.00570039
1.3947	-0.346938	0.0258715			1.39527	0.498966	0.00645352		1.39451	-0.10886	0.0150555		1.39479	0.202748	0.00957966		1.39312	-0.075004	0.00569515
1.39553	-0.345701	0.0259702			1.3961	0.499507	0.00646169		1.39534	-0.109604	0.0150005		1.39562	0.203306	0.00958811		1.39395	-0.074167	0.00570926
1.39636	-0.34597	0.0259488			1.39693	0.500151	0.00647141		1.39617	-0.109658	0.0149965		1.39645	0.203024	0.00958384		1.39478	-0.073316	0.00572361
1.39719	-0.345777	0.0259642			1.39776	0.500728	0.00648012		1.39701	-0.108858	0.0150556		1.39729	0.204466	0.00960567		1.39561	-0.072817	0.00573202
1.39803	-0.346758	0.0258859			1.3986	0.501191	0.00648712		1.39784	-0.109349	0.0150193		1.39812	0.206479	0.00963614		1.39644	-0.072971	0.00572943
1.39886	-0.346629	0.0258962			1.39943	0.501097	0.0064857		1.39867	-0.108463	0.0150848		1.39895	0.20824	0.0096628		1.39727	-0.073019	0.00572862
1.39969	-0.346274	0.0259245			1.40026	0.501506	0.00649187		1.3995	-0.108152	0.0151078		1.39978	0.209874	0.00968754		1.3981	-0.074463	0.00570427
1.40052	-0.34704	0.0258634			1.40109	0.502225	0.00650273		1.40033	-0.108578	0.0150763		1.40061	0.21069	0.00969989		1.39894	-0.075486	0.00568702
1.40135	-0.347292	0.0258432			1.40193	0.50267	0.00650945		1.40117	-0.10875	0.0150636		1.40145	0.210229	0.00969291		1.39977	-0.074894	0.005697
1.40219	-0.346741	0.0258872			1.40276	0.5028	0.00651141		1.402	-0.107279	0.0151724		1.40228	0.210018	0.00968972		1.4006	-0.075519	0.00568646
1.40302	-0.346701	0.0258904			1.40359	0.502814	0.00651162		1.40283	-0.108882	0.0150539		1.40311	0.209749	0.00968564		1.40143	-0.076363	0.00567223
1.40385	-0.347366	0.0258373			1.40443	0.50326	0.00651836		1.40366	-0.107622	0.015147		1.40394	0.210656	0.00969937		1.40226	-0.077029	0.005661
1.40468	-0.348386	0.0257559			1.40526	0.503222	0.00651778		1.40449	-0.106267	0.0152472		1.40478	0.211716	0.00971542		1.40309	-0.077215	0.00565787
1.40552	-0.348095	0.0257791			1.40609	0.503653	0.00652429		1.40533	-0.10605	0.0152633		1.40561	0.212539	0.00972788		1.40392	-0.076981	0.00566181
1.40635	-0.349089	0.0256998			1.40692	0.503954	0.00652883		1.40616	-0.105209	0.0153254		1.40644	0.212778	0.0097315		1.40475	-0.077837	0.00564738
1.40718	-0.350771	0.0255655			1.40776	0.504265	0.00653353		1.40699	-0.105361	0.0153142		1.40727	0.214511	0.00975773		1.40559	-0.079203	0.00562435
1.40801	-0.350081	0.0256206			1.40859	0.504607	0.00653869		1.40782	-0.10341	0.0154585		1.4081	0.21491	0.00976377		1.40642	-0.079128	0.00562561
1.40884	-0.348065	0.0257815			1.40942	0.504238	0.00653312		1.40865	-0.104455	0.0153812		1.40894	0.215096	0.00976659		1.40725	-0.079187	0.00562462
1.40968	-0.346953	0.0258703			1.41025	0.504797	0.00654156		1.40949	-0.104461	0.0153807		1.40977	0.21475	0.00976135		1.40808	-0.078278	0.00563994
1.41051	-0.346249	0.0259265			1.41108	0.504625	0.00653897		1.41032	-0.104743	0.0153599		1.4106	0.21474	0.0097612		1.40891	-0.079836	0.00561367
1.41134	-0.346292	0.0259231			1.41192	0.504781	0.00654132		1.41115	-0.104487	0.0153788		1.41143	0.215537	0.00977327		1.40974	-0.08119	0.00559084
1.41217	-0.345188	0.0260112			1.41275	0.505667	0.0065547		1.41198	-0.105376	0.0153131		1.41227	0.216682	0.0097906		1.41057	-0.081905	0.00557879
1.41301	-0.345577	0.0259801			1.41358	0.506582	0.00656851		1.41281	-0.105328	0.0153166		1.4131	0.218017	0.00981081		1.4114	-0.079728	0.00561549
1.41384	-0.345867	0.025957			1.41441	0.50708	0.00657603		1.41365	-0.106146	0.0152562		1.41393	0.218822	0.009823		1.41223	-0.079966	0.00561148
1.41467	-0.34556	0.0259815			1.41525	0.507069	0.00657587		1.41448	-0.10577	0.015284		1.41476	0.220183	0.0098436		1.41307	-0.081755	0.00558132
1.4155	-0.346211	0.0259295			1.41608	0.50771	0.00658555		1.41531	-0.10798	0.0151205		1.41559	0.220319	0.00984566		1.4139	-0.081792	0.00558069
1.41633	-0.347414	0.0258335			1.41691	0.507892	0.00658829		1.41614	-0.1083	0.0150969		1.41643	0.220387	0.00984669		1.41473	-0.082831	0.00556317
1.41717	-0.347759	0.025806			1.41775	0.507686	0.00658518		1.41698	-0.106964	0.0151957		1.41726	0.221526	0.00986393		1.41556	-0.084701	0.00553164
1.418	-0.34763	0.0258163			1.41858	0.506528	0.0065677		1.41781	-0.106688	0.0152161		1.41809	0.222262	0.00987507		1.41639	-0.085275	0.00552196
1.41883	-0.346559	0.0259018			1.41941	0.505342	0.00654979		1.41864	-0.104888	0.0153492		1.41892	0.22268	0.0098814		1.41722	-0.084771	0.00553046
1.41966	-0.346027	0.0259442			1.42024	0.505426	0.00655106		1.41947	-0.105338	0.0153159		1.41976	0.222426	0.00987755		1.41805	-0.085676	0.0055152
1.42049	-0.345845	0.0259587			1.42108	0.504552	0.00653786		1.4203	-0.105827	0.0152797		1.42059	0.222938	0.00988531		1.41888	-0.086083	0.00550834
1.42133	-0.345197	0.0260105			1.42191	0.502766	0.0065109		1.42114	-0.105536	0.0153013		1.42142	0.223209	0.00988941		1.41972	-0.085635	0.00551589
1.42216	-0.345421	0.0259926			1.42274	0.5024	0.00650537		1.42197	-0.105367	0.0153138		1.42225	0.224542	0.00990959		1.42055	-0.087037	0.00549225
1.42299	-0.346149	0.0259345			1.42357	0.502199	0.00650234		1.4228	-0.104913	0.0153473		1.42308	0.225446	0.00992327		1.42138	-0.086176	0.00550677
1.42382	-0.347291	0.0258433			1.4244	0.501646	0.00649399		1.42363	-0.103976	0.0154166		1.42392	0.225368	0.00992209		1.42221	-0.085609	0.00551633
1.42466	-0.348184	0.025772			1.42524	0.502237	0.00650291		1.42446	-0.10503	0.0153387		1.42475	0.226572	0.00994032		1.42304	-0.085873	0.00551188
1.42549	-0.348096	0.0257791			1.42607	0.503373	0.00652006		1.42529	-0.105864	0.015277		1.42558	0.22738	0.00995255		1.42387	-0.086184	0.00550664
1.42632	-0.348925	0.0257129			1.4269	0.504526	0.00653747		1.42613	-0.106423	0.0152357		1.42641	0.2278	0.00995891		1.4247	-0.086924	0.00549416
1.42715	-0.347099	0.0258586			1.42773	0.50481	0.00654176		1.42696	-0.107034	0.0151905		1.42725	0.229173	0.00997969		1.42553	-0.088436	0.00546866
1.42798	-0.345123	0.0260164			1.42857	0.504139	0.00653163		1.42779	-0.107342	0.0151677		1.42808	0.229708	0.00998779		1.42637	-0.088424	0.00546887
1.42881	-0.345973	0.0259485			1.4294	0.505041	0.00654525		1.42862	-0.107781	0.0151353		1.42891	0.230919	0.0100061		1.4272	-0.089016	0.00545888
1.42965	-0.346502	0.0259063			1.43023	0.506156	0.00656208		1.42946	-0.107919	0.0151251		1.42974	0.232023	0.0100228		1.42803	-0.090223	0.00543853
1.43048	-0.346621	0.0258968			1.43107	0.505563	0.00655313		1.43029	-0.106552	0.0152261		1.43057	0.233503	0.0100452		1.42886	-0.089957	0.00544302
1.43131	-0.344474	0.0260682			1.4319	0.505947	0.00655893		1.43112	-0.105619	0.0152951		1.43141	0.234324	0.0100577		1.42969	-0.08919	0.00545595
1.43214	-0.343462	0.026149			1.43273	0.506151	0.00656201		1.43195	-0.106099	0.0152596		1.43224	0.23494	0.010067		1.43052	-0.08921	0.00545561
1.43298	-0.344352	0.0260779			1.43356	0.505932	0.0065587		1.43278	-0.106178	0.0152538		1.43307	0.234969	0.0100674		1.43135	-0.088353	0.00547006
1.43381	-0.3446	0.0260581			1.4344	0.506456	0.00656661		1.43362	-0.104656	0.0153663		1.4339	0.234501	0.0100604		1.43218	-0.090047	0.0054415
1.43464	-0.344886	0.0260353			1.43523	0.506445	0.00656645		1.43445	-0.105216	0.0153249		1.43474	0.234932	0.0100669		1.43301	-0.089618	0.00544873
1.43547	-0.345452	0.0259901			1.43606	0.505591	0.00655355		1.43528	-0.105926	0.0152724		1.43557	0.235446	0.0100747		1.43385	-0.088842	0.00546182
1.4363	-0.347624	0.0258167			1.43689	0.505303	0.0065492		1.43611	-0.104674	0.015365		1.4364	0.236107	0.0100847		1.43468	-0.089448	0.0054516
1.43714	-0.347449	0.0258307			1.43772	0.504672	0.00653968		1.43694	-0.103191	0.0154746		1.43723	0.237549	0.0101065		1.43551	-0.089123	0.00545708
1.43797	-0.348058	0.0257821			1.43856	0.504635	0.00653912		1.43778	-0.104536	0.0153752		1.43806	0.237748	0.0101095		1.43634	-0.088764	0.00546313
1.4388	-0.348904	0.0257146			1.43939	0.505595	0.00655361		1.43861	-0.105596	0.0152968		1.4389	0.238198	0.0101163		1.43717	-0.089558	0.00544974
1.43963	-0.349465	0.0256698			1.44022	0.506713	0.00657049		1.43944	-0.107027	0.015191		1.43973	0.238546	0.0101216		1.438	-0.091004	0.00542536
1.44047	-0.350308	0.0256025			1.44105	0.506669	0.00656983		1.44027	-0.107276	0.0151726		1.44056	0.238405	0.0101195		1.43883	-0.091046	0.00542466
1.4413	-0.350959	0.0255505			1.44189	0.507879	0.0065881		1.4411	-0.106409	0.0152367		1.44139	0.237527	0.0101062		1.43966	-0.09021	0.00543875
1.44213	-0.352412	0.0254345			1.44272	0.508101	0.00659145		1.44194	-0.105775	0.0152836		1.44223	0.237422	0.0101046		1.4405	-0.090181	0.00543924
1.44296	-0.353054	0.0253833			1.44355	0.508715	0.00660072		1.44277	-0.105863	0.0152771		1.44306	0.23884	0.010126		1.44133	-0.090838	0.00542816
1.44379	-0.354849	0.02524			1.44439	0.509298	0.00660952		1.4436	-0.106982	0.0151943		1.44389	0.239475	0.0101357		1.44216	-0.092519	0.00539982
1.44463	-0.354292	0.0252845			1.44522	0.510777	0.00663186		1.44443	-0.108347	0.0150934		1.44472	0.242047	0.0101746		1.44299	-0.093884	0.0053768
1.44546	-0.353362	0.0253587			1.44605	0.50943	0.00661152		1.44527	-0.108556	0.015078		1.44555	0.24171	0.0101695		1.44382	-0.094107	0.00537304
1.44629	-0.352963	0.0253905			1.44688	0.507597	0.00658384		1.4461	-0.108023	0.0151174		1.44639	0.241358	0.0101642		1.44465	-0.093876	0.00537694
1.44712	-0.353764	0.0253266			1.44772	0.505779	0.00655639		1.44693	-0.107657	0.0151444		1.44722	0.241067	0.0101598		1.44548	-0.093641	0.0053809
1.44796	-0.355314	0.0252029			1.44855	0.505786	0.0065565		1.44776	-0.107508	0.0151554		1.44805	0.240766	0.0101552		1.44631	-0.093204	0.00538827
1.44879	-0.355218	0.0252105			1.44938	0.506165	0.00656222		1.44859	-0.108065	0.0151143		1.44888	0.239423	0.0101349		1.44715	-0.093908	0.0053764
1.44962	-0.355117	0.0252186			1.45021	0.505124	0.0065465		1.44942	-0.108604	0.0150744		1.44972	0.239368	0.010134		1.44798	-0.094076	0.00537356
1.45045	-0.355467	0.0251907			1.45104	0.504647	0.0065393		1.45026	-0.108031	0.0151168		1.45055	0.23943	0.010135		1.44881	-0.094103	0.00537311
1.45128	-0.356975	0.0250703			1.45188	0.505069	0.00654567		1.45109	-0.108698	0.0150675		1.45138	0.239144	0.0101306		1.44964	-0.093868	0.00537707
1.45212	-0.359376	0.0248786			1.45271	0.505274	0.00654877		1.45192	-0.109363	0.0150183		1.45221	0.238875	0.0101266		1.45047	-0.094244	0.00537073
1.45295	-0.36113	0.0247386			1.45354	0.505908	0.00655834		1.45275	-0.109358	0.0150187		1.45304	0.238667	0.0101234		1.4513	-0.094254	0.00537056
1.45378	-0.361586	0.0247022			1.45437	0.506611	0.00656895		1.45358	-0.109278	0.0150246		1.45388	0.239549	0.0101368		1.45213	-0.094498	0.00536645
1.45461	-0.361809	0.0246844			1.45521	0.506214	0.00656296		1.45442	-0.109792	0.0149866		1.45471	0.239554	0.0101368		1.45296	-0.094654	0.00536382
1.45545	-0.362036	0.0246663			1.45604	0.505813	0.0065569		1.45525	-0.108699	0.0150674		1.45554	0.239306	0.0101331		1.45379	-0.095416	0.00535097
1.45628	-0.362003	0.0246689			1.45687	0.505725	0.00655557		1.45608	-0.108003	0.0151188		1.45637	0.239094	0.0101299		1.45463	-0.095332	0.00535239
1.45711	-0.360876	0.0247589			1.45771	0.504533	0.00653758		1.45691	-0.107265	0.0151734		1.45721	0.238345	0.0101185		1.45546	-0.095002	0.00535795
1.45794	-0.360806	0.0247645			1.45854	0.503771	0.00652607		1.45775	-0.107481	0.0151574		1.45804	0.237854	0.0101111		1.45629	-0.095692	0.00534632
1.45877	-0.361579	0.0247028			1.45937	0.504135	0.00653157		1.45858	-0.107813	0.0151329		1.45887	0.237186	0.010101		1.45712	-0.095066	0.00535687
1.45961	-0.362026	0.0246671			1.4602	0.503954	0.00652883		1.45941	-0.107562	0.0151515		1.4597	0.237397	0.0101042		1.45795	-0.094177	0.00537186
1.46044	-0.362451	0.0246331			1.46104	0.503414	0.00652068		1.46024	-0.107546	0.0151526		1.46053	0.236668	0.0100932		1.45878	-0.092316	0.00540324
1.46127	-0.363078	0.0245831			1.46187	0.503861	0.00652743		1.46107	-0.107728	0.0151392		1.46137	0.237544	0.0101064		1.45961	-0.091668	0.00541417
1.4621	-0.361993	0.0246697			1.4627	0.503675	0.00652462		1.46191	-0.109619	0.0149994		1.4622	0.238436	0.0101199		1.46044	-0.091773	0.0054124
1.46293	-0.361275	0.024727			1.46353	0.503737	0.00652556		1.46274	-0.110619	0.0149254		1.46303	0.238764	0.0101249		1.46128	-0.092152	0.00540601
1.46377	-0.360712	0.024772			1.46436	0.504479	0.00653676		1.46357	-0.111937	0.014828		1.46386	0.237661	0.0101082		1.46211	-0.090459	0.00543455
1.4646	-0.359858	0.0248401			1.4652	0.503639	0.00652408		1.4644	-0.111764	0.0148408		1.4647	0.237389	0.0101041		1.46294	-0.090015	0.00544204
1.46543	-0.360225	0.0248108			1.46603	0.502738	0.00651047		1.46523	-0.110725	0.0149176		1.46553	0.236155	0.0100854		1.46377	-0.088812	0.00546232
1.46626	-0.359238	0.0248896			1.46686	0.502619	0.00650868		1.46607	-0.110949	0.014901		1.46636	0.236578	0.0100918		1.4646	-0.08848	0.00546792
1.4671	-0.359516	0.0248674			1.46769	0.502958	0.0065138		1.4669	-0.111167	0.0148849		1.46719	0.236435	0.0100896		1.46543	-0.088119	0.00547401
1.46793	-0.358423	0.0249547			1.46853	0.503209	0.00651759		1.46773	-0.111558	0.014856		1.46802	0.235955	0.0100824		1.46626	-0.088239	0.00547199
1.46876	-0.359547	0.024865			1.46936	0.503075	0.00651556		1.46856	-0.110614	0.0149258		1.46886	0.235968	0.0100826		1.4671	-0.088495	0.00546767
1.46959	-0.359892	0.0248374			1.47019	0.502255	0.00650318		1.46939	-0.108854	0.0150559		1.46969	0.235485	0.0100752		1.46793	-0.088607	0.00546578
1.47042	-0.359638	0.0248577			1.47103	0.501742	0.00649544		1.47023	-0.109001	0.0150451		1.47052	0.234302	0.0100573		1.46876	-0.088115	0.00547408
1.47126	-0.360876	0.0247589			1.47186	0.500943	0.00648337		1.47106	-0.110197	0.0149566		1.47135	0.233364	0.0100431		1.46959	-0.088062	0.00547497
1.47209	-0.361055	0.0247446			1.47269	0.500185	0.00647193		1.47189	-0.110684	0.0149206		1.47219	0.233453	0.0100445		1.47042	-0.089195	0.00545587
1.47292	-0.361354	0.0247207			1.47352	0.499739	0.00646519		1.47272	-0.110833	0.0149096		1.47302	0.232908	0.0100362		1.47125	-0.089978	0.00544266
1.47375	-0.360419	0.0247954			1.47436	0.498064	0.0064399		1.47355	-0.111615	0.0148518		1.47385	0.23312	0.0100394		1.47208	-0.089741	0.00544666
1.47458	-0.359503	0.0248685			1.47519	0.496996	0.00642377		1.47439	-0.111398	0.0148678		1.47468	0.231638	0.010017		1.47291	-0.090483	0.00543415
1.47542	-0.359189	0.0248935			1.47602	0.497314	0.00642858		1.47522	-0.11127	0.0148773		1.47551	0.231632	0.0100169		1.47375	-0.09003	0.00544179
1.47625	-0.357809	0.0250037			1.47685	0.497466	0.00643087		1.47605	-0.111669	0.0148478		1.47635	0.230718	0.0100031		1.47458	-0.089047	0.00545836
1.47708	-0.358119	0.024979			1.47768	0.497964	0.00643839		1.47688	-0.111737	0.0148428		1.47718	0.229181	0.00997982		1.47541	-0.088905	0.00546076
1.47791	-0.357792	0.0250051			1.47852	0.499168	0.00645657		1.47771	-0.11277	0.0147664		1.47801	0.231056	0.0100082		1.47624	-0.088838	0.00546189
1.47874	-0.358276	0.0249664			1.47935	0.499849	0.00646685		1.47855	-0.113236	0.0147319		1.47884	0.230998	0.0100073		1.47707	-0.088641	0.00546521
1.47958	-0.358224	0.0249706			1.48018	0.499177	0.00645671		1.47938	-0.112381	0.0147951		1.47968	0.232433	0.010029		1.4779	-0.088311	0.00547077
1.48041	-0.357444	0.0250328			1.48101	0.499546	0.00646228		1.48021	-0.112598	0.0147791		1.48051	0.231713	0.0100181		1.47873	-0.088925	0.00546042
1.48124	-0.357481	0.0250299			1.48185	0.500155	0.00647147		1.48104	-0.112372	0.0147958		1.48134	0.230508	0.0099999		1.47956	-0.090514	0.00543363
1.48207	-0.355579	0.0251817			1.48268	0.499195	0.00645698		1.48188	-0.1114	0.0148677		1.48217	0.229203	0.00998015		1.48039	-0.089126	0.00545703
1.48291	-0.357028	0.025066			1.48351	0.498895	0.00645245		1.48271	-0.109723	0.0149917		1.483	0.228919	0.00997585		1.48123	-0.089006	0.00545905
1.48374	-0.358003	0.0249882			1.48435	0.498782	0.00645074		1.48354	-0.109192	0.0150309		1.48384	0.226515	0.00993946		1.48206	-0.089129	0.00545698
1.48457	-0.357925	0.0249944			1.48518	0.497693	0.0064343		1.48437	-0.108703	0.0150671		1.48467	0.226702	0.00994229		1.48289	-0.090156	0.00543966
1.4854	-0.35752	0.0250268			1.48601	0.497532	0.00643187		1.4852	-0.108772	0.015062		1.4855	0.227137	0.00994887		1.48372	-0.089928	0.00544351
1.48623	-0.357057	0.0250637			1.48684	0.49667	0.00641885		1.48603	-0.108635	0.0150721		1.48633	0.22777	0.00995846		1.48455	-0.090558	0.00543288
1.48707	-0.357309	0.0250436			1.48768	0.496568	0.00641731		1.48687	-0.10838	0.015091		1.48717	0.227995	0.00996186		1.48538	-0.090169	0.00543944
1.4879	-0.35824	0.0249693			1.48851	0.496907	0.00642243		1.4877	-0.108503	0.0150819		1.488	0.230481	0.0099995		1.48621	-0.090064	0.00544121
1.48873	-0.359278	0.0248864			1.48934	0.49674	0.00641991		1.48853	-0.108722	0.0150657		1.48883	0.231681	0.0100177		1.48704	-0.090037	0.00544167
1.48956	-0.357438	0.0250333			1.49017	0.496317	0.00641352		1.48936	-0.109403	0.0150153		1.48966	0.230838	0.0100049		1.48788	-0.089691	0.0054475
1.49039	-0.357586	0.0250215			1.491	0.49736	0.00642927		1.49019	-0.110271	0.0149512		1.49049	0.231668	0.0100175		1.48871	-0.090626	0.00543174
1.49123	-0.357085	0.0250615			1.49184	0.49828	0.00644316		1.49103	-0.109466	0.0150107		1.49133	0.232217	0.0100258		1.48954	-0.090967	0.00542599
1.49206	-0.355061	0.0252231			1.49267	0.498876	0.00645216		1.49186	-0.109007	0.0150446		1.49216	0.232277	0.0100267		1.49037	-0.091433	0.00541813
1.49289	-0.35409	0.0253006			1.4935	0.498362	0.0064444		1.49269	-0.108429	0.0150873		1.49299	0.231409	0.0100135		1.4912	-0.090547	0.00543307
1.49372	-0.354811	0.025243			1.49433	0.498135	0.00644097		1.49352	-0.108936	0.0150499		1.49382	0.23177	0.010019		1.49203	-0.089894	0.00544408
1.49456	-0.354675	0.0252539			1.49517	0.497674	0.00643401		1.49436	-0.108501	0.015082		1.49466	0.230942	0.0100065		1.49286	-0.090501	0.00543384
1.49539	-0.3554	0.025196			1.496	0.497372	0.00642945		1.49519	-0.108564	0.0150774		1.49549	0.232014	0.0100227		1.49369	-0.089737	0.00544673
1.49622	-0.355023	0.0252261			1.49683	0.496108	0.00641037		1.49602	-0.109045	0.0150418		1.49632	0.233828	0.0100502		1.49453	-0.090363	0.00543617
1.49705	-0.356556	0.0251037			1.49767	0.494703	0.00638915		1.49685	-0.109127	0.0150357		1.49715	0.234652	0.0100626		1.49536	-0.09068	0.00543083
1.49788	-0.356681	0.0250937			1.4985	0.494435	0.00638511		1.49768	-0.109175	0.0150322		1.49798	0.235264	0.0100719		1.49619	-0.090983	0.00542572
1.49872	-0.356434	0.0251135			1.49933	0.493959	0.00637792		1.49852	-0.108808	0.0150593		1.49882	0.233618	0.010047		1.49702	-0.091369	0.00541921
1.49955	-0.356331	0.0251217			1.50016	0.493374	0.00636909		1.49935	-0.108356	0.0150927		1.49965	0.232756	0.0100339		1.49785	-0.090862	0.00542776
1.50038	-0.355898	0.0251563			1.501	0.494115	0.00638027		1.50018	-0.108653	0.0150708		1.50048	0.230651	0.0100021		1.49868	-0.091059	0.00542444
1.50121	-0.357171	0.0250546			1.50183	0.493636	0.00637304		1.50101	-0.108972	0.0150472		1.50131	0.2311	0.0100089		1.49951	-0.092038	0.00540793
1.50205	-0.357745	0.0250088			1.50266	0.493228	0.00636688		1.50184	-0.110151	0.01496		1.50214	0.232148	0.0100247		1.50034	-0.092442	0.00540112
1.50288	-0.359586	0.0248619			1.50349	0.493636	0.00637304		1.50268	-0.110793	0.0149126		1.50298	0.232718	0.0100334		1.50117	-0.093484	0.00538355
1.50371	-0.360118	0.0248194			1.50432	0.493864	0.00637648		1.50351	-0.111459	0.0148633		1.50381	0.23259	0.0100314		1.50201	-0.09361	0.00538142
1.50454	-0.360778	0.0247667			1.50516	0.493884	0.00637679		1.50434	-0.111129	0.0148877		1.50464	0.233374	0.0100433		1.50284	-0.093422	0.00538459
1.50537	-0.360588	0.0247819			1.50599	0.494059	0.00637943		1.50517	-0.110718	0.0149181		1.50547	0.233166	0.0100401		1.50367	-0.093195	0.00538842
1.50621	-0.361979	0.0246708			1.50682	0.494246	0.00638225		1.506	-0.11063	0.0149246		1.50631	0.232206	0.0100256		1.5045	-0.093921	0.00537618
1.50704	-0.362375	0.0246392			1.50765	0.49473	0.00638956		1.50684	-0.110005	0.0149708		1.50714	0.22972	0.00998798		1.50533	-0.093719	0.00537958
1.50787	-0.362937	0.0245944			1.50849	0.495303	0.00639821		1.50767	-0.109273	0.0150249		1.50797	0.227977	0.00996159		1.50616	-0.093376	0.00538537
1.5087	-0.362105	0.0246608			1.50932	0.495371	0.00639924		1.5085	-0.109605	0.0150004		1.5088	0.224911	0.00991517		1.50699	-0.094181	0.00537179
1.50954	-0.361934	0.0246744			1.51015	0.496061	0.00640966		1.50933	-0.109257	0.0150261		1.50963	0.223915	0.0099001		1.50782	-0.094749	0.00536222
1.51037	-0.361738	0.0246901			1.51099	0.497759	0.0064353		1.51016	-0.108999	0.0150452		1.51047	0.223244	0.00988994		1.50866	-0.094774	0.0053618
1.5112	-0.361891	0.0246778			1.51182	0.498495	0.00644641		1.511	-0.108328	0.0150948		1.5113	0.22253	0.00987913		1.50949	-0.093421	0.00538461
1.51203	-0.362963	0.0245923			1.51265	0.498102	0.00644047		1.51183	-0.109664	0.014996		1.51213	0.2215	0.00986354		1.51032	-0.092922	0.00539302
1.51286	-0.363463	0.0245524			1.51348	0.497902	0.00643745		1.51266	-0.110177	0.0149581		1.51296	0.22051	0.00984855		1.51115	-0.091854	0.00541103
1.5137	-0.364023	0.0245077			1.51432	0.498404	0.00644503		1.51349	-0.110849	0.0149084		1.5138	0.219914	0.00983953		1.51198	-0.091456	0.00541774
1.51453	-0.364543	0.0244661			1.51515	0.498718	0.00644978		1.51432	-0.110992	0.0148978		1.51463	0.219562	0.0098342		1.51281	-0.091758	0.00541265
1.51536	-0.365333	0.0244031			1.51598	0.498481	0.0064462		1.51516	-0.111181	0.0148839		1.51546	0.218913	0.00982437		1.51364	-0.092514	0.0053999
1.51619	-0.364525	0.0244676			1.51681	0.498218	0.00644223		1.51599	-0.112084	0.0148171		1.51629	0.218217	0.00981384		1.51447	-0.092377	0.00540221
1.51702	-0.364788	0.0244466			1.51764	0.49859	0.00644784		1.51682	-0.111943	0.0148275		1.51712	0.216895	0.00979382		1.5153	-0.091936	0.00540965
1.51786	-0.365124	0.0244198			1.51848	0.499998	0.0064691		1.51765	-0.111768	0.0148405		1.51796	0.217397	0.00980142		1.51614	-0.091748	0.00541282
1.51869	-0.364325	0.0244836			1.51931	0.500337	0.00647422		1.51849	-0.111906	0.0148303		1.51879	0.217276	0.00979959		1.51697	-0.091201	0.00542204
1.51952	-0.363668	0.024536			1.52014	0.500584	0.00647795		1.51932	-0.112834	0.0147616		1.51962	0.217266	0.00979944		1.5178	-0.089774	0.0054461
1.52035	-0.363687	0.0245345			1.52097	0.501661	0.00649421		1.52015	-0.112785	0.0147653		1.52045	0.218634	0.00982015		1.51863	-0.089462	0.00545136
1.52119	-0.363375	0.0245594			1.52181	0.501898	0.00649779		1.52098	-0.112646	0.0147755		1.52128	0.22032	0.00984567		1.51946	-0.089803	0.00544561
1.52202	-0.363441	0.0245541			1.52264	0.501706	0.00649489		1.52181	-0.112106	0.0148155		1.52212	0.219913	0.00983951		1.52029	-0.089403	0.00545236
1.52285	-0.36299	0.0245901			1.52347	0.501713	0.006495		1.52265	-0.111534	0.0148578		1.52295	0.218951	0.00982495		1.52112	-0.08884	0.00546185
1.52368	-0.363119	0.0245798			1.52431	0.501296	0.0064887		1.52348	-0.112452	0.0147899		1.52378	0.218341	0.00981571		1.52195	-0.089691	0.0054475
1.52451	-0.362948	0.0245935			1.52514	0.500647	0.0064789		1.52431	-0.112751	0.0147678		1.52461	0.217003	0.00979546		1.52279	-0.089481	0.00545104
1.52535	-0.363462	0.0245524			1.52597	0.500432	0.00647566		1.52514	-0.113487	0.0147134		1.52545	0.216953	0.0097947		1.52362	-0.089094	0.00545757
1.52618	-0.364702	0.0244535			1.5268	0.499492	0.00646146		1.52597	-0.113486	0.0147134		1.52628	0.216756	0.00979172		1.52445	-0.089212	0.00545558
1.52701	-0.365713	0.0243728			1.52764	0.499	0.00645403		1.5268	-0.11298	0.0147508		1.52711	0.217164	0.0097979		1.52528	-0.088737	0.00546359
1.52784	-0.365674	0.0243759			1.52847	0.499105	0.00645562		1.52764	-0.114341	0.0146502		1.52794	0.219285	0.00983		1.52611	-0.088823	0.00546214
1.52867	-0.367353	0.0242418			1.5293	0.498822	0.00645135		1.52847	-0.11507	0.0145963		1.52877	0.220394	0.00984679		1.52694	-0.089343	0.00545337
1.52951	-0.369072	0.0241046			1.53013	0.498992	0.00645391		1.5293	-0.114901	0.0146088		1.52961	0.221696	0.0098665		1.52777	-0.09013	0.0054401
1.53034	-0.369612	0.0240615			1.53096	0.49826	0.00644286		1.53013	-0.11481	0.0146155		1.53044	0.221813	0.00986827		1.5286	-0.090998	0.00542546
1.53117	-0.370839	0.0239636			1.5318	0.497162	0.00642628		1.53096	-0.114707	0.0146232		1.53127	0.222235	0.00987466		1.52944	-0.090856	0.00542786
1.532	-0.371536	0.0239079			1.53263	0.497253	0.00642766		1.5318	-0.115382	0.0145732		1.5321	0.221526	0.00986393		1.53027	-0.091194	0.00542216
1.53283	-0.372199	0.023855			1.53346	0.496996	0.00642377		1.53263	-0.114255	0.0146566		1.53294	0.22121	0.00985915		1.5311	-0.091609	0.00541516
1.53367	-0.37281	0.0238062			1.53429	0.497473	0.00643098		1.53346	-0.112633	0.0147765		1.53377	0.221639	0.00986564		1.53193	-0.091814	0.00541171
1.5345	-0.372832	0.0238045			1.53513	0.497504	0.00643145		1.53429	-0.11163	0.0148507		1.5346	0.222519	0.00987896		1.53276	-0.092549	0.00539931
1.53533	-0.371804	0.0238865			1.53596	0.497401	0.00642989		1.53513	-0.110559	0.0149299		1.53543	0.223703	0.00989689		1.53359	-0.091066	0.00542432
1.53616	-0.371913	0.0238778			1.53679	0.498181	0.00644167		1.53596	-0.110976	0.014899		1.53626	0.224388	0.00990726		1.53442	-0.088904	0.00546077
1.537	-0.373056	0.0237866			1.53762	0.499213	0.00645725		1.53679	-0.110924	0.0149029		1.5371	0.224696	0.00991192		1.53525	-0.089112	0.00545727
1.53783	-0.374408	0.0236787			1.53846	0.499126	0.00645594		1.53762	-0.111011	0.0148964		1.53793	0.224902	0.00991504		1.53609	-0.089252	0.0054549
1.53866	-0.375603	0.0235833			1.53929	0.498961	0.00645344		1.53845	-0.111125	0.014888		1.53876	0.224107	0.009903		1.53692	-0.08959	0.00544921
1.53949	-0.375402	0.0235993			1.54012	0.498639	0.00644858		1.53929	-0.111026	0.0148953		1.53959	0.224289	0.00990576		1.53775	-0.089515	0.00545047
1.54032	-0.377065	0.0234666			1.54095	0.497593	0.00643279		1.54012	-0.110997	0.0148975		1.54043	0.224819	0.00991378		1.53858	-0.089299	0.00545411
1.54116	-0.378195	0.0233764			1.54179	0.49625	0.00641251		1.54095	-0.11053	0.014932		1.54126	0.223373	0.00989189		1.53941	-0.089856	0.00544472
1.54199	-0.37755	0.0234278			1.54262	0.495397	0.00639963		1.54178	-0.109761	0.0149889		1.54209	0.223853	0.00989916		1.54024	-0.090744	0.00542975
1.54282	-0.376923	0.0234779			1.54345	0.494745	0.00638979		1.54261	-0.108147	0.0151082		1.54292	0.223951	0.00990064		1.54107	-0.090032	0.00544175
1.54365	-0.376706	0.0234952			1.54428	0.493508	0.00637111		1.54345	-0.107643	0.0151455		1.54375	0.224301	0.00990594		1.5419	-0.089385	0.00545266
1.54449	-0.376846	0.023484			1.54512	0.494439	0.00638517		1.54428	-0.107176	0.01518		1.54459	0.223636	0.00989587		1.54273	-0.088392	0.00546941
1.54532	-0.377105	0.0234634			1.54595	0.495456	0.00640052		1.54511	-0.107601	0.0151486		1.54542	0.225646	0.0099263		1.54357	-0.089282	0.0054544
1.54615	-0.376749	0.0234918			1.54678	0.495111	0.00639531		1.54594	-0.107744	0.015138		1.54625	0.226819	0.00994406		1.5444	-0.089266	0.00545467
1.54698	-0.375814	0.0235664			1.54761	0.49586	0.00640662		1.54677	-0.107875	0.0151283		1.54708	0.227558	0.00995525		1.54523	-0.089442	0.0054517
1.54781	-0.373349	0.0237632			1.54845	0.496573	0.00641739		1.54761	-0.10841	0.0150888		1.54792	0.227118	0.00994858		1.54606	-0.089406	0.00545231
1.54865	-0.373167	0.0237777			1.54928	0.497206	0.00642695		1.54844	-0.108455	0.0150854		1.54875	0.226499	0.00993921		1.54689	-0.088398	0.0054693
1.54948	-0.371454	0.0239145			1.55011	0.497652	0.00643368		1.54927	-0.108645	0.0150714		1.54958	0.225769	0.00992816		1.54772	-0.087986	0.00547625
1.55031	-0.369655	0.0240581			1.55094	0.496964	0.00642329		1.5501	-0.109092	0.0150383		1.55041	0.224656	0.00991131		1.54855	-0.086897	0.00549461
1.55114	-0.368961	0.0241135			1.55178	0.497285	0.00642814		1.55093	-0.109223	0.0150286		1.55124	0.224793	0.00991339		1.54939	-0.08621	0.0055062
1.55198	-0.368488	0.0241512			1.55261	0.497688	0.00643422		1.55177	-0.109563	0.0150035		1.55208	0.224204	0.00990447		1.55022	-0.08673	0.00549743
1.55281	-0.368539	0.0241472			1.55344	0.496971	0.0064234		1.5526	-0.109616	0.0149996		1.55291	0.225192	0.00991943		1.55105	-0.086631	0.0054991
1.55364	-0.368075	0.0241842			1.55427	0.496288	0.00641308		1.55343	-0.110419	0.0149402		1.55374	0.224957	0.00991587		1.55188	-0.088036	0.00547541
1.55447	-0.367773	0.0242083			1.55511	0.495228	0.00639708		1.55426	-0.11218	0.01481		1.55457	0.22457	0.00991001		1.55271	-0.088436	0.00546866
1.5553	-0.368807	0.0241258			1.55594	0.495555	0.00640202		1.55509	-0.114282	0.0146546		1.55541	0.223745	0.00989752		1.55354	-0.088466	0.00546816
1.55614	-0.369765	0.0240493			1.55677	0.496022	0.00640907		1.55593	-0.115985	0.0145287		1.55624	0.222554	0.00987949		1.55437	-0.089355	0.00545317
1.55697	-0.368708	0.0241337			1.5576	0.496276	0.0064129		1.55676	-0.114324	0.0146515		1.55707	0.222082	0.00987235		1.5552	-0.090685	0.00543074
1.5578	-0.368584	0.0241436			1.55844	0.496153	0.00641105		1.55759	-0.113528	0.0147103		1.5579	0.220993	0.00985586		1.55604	-0.09068	0.00543083
1.55863	-0.368191	0.0241749			1.55927	0.495192	0.00639654		1.55842	-0.113609	0.0147043		1.55873	0.220631	0.00985038		1.55687	-0.0899	0.00544398
1.55946	-0.367334	0.0242434			1.5601	0.494684	0.00638887		1.55926	-0.113575	0.0147069		1.55957	0.220504	0.00984846		1.5577	-0.090549	0.00543304
1.5603	-0.36795	0.0241942			1.56093	0.495227	0.00639706		1.56009	-0.1139	0.0146828		1.5604	0.219865	0.00983879		1.55853	-0.091202	0.00542202
1.56113	-0.367617	0.0242208			1.56177	0.495862	0.00640665		1.56092	-0.113531	0.0147101		1.56123	0.219111	0.00982737		1.55936	-0.092562	0.00539909
1.56196	-0.367364	0.024241			1.5626	0.49603	0.00640919		1.56175	-0.114385	0.014647		1.56206	0.218314	0.00981531		1.56019	-0.092335	0.00540292
1.56279	-0.369277	0.0240882			1.56343	0.495574	0.0064023		1.56258	-0.115913	0.014534		1.5629	0.216955	0.00979473		1.56102	-0.092388	0.00540203
1.56363	-0.370484	0.0239919			1.56426	0.494874	0.00639173		1.56341	-0.117343	0.0144283		1.56373	0.216146	0.00978248		1.56185	-0.092727	0.00539631
1.56446	-0.372148	0.0238591			1.5651	0.495193	0.00639655		1.56425	-0.11804	0.0143767		1.56456	0.216056	0.00978112		1.56269	-0.093395	0.00538505
1.56529	-0.370643	0.0239792			1.56593	0.494277	0.00638272		1.56508	-0.11833	0.0143553		1.56539	0.216873	0.00979349		1.56352	-0.094186	0.00537171
1.56612	-0.369406	0.024078			1.56676	0.493046	0.00636413		1.56591	-0.117581	0.0144107		1.56622	0.215006	0.00976523		1.56435	-0.09415	0.00537232
1.56695	-0.368832	0.0241238			1.56759	0.49359	0.00637235		1.56674	-0.117179	0.0144404		1.56706	0.214798	0.00976208		1.56518	-0.094677	0.00536343
1.56779	-0.368852	0.0241222			1.56843	0.493599	0.00637248		1.56757	-0.117484	0.0144178		1.56789	0.213279	0.00973908		1.56601	-0.095497	0.0053496
1.56862	-0.370276	0.0240085			1.56926	0.493198	0.00636643		1.56841	-0.118068	0.0143746		1.56872	0.212596	0.00972874		1.56684	-0.096124	0.00533903
1.56945	-0.370017	0.0240292			1.57009	0.492127	0.00635026		1.56924	-0.117998	0.0143798		1.56955	0.211901	0.00971822		1.56767	-0.09771	0.00531229
1.57028	-0.371042	0.0239474			1.57092	0.490836	0.00633076		1.57007	-0.11802	0.0143782		1.57039	0.213042	0.00973549		1.5685	-0.099504	0.00528204
1.57112	-0.370165	0.0240174			1.57176	0.490537	0.00632625		1.5709	-0.117617	0.014408		1.57122	0.213757	0.00974632		1.56933	-0.100287	0.00526884
1.57195	-0.371384	0.0239201			1.57259	0.490993	0.00633313		1.57174	-0.117111	0.0144454		1.57205	0.21287	0.00973289		1.57017	-0.100685	0.00526213
1.57278	-0.37262	0.0238214			1.57342	0.490917	0.00633199		1.57257	-0.116657	0.014479		1.57288	0.214505	0.00975764		1.571	-0.100733	0.00526132
1.57361	-0.372047	0.0238671			1.57425	0.49055	0.00632645		1.5734	-0.115844	0.0145391		1.57371	0.215147	0.00976736		1.57183	-0.100745	0.00526112
1.57444	-0.371296	0.0239271			1.57509	0.491234	0.00633677		1.57423	-0.115146	0.0145907		1.57455	0.21501	0.00976529		1.57266	-0.099821	0.0052767
1.57527	-0.372285	0.0238481			1.57592	0.492303	0.00635291		1.57506	-0.113217	0.0147333		1.57538	0.215226	0.00976856		1.57349	-0.098821	0.00529356
1.57611	-0.371905	0.0238785			1.57675	0.49222	0.00635166		1.5759	-0.11206	0.0148189		1.57621	0.214821	0.00976243		1.57432	-0.099001	0.00529052
1.57694	-0.371717	0.0238935			1.57758	0.491759	0.0063447		1.57673	-0.112009	0.0148226		1.57704	0.214599	0.00975907		1.57515	-0.099837	0.00527643
1.57777	-0.37277	0.0238094			1.57842	0.491499	0.00634078		1.57756	-0.113192	0.0147352		1.57788	0.21417	0.00975257		1.57598	-0.100476	0.00526565
1.5786	-0.372943	0.0237956			1.57925	0.490546	0.00632639		1.57839	-0.113122	0.0147404		1.57871	0.214174	0.00975263		1.57682	-0.100939	0.00525784
1.57944	-0.372197	0.0238552			1.58008	0.48979	0.00631497		1.57922	-0.112887	0.0147577		1.57954	0.214225	0.0097534		1.57765	-0.101636	0.00524609
1.58027	-0.370921	0.023957			1.58091	0.488716	0.00629875		1.58006	-0.11377	0.0146924		1.58037	0.2136	0.00974394		1.57848	-0.101675	0.00524543
1.5811	-0.371407	0.0239182			1.58175	0.487545	0.00628107		1.58089	-0.114286	0.0146543		1.5812	0.213293	0.00973929		1.57931	-0.102376	0.00523361
1.58193	-0.37123	0.0239323			1.58258	0.487267	0.00627688		1.58172	-0.115698	0.0145499		1.58204	0.213494	0.00974234		1.58014	-0.103393	0.00521647
1.58276	-0.371237	0.0239318			1.58341	0.487001	0.00627286		1.58255	-0.115099	0.0145942		1.58287	0.214637	0.00975964		1.58097	-0.10362	0.00521264
1.5836	-0.370213	0.0240135			1.58424	0.487249	0.0062766		1.58338	-0.114229	0.0146585		1.5837	0.214794	0.00976202		1.5818	-0.103449	0.00521552
1.58443	-0.370188	0.0240155			1.58508	0.487023	0.00627319		1.58422	-0.114446	0.0146425		1.58453	0.2149	0.00976362		1.58263	-0.104009	0.00520608
1.58526	-0.369528	0.0240682			1.58591	0.487027	0.00627325		1.58505	-0.113946	0.0146794		1.58537	0.214181	0.00975274		1.58346	-0.104371	0.00519998
1.58609	-0.370652	0.0239785			1.58674	0.487511	0.00628056		1.58588	-0.113072	0.014744		1.5862	0.213064	0.00973583		1.5843	-0.104129	0.00520406
1.58693	-0.371874	0.0238809			1.58757	0.486797	0.00626978		1.58671	-0.112726	0.0147696		1.58703	0.21366	0.00974485		1.58513	-0.104485	0.00519805
1.58776	-0.371774	0.0238889			1.58841	0.485912	0.00625642		1.58754	-0.112857	0.0147599		1.58786	0.213005	0.00973493		1.58596	-0.104977	0.00518976
1.58859	-0.371919	0.0238773			1.58924	0.485417	0.00624894		1.58838	-0.112666	0.0147741		1.58869	0.212987	0.00973466		1.58679	-0.104092	0.00520468
1.58942	-0.372533	0.0238283			1.59007	0.484608	0.00623673		1.58921	-0.111693	0.014846		1.58953	0.212719	0.00973061		1.58762	-0.103358	0.00521706
1.59025	-0.372595	0.0238234			1.5909	0.484793	0.00623952		1.59004	-0.111596	0.0148532		1.59036	0.213249	0.00973863		1.58845	-0.102621	0.00522948
1.59109	-0.372266	0.0238496			1.59174	0.485728	0.00625364		1.59087	-0.112059	0.0148189		1.59119	0.211652	0.00971445		1.58928	-0.101526	0.00524795
1.59192	-0.373525	0.0237491			1.59257	0.485874	0.00625584		1.5917	-0.111876	0.0148325		1.59202	0.211417	0.00971089		1.59011	-0.100964	0.00525742
1.59275	-0.373212	0.0237741			1.5934	0.485228	0.00624609		1.59254	-0.111726	0.0148436		1.59286	0.212315	0.00972449		1.59095	-0.099946	0.00527459
1.59358	-0.37277	0.0238094			1.59423	0.484872	0.00624071		1.59337	-0.112108	0.0148153		1.59369	0.211608	0.00971379		1.59178	-0.098676	0.005296
1.59441	-0.372709	0.0238143			1.59507	0.484718	0.00623839		1.5942	-0.112233	0.0148061		1.59452	0.210726	0.00970043		1.59261	-0.098326	0.0053019
1.59525	-0.372567	0.0238256			1.5959	0.484348	0.0062328		1.59503	-0.111556	0.0148561		1.59535	0.211363	0.00971008		1.59344	-0.098875	0.00529265
1.59608	-0.372952	0.0237949			1.59673	0.483016	0.00621269		1.59587	-0.111953	0.0148268		1.59618	0.211647	0.00971438		1.59427	-0.100145	0.00527123
1.59691	-0.373451	0.0237551			1.59756	0.482567	0.00620591		1.5967	-0.1123	0.0148011		1.59702	0.213069	0.0097359		1.5951	-0.10041	0.00526676
1.59774	-0.373287	0.0237681			1.5984	0.483033	0.00621295		1.59753	-0.11129	0.0148758		1.59785	0.212736	0.00973086		1.59593	-0.099662	0.00527938
1.59858	-0.372531	0.0238285			1.59923	0.482471	0.00620446		1.59836	-0.110497	0.0149344		1.59868	0.212821	0.00973215		1.59676	-0.098744	0.00529486
1.59941	-0.371977	0.0238727			1.60006	0.482796	0.00620937		1.59919	-0.110907	0.0149041		1.59951	0.213372	0.00974049		1.5976	-0.097926	0.00530865
1.60024	-0.372071	0.0238652			1.60089	0.483112	0.00621414		1.60003	-0.112126	0.014814		1.60034	0.212471	0.00972685		1.59843	-0.09767	0.00531296
1.60107	-0.370999	0.0239508			1.60173	0.48348	0.0062197		1.60086	-0.112429	0.0147916		1.60118	0.213315	0.00973963		1.59926	-0.09735	0.00531836
1.6019	-0.370305	0.0240062			1.60256	0.483161	0.00621488		1.60169	-0.111323	0.0148734		1.60201	0.214307	0.00975465		1.60009	-0.095675	0.0053466
1.60274	-0.36995	0.0240345			1.60339	0.482647	0.00620712		1.60252	-0.110001	0.0149711		1.60284	0.215231	0.00976863		1.60092	-0.094317	0.0053695
1.60357	-0.369448	0.0240746			1.60422	0.482716	0.00620816		1.60335	-0.110173	0.0149584		1.60367	0.215946	0.00977946		1.60175	-0.09412	0.00537282
1.6044	-0.370094	0.024023			1.60506	0.482684	0.00620768		1.60418	-0.111569	0.0148552		1.60451	0.215191	0.00976803		1.60258	-0.093974	0.00537528
1.60523	-0.369312	0.0240855			1.60589	0.482907	0.00621104		1.60502	-0.111874	0.0148326		1.60534	0.215403	0.00977124		1.60341	-0.093413	0.00538474
1.60607	-0.369675	0.0240565			1.60672	0.482666	0.0062074		1.60585	-0.112099	0.014816		1.60617	0.215514	0.00977292		1.60424	-0.092835	0.00539449
1.6069	-0.36936	0.0240816			1.60755	0.481892	0.00619572		1.60668	-0.112655	0.0147749		1.607	0.216614	0.00978957		1.60508	-0.092896	0.00539346
1.60773	-0.369504	0.0240701			1.60839	0.481488	0.00618962		1.60751	-0.112444	0.0147905		1.60783	0.216463	0.00978728		1.60591	-0.09231	0.00540334
1.60856	-0.370848	0.0239628			1.60922	0.482233	0.00620087		1.60835	-0.111323	0.0148734		1.60867	0.217432	0.00980195		1.60674	-0.091379	0.00541904
1.60939	-0.3712	0.0239347			1.61005	0.482919	0.00621122		1.60918	-0.110064	0.0149665		1.6095	0.21772	0.00980631		1.60757	-0.091284	0.00542064
1.61023	-0.369013	0.0241093			1.61088	0.483693	0.00622291		1.61001	-0.109988	0.0149721		1.61033	0.218792	0.00982254		1.6084	-0.09105	0.00542459
1.61106	-0.369102	0.0241022			1.61172	0.484076	0.00622869		1.61084	-0.109822	0.0149844		1.61116	0.218417	0.00981686		1.60923	-0.089663	0.00544797
1.61189	-0.370119	0.024021			1.61255	0.483271	0.00621654		1.61167	-0.108828	0.0150578		1.612	0.219642	0.00983541		1.61006	-0.089296	0.00545416
1.61272	-0.369593	0.024063			1.61338	0.482912	0.00621112		1.61251	-0.107793	0.0151344		1.61283	0.220867	0.00985395		1.61089	-0.089828	0.00544519
1.61356	-0.370298	0.0240067			1.61421	0.483554	0.00622081		1.61334	-0.107574	0.0151506		1.61366	0.220161	0.00984327		1.61173	-0.090961	0.00542609
1.61439	-0.369741	0.0240512			1.61505	0.483845	0.00622521		1.61417	-0.107817	0.0151326		1.61449	0.220041	0.00984145		1.61256	-0.09237	0.00540233
1.61522	-0.369968	0.0240331			1.61588	0.48377	0.00622407		1.615	-0.109895	0.014979		1.61532	0.219174	0.00982832		1.61339	-0.092081	0.0054072
1.61605	-0.370813	0.0239656			1.61671	0.483434	0.006219		1.61583	-0.112048	0.0148198		1.61616	0.219361	0.00983116		1.61422	-0.091587	0.00541553
1.61688	-0.370078	0.0240243			1.61754	0.483309	0.00621711		1.61667	-0.112129	0.0148138		1.61699	0.220643	0.00985056		1.61505	-0.091491	0.00541715
1.61772	-0.368906	0.0241179			1.61838	0.484046	0.00622824		1.6175	-0.11161	0.0148521		1.61782	0.220363	0.00984632		1.61588	-0.09117	0.00542256
1.61855	-0.368932	0.0241158			1.61921	0.483026	0.00621284		1.61833	-0.111427	0.0148657		1.61865	0.22124	0.0098596		1.61671	-0.091506	0.0054169
1.61938	-0.370461	0.0239937			1.62004	0.482557	0.00620576		1.61916	-0.111883	0.014832		1.61949	0.222258	0.00987501		1.61755	-0.091814	0.00541171
1.62021	-0.370638	0.0239796			1.62087	0.482858	0.0062103		1.61999	-0.112052	0.0148195		1.62032	0.222986	0.00988603		1.61838	-0.091787	0.00541216
1.62104	-0.371117	0.0239414			1.62171	0.483026	0.00621284		1.62083	-0.11135	0.0148714		1.62115	0.22505	0.00991728		1.61921	-0.091675	0.00541405
1.62188	-0.372839	0.0238039			1.62254	0.482687	0.00620772		1.62166	-0.110893	0.0149052		1.62198	0.22443	0.00990789		1.62004	-0.092001	0.00540855
1.62271	-0.372895	0.0237994			1.62337	0.482346	0.00620257		1.62249	-0.111175	0.0148843		1.62281	0.224485	0.00990873		1.62087	-0.09322	0.005388
1.62354	-0.373404	0.0237588			1.6242	0.482872	0.00621052		1.62332	-0.111738	0.0148427		1.62365	0.224	0.00990138		1.6217	-0.094431	0.00536758
1.62437	-0.373351	0.023763			1.62504	0.482463	0.00620434		1.62416	-0.111805	0.0148377		1.62448	0.223026	0.00988664		1.62253	-0.095485	0.00534981
1.62521	-0.373358	0.0237625			1.62587	0.482746	0.00620861		1.62499	-0.111488	0.0148612		1.62531	0.224958	0.00991589		1.62336	-0.096017	0.00534084
1.62604	-0.373703	0.0237349			1.6267	0.484335	0.00623261		1.62582	-0.111288	0.014876		1.62614	0.225341	0.00992168		1.6242	-0.096346	0.00533529
1.62687	-0.372466	0.0238337			1.62753	0.485165	0.00624514		1.62665	-0.110797	0.0149123		1.62698	0.22633	0.00993666		1.62503	-0.09664	0.00533033
1.6277	-0.371684	0.0238961			1.62837	0.485642	0.00625234		1.62748	-0.111009	0.0148966		1.62781	0.226189	0.00993452		1.62586	-0.095938	0.00534217
1.62853	-0.370906	0.0239582			1.6292	0.486038	0.00625832		1.62831	-0.112422	0.0147921		1.62864	0.226671	0.00994182		1.62669	-0.095196	0.00535468
1.62937	-0.370323	0.0240048			1.63003	0.485652	0.00625249		1.62915	-0.11407	0.0146703		1.62947	0.226	0.00993166		1.62752	-0.095487	0.00534977
1.6302	-0.370357	0.024002			1.63086	0.484986	0.00624243		1.62998	-0.115149	0.0145905		1.6303	0.22656	0.00994014		1.62835	-0.097016	0.00532399
1.63103	-0.372906	0.0237986			1.6317	0.484218	0.00623084		1.63081	-0.11542	0.0145704		1.63114	0.22554	0.0099247		1.62918	-0.098429	0.00530017
1.63186	-0.372398	0.0238391			1.63253	0.48323	0.00621592		1.63164	-0.116033	0.0145251		1.63197	0.225428	0.009923		1.63001	-0.099841	0.00527636
1.63269	-0.371544	0.0239073			1.63336	0.482684	0.00620768		1.63247	-0.116822	0.0144668		1.6328	0.22378	0.00989805		1.63084	-0.101545	0.00524763
1.63353	-0.371928	0.0238766			1.63419	0.482675	0.00620754		1.63331	-0.117274	0.0144334		1.63363	0.22182	0.00986838		1.63167	-0.102101	0.00523825
1.63436	-0.370477	0.0239925			1.63503	0.48267	0.00620747		1.63414	-0.11748	0.0144181		1.63447	0.22177	0.00986762		1.63251	-0.10173	0.00524451
1.63519	-0.371595	0.0239032			1.63586	0.482931	0.00621141		1.63497	-0.116185	0.0145139		1.6353	0.221051	0.00985674		1.63334	-0.101414	0.00524984
1.63602	-0.371638	0.0238998			1.63669	0.483339	0.00621757		1.6358	-0.114381	0.0146473		1.63613	0.222029	0.00987154		1.63417	-0.10286	0.00522545
1.63685	-0.371916	0.0238776			1.63752	0.484228	0.00623099		1.63664	-0.11376	0.0146932		1.63696	0.222386	0.00987695		1.635	-0.105108	0.00518755
1.63769	-0.372234	0.0238522			1.63836	0.484049	0.00622829		1.63747	-0.114406	0.0146454		1.63779	0.219773	0.00983739		1.63583	-0.104751	0.00519357
1.63852	-0.372459	0.0238342			1.63919	0.48299	0.0062123		1.6383	-0.115304	0.014579		1.63863	0.218664	0.0098206		1.63666	-0.105148	0.00518687
1.63935	-0.37343	0.0237567			1.64002	0.482469	0.00620443		1.63913	-0.115535	0.0145619		1.63946	0.218275	0.00981471		1.63749	-0.106107	0.0051707
1.64018	-0.372889	0.0237999			1.64085	0.481894	0.00619575		1.63996	-0.115367	0.0145744		1.64029	0.217584	0.00980425		1.63833	-0.106789	0.0051592
1.64102	-0.372624	0.0238211			1.64169	0.481677	0.00619247		1.6408	-0.115365	0.0145745		1.64112	0.216413	0.00978653		1.63916	-0.10709	0.00515413
1.64185	-0.372245	0.0238513			1.64252	0.481975	0.00619697		1.64163	-0.11461	0.0146303		1.64196	0.215598	0.00977419		1.63999	-0.107477	0.0051476
1.64268	-0.372754	0.0238107			1.64335	0.482806	0.00620952		1.64246	-0.114858	0.014612		1.64279	0.215743	0.00977638		1.64082	-0.107873	0.00514093
1.64351	-0.373451	0.0237551			1.64418	0.483147	0.00621467		1.64329	-0.115614	0.0145561		1.64362	0.215124	0.00976701		1.64165	-0.108725	0.00512656
1.64434	-0.373226	0.023773			1.64502	0.482906	0.00621103		1.64412	-0.115793	0.0145429		1.64445	0.215964	0.00977973		1.64248	-0.109698	0.00511015
1.64518	-0.372792	0.0238077			1.64585	0.483609	0.00622164		1.64496	-0.115884	0.0145361		1.64529	0.216945	0.00979458		1.64331	-0.109734	0.00510955
1.64601	-0.372233	0.0238523			1.64668	0.483519	0.00622028		1.64579	-0.116178	0.0145144		1.64612	0.216083	0.00978153		1.64414	-0.109928	0.00510628
1.64684	-0.372886	0.0238002			1.64751	0.481919	0.00619613		1.64662	-0.116133	0.0145177		1.64695	0.215017	0.00976539		1.64498	-0.110348	0.0050992
1.64767	-0.374197	0.0236955			1.64835	0.481077	0.00618341		1.64745	-0.11697	0.0144558		1.64778	0.215292	0.00976956		1.64581	-0.109999	0.00510508
1.64851	-0.376043	0.0235481			1.64918	0.480549	0.00617544		1.64828	-0.117406	0.0144236		1.64861	0.214646	0.00975978		1.64664	-0.11082	0.00509124
1.64934	-0.377203	0.0234555			1.65001	0.48041	0.00617334		1.64912	-0.116734	0.0144733		1.64945	0.213914	0.0097487		1.64747	-0.111785	0.00507497
1.65017	-0.377334	0.0234451			1.65084	0.480087	0.00616846		1.64995	-0.115999	0.0145276		1.65028	0.213817	0.00974723		1.6483	-0.111906	0.00507292
1.651	-0.377322	0.023446			1.65168	0.479435	0.00615862		1.65078	-0.116394	0.0144984		1.65111	0.213538	0.009743		1.64913	-0.111323	0.00508276
1.65183	-0.377202	0.0234556			1.65251	0.479723	0.00616297		1.65161	-0.117218	0.0144375		1.65194	0.212866	0.00973283		1.64996	-0.111419	0.00508114
1.65267	-0.37748	0.0234334			1.65334	0.480557	0.00617556		1.65244	-0.117042	0.0144505		1.65278	0.213155	0.00973721		1.65079	-0.111894	0.00507313
1.6535	-0.377398	0.02344			1.65417	0.481567	0.00619081		1.65328	-0.116333	0.0145029		1.65361	0.213611	0.00974411		1.65162	-0.111706	0.0050763
1.65433	-0.378058	0.0233873			1.65501	0.481079	0.00618344		1.65411	-0.116129	0.014518		1.65444	0.215002	0.00976517		1.65246	-0.111266	0.00508372
1.65516	-0.379759	0.0232515			1.65584	0.480009	0.00616729		1.65494	-0.116684	0.014477		1.65527	0.215292	0.00976956		1.65329	-0.1113	0.00508314
1.656	-0.379705	0.0232558			1.65667	0.478667	0.00614702		1.65577	-0.117883	0.0143883		1.6561	0.215574	0.00977383		1.65412	-0.111315	0.00508289
1.65683	-0.37994	0.0232371			1.6575	0.477147	0.00612407		1.6566	-0.118708	0.0143273		1.65694	0.214597	0.00975904		1.65495	-0.110581	0.00509527
1.65766	-0.379916	0.023239			1.65834	0.476214	0.00610999		1.65744	-0.118651	0.0143315		1.65777	0.214327	0.00975495		1.65578	-0.109864	0.00510736
1.65849	-0.380063	0.0232272			1.65917	0.476594	0.00611572		1.65827	-0.118899	0.0143132		1.6586	0.215198	0.00976813		1.65661	-0.11032	0.00509967
1.65932	-0.380903	0.0231602			1.66	0.477141	0.00612398		1.6591	-0.11876	0.0143235		1.65943	0.216515	0.00978807		1.65744	-0.109788	0.00510864
1.66016	-0.380321	0.0232066			1.66083	0.477464	0.00612886		1.65993	-0.119017	0.0143045		1.66027	0.216723	0.00979122		1.65827	-0.109379	0.00511553
1.66099	-0.380886	0.0231615			1.66167	0.478189	0.00613981		1.66077	-0.11918	0.0142924		1.6611	0.217815	0.00980775		1.65911	-0.109609	0.00511166
[truncated: 14,828 more rows]
