# Supplementary material for: Competitive binding of MatP and topoisomerase IV to the MukB hinge domain
Source: eLife. 2021 Sep 29;10:e70444. doi: 10.7554/eLife.70444 (PMC8523169; doi:10.7554/eLife.70444)
Supplement: Figure 3—figure supplement 1—source data 1. [file elife-70444-fig3-figsupp1-data1.xlsx]

## Sheet: Supplementary Figure 3-source d
X axis	Fitted data			Raw data
1.8e-05	1.6597	1.6419	1.6441	1.6563	1.6714	1.6931
1.84e-05	1.6597	1.7201	1.6441	1.6816	1.6714	1.7154
1.88e-05	1.6597	1.6575	1.6441	1.669	1.6714	1.7377
1.92e-05	1.6597	1.6732	1.6441	1.6563	1.6714	1.6708
1.96e-05	1.6597	1.6262	1.6441	1.6563	1.6714	1.76
2e-05	1.6597	1.6419	1.6441	1.669	1.6714	1.6374
2.04e-05	1.6597	1.595	1.6441	1.6816	1.6714	1.7711
2.08e-05	1.6597	1.6732	1.6441	1.6563	1.6714	1.6597
2.12e-05	1.6597	1.6888	1.6315	1.6563	1.6714	1.7265
2.16e-05	1.6597	1.6888	1.6315	1.6437	1.6714	1.6597
2.2e-05	1.6597	1.6419	1.6315	1.6437	1.6714	1.682
2.24e-05	1.6597	1.7044	1.6315	1.6437	1.6714	1.6708
2.28e-05	1.6597	1.6888	1.6315	1.631	1.6714	1.7377
2.32e-05	1.6597	1.7044	1.6315	1.6437	1.6714	1.6708
2.36e-05	1.6597	1.6888	1.6315	1.6563	1.6714	1.7265
2.4e-05	1.6597	1.6262	1.6315	1.631	1.6714	1.682
2.44e-05	1.6597	1.7201	1.6315	1.6437	1.6714	1.6374
2.48e-05	1.6597	1.6575	1.6315	1.6563	1.6714	1.7043
2.52e-05	1.6597	1.6419	1.6315	1.6184	1.6714	1.682
2.56e-05	1.6597	1.6575	1.6315	1.6563	1.6714	1.7265
2.64e-05	1.6597	1.6419	1.6315	1.6437	1.6714	1.7154
2.72e-05	1.6597	1.6262	1.6315	1.6437	1.6714	1.6708
2.8e-05	1.6597	1.6419	1.6315	1.6563	1.6714	1.682
2.88e-05	1.6597	1.6732	1.6315	1.6437	1.6602	1.6708
2.96e-05	1.644	1.6419	1.6315	1.6437	1.6602	1.6931
3.04e-05	1.644	1.6262	1.6315	1.631	1.6602	1.6263
3.12e-05	1.644	1.6262	1.6315	1.6563	1.6602	1.682
3.2e-05	1.644	1.6419	1.6315	1.631	1.6602	1.6708
3.28e-05	1.644	1.6262	1.6315	1.631	1.6602	1.6597
3.36e-05	1.644	1.6419	1.6315	1.631	1.6602	1.7043
3.44e-05	1.644	1.6106	1.6315	1.6563	1.6602	1.6374
3.52e-05	1.644	1.5793	1.6315	1.6437	1.6602	1.6486
3.6e-05	1.644	1.6888	1.6315	1.6437	1.6602	1.7265
3.68e-05	1.644	1.6262	1.6315	1.6437	1.6602	1.7377
3.76e-05	1.644	1.6575	1.6188	1.631	1.6602	1.7043
3.84e-05	1.644	1.6106	1.6188	1.631	1.6602	1.6486
3.92e-05	1.644	1.6732	1.6188	1.631	1.6602	1.6708
4e-05	1.644	1.6419	1.6188	1.6437	1.6602	1.7154
4.08e-05	1.644	1.6262	1.6188	1.6437	1.6602	1.7377
4.16e-05	1.644	1.6106	1.6188	1.6184	1.6602	1.6708
4.24e-05	1.644	1.6106	1.6188	1.631	1.6602	1.682
4.32e-05	1.644	1.6732	1.6188	1.6184	1.6602	1.7043
4.4e-05	1.644	1.6732	1.6188	1.6437	1.6602	1.6931
4.48e-05	1.644	1.6106	1.6188	1.6057	1.6602	1.6486
4.56e-05	1.644	1.6419	1.6188	1.631	1.6602	1.6374
4.64e-05	1.644	1.6575	1.6188	1.6184	1.6602	1.6374
4.72e-05	1.644	1.6262	1.6188	1.631	1.6602	1.6708
4.8e-05	1.644	1.5793	1.6188	1.631	1.6602	1.682
4.88e-05	1.644	1.6575	1.6188	1.631	1.6602	1.6597
4.96e-05	1.644	1.6419	1.6188	1.631	1.6602	1.6263
5.04e-05	1.6284	1.6575	1.6188	1.631	1.6602	1.6597
5.12e-05	1.6284	1.595	1.6188	1.6184	1.6602	1.6597
5.28e-05	1.6284	1.6262	1.6188	1.6184	1.6602	1.6597
5.44e-05	1.6284	1.595	1.6062	1.6057	1.6602	1.6931
5.6e-05	1.6284	1.6419	1.6062	1.6437	1.6602	1.6708
5.76e-05	1.6284	1.6262	1.6062	1.6184	1.6602	1.6486
5.92e-05	1.6284	1.6262	1.6062	1.6057	1.6602	1.6486
6.08e-05	1.6284	1.6262	1.6062	1.6057	1.6491	1.6486
6.24e-05	1.6284	1.6262	1.6062	1.6057	1.6491	1.6931
6.4e-05	1.6284	1.6575	1.6062	1.6184	1.6491	1.6263
6.56e-05	1.6284	1.595	1.6062	1.6057	1.6491	1.6374
6.72e-05	1.6284	1.6106	1.6062	1.6057	1.6491	1.6931
6.88e-05	1.6284	1.6106	1.6062	1.5931	1.6491	1.6263
7.04e-05	1.6284	1.6106	1.5935	1.5931	1.6491	1.6597
7.2e-05	1.6284	1.6262	1.5935	1.5931	1.6491	1.6374
7.36e-05	1.6127	1.6106	1.5935	1.5931	1.6491	1.6708
7.52e-05	1.6127	1.6419	1.5935	1.5804	1.6491	1.6374
7.68e-05	1.6127	1.595	1.5935	1.5931	1.6491	1.6374
7.84e-05	1.6127	1.6106	1.5935	1.5931	1.6491	1.6374
8e-05	1.6127	1.6106	1.5935	1.5804	1.6491	1.6708
8.16e-05	1.6127	1.5793	1.5935	1.5931	1.6491	1.6708
8.32e-05	1.6127	1.6262	1.5935	1.5804	1.6491	1.6486
8.48e-05	1.6127	1.595	1.5935	1.5804	1.6491	1.6374
8.64e-05	1.6127	1.6262	1.5935	1.5804	1.6491	1.6263
8.8e-05	1.6127	1.595	1.5809	1.5678	1.6491	1.682
8.96e-05	1.6127	1.595	1.5809	1.5804	1.6491	1.6597
9.12e-05	1.6127	1.6262	1.5809	1.5804	1.6491	1.6597
9.28e-05	1.6127	1.6106	1.5809	1.5804	1.6491	1.6597
9.44e-05	1.6127	1.6106	1.5809	1.5804	1.6379	1.604
9.6e-05	1.6127	1.5793	1.5809	1.5804	1.6379	1.6708
9.76e-05	1.5971	1.6106	1.5809	1.5678	1.6379	1.6708
9.92e-05	1.5971	1.595	1.5809	1.5678	1.6379	1.6151
0.000101	1.5971	1.595	1.5809	1.5678	1.6379	1.6597
0.000102	1.5971	1.6106	1.5809	1.5678	1.6379	1.6486
0.000106	1.5971	1.6106	1.5682	1.5678	1.6379	1.6597
0.000109	1.5971	1.595	1.5682	1.5552	1.6379	1.6374
0.000112	1.5971	1.6106	1.5682	1.5552	1.6379	1.6486
0.000115	1.5971	1.595	1.5682	1.5552	1.6379	1.6374
0.000118	1.5971	1.5793	1.5682	1.5552	1.6379	1.6263
0.000122	1.5971	1.5793	1.5682	1.5425	1.6379	1.6263
0.000125	1.5814	1.595	1.5556	1.5552	1.6379	1.6151
0.000128	1.5814	1.5793	1.5556	1.5425	1.6268	1.604
0.000131	1.5814	1.5793	1.5556	1.5425	1.6268	1.6708
0.000134	1.5814	1.595	1.5556	1.5425	1.6268	1.6374
0.000138	1.5814	1.5793	1.5556	1.5425	1.6268	1.5929
0.000141	1.5814	1.5793	1.5429	1.5425	1.6268	1.604
0.000144	1.5814	1.5793	1.5429	1.5299	1.6268	1.6151
0.000147	1.5814	1.5527	1.5429	1.5299	1.6268	1.6151
0.00015	1.5814	1.595	1.5429	1.5299	1.6268	1.6263
0.000154	1.5657	1.5793	1.5429	1.5299	1.6268	1.604
0.000157	1.5657	1.5637	1.5429	1.5172	1.6268	1.6374
0.00016	1.5657	1.5527	1.5303	1.5299	1.6157	1.6151
0.000163	1.5657	1.5637	1.5303	1.5299	1.6157	1.5706
0.000166	1.5657	1.5637	1.5303	1.5172	1.6157	1.604
0.00017	1.5642	1.5793	1.5303	1.5172	1.6157	1.6374
0.000173	1.5626	1.5355	1.5303	1.5172	1.6157	1.604
0.000176	1.561	1.5527	1.5303	1.5046	1.6157	1.5706
0.000179	1.5595	1.5371	1.5176	1.5046	1.6157	1.604
0.000182	1.5579	1.5606	1.5176	1.5046	1.6157	1.6263
0.000186	1.5563	1.5465	1.5176	1.5046	1.6157	1.5929
0.000189	1.5548	1.5543	1.5176	1.5046	1.6157	1.5929
0.000192	1.5532	1.5621	1.5176	1.5046	1.6157	1.5929
0.000195	1.5516	1.5402	1.5176	1.5046	1.6045	1.5817
0.000198	1.5501	1.5543	1.505	1.4919	1.6045	1.5929
0.000202	1.5485	1.5418	1.505	1.4919	1.6045	1.6374
0.000205	1.547	1.5793	1.505	1.5046	1.6045	1.604
0.000211	1.5454	1.5449	1.505	1.4919	1.6045	1.5817
0.000218	1.5423	1.5434	1.4923	1.4919	1.6045	1.604
0.000224	1.5391	1.5465	1.4923	1.4919	1.6045	1.5929
0.00023	1.536	1.5496	1.4923	1.4793	1.5934	1.5817
0.000237	1.5329	1.5387	1.4797	1.4667	1.5934	1.5706
0.000243	1.5313	1.534	1.4797	1.4667	1.5934	1.5929
0.00025	1.5282	1.5168	1.4797	1.4667	1.5934	1.5706
0.000256	1.525	1.534	1.4797	1.4667	1.5934	1.5817
0.000262	1.5235	1.5324	1.4671	1.454	1.5822	1.5817
0.000269	1.5203	1.5215	1.4671	1.454	1.5822	1.5706
0.000275	1.5172	1.509	1.4671	1.4414	1.5822	1.5595
0.000282	1.5156	1.5043	1.4544	1.4414	1.5822	1.5706
0.000288	1.5125	1.5183	1.4544	1.4414	1.5822	1.5706
0.000294	1.5109	1.5058	1.4544	1.4287	1.5822	1.5706
0.000301	1.5078	1.5105	1.4418	1.4287	1.5711	1.5595
0.000307	1.5062	1.5152	1.4418	1.4287	1.5711	1.5595
0.000314	1.5031	1.5011	1.4418	1.4287	1.5711	1.5483
0.00032	1.5015	1.4824	1.4418	1.4287	1.5711	1.5706
0.000326	1.4984	1.5043	1.4291	1.4161	1.5711	1.5595
0.000333	1.4968	1.4886	1.4291	1.4161	1.5599	1.5483
0.000339	1.4937	1.4855	1.4291	1.4161	1.5599	1.5372
0.000346	1.4922	1.5011	1.4165	1.4034	1.5599	1.5706
0.000352	1.489	1.4839	1.4165	1.4034	1.5599	1.5706
0.000358	1.4875	1.4871	1.4165	1.4034	1.5599	1.5372
0.000365	1.4859	1.5027	1.4165	1.4034	1.5599	1.5372
0.000371	1.4828	1.4714	1.4038	1.3908	1.5488	1.5372
0.000378	1.4812	1.4793	1.4038	1.3908	1.5488	1.526
0.000384	1.4796	1.4902	1.4038	1.3908	1.5488	1.5372
0.00039	1.4765	1.4761	1.3912	1.3908	1.5488	1.526
0.000397	1.4749	1.4605	1.3912	1.3908	1.5488	1.5149
0.000403	1.4734	1.4636	1.3912	1.3781	1.5488	1.5149
0.00041	1.4718	1.4683	1.3912	1.3781	1.5377	1.5149
0.000422	1.4671	1.4621	1.3785	1.3781	1.5377	1.5149
0.000435	1.464	1.4667	1.3785	1.3655	1.5377	1.5038
0.000448	1.4593	1.4558	1.3659	1.3529	1.5265	1.526
0.000461	1.4561	1.4714	1.3659	1.3529	1.5265	1.5149
0.000474	1.453	1.4652	1.3532	1.3529	1.5265	1.5149
0.000486	1.4483	1.4449	1.3532	1.3402	1.5154	1.5038
0.000499	1.4452	1.4527	1.3406	1.3276	1.5154	1.5038
0.000512	1.442	1.4402	1.3406	1.3276	1.5154	1.4815
0.000525	1.4389	1.4323	1.3279	1.3276	1.5042	1.4926
0.000538	1.4342	1.4323	1.3279	1.3149	1.5042	1.4815
0.00055	1.4311	1.4245	1.3153	1.3149	1.5042	1.4592
0.000563	1.428	1.4292	1.3153	1.3023	1.4931	1.4815
0.000576	1.4248	1.4105	1.3026	1.3023	1.4931	1.4592
0.000589	1.4217	1.4089	1.3026	1.3023	1.4931	1.4815
0.000602	1.4186	1.4151	1.29	1.2896	1.4819	1.4592
0.000614	1.4154	1.4183	1.29	1.2896	1.4819	1.4703
0.000627	1.4123	1.4105	1.2773	1.277	1.4819	1.4481
0.00064	1.4092	1.4167	1.2773	1.277	1.4708	1.4592
0.000653	1.406	1.3964	1.2773	1.277	1.4708	1.4592
0.000666	1.4029	1.4105	1.2647	1.2644	1.4708	1.4481
0.000678	1.3998	1.3995	1.2622	1.2606	1.4708	1.4481
0.000691	1.3982	1.3932	1.2558	1.2542	1.4597	1.4481
0.000704	1.3951	1.3964	1.2508	1.253	1.4597	1.4258
0.000717	1.3919	1.3854	1.2457	1.2454	1.4597	1.4369
0.00073	1.3888	1.3901	1.2407	1.2441	1.4485	1.4258
0.000742	1.3857	1.3745	1.2369	1.2315	1.4485	1.4258
0.000755	1.3825	1.3932	1.2318	1.234	1.4485	1.4258
0.000768	1.381	1.3807	1.2268	1.229	1.4374	1.4258
0.000781	1.3779	1.3729	1.2217	1.229	1.4374	1.4146
0.000794	1.3747	1.3776	1.2166	1.2226	1.4374	1.4369
0.000806	1.3732	1.3682	1.2128	1.2138	1.4374	1.4035
0.000819	1.37	1.3667	1.2078	1.215	1.4262	1.4146
0.000845	1.3638	1.3714	1.1989	1.2062	1.4262	1.4146
0.00087	1.3591	1.3557	1.1901	1.1961	1.4151	1.4035
0.000896	1.3544	1.3588	1.1812	1.1872	1.4151	1.4035
0.000922	1.3497	1.3463	1.1724	1.1796	1.404	1.3812
0.000947	1.3434	1.337	1.1635	1.1708	1.3928	1.3812
0.000973	1.3387	1.3307	1.1559	1.1657	1.3928	1.3701
0.000998	1.334	1.326	1.1483	1.1569	1.3817	1.3701
0.00102	1.3293	1.3307	1.1395	1.1493	1.3817	1.3701
0.00105	1.3246	1.3119	1.1319	1.1417	1.3705	1.359
0.00108	1.3199	1.3072	1.1243	1.1354	1.3705	1.359
0.0011	1.3152	1.3072	1.1167	1.1278	1.3594	1.3478
0.00113	1.3105	1.3072	1.1104	1.119	1.3594	1.3367
0.00115	1.3058	1.2947	1.1028	1.1126	1.3482	1.3478
0.00118	1.3027	1.2947	1.0965	1.105	1.3482	1.3367
0.0012	1.298	1.2916	1.0889	1.1	1.3371	1.3367
0.00123	1.2933	1.2854	1.0826	1.0924	1.3371	1.3255
0.00125	1.2886	1.2869	1.0763	1.0873	1.326	1.3144
0.00128	1.2855	1.2807	1.0687	1.0798	1.326	1.3033
0.00131	1.2808	1.2728	1.0624	1.0722	1.3148	1.3033
0.00133	1.2761	1.276	1.056	1.0671	1.3148	1.3033
0.00136	1.2729	1.265	1.051	1.0608	1.3037	1.2921
0.00138	1.2682	1.2713	1.0446	1.0545	1.3037	1.2921
0.00141	1.2636	1.2588	1.0383	1.0519	1.2925	1.2921
0.00143	1.2604	1.2463	1.032	1.0431	1.2925	1.2921
0.00146	1.2557	1.2556	1.0269	1.0406	1.2814	1.281
0.00148	1.2526	1.251	1.0206	1.0317	1.2814	1.2698
0.00151	1.2479	1.2353	1.0156	1.0254	1.2702	1.2698
0.00154	1.2448	1.24	1.0105	1.0203	1.2702	1.2476
0.00156	1.2401	1.2306	1.0042	1.0127	1.2702	1.2698
0.00159	1.2369	1.2228	0.99912	1.0115	1.2591	1.2698
0.00161	1.2338	1.2228	0.99406	1.0026	1.2591	1.2476
0.00164	1.2291	1.2228	0.989	1.0001	1.248	1.2476
0.00169	1.2213	1.2166	0.97888	0.98746	1.2368	1.2364
0.00174	1.215	1.2056	0.96876	0.97861	1.2368	1.2253
0.00179	1.2072	1.2009	0.95991	0.97103	1.2257	1.2141
0.00184	1.2009	1.1962	0.95106	0.96091	1.2145	1.2141
0.00189	1.1931	1.1915	0.9422	0.95206	1.2034	1.203
0.00195	1.1868	1.1837	0.93335	0.94195	1.2034	1.203
0.002	1.1806	1.1806	0.9245	0.93562	1.1922	1.1919
0.00205	1.1743	1.1681	0.91564	0.92551	1.1811	1.1807
0.0021	1.168	1.1634	0.90806	0.91539	1.17	1.1807
0.00215	1.1618	1.1618	0.90047	0.90781	1.17	1.1696
0.0022	1.1555	1.1462	0.89288	0.90022	1.1588	1.1585
0.00225	1.1493	1.1446	0.88529	0.89264	1.1477	1.1585
0.0023	1.143	1.1415	0.8777	0.88379	1.1477	1.1473
0.00236	1.1367	1.1399	0.87012	0.87746	1.1365	1.1473
0.00241	1.132	1.129	0.86379	0.86988	1.1254	1.1473
0.00246	1.1258	1.1274	0.8562	0.86356	1.1254	1.1362
0.00251	1.1195	1.1196	0.84988	0.85597	1.1142	1.125
0.00256	1.1148	1.1133	0.84356	0.84838	1.1076	1.1139
0.00261	1.1085	1.1071	0.83723	0.84333	1.1009	1.1139
0.00266	1.1038	1.0993	0.83091	0.837	1.0942	1.0983
0.00271	1.0976	1.0977	0.82459	0.82942	1.0875	1.1005
0.00276	1.0929	1.093	0.81826	0.8231	1.0808	1.0938
0.00282	1.0882	1.0868	0.81194	0.81677	1.0752	1.0816
0.00287	1.0819	1.0852	0.80688	0.80919	1.0686	1.086
0.00292	1.0772	1.0805	0.80056	0.80413	1.0619	1.0705
0.00297	1.0725	1.0696	0.7955	0.79654	1.0563	1.0693
0.00302	1.0678	1.0696	0.78917	0.78896	1.0507	1.0682
0.00307	1.0631	1.0649	0.78412	0.7839	1.0452	1.0537
0.00312	1.0584	1.0571	0.77906	0.77884	1.0396	1.056
0.00317	1.0537	1.0602	0.77273	0.77379	1.0329	1.0504
0.00323	1.049	1.0492	0.76767	0.76746	1.0284	1.0459
0.00328	1.0443	1.0399	0.76262	0.76241	1.0229	1.0359
0.00338	1.035	1.0399	0.7525	0.74976	1.0117	1.0259
0.00348	1.0271	1.0289	0.74365	0.74091	1.0017	1.0136
0.00358	1.0177	1.0258	0.73353	0.7308	0.99168	1.0103
0.00369	1.0099	1.0164	0.72467	0.72068	0.98165	0.99471
0.00379	1.0021	1.0055	0.71582	0.71057	0.97274	0.98803
0.00389	0.99424	1.0008	0.70697	0.70298	0.96382	0.98023
0.00399	0.98642	0.99607	0.69812	0.69287	0.95491	0.9702
0.0041	0.97859	0.98356	0.69053	0.68402	0.946	0.96575
0.0042	0.97076	0.97731	0.68167	0.67264	0.93708	0.95795
0.0043	0.9645	0.97105	0.67409	0.66632	0.92928	0.94681
0.0044	0.95667	0.96011	0.6665	0.65747	0.92148	0.9379
0.00451	0.9504	0.95385	0.65891	0.65241	0.91368	0.93456
0.00461	0.94258	0.9476	0.65132	0.64103	0.90588	0.92342
0.00471	0.93631	0.93978	0.645	0.63597	0.8992	0.91674
0.00481	0.93005	0.93822	0.63741	0.62965	0.8914	0.91005
0.00492	0.92379	0.9304	0.63109	0.62206	0.88471	0.8978
0.00502	0.91752	0.92571	0.6235	0.61448	0.87803	0.89112
0.00512	0.91126	0.92258	0.61717	0.60816	0.87134	0.88332
0.00522	0.905	0.9132	0.61085	0.60183	0.86466	0.87775
0.00532	0.89873	0.90538	0.60453	0.59551	0.85908	0.87441
0.00543	0.89404	0.896	0.5982	0.59045	0.8524	0.86661
0.00553	0.88777	0.896	0.59315	0.5854	0.84683	0.85881
0.00563	0.88151	0.88818	0.58682	0.57908	0.84014	0.85213
0.00573	0.87681	0.88505	0.5805	0.57275	0.83457	0.83988
0.00584	0.87212	0.87723	0.57544	0.56896	0.829	0.83988
0.00594	0.86585	0.8741	0.56912	0.56137	0.82343	0.82874
0.00604	0.86116	0.86159	0.56406	0.55505	0.81786	0.82762
0.00614	0.85646	0.86003	0.559	0.55126	0.81229	0.82206
0.00625	0.8502	0.85221	0.55394	0.54747	0.80783	0.80757
0.00635	0.8455	0.85065	0.54888	0.53988	0.80226	0.8098
0.00645	0.8408	0.84752	0.54382	0.53609	0.7978	0.80423
0.00655	0.83611	0.8397	0.53876	0.53229	0.79223	0.79866
0.00676	0.82671	0.83032	0.52865	0.52091	0.78332	0.78752
0.00696	0.81732	0.82094	0.51853	0.5108	0.77329	0.78196
0.00717	0.80949	0.81156	0.50968	0.50321	0.76437	0.77193
0.00737	0.80009	0.8053	0.50082	0.49436	0.75657	0.76302
0.00758	0.79226	0.79592	0.49323	0.48678	0.74766	0.75188
0.00778	0.78444	0.78497	0.48438	0.47793	0.73986	0.74074
0.00799	0.77661	0.77559	0.47679	0.4716	0.73206	0.73517
0.00819	0.76878	0.77403	0.4692	0.46275	0.72426	0.72626
0.0084	0.76095	0.76152	0.46162	0.45517	0.71646	0.72069
0.0086	0.75469	0.75526	0.45403	0.44885	0.70977	0.71512
0.00881	0.74686	0.74901	0.44644	0.44252	0.70309	0.70621
0.00901	0.7406	0.74432	0.44012	0.4362	0.6964	0.70175
0.00922	0.73433	0.74119	0.43379	0.42988	0.68972	0.69284
0.00942	0.72807	0.73337	0.42747	0.42356	0.68303	0.68616
0.00963	0.72181	0.72243	0.42115	0.41597	0.67635	0.68282
0.00983	0.71554	0.71617	0.41482	0.40965	0.67078	0.67391
0.01	0.70928	0.71148	0.4085	0.40333	0.66409	0.66388
0.0102	0.70302	0.70523	0.40344	0.39827	0.65852	0.65831
0.0104	0.69675	0.69897	0.39712	0.39195	0.65295	0.6494
0.0106	0.69206	0.69428	0.39206	0.38563	0.64738	0.64829
0.0109	0.68579	0.69115	0.387	0.38057	0.64181	0.63715
0.0111	0.6811	0.68177	0.38194	0.37678	0.63623	0.63158
0.0113	0.67483	0.67708	0.37688	0.37046	0.63066	0.62824
0.0115	0.67014	0.6677	0.37182	0.3654	0.62509	0.61821
0.0117	0.66544	0.66457	0.36676	0.36161	0.62064	0.61487
0.0119	0.65918	0.65831	0.3617	0.35655	0.61506	0.6093
0.0121	0.65448	0.64737	0.35791	0.35149	0.61061	0.60039
0.0123	0.64978	0.64737	0.35285	0.3477	0.60504	0.59928
0.0125	0.64508	0.63955	0.34906	0.3439	0.60058	0.59259
0.0127	0.64039	0.63642	0.344	0.34011	0.59612	0.58925
0.0129	0.63569	0.63173	0.3402	0.33505	0.59166	0.5848
0.0131	0.63099	0.62548	0.33641	0.33126	0.58609	0.58145
0.0135	0.62316	0.61609	0.32756	0.32368	0.57718	0.57254
0.0139	0.61377	0.60984	0.32123	0.31609	0.56938	0.56029
0.0143	0.60594	0.60515	0.31365	0.30977	0.56047	0.55472
0.0147	0.59811	0.59577	0.30606	0.30218	0.55267	0.54358
0.0152	0.59028	0.58482	0.29973	0.29586	0.54487	0.53801
0.0156	0.58402	0.577	0.29341	0.28954	0.53707	0.52687
0.016	0.57619	0.57075	0.28709	0.28322	0.52927	0.51908
0.0164	0.56836	0.56449	0.28203	0.27816	0.52258	0.51239
0.0168	0.5621	0.55824	0.27571	0.27437	0.5159	0.5046
0.0172	0.55584	0.54886	0.27065	0.27057	0.50921	0.49791
0.0176	0.54957	0.54416	0.26559	0.26551	0.50253	0.49123
0.018	0.54331	0.53791	0.26053	0.26046	0.49584	0.48454
0.0184	0.53705	0.53478	0.25547	0.25666	0.48915	0.47563
0.0188	0.53079	0.53322	0.25041	0.25287	0.48358	0.47341
0.0193	0.52452	0.52853	0.24535	0.24908	0.4769	0.46672
0.0197	0.51983	0.5254	0.24156	0.24402	0.47133	0.46338
0.0201	0.51356	0.51915	0.23776	0.24023	0.46575	0.45781
0.0205	0.50887	0.51758	0.23271	0.23517	0.46018	0.45224
0.0209	0.50417	0.51445	0.22891	0.23264	0.45461	0.44779
0.0213	0.49791	0.50351	0.22512	0.22885	0.44904	0.4411
0.0217	0.49321	0.49725	0.22132	0.22379	0.44347	0.43331
0.0221	0.48851	0.49256	0.21753	0.22	0.43901	0.42885
0.0225	0.48381	0.48631	0.21373	0.2162	0.43344	0.42328
0.0229	0.47912	0.48631	0.21121	0.21115	0.42898	0.41994
0.0233	0.47442	0.48318	0.20741	0.20862	0.42341	0.41548
0.0238	0.46972	0.48005	0.20488	0.20609	0.41896	0.40991
0.0242	0.46502	0.4738	0.20109	0.20356	0.4145	0.40434
0.0246	0.46189	0.46754	0.19856	0.20103	0.41004	0.39766
0.025	0.4572	0.46285	0.19476	0.19977	0.40559	0.39432
0.0254	0.4525	0.45816	0.19223	0.19598	0.40113	0.39098
0.0258	0.44937	0.45191	0.18971	0.19345	0.39667	0.38429
0.0262	0.44467	0.44565	0.18718	0.19092	0.39333	0.37984
0.027	0.43684	0.43314	0.18085	0.1846	0.38553	0.37093
0.0279	0.42901	0.41907	0.17706	0.17954	0.37773	0.36424
0.0287	0.42275	0.41281	0.172	0.17448	0.36993	0.35533
0.0295	0.41492	0.405	0.16694	0.16942	0.36213	0.34754
0.0303	0.40866	0.39092	0.16315	0.16816	0.35544	0.33862
0.0311	0.4024	0.37685	0.15935	0.16437	0.34876	0.33417
0.0319	0.39613	0.36747	0.15429	0.16057	0.34319	0.32526
0.0328	0.38987	0.36121	0.15176	0.15299	0.3365	0.32192
0.0336	0.38361	0.35809	0.14797	0.14919	0.33093	0.31523
0.0344	0.37891	0.35652	0.14418	0.14667	0.32425	0.30632
0.0352	0.37265	0.35652	0.14038	0.14287	0.31867	0.30075
0.036	0.36795	0.35027	0.13785	0.14034	0.3131	0.2963
0.0369	0.36325	0.35183	0.13532	0.13655	0.30865	0.29407
0.0377	0.35699	0.35027	0.13153	0.13276	0.30307	0.29073
0.0385	0.35229	0.34245	0.129	0.13276	0.29862	0.28627
0.0393	0.34759	0.33619	0.12634	0.13023	0.29305	0.28627
0.0401	0.3429	0.3315	0.12369	0.13023	0.28859	0.2807
0.041	0.3382	0.32681	0.12116	0.1277	0.28413	0.27625
0.0418	0.3335	0.32056	0.11876	0.1229	0.27968	0.27068
0.0426	0.33037	0.3143	0.11648	0.11885	0.27633	0.26622
0.0434	0.32567	0.31117	0.1142	0.1148	0.27188	0.26511
0.0442	0.32098	0.30805	0.11205	0.11417	0.26742	0.25842
0.0451	0.31785	0.30492	0.11003	0.11265	0.26408	0.2562
0.0459	0.31315	0.30336	0.10788	0.1119	0.25962	0.24951
0.0467	0.31002	0.29867	0.10598	0.11038	0.25628	0.24617
0.0475	0.30689	0.29397	0.10409	0.10747	0.25293	0.24394
0.0483	0.30219	0.29554	0.10219	0.10292	0.24959	0.24617
0.0492	0.29906	0.28928	0.10042	0.099758	0.24625	0.24394
0.05	0.29592	0.28616	0.098773	0.095838	0.24291	0.2406
0.0508	0.29279	0.2799	0.097129	0.092424	0.23956	0.23726
0.0516	0.28966	0.27834	0.095485	0.091539	0.23622	0.23392
0.0524	0.28653	0.27834	0.093841	0.08939	0.23288	0.23169
0.0541	0.28027	0.26895	0.090806	0.08762	0.22731	0.22835
0.0557	0.274	0.26114	0.088023	0.082436	0.22174	0.22278
0.0573	0.26774	0.25019	0.085367	0.078643	0.21616	0.22055
0.059	0.26304	0.2455	0.082712	0.075482	0.21059	0.21498
0.0606	0.25678	0.24394	0.080309	0.07485	0.20614	0.2083
0.0623	0.25208	0.24394	0.078032	0.072574	0.20056	0.20273
0.0639	0.24739	0.2455	0.075882	0.067896	0.19611	0.19605
0.0655	0.24269	0.23924	0.073859	0.063597	0.19165	0.18936
0.0672	0.23799	0.23612	0.071835	0.063471	0.18831	0.18936
0.0688	0.2333	0.2283	0.069938	0.061195	0.18385	0.18713
0.0705	0.23016	0.22048	0.068167	0.059678	0.18051	0.18379
0.0721	0.22547	0.21266	0.066397	0.061068	0.17605	0.18157
0.0737	0.22077	0.20328	0.064753	0.061701	0.17271	0.17711
0.0754	0.21764	0.19546	0.063235	0.063724	0.16937	0.176
0.077	0.21451	0.19233	0.061717	0.064229	0.16602	0.176
0.0786	0.20981	0.18921	0.0602	0.061827	0.16268	0.17377
0.0803	0.20668	0.18608	0.058809	0.060436	0.15934	0.16931
0.0819	0.20355	0.17982	0.057544	0.059804	0.15711	0.16151
0.0836	0.20041	0.17982	0.056279	0.059172	0.15377	0.15817
0.0852	0.19728	0.18139	0.055015	0.059298	0.15154	0.15483
0.0868	0.19415	0.17826	0.05375	0.058919	0.14819	0.15038
0.0885	0.19102	0.17826	0.052612	0.057402	0.14597	0.14703
0.0901	0.18789	0.18139	0.0516	0.05677	0.14374	0.14258
0.0918	0.18632	0.18295	0.050462	0.055	0.1404	0.14369
0.0934	0.18319	0.18452	0.04945	0.053735	0.13817	0.14481
0.095	0.18006	0.17982	0.048438	0.054241	0.13594	0.14258
0.0967	0.17693	0.16888	0.047553	0.054367	0.13371	0.14035
0.0983	0.17536	0.16106	0.046541	0.052091	0.13148	0.13812
0.0999	0.17223	0.15793	0.045656	0.052471	0.12925	0.13367
0.102	0.17067	0.15512	0.044897	0.054241	0.12814	0.13255
0.103	0.16753	0.14855	0.044012	0.051712	0.12591	0.13478
0.105	0.16597	0.14214	0.043253	0.050321	0.12368	0.13144
0.108	0.16127	0.14167	0.041609	0.04716	0.12034	0.13144
0.111	0.15657	0.14073	0.040218	0.044632	0.117	0.12476
0.115	0.15344	0.14011	0.038826	0.042735	0.11365	0.12253
0.118	0.14968	0.14292	0.037562	0.03831	0.11009	0.11585
0.121	0.14608	0.1412	0.036297	0.038689	0.10708	0.11473
0.125	0.14264	0.14386	0.035159	0.039195	0.10418	0.1086
0.128	0.13935	0.14261	0.034147	0.040586	0.10151	0.1125
0.131	0.13622	0.1509	0.033009	0.039321	0.098834	0.11473
0.134	0.13309	0.15371	0.032123	0.033632	0.096382	0.11139
0.138	0.13027	0.15074	0.031112	0.029965	0.094042	0.10783
0.141	0.12745	0.14621	0.030226	0.032747	0.091814	0.10938
0.144	0.12479	0.14886	0.029468	0.030345	0.089585	0.10872
0.147	0.12228	0.14918	0.028582	0.027437	0.087468	0.10593
0.151	0.11978	0.14636	0.027823	0.026172	0.085463	0.097577
0.154	0.11743	0.14214	0.027065	0.027563	0.083568	0.096463
0.157	0.11508	0.14292	0.026432	0.027689	0.081786	0.095906
0.161	0.11289	0.14308	0.0258	0.027816	0.080003	0.09301
0.164	0.1107	0.13901	0.025041	0.027563	0.078332	0.090114
0.167	0.10866	0.1412	0.024535	0.026551	0.07666	0.085213
0.17	0.10663	0.13463	0.023903	0.027563	0.0751	0.084545
0.174	0.10475	0.13432	0.023271	0.027689	0.07354	0.077639
0.177	0.10287	0.13276	0.022765	0.024276	0.072092	0.074185
0.18	0.10115	0.12291	0.022259	0.025161	0.070643	0.071401
0.184	0.099424	0.12384	0.021753	0.030345	0.069306	0.067168
0.187	0.097702	0.13244	0.021247	0.02946	0.067969	0.064272
0.19	0.09598	0.13354	0.020868	0.026551	0.066632	0.060707
0.193	0.094414	0.13526	0.020362	0.024402	0.065406	0.063938
0.197	0.092848	0.13745	0.019982	0.025666	0.064292	0.062712
0.2	0.091439	0.1337	0.019476	0.026804	0.063066	0.065497
0.203	0.09003	0.13432	0.019097	0.026046	0.061952	0.06895
0.206	0.088621	0.13135	0.018718	0.026804	0.060838	0.068282
0.21	0.087212	0.12791	0.018338	0.025034	0.059835	0.069173
0.216	0.08455	0.11603	0.017579	0.020103	0.057829	0.064049
0.223	0.082045	0.099451	0.016947	0.023138	0.055935	0.056697
0.229	0.079696	0.10696	0.016315	0.022506	0.054152	0.055138
0.236	0.077504	0.11227	0.015809	0.019724	0.05237	0.051796
0.242	0.075312	0.10852	0.015176	0.01454	0.05081	0.053578
0.249	0.073277	0.1265	0.014671	0.015172	0.04925	0.047006
0.256	0.071398	0.12807	0.014165	0.012062	0.047801	0.045224
0.262	0.069519	0.11149	0.013659	0.011468	0.046464	0.047675
0.269	0.067797	0.10445	0.013279	0.011164	0.045127	0.050125
0.275	0.066074	0.090694	0.0129	0.013655	0.043901	0.05046
0.282	0.064508	0.078341	0.012457	0.015046	0.042787	0.050237
0.288	0.062943	0.092571	0.012091	0.012226	0.041561	0.05291
0.295	0.061534	0.096949	0.011736	0.0050701	0.040559	0.055138
0.301	0.060124	0.10336	0.011395	0.0027689	0.039444	0.057811
0.308	0.058715	0.0982	0.011066	0.0051839	0.038553	0.054247
