# Supplementary material for: Competitive binding of MatP and topoisomerase IV to the MukB hinge domain
Source: eLife. 2021 Sep 29;10:e70444. doi: 10.7554/eLife.70444 (PMC8523169; doi:10.7554/eLife.70444)
Supplement: Figure 3—figure supplement 1—source data 2. [file elife-70444-fig3-figsupp1-data2.xlsx]

## Sheet: All Cycles
Content	1 - 1 0 min	1 - 2 0 min 30 s	1 - 3 1 min	1 - 4 1 min 30 s	1 - 5 2 min	1 - 6 2 min 30 s	1 - 7 3 min	1 - 8 3 min 30 s	1 - 9 4 min	1 - 10 4 min 30 s	1 - 11 5 min	1 - 12 5 min 30 s	1 - 13 6 min	1 - 14 6 min 30 s	1 - 15 7 min	1 - 16 7 min 30 s	1 - 17 8 min	1 - 18 8 min 30 s	1 - 19 9 min	1 - 20 9 min 30 s	1 - 21 10 min	1 - 22 10 min 30 s	1 - 23 11 min	1 - 24 11 min 30 s	1 - 25 12 min	1 - 26 12 min 30 s	1 - 27 13 min	1 - 28 13 min 30 s	1 - 29 14 min	1 - 30 14 min 30 s	1 - 31 15 min	1 - 32 15 min 30 s	1 - 33 16 min	1 - 34 16 min 30 s	1 - 35 17 min	1 - 36 17 min 30 s	1 - 37 18 min	1 - 38 18 min 30 s	1 - 39 19 min	1 - 40 19 min 30 s	1 - 41 20 min	1 - 42 20 min 30 s	1 - 43 21 min	1 - 44 21 min 30 s	1 - 45 22 min	1 - 46 22 min 30 s	1 - 47 23 min	1 - 48 23 min 30 s	1 - 49 24 min
	0	0.5	1	1.5	2	2.5	3	3.5	4	4.5	5	5.5	6	6.5	7	7.5	8	8.5	9	9.5	10	10.5	11	11.5	12	12.5	13	13.5	14	14.5	15	15.5	16	16.5	17	17.5	18	18.5	19	19.5	20	20.5	21	21.5	22	22.5	23	23.5	24
Blank	1.589	1.4975	1.5371	1.5568	1.5615	1.5773	1.5917	1.5998	1.6013	1.6059	1.6101	1.6128	1.614	1.6081	1.6113	1.6061	1.6099	1.6075	1.6057	1.5976	1.6007	1.599	1.5957	1.5968	1.592	1.5955	1.5939	1.5913	1.5906	1.5864	1.5824	1.5824	1.584	1.5902	1.5834	1.5867	1.5767	1.5801	1.5818	1.581	1.5786	1.582	1.5797	1.5755	1.5788	1.581	1.5796	1.5785	1.5757
Blank	1.4731	1.5081	1.5285	1.5494	1.5781	1.5853	1.6084	1.609	1.6139	1.6171	1.6194	1.6293	1.6335	1.6205	1.6232	1.6173	1.6106	1.6065	1.6168	1.6009	1.6024	1.6008	1.5913	1.5881	1.5847	1.5781	1.5816	1.5719	1.5681	1.566	1.5631	1.5597	1.5545	1.5557	1.554	1.5488	1.5452	1.547	1.5397	1.5386	1.543	1.5398	1.5398	1.5311	1.5361	1.5336	1.5304	1.5273	1.5282
Blank	1.5005	1.5186	1.5473	1.5521	1.5702	1.5831	1.5897	1.5822	1.5836	1.5773	1.5768	1.5747	1.5822	1.5644	1.572	1.5601	1.5558	1.5421	1.556	1.538	1.5339	1.5423	1.5331	1.5226	1.5228	1.5205	1.5224	1.5183	1.5136	1.5116	1.5056	1.503	1.5088	1.4988	1.5024	1.5036	1.5031	1.4991	1.5003	1.5059	1.5043	1.5073	1.5054	1.5019	1.498	1.4981	1.5025	1.5028	1.511
S718 TAG	1.4287	1.4533	1.4501	1.4543	1.4615	1.4583	1.461	1.4596	1.465	1.4618	1.4614	1.4661	1.4601	1.4644	1.4606	1.4633	1.4633	1.4588	1.4635	1.4559	1.4575	1.4611	1.4571	1.4627	1.4574	1.4577	1.4659	1.4661	1.4624	1.4642	1.4595	1.4668	1.47	1.4662	1.4645	1.4705	1.4735	1.4757	1.475	1.4825	1.4793	1.4799	1.4857	1.4819	1.4869	1.4884	1.4924	1.4882	1.493
S718 TAG	1.3612	1.4436	1.4653	1.4617	1.4636	1.4578	1.4665	1.4629	1.4673	1.4717	1.4691	1.4822	1.4816	1.4735	1.4817	1.4788	1.4811	1.4775	1.4791	1.47	1.4697	1.4805	1.4764	1.4649	1.4667	1.4603	1.4658	1.4653	1.4633	1.4562	1.4531	1.4571	1.4536	1.4521	1.4549	1.4521	1.4532	1.453	1.4554	1.4531	1.4541	1.4577	1.4543	1.4559	1.4503	1.4522	1.455	1.4503	1.458
S718 TAG	1.4151	1.4954	1.549	1.5203	1.5318	1.5319	1.5431	1.5221	1.5223	1.507	1.5087	1.5048	1.4864	1.4886	1.4896	1.4904	1.4971	1.5039	1.4934	1.4848	1.4868	1.4924	1.4935	1.4869	1.4813	1.4787	1.4865	1.4775	1.4791	1.4736	1.4698	1.4718	1.4716	1.4732	1.473	1.4671	1.4697	1.4744	1.4775	1.4707	1.4711	1.4742	1.4766	1.4681	1.4688	1.47	1.469	1.464	1.4704
S718 TAG + E	1.4825	1.4987	1.5119	1.5147	1.5151	1.5187	1.5232	1.5195	1.5145	1.512	1.5091	1.5169	1.5147	1.5013	1.5119	1.5099	1.5124	1.5083	1.5107	1.5065	1.5043	1.511	1.5151	1.5101	1.5143	1.5123	1.5164	1.5163	1.5161	1.5245	1.5182	1.5233	1.527	1.5275	1.5272	1.5289	1.528	1.5319	1.5392	1.5396	1.545	1.5477	1.5514	1.5518	1.5569	1.5567	1.5631	1.5568	1.5597
S718 TAG + E	1.2666	1.3088	1.3537	1.3624	1.3886	1.3978	1.4024	1.4135	1.4317	1.4376	1.4419	1.4548	1.4597	1.4589	1.4717	1.4787	1.48	1.4803	1.485	1.4793	1.4845	1.4872	1.4879	1.4769	1.4789	1.4768	1.4842	1.4852	1.4867	1.4825	1.4783	1.4762	1.4852	1.4826	1.4748	1.4739	1.478	1.4757	1.4736	1.4767	1.4771	1.4772	1.4791	1.4796	1.478	1.4821	1.4812	1.4771	1.4829
S718 TAG + E	1.3924	1.4299	1.4581	1.4776	1.4783	1.4786	1.4821	1.4628	1.4694	1.4593	1.4582	1.4511	1.4237	1.4207	1.4247	1.4242	1.4178	1.424	1.4193	1.414	1.4142	1.4219	1.4157	1.4126	1.4071	1.409	1.4181	1.4157	1.4156	1.4129	1.4073	1.4108	1.4203	1.4155	1.4143	1.4142	1.4185	1.4227	1.4249	1.4208	1.4282	1.4281	1.4303	1.4221	1.4273	1.43	1.4301	1.4282	1.4358
S718 TAG + F	1.4529	1.482	1.5411	1.5766	1.6012	1.6232	1.6625	1.6832	1.7098	1.7494	1.7815	1.8166	1.8558	1.8782	1.9236	1.9478	1.9897	2.0091	2.0482	2.0694	2.1019	2.1327	2.1619	2.1878	2.2115	2.2388	2.2707	2.2908	2.313	2.339	2.3526	2.3759	2.3926	2.4074	2.4245	2.4415	2.4527	2.4662	2.4823	2.4942	2.5054	2.5128	2.5205	2.5264	2.531	2.5473	2.5534	2.5494	2.5577
S718 TAG + F	1.3134	1.4204	1.425	1.4003	1.4274	1.4682	1.5146	1.5433	1.5893	1.6279	1.6637	1.699	1.7421	1.7597	1.8019	1.8224	1.8572	1.8919	1.9273	1.9545	1.9766	2.0134	2.0354	2.0641	2.0925	2.1142	2.151	2.1687	2.1944	2.2092	2.2332	2.2526	2.2705	2.29	2.3076	2.3255	2.3362	2.3601	2.3726	2.3868	2.4034	2.4155	2.4287	2.4363	2.4422	2.4554	2.4649	2.4723	2.4763
S718 TAG + F	1.4274	1.4662	1.5396	1.6081	1.6814	1.7287	1.7778	1.8121	1.8479	1.8804	1.9088	1.9414	1.9643	1.9879	2.0201	2.05	2.0792	2.1168	2.14	2.1553	2.1754	2.2058	2.2289	2.2411	2.2638	2.283	2.3054	2.3159	2.3347	2.3497	2.3563	2.3728	2.3899	2.395	2.407	2.4178	2.4309	2.4391	2.4496	2.4467	2.461	2.4663	2.4752	2.4668	2.4734	2.4836	2.4829	2.4823	2.4907
S718 TAG + F + E	1.2021	1.2445	1.3283	1.3414	1.4302	1.4716	1.5144	1.4896	1.5538	1.5937	1.6085	1.6389	1.6713	1.6789	1.7085	1.7159	1.7347	1.7475	1.7694	1.7787	1.8058	1.8169	1.8319	1.8441	1.8493	1.8741	1.896	1.902	1.9215	1.9449	1.9501	1.9609	1.9768	1.9789	1.997	2.008	2.0255	2.0327	2.0415	2.0578	2.0631	2.0759	2.095	2.0949	2.1026	2.1186	2.1353	2.1307	2.149
S718 TAG + F + E	1.2773	1.2916	1.3726	1.421	1.4498	1.4655	1.5004	1.5145	1.5483	1.5591	1.5695	1.5897	1.6243	1.6369	1.654	1.6679	1.6977	1.7106	1.7308	1.7487	1.7662	1.7849	1.8062	1.8186	1.8394	1.8527	1.877	1.8856	1.9057	1.924	1.938	1.9582	1.9774	1.9813	1.9973	2.0112	2.0329	2.0506	2.0621	2.0779	2.0904	2.0995	2.1205	2.1278	2.1344	2.159	2.1675	2.1755	2.1936
S718 TAG + F + E	1.3371	1.3819	1.4902	1.5475	1.612	1.6286	1.654	1.6691	1.6921	1.7073	1.7397	1.7613	1.7443	1.7812	1.7975	1.8223	1.8554	1.8835	1.8882	1.9036	1.9106	1.945	1.9639	1.9797	2	2.0157	2.029	2.0402	2.0665	2.0636	2.0884	2.1092	2.1197	2.1439	2.1483	2.1608	2.1729	2.1908	2.2173	2.2138	2.2318	2.247	2.2561	2.2527	2.2727	2.2827	2.2934	2.294	2.3072
Blank	1.4352	1.429	1.4868	1.5577	1.5758	1.5703	1.5867	1.6046	1.6099	1.6184	1.623	1.6257	1.6316	1.6308	1.6288	1.6357	1.6427	1.6378	1.6365	1.6437	1.6404	1.6367	1.6311	1.6304	1.6286	1.634	1.6247	1.6285	1.6238	1.6213	1.6207	1.6182	1.6205	1.6132	1.6164	1.6143	1.6176	1.6168	1.6159	1.6123	1.6116	1.6124	1.6121	1.6086	1.6149	1.6064	1.6063	1.6077	1.6115
Blank	1.3809	1.4623	1.465	1.4929	1.5138	1.5224	1.541	1.5673	1.5714	1.5783	1.5899	1.5942	1.6028	1.6022	1.6035	1.6042	1.6073	1.6045	1.6021	1.6076	1.6018	1.6009	1.596	1.5915	1.5976	1.5977	1.5894	1.5891	1.5864	1.5813	1.5782	1.5795	1.5848	1.5743	1.5766	1.5779	1.5784	1.5777	1.5749	1.5704	1.5719	1.5707	1.5679	1.5643	1.5699	1.5598	1.566	1.5646	1.5654
Blank	1.3226	1.3889	1.4122	1.4393	1.476	1.4963	1.5117	1.5531	1.5578	1.559	1.5673	1.5761	1.5819	1.5823	1.5929	1.5838	1.5929	1.5852	1.5922	1.5892	1.584	1.5871	1.5827	1.5792	1.5851	1.582	1.5734	1.5726	1.5713	1.569	1.5669	1.5712	1.5759	1.5657	1.5667	1.5671	1.5664	1.5664	1.5617	1.5637	1.5622	1.5644	1.5597	1.5582	1.5635	1.5564	1.5552	1.5545	1.555
fS718 TAG	1.6419	1.6192	1.6376	1.6663	1.6789	1.6937	1.7091	1.7128	1.7132	1.7278	1.7232	1.7325	1.739	1.7418	1.741	1.7444	1.7462	1.7437	1.7505	1.7529	1.7469	1.7455	1.7467	1.739	1.7435	1.7435	1.7378	1.738	1.732	1.7278	1.7307	1.7272	1.7319	1.7227	1.7181	1.7192	1.7165	1.7153	1.7107	1.7161	1.7109	1.7108	1.7068	1.7067	1.7094	1.7037	1.7039	1.7073	1.7071
fS718 TAG	1.3696	1.3893	1.4189	1.4407	1.4635	1.479	1.4991	1.509	1.5221	1.5345	1.5431	1.5567	1.5522	1.5555	1.5451	1.553	1.5656	1.5561	1.5619	1.5712	1.5676	1.5615	1.5688	1.564	1.567	1.5667	1.5702	1.576	1.572	1.5798	1.5823	1.5781	1.5858	1.5796	1.5748	1.5764	1.5781	1.5717	1.5801	1.5772	1.5804	1.5768	1.5766	1.5768	1.5826	1.5813	1.5795	1.5792	1.5789
fS718 TAG	1.5086	1.5069	1.5113	1.5563	1.5908	1.5968	1.6382	1.6408	1.6651	1.6992	1.7115	1.7288	1.7195	1.7281	1.7033	1.7016	1.7253	1.7086	1.7095	1.7142	1.7048	1.6909	1.7031	1.6897	1.6817	1.6738	1.6703	1.6744	1.6674	1.6831	1.6826	1.6641	1.6669	1.6673	1.6591	1.6604	1.6528	1.6428	1.6411	1.6485	1.6518	1.6438	1.6408	1.6518	1.6407	1.6377	1.6404	1.6391	1.6353
fS718 TAG + E	1.7721	1.5884	1.5903	1.6014	1.5835	1.5987	1.6121	1.6315	1.6398	1.6382	1.6438	1.6505	1.65	1.652	1.6525	1.6549	1.6594	1.6481	1.6525	1.6544	1.6522	1.642	1.6392	1.6399	1.6413	1.6425	1.6345	1.6327	1.6249	1.6196	1.6224	1.6227	1.6203	1.6083	1.6095	1.6078	1.6098	1.6112	1.6074	1.6076	1.6047	1.6073	1.5999	1.603	1.6074	1.6032	1.6032	1.604	1.6086
fS718 TAG + E	1.492	1.5303	1.4829	1.5311	1.5741	1.5822	1.6045	1.5963	1.6122	1.6306	1.6297	1.6342	1.6243	1.6207	1.6064	1.597	1.6202	1.6083	1.6084	1.6135	1.6072	1.6006	1.6042	1.5997	1.5943	1.5922	1.5947	1.5893	1.5823	1.5931	1.5897	1.5835	1.589	1.579	1.5768	1.578	1.5801	1.5711	1.5728	1.5737	1.5737	1.5667	1.5693	1.5678	1.5621	1.5628	1.5636	1.5647	1.5627
fS718 TAG + E	1.4719	1.5488	1.5719	1.5876	1.5842	1.6156	1.6158	1.6143	1.6216	1.6002	1.6083	1.6052	1.631	1.6016	1.6229	1.6229	1.6301	1.6181	1.618	1.6252	1.6116	1.6103	1.6086	1.6042	1.6038	1.6086	1.5923	1.5913	1.5903	1.5814	1.5812	1.5763	1.5888	1.5752	1.577	1.5702	1.5728	1.5675	1.5706	1.5654	1.5682	1.5634	1.567	1.5569	1.5617	1.5553	1.5538	1.5533	1.5557
fS718 TAG + F	1.4341	1.4571	1.5027	1.5422	1.5698	1.5995	1.6272	1.6616	1.6874	1.7179	1.7363	1.7634	1.8006	1.8311	1.8482	1.8896	1.9274	1.9405	1.9738	2.0091	2.0337	2.0692	2.0991	2.121	2.1418	2.1781	2.2066	2.2311	2.2679	2.2901	2.3087	2.3274	2.3627	2.3771	2.3998	2.4251	2.4477	2.4642	2.4895	2.5028	2.5227	2.5424	2.5564	2.575	2.5965	2.6078	2.6333	2.6424	2.668
fS718 TAG + F	1.5666	1.5858	1.6235	1.6373	1.6892	1.7355	1.764	1.7622	1.8043	1.8341	1.8567	1.8681	1.9019	1.9158	1.9291	1.9492	1.9985	2.0055	2.034	2.063	2.0754	2.0951	2.1317	2.1438	2.1729	2.1857	2.208	2.2237	2.2471	2.2726	2.2907	2.2992	2.3353	2.3454	2.3684	2.4081	2.4553	2.5174	2.5941	2.6808	2.7134	2.6445	2.6096	2.6023	2.5704	2.5434	2.5493	2.5512	2.5621
fS718 TAG + F	1.3097	1.3711	1.4149	1.4686	1.5383	1.5751	1.6472	1.6582	1.7059	1.7786	1.7942	1.8226	1.8319	1.8769	1.8541	1.8679	1.9284	1.9416	1.9649	2.001	2.0171	2.0234	2.0812	2.096	2.1116	2.1212	2.1535	2.1843	2.2049	2.2587	2.2855	2.268	2.3025	2.3238	2.3503	2.3585	2.3884	2.3893	2.4143	2.4326	2.4708	2.4652	2.4709	2.5039	2.5015	2.5221	2.5394	2.5532	2.5555
fS718 TAG+ F + E	1.4808	1.423	1.465	1.5263	1.5526	1.6062	1.6248	1.6597	1.6713	1.6798	1.6947	1.707	1.737	1.7475	1.762	1.7892	1.8041	1.8204	1.8267	1.8423	1.852	1.8783	1.9019	1.9055	1.9216	1.9386	1.9511	1.9479	1.9696	1.9799	1.9837	2.0049	2.0179	2.0209	2.0374	2.0569	2.084	2.077	2.0979	2.109	2.1193	2.1277	2.1415	2.1487	2.1734	2.1798	2.1948	2.2116	2.2309
fS718 TAG+ F + E	1.2724	1.3259	1.3529	1.4015	1.444	1.4748	1.5063	1.514	1.5576	1.5949	1.6216	1.6509	1.6567	1.6574	1.6605	1.6708	1.7173	1.7201	1.7352	1.7664	1.7708	1.7675	1.7965	1.7897	1.8182	1.8199	1.8493	1.866	1.8831	1.9032	1.9274	1.9266	1.9479	1.9575	1.9633	1.979	1.9932	2.0031	2.0184	2.0245	2.0457	2.0517	2.0554	2.0771	2.088	2.0913	2.1119	2.1214	2.1322
fS718 TAG+ F + E	1.5018	1.5313	1.536	1.5689	1.5973	1.6071	1.6329	1.6584	1.6732	1.7036	1.7208	1.7367	1.7451	1.7786	1.7757	1.7851	1.814	1.8353	1.8452	1.8641	1.878	1.8913	1.9141	1.9248	1.9364	1.9541	1.967	1.982	1.9934	2.0165	2.0331	2.0399	2.0608	2.0692	2.0878	2.1022	2.1171	2.1212	2.1367	2.1551	2.1702	2.1776	2.1925	2.2049	2.2312	2.2432	2.2531	2.2525	2.2635
Blank	1.52087	1.50807	1.53763	1.55277	1.56993	1.5819	1.5966	1.597	1.5996	1.6001	1.6021	1.6056	1.6099	1.59767	1.60217	1.5945	1.5921	1.58537	1.59283	1.57883	1.579	1.5807	1.57337	1.56917	1.5665	1.5647	1.56597	1.5605	1.55743	1.55467	1.55037	1.54837	1.5491	1.54823	1.5466	1.54637	1.54167	1.54207	1.5406	1.54183	1.54197	1.54303	1.54163	1.53617	1.53763	1.53757	1.5375	1.5362	1.5383
S718 TAG	-0.1192	-0.0439667	-0.0495	-0.074	-0.0843	-0.0992333	-0.1064	-0.115467	-0.114733	-0.119933	-0.122367	-0.121233	-0.133867	-0.122167	-0.124867	-0.117	-0.1116	-0.1053	-0.114167	-0.1086	-0.107667	-0.1027	-0.0977	-0.0976667	-0.0980333	-0.0991333	-0.0932333	-0.0908667	-0.0891667	-0.09	-0.0895667	-0.0831333	-0.0840333	-0.0844	-0.0824667	-0.0831333	-0.0762	-0.0743667	-0.0713	-0.0730667	-0.0738	-0.0724333	-0.0694333	-0.0675333	-0.0689667	-0.0673667	-0.0653667	-0.0687	-0.0645
S718 TAG + E	-0.140367	-0.0956	-0.0964	-0.1012	-0.109267	-0.116867	-0.127367	-0.131733	-0.127733	-0.130467	-0.132367	-0.131333	-0.143867	-0.137367	-0.132733	-0.123567	-0.122033	-0.1145	-0.121167	-0.112233	-0.111333	-0.107333	-0.100467	-0.102633	-0.0997333	-0.0986667	-0.0930667	-0.0881	-0.0846333	-0.0813667	-0.0824333	-0.0782667	-0.0716	-0.0730333	-0.0745	-0.0740333	-0.0668333	-0.0653	-0.0613667	-0.0628	-0.0585333	-0.0587	-0.0547	-0.0516667	-0.0502333	-0.0479667	-0.0460333	-0.0488333	-0.0455
S718 TAG + F	-0.122967	-0.0518667	-0.0357333	-0.0244333	6.66667e-05	0.0248	0.0550333	0.0825333	0.116067	0.152467	0.182567	0.2134	0.244167	0.2776	0.313033	0.345567	0.383267	0.420567	0.445667	0.4809	0.505633	0.5366	0.5687	0.595167	0.622767	0.6473	0.6764	0.697967	0.723267	0.744633	0.763667	0.7854	0.8019	0.8159	0.8331	0.848567	0.864933	0.879733	0.894233	0.900733	0.914633	0.921833	0.933167	0.940333	0.944567	0.957867	0.9629	0.965133	0.969933
S718 TAG + F + E	-0.2487	-0.202067	-0.1406	-0.116133	-0.0726	-0.06	-0.0403333	-0.0392667	-0.00153333	0.0199333	0.0371333	0.0577	0.0700667	0.101333	0.117833	0.140867	0.1705	0.195167	0.2033	0.2315	0.248533	0.268233	0.293967	0.311633	0.329733	0.349467	0.368033	0.3821	0.407133	0.422833	0.4418	0.461067	0.475533	0.486467	0.500933	0.513633	0.535433	0.5493	0.566367	0.574667	0.586467	0.597767	0.615567	0.6223	0.632267	0.6492	0.661233	0.663867	0.6783
Blank	1.37957	1.42673	1.45467	1.49663	1.52187	1.52967	1.54647	1.575	1.5797	1.58523	1.5934	1.59867	1.60543	1.6051	1.6084	1.6079	1.6143	1.60917	1.61027	1.6135	1.60873	1.60823	1.60327	1.60037	1.60377	1.60457	1.59583	1.59673	1.59383	1.59053	1.5886	1.58963	1.59373	1.5844	1.58657	1.58643	1.58747	1.58697	1.58417	1.58213	1.5819	1.5825	1.5799	1.57703	1.58277	1.5742	1.57583	1.5756	1.5773
fS718 TAG	1.62967	1.557	1.55833	1.57887	1.57767	1.56503	1.56043	1.53833	1.5174	1.50137	1.4767	1.45927	1.42607	1.39753	1.3501	1.32077	1.29577	1.2489	1.2283	1.19853	1.16747	1.12937	1.10417	1.06907	1.0413	1.01403	0.983033	0.964833	0.933867	0.918933	0.901533	0.871067	0.859633	0.840633	0.817567	0.803433	0.7842	0.763533	0.749733	0.746533	0.733067	0.721967	0.708233	0.704767	0.699667	0.683033	0.678367	0.676733	0.6705
fS718 TAG + E	1.70163	1.6077	1.5841	1.5978	1.58053	1.57403	1.55577	1.5315	1.50847	1.47053	1.4447	1.41657	1.39093	1.34717	1.31423	1.27937	1.2533	1.20427	1.18063	1.15013	1.11803	1.08103	1.04863	1.01943	0.990367	0.967133	0.930767	0.906467	0.8759	0.8534	0.8341	0.808767	0.797467	0.7716	0.754667	0.736767	0.722633	0.703533	0.689367	0.6815	0.667567	0.6573	0.645567	0.635567	0.6325	0.6159	0.610633	0.608867	0.605733
fS718 TAG + F	1.55977	1.5232	1.54943	1.5738	1.59903	1.6119	1.62443	1.61147	1.61647	1.6244	1.61317	1.60463	1.60063	1.597	1.5641	1.55667	1.56817	1.54197	1.54523	1.54347	1.53643	1.52597	1.5353	1.5251	1.51933	1.51437	1.51297	1.51507	1.5167	1.52917	1.5313	1.5128	1.5316	1.53287	1.53973	1.54867	1.56553	1.57723	1.60507	1.638	1.65433	1.62887	1.61247	1.62007	1.61157	1.5999	1.6111	1.61713	1.62527
fS718 TAG+ F + E	1.5413	1.4786	1.48703	1.52333	1.53123	1.5379	1.53297	1.52817	1.51797	1.50697	1.49647	1.4848	1.46877	1.45023	1.4197	1.4028	1.3952	1.37137	1.3567	1.34337	1.32797	1.3091	1.30213	1.27817	1.2693	1.2569	1.24607	1.234	1.22543	1.2219	1.21773	1.20507	1.20697	1.19997	1.1964	1.19747	1.19983	1.18737	1.1901	1.19547	1.1971	1.19717	1.19663	1.20323	1.21963	1.21357	1.2237	1.23003	1.23893
[truncated: 131 more columns]
