# Supplementary material for: Competitive binding of MatP and topoisomerase IV to the MukB hinge domain
Source: eLife. 2021 Sep 29;10:e70444. doi: 10.7554/eLife.70444 (PMC8523169; doi:10.7554/eLife.70444)
Supplement: Figure 3—figure supplement 1—source data 3. [file elife-70444-fig3-figsupp1-data3.xlsx]

## Sheet: Sheet1
[MukB] WT	Bound %	Error		[MukB] KKK	Bound %	Error
800	68.5	13.1
400	62.7	15.3		1000	35.1	12.7
200	37.9	13.8		500	25.1	6.6
100	22.4	11.9		250	17	12.3
50	14.7	9.3		125	1	0
25	1	1
[MukB] WT		Bound %
25	0.01341	1.341
25.7758	0.01429	1.429
26.5515	0.0152	1.52
27.3273	0.01614	1.614
28.1031	0.01711	1.711
28.8789	0.0181	1.81
29.6547	0.01912	1.912
30.4304	0.02017	2.017
31.2062	0.02125	2.125
31.982	0.02236	2.236
32.7578	0.02349	2.349
33.5335	0.02464	2.464
34.3093	0.02583	2.583
35.0851	0.02704	2.704
35.8609	0.02828	2.828
36.6366	0.02954	2.954
37.4124	0.03083	3.083
38.1882	0.03214	3.214
38.964	0.03348	3.348
39.7397	0.03484	3.484
40.5155	0.03623	3.623
41.2913	0.03764	3.764
42.0671	0.03908	3.908
42.8428	0.04054	4.054
43.6186	0.04203	4.203
44.3944	0.04353	4.353
45.1702	0.04506	4.506
45.946	0.04662	4.662
46.7217	0.04819	4.819
47.4975	0.04979	4.979
48.2733	0.05141	5.141
49.0491	0.05305	5.305
49.8248	0.05471	5.471
50.6006	0.05639	5.639
51.3764	0.05809	5.809
52.1521	0.05982	5.982
52.9279	0.06156	6.156
53.7037	0.06332	6.332
54.4795	0.0651	6.51
55.2553	0.0669	6.69
56.031	0.06872	6.872
56.8068	0.07055	7.055
57.5826	0.07241	7.241
58.3584	0.07428	7.428
59.1341	0.07616	7.616
59.9099	0.07807	7.807
60.6857	0.07999	7.999
61.4615	0.08192	8.192
62.2372	0.08387	8.387
63.013	0.08584	8.584
63.7888	0.08782	8.782
64.5646	0.08982	8.982
65.3403	0.09183	9.183
66.1161	0.09385	9.385
66.8919	0.09589	9.589
67.6677	0.09794	9.794
68.4434	0.1	10
69.2192	0.10207	10.207
69.995	0.10416	10.416
70.7708	0.10625	10.625
71.5465	0.10836	10.836
72.3223	0.11048	11.048
73.0981	0.11261	11.261
73.8739	0.11475	11.475
74.6496	0.1169	11.69
75.4254	0.11906	11.906
76.2012	0.12123	12.123
76.977	0.1234	12.34
77.7528	0.12559	12.559
78.5285	0.12778	12.778
79.3043	0.12998	12.998
80.0801	0.13219	13.219
80.8559	0.1344	13.44
81.6316	0.13662	13.662
82.4074	0.13885	13.885
83.1832	0.14108	14.108
83.959	0.14332	14.332
84.7347	0.14556	14.556
85.5105	0.14781	14.781
86.2863	0.15007	15.007
87.0621	0.15232	15.232
87.8378	0.15459	15.459
88.6136	0.15685	15.685
89.3894	0.15912	15.912
90.1652	0.16139	16.139
90.9409	0.16367	16.367
91.7167	0.16595	16.595
92.4925	0.16823	16.823
93.2683	0.17051	17.051
94.044	0.17279	17.279
94.8198	0.17508	17.508
95.5956	0.17736	17.736
96.3714	0.17965	17.965
97.1471	0.18194	18.194
97.9229	0.18423	18.423
98.6987	0.18652	18.652
99.4745	0.1888	18.88
100.25	0.19109	19.109
101.026	0.19338	19.338
101.802	0.19567	19.567
102.578	0.19795	19.795
103.353	0.20023	20.023
104.129	0.20252	20.252
104.905	0.2048	20.48
105.681	0.20708	20.708
106.456	0.20935	20.935
107.232	0.21163	21.163
108.008	0.2139	21.39
108.784	0.21617	21.617
109.56	0.21843	21.843
110.335	0.22069	22.069
111.111	0.22295	22.295
111.887	0.22521	22.521
112.663	0.22746	22.746
113.438	0.22971	22.971
114.214	0.23195	23.195
114.99	0.23419	23.419
115.766	0.23642	23.642
116.542	0.23865	23.865
117.317	0.24088	24.088
118.093	0.2431	24.31
118.869	0.24531	24.531
119.645	0.24752	24.752
120.42	0.24972	24.972
121.196	0.25192	25.192
121.972	0.25412	25.412
122.748	0.2563	25.63
123.524	0.25848	25.848
124.299	0.26066	26.066
125.075	0.26283	26.283
125.851	0.26499	26.499
126.627	0.26715	26.715
127.402	0.26929	26.929
128.178	0.27144	27.144
128.954	0.27357	27.357
129.73	0.2757	27.57
130.506	0.27782	27.782
131.281	0.27994	27.994
132.057	0.28205	28.205
132.833	0.28415	28.415
133.609	0.28624	28.624
134.384	0.28832	28.832
135.16	0.2904	29.04
135.936	0.29247	29.247
136.712	0.29454	29.454
137.487	0.29659	29.659
138.263	0.29864	29.864
139.039	0.30068	30.068
139.815	0.30271	30.271
140.591	0.30473	30.473
141.366	0.30675	30.675
142.142	0.30875	30.875
142.918	0.31075	31.075
143.694	0.31274	31.274
144.469	0.31472	31.472
145.245	0.3167	31.67
146.021	0.31866	31.866
146.797	0.32062	32.062
147.573	0.32257	32.257
148.348	0.32451	32.451
149.124	0.32644	32.644
149.9	0.32836	32.836
150.676	0.33027	33.027
151.451	0.33218	33.218
152.227	0.33407	33.407
153.003	0.33596	33.596
153.779	0.33784	33.784
154.555	0.33971	33.971
155.33	0.34157	34.157
156.106	0.34342	34.342
156.882	0.34527	34.527
157.658	0.3471	34.71
158.433	0.34893	34.893
159.209	0.35075	35.075
159.985	0.35255	35.255
160.761	0.35435	35.435
161.537	0.35614	35.614
162.312	0.35792	35.792
163.088	0.3597	35.97
163.864	0.36146	36.146
164.64	0.36321	36.321
165.415	0.36496	36.496
166.191	0.3667	36.67
166.967	0.36842	36.842
167.743	0.37014	37.014
168.519	0.37185	37.185
169.294	0.37355	37.355
170.07	0.37524	37.524
170.846	0.37693	37.693
171.622	0.3786	37.86
172.397	0.38027	38.027
173.173	0.38192	38.192
173.949	0.38357	38.357
174.725	0.38521	38.521
175.5	0.38684	38.684
176.276	0.38846	38.846
177.052	0.39007	39.007
177.828	0.39168	39.168
178.604	0.39327	39.327
179.379	0.39486	39.486
180.155	0.39643	39.643
180.931	0.398	39.8
181.707	0.39956	39.956
182.482	0.40111	40.111
183.258	0.40265	40.265
184.034	0.40419	40.419
184.81	0.40571	40.571
185.586	0.40723	40.723
186.361	0.40874	40.874
187.137	0.41024	41.024
187.913	0.41173	41.173
188.689	0.41321	41.321
189.464	0.41468	41.468
190.24	0.41615	41.615
191.016	0.41761	41.761
191.792	0.41906	41.906
192.568	0.4205	42.05
193.343	0.42193	42.193
194.119	0.42335	42.335
194.895	0.42477	42.477
195.671	0.42618	42.618
196.446	0.42758	42.758
197.222	0.42897	42.897
197.998	0.43035	43.035
198.774	0.43173	43.173
199.55	0.43309	43.309
200.325	0.43445	43.445
201.101	0.4358	43.58
201.877	0.43715	43.715
202.653	0.43848	43.848
203.428	0.43981	43.981
204.204	0.44113	44.113
204.98	0.44244	44.244
205.756	0.44374	44.374
206.532	0.44504	44.504
207.307	0.44633	44.633
208.083	0.44761	44.761
208.859	0.44888	44.888
209.635	0.45015	45.015
210.41	0.45141	45.141
211.186	0.45266	45.266
211.962	0.4539	45.39
212.738	0.45514	45.514
213.514	0.45637	45.637
214.289	0.45759	45.759
215.065	0.4588	45.88
215.841	0.46001	46.001
216.617	0.46121	46.121
217.392	0.4624	46.24
218.168	0.46358	46.358
218.944	0.46476	46.476
219.72	0.46593	46.593
220.495	0.4671	46.71
221.271	0.46825	46.825
222.047	0.4694	46.94
222.823	0.47055	47.055
223.599	0.47168	47.168
224.374	0.47281	47.281
225.15	0.47393	47.393
225.926	0.47505	47.505
226.702	0.47616	47.616
227.477	0.47726	47.726
228.253	0.47835	47.835
229.029	0.47944	47.944
229.805	0.48053	48.053
230.581	0.4816	48.16
231.356	0.48267	48.267
232.132	0.48373	48.373
232.908	0.48479	48.479
233.684	0.48584	48.584
234.459	0.48688	48.688
235.235	0.48792	48.792
236.011	0.48895	48.895
236.787	0.48997	48.997
237.563	0.49099	49.099
238.338	0.492	49.2
239.114	0.49301	49.301
239.89	0.49401	49.401
240.666	0.495	49.5
241.441	0.49599	49.599
242.217	0.49697	49.697
242.993	0.49795	49.795
243.769	0.49892	49.892
244.545	0.49988	49.988
245.32	0.50084	50.084
246.096	0.50179	50.179
246.872	0.50274	50.274
247.648	0.50368	50.368
248.423	0.50462	50.462
249.199	0.50555	50.555
249.975	0.50647	50.647
250.751	0.50739	50.739
251.527	0.5083	50.83
252.302	0.50921	50.921
253.078	0.51011	51.011
253.854	0.51101	51.101
254.63	0.5119	51.19
255.405	0.51278	51.278
256.181	0.51366	51.366
256.957	0.51454	51.454
257.733	0.51541	51.541
258.509	0.51627	51.627
259.284	0.51713	51.713
260.06	0.51798	51.798
260.836	0.51883	51.883
261.612	0.51968	51.968
262.387	0.52051	52.051
263.163	0.52135	52.135
263.939	0.52218	52.218
264.715	0.523	52.3
265.49	0.52382	52.382
266.266	0.52463	52.463
267.042	0.52544	52.544
267.818	0.52624	52.624
268.594	0.52704	52.704
269.369	0.52784	52.784
270.145	0.52863	52.863
270.921	0.52941	52.941
271.697	0.53019	53.019
272.472	0.53097	53.097
273.248	0.53174	53.174
274.024	0.5325	53.25
274.8	0.53327	53.327
275.576	0.53402	53.402
276.351	0.53477	53.477
277.127	0.53552	53.552
277.903	0.53627	53.627
278.679	0.53701	53.701
279.454	0.53774	53.774
280.23	0.53847	53.847
281.006	0.5392	53.92
281.782	0.53992	53.992
282.558	0.54064	54.064
283.333	0.54135	54.135
284.109	0.54206	54.206
284.885	0.54276	54.276
285.661	0.54346	54.346
286.436	0.54416	54.416
287.212	0.54485	54.485
287.988	0.54554	54.554
288.764	0.54622	54.622
289.54	0.5469	54.69
290.315	0.54758	54.758
291.091	0.54825	54.825
291.867	0.54892	54.892
292.643	0.54959	54.959
293.418	0.55025	55.025
294.194	0.5509	55.09
294.97	0.55155	55.155
295.746	0.5522	55.22
296.522	0.55285	55.285
297.297	0.55349	55.349
298.073	0.55413	55.413
298.849	0.55476	55.476
299.625	0.55539	55.539
300.4	0.55602	55.602
301.176	0.55664	55.664
301.952	0.55726	55.726
302.728	0.55788	55.788
303.503	0.55849	55.849
304.279	0.5591	55.91
305.055	0.5597	55.97
305.831	0.5603	56.03
306.607	0.5609	56.09
307.382	0.5615	56.15
308.158	0.56209	56.209
308.934	0.56267	56.267
309.71	0.56326	56.326
310.485	0.56384	56.384
311.261	0.56442	56.442
312.037	0.56499	56.499
312.813	0.56556	56.556
313.589	0.56613	56.613
314.364	0.56669	56.669
315.14	0.56726	56.726
315.916	0.56781	56.781
316.692	0.56837	56.837
317.467	0.56892	56.892
318.243	0.56947	56.947
319.019	0.57001	57.001
319.795	0.57056	57.056
320.571	0.5711	57.11
321.346	0.57163	57.163
322.122	0.57217	57.217
322.898	0.5727	57.27
323.674	0.57322	57.322
324.449	0.57375	57.375
325.225	0.57427	57.427
326.001	0.57479	57.479
326.777	0.5753	57.53
327.553	0.57581	57.581
328.328	0.57632	57.632
329.104	0.57683	57.683
329.88	0.57733	57.733
330.656	0.57784	57.784
331.431	0.57833	57.833
332.207	0.57883	57.883
332.983	0.57932	57.932
333.759	0.57981	57.981
334.535	0.5803	58.03
335.31	0.58078	58.078
336.086	0.58127	58.127
336.862	0.58174	58.174
337.638	0.58222	58.222
338.413	0.58269	58.269
339.189	0.58317	58.317
339.965	0.58363	58.363
340.741	0.5841	58.41
341.517	0.58456	58.456
342.292	0.58502	58.502
343.068	0.58548	58.548
343.844	0.58594	58.594
344.62	0.58639	58.639
345.395	0.58684	58.684
346.171	0.58729	58.729
346.947	0.58774	58.774
347.723	0.58818	58.818
348.498	0.58862	58.862
349.274	0.58906	58.906
350.05	0.5895	58.95
350.826	0.58993	58.993
351.602	0.59036	59.036
352.377	0.59079	59.079
353.153	0.59122	59.122
353.929	0.59164	59.164
354.705	0.59207	59.207
355.48	0.59248	59.248
356.256	0.5929	59.29
357.032	0.59332	59.332
357.808	0.59373	59.373
358.584	0.59414	59.414
359.359	0.59455	59.455
360.135	0.59496	59.496
360.911	0.59536	59.536
361.687	0.59576	59.576
362.462	0.59616	59.616
363.238	0.59656	59.656
364.014	0.59696	59.696
364.79	0.59735	59.735
365.566	0.59774	59.774
366.341	0.59813	59.813
367.117	0.59852	59.852
367.893	0.59891	59.891
368.669	0.59929	59.929
369.444	0.59967	59.967
370.22	0.60005	60.005
370.996	0.60043	60.043
371.772	0.6008	60.08
372.548	0.60118	60.118
373.323	0.60155	60.155
374.099	0.60192	60.192
374.875	0.60228	60.228
375.651	0.60265	60.265
376.426	0.60301	60.301
377.202	0.60337	60.337
377.978	0.60373	60.373
378.754	0.60409	60.409
379.53	0.60445	60.445
380.305	0.6048	60.48
381.081	0.60516	60.516
381.857	0.60551	60.551
382.633	0.60585	60.585
383.408	0.6062	60.62
384.184	0.60655	60.655
384.96	0.60689	60.689
385.736	0.60723	60.723
386.512	0.60757	60.757
387.287	0.60791	60.791
388.063	0.60825	60.825
388.839	0.60858	60.858
389.615	0.60891	60.891
390.39	0.60924	60.924
391.166	0.60957	60.957
391.942	0.6099	60.99
392.718	0.61023	61.023
393.493	0.61055	61.055
394.269	0.61087	61.087
395.045	0.6112	61.12
395.821	0.61152	61.152
396.597	0.61183	61.183
397.372	0.61215	61.215
398.148	0.61246	61.246
398.924	0.61278	61.278
399.7	0.61309	61.309
400.475	0.6134	61.34
401.251	0.61371	61.371
402.027	0.61401	61.401
402.803	0.61432	61.432
403.579	0.61462	61.462
404.354	0.61493	61.493
405.13	0.61523	61.523
405.906	0.61553	61.553
406.682	0.61582	61.582
407.457	0.61612	61.612
408.233	0.61641	61.641
409.009	0.61671	61.671
409.785	0.617	61.7
410.561	0.61729	61.729
411.336	0.61758	61.758
412.112	0.61787	61.787
412.888	0.61815	61.815
413.664	0.61844	61.844
414.439	0.61872	61.872
415.215	0.619	61.9
415.991	0.61928	61.928
416.767	0.61956	61.956
417.543	0.61984	61.984
418.318	0.62012	62.012
419.094	0.62039	62.039
419.87	0.62066	62.066
420.646	0.62094	62.094
421.421	0.62121	62.121
422.197	0.62148	62.148
422.973	0.62175	62.175
423.749	0.62201	62.201
424.525	0.62228	62.228
425.3	0.62254	62.254
426.076	0.62281	62.281
426.852	0.62307	62.307
427.628	0.62333	62.333
428.403	0.62359	62.359
429.179	0.62385	62.385
429.955	0.6241	62.41
430.731	0.62436	62.436
431.507	0.62461	62.461
432.282	0.62487	62.487
433.058	0.62512	62.512
433.834	0.62537	62.537
434.61	0.62562	62.562
435.385	0.62587	62.587
436.161	0.62611	62.611
436.937	0.62636	62.636
437.713	0.6266	62.66
438.488	0.62685	62.685
439.264	0.62709	62.709
440.04	0.62733	62.733
440.816	0.62757	62.757
441.592	0.62781	62.781
442.367	0.62805	62.805
443.143	0.62829	62.829
443.919	0.62852	62.852
444.695	0.62876	62.876
445.47	0.62899	62.899
446.246	0.62922	62.922
447.022	0.62945	62.945
447.798	0.62968	62.968
448.574	0.62991	62.991
449.349	0.63014	63.014
450.125	0.63037	63.037
450.901	0.63059	63.059
451.677	0.63082	63.082
452.452	0.63104	63.104
453.228	0.63127	63.127
454.004	0.63149	63.149
454.78	0.63171	63.171
455.556	0.63193	63.193
456.331	0.63215	63.215
457.107	0.63237	63.237
457.883	0.63258	63.258
458.659	0.6328	63.28
459.434	0.63301	63.301
460.21	0.63323	63.323
460.986	0.63344	63.344
461.762	0.63365	63.365
462.538	0.63386	63.386
463.313	0.63407	63.407
464.089	0.63428	63.428
464.865	0.63449	63.449
465.641	0.63469	63.469
466.416	0.6349	63.49
467.192	0.63511	63.511
467.968	0.63531	63.531
468.744	0.63551	63.551
469.52	0.63572	63.572
470.295	0.63592	63.592
471.071	0.63612	63.612
471.847	0.63632	63.632
472.623	0.63652	63.652
473.398	0.63671	63.671
474.174	0.63691	63.691
474.95	0.63711	63.711
475.726	0.6373	63.73
476.502	0.6375	63.75
477.277	0.63769	63.769
478.053	0.63788	63.788
478.829	0.63807	63.807
479.605	0.63826	63.826
480.38	0.63845	63.845
481.156	0.63864	63.864
481.932	0.63883	63.883
482.708	0.63902	63.902
483.483	0.63921	63.921
484.259	0.63939	63.939
485.035	0.63958	63.958
485.811	0.63976	63.976
486.587	0.63994	63.994
487.362	0.64013	64.013
488.138	0.64031	64.031
488.914	0.64049	64.049
489.69	0.64067	64.067
490.465	0.64085	64.085
491.241	0.64103	64.103
492.017	0.64121	64.121
492.793	0.64138	64.138
493.569	0.64156	64.156
494.344	0.64173	64.173
495.12	0.64191	64.191
495.896	0.64208	64.208
496.672	0.64226	64.226
497.447	0.64243	64.243
498.223	0.6426	64.26
498.999	0.64277	64.277
499.775	0.64294	64.294
500.551	0.64311	64.311
501.326	0.64328	64.328
502.102	0.64345	64.345
502.878	0.64361	64.361
503.654	0.64378	64.378
504.429	0.64395	64.395
505.205	0.64411	64.411
505.981	0.64428	64.428
506.757	0.64444	64.444
507.533	0.6446	64.46
508.308	0.64477	64.477
509.084	0.64493	64.493
509.86	0.64509	64.509
510.636	0.64525	64.525
511.411	0.64541	64.541
512.187	0.64557	64.557
512.963	0.64573	64.573
513.739	0.64588	64.588
514.515	0.64604	64.604
515.29	0.6462	64.62
516.066	0.64635	64.635
516.842	0.64651	64.651
517.618	0.64666	64.666
518.393	0.64681	64.681
519.169	0.64697	64.697
519.945	0.64712	64.712
520.721	0.64727	64.727
521.496	0.64742	64.742
522.272	0.64757	64.757
523.048	0.64772	64.772
523.824	0.64787	64.787
524.6	0.64802	64.802
525.375	0.64817	64.817
526.151	0.64832	64.832
526.927	0.64846	64.846
527.703	0.64861	64.861
528.478	0.64875	64.875
529.254	0.6489	64.89
530.03	0.64904	64.904
530.806	0.64919	64.919
531.582	0.64933	64.933
532.357	0.64947	64.947
533.133	0.64961	64.961
533.909	0.64976	64.976
534.685	0.6499	64.99
535.46	0.65004	65.004
536.236	0.65018	65.018
537.012	0.65032	65.032
537.788	0.65045	65.045
538.564	0.65059	65.059
539.339	0.65073	65.073
540.115	0.65087	65.087
540.891	0.651	65.1
541.667	0.65114	65.114
542.442	0.65127	65.127
543.218	0.65141	65.141
543.994	0.65154	65.154
544.77	0.65167	65.167
545.546	0.65181	65.181
546.321	0.65194	65.194
547.097	0.65207	65.207
547.873	0.6522	65.22
548.649	0.65233	65.233
549.424	0.65246	65.246
550.2	0.65259	65.259
550.976	0.65272	65.272
551.752	0.65285	65.285
552.528	0.65298	65.298
553.303	0.65311	65.311
554.079	0.65324	65.324
554.855	0.65336	65.336
555.631	0.65349	65.349
556.406	0.65361	65.361
557.182	0.65374	65.374
557.958	0.65386	65.386
558.734	0.65399	65.399
559.51	0.65411	65.411
560.285	0.65424	65.424
561.061	0.65436	65.436
561.837	0.65448	65.448
562.613	0.6546	65.46
563.388	0.65472	65.472
564.164	0.65484	65.484
564.94	0.65496	65.496
565.716	0.65508	65.508
566.491	0.6552	65.52
567.267	0.65532	65.532
568.043	0.65544	65.544
568.819	0.65556	65.556
569.595	0.65568	65.568
570.37	0.65579	65.579
571.146	0.65591	65.591
571.922	0.65603	65.603
572.698	0.65614	65.614
573.473	0.65626	65.626
574.249	0.65637	65.637
575.025	0.65649	65.649
575.801	0.6566	65.66
576.577	0.65671	65.671
577.352	0.65683	65.683
578.128	0.65694	65.694
578.904	0.65705	65.705
579.68	0.65716	65.716
580.455	0.65728	65.728
581.231	0.65739	65.739
582.007	0.6575	65.75
582.783	0.65761	65.761
583.559	0.65772	65.772
584.334	0.65783	65.783
585.11	0.65793	65.793
585.886	0.65804	65.804
586.662	0.65815	65.815
587.437	0.65826	65.826
588.213	0.65837	65.837
588.989	0.65847	65.847
589.765	0.65858	65.858
590.541	0.65868	65.868
591.316	0.65879	65.879
592.092	0.65889	65.889
592.868	0.659	65.9
593.644	0.6591	65.91
594.419	0.65921	65.921
595.195	0.65931	65.931
595.971	0.65941	65.941
596.747	0.65952	65.952
597.523	0.65962	65.962
598.298	0.65972	65.972
599.074	0.65982	65.982
599.85	0.65992	65.992
600.626	0.66003	66.003
601.401	0.66013	66.013
602.177	0.66023	66.023
602.953	0.66033	66.033
603.729	0.66043	66.043
604.505	0.66052	66.052
605.28	0.66062	66.062
606.056	0.66072	66.072
606.832	0.66082	66.082
607.608	0.66092	66.092
608.383	0.66101	66.101
609.159	0.66111	66.111
609.935	0.66121	66.121
610.711	0.6613	66.13
611.486	0.6614	66.14
612.262	0.66149	66.149
613.038	0.66159	66.159
613.814	0.66168	66.168
614.59	0.66178	66.178
615.365	0.66187	66.187
616.141	0.66197	66.197
616.917	0.66206	66.206
617.693	0.66215	66.215
618.468	0.66225	66.225
619.244	0.66234	66.234
620.02	0.66243	66.243
620.796	0.66252	66.252
621.572	0.66261	66.261
622.347	0.6627	66.27
623.123	0.66279	66.279
623.899	0.66288	66.288
624.675	0.66297	66.297
625.45	0.66306	66.306
626.226	0.66315	66.315
627.002	0.66324	66.324
627.778	0.66333	66.333
628.554	0.66342	66.342
629.329	0.66351	66.351
630.105	0.6636	66.36
630.881	0.66368	66.368
631.657	0.66377	66.377
632.432	0.66386	66.386
633.208	0.66394	66.394
633.984	0.66403	66.403
634.76	0.66412	66.412
635.536	0.6642	66.42
636.311	0.66429	66.429
637.087	0.66437	66.437
637.863	0.66446	66.446
638.639	0.66454	66.454
639.414	0.66463	66.463
640.19	0.66471	66.471
640.966	0.66479	66.479
641.742	0.66488	66.488
642.518	0.66496	66.496
643.293	0.66504	66.504
644.069	0.66512	66.512
644.845	0.66521	66.521
645.621	0.66529	66.529
646.396	0.66537	66.537
647.172	0.66545	66.545
647.948	0.66553	66.553
648.724	0.66561	66.561
649.5	0.66569	66.569
650.275	0.66577	66.577
651.051	0.66585	66.585
651.827	0.66593	66.593
652.603	0.66601	66.601
653.378	0.66609	66.609
654.154	0.66617	66.617
654.93	0.66625	66.625
655.706	0.66632	66.632
656.481	0.6664	66.64
657.257	0.66648	66.648
658.033	0.66656	66.656
658.809	0.66663	66.663
659.585	0.66671	66.671
660.36	0.66679	66.679
661.136	0.66686	66.686
661.912	0.66694	66.694
662.688	0.66702	66.702
663.463	0.66709	66.709
664.239	0.66717	66.717
665.015	0.66724	66.724
665.791	0.66732	66.732
666.567	0.66739	66.739
667.342	0.66746	66.746
668.118	0.66754	66.754
668.894	0.66761	66.761
669.67	0.66769	66.769
670.445	0.66776	66.776
671.221	0.66783	66.783
671.997	0.6679	66.79
672.773	0.66798	66.798
673.549	0.66805	66.805
674.324	0.66812	66.812
675.1	0.66819	66.819
675.876	0.66826	66.826
676.652	0.66834	66.834
677.427	0.66841	66.841
678.203	0.66848	66.848
678.979	0.66855	66.855
679.755	0.66862	66.862
680.531	0.66869	66.869
681.306	0.66876	66.876
682.082	0.66883	66.883
682.858	0.6689	66.89
683.634	0.66897	66.897
684.409	0.66903	66.903
685.185	0.6691	66.91
685.961	0.66917	66.917
686.737	0.66924	66.924
687.513	0.66931	66.931
688.288	0.66938	66.938
689.064	0.66944	66.944
689.84	0.66951	66.951
690.616	0.66958	66.958
691.391	0.66964	66.964
692.167	0.66971	66.971
692.943	0.66978	66.978
693.719	0.66984	66.984
694.494	0.66991	66.991
695.27	0.66997	66.997
696.046	0.67004	67.004
696.822	0.67011	67.011
697.598	0.67017	67.017
698.373	0.67024	67.024
699.149	0.6703	67.03
699.925	0.67036	67.036
700.701	0.67043	67.043
701.476	0.67049	67.049
702.252	0.67056	67.056
703.028	0.67062	67.062
703.804	0.67068	67.068
704.58	0.67075	67.075
705.355	0.67081	67.081
706.131	0.67087	67.087
706.907	0.67094	67.094
707.683	0.671	67.1
708.458	0.67106	67.106
709.234	0.67112	67.112
710.01	0.67118	67.118
710.786	0.67125	67.125
711.562	0.67131	67.131
712.337	0.67137	67.137
713.113	0.67143	67.143
713.889	0.67149	67.149
714.665	0.67155	67.155
715.44	0.67161	67.161
716.216	0.67167	67.167
716.992	0.67173	67.173
717.768	0.67179	67.179
718.544	0.67185	67.185
719.319	0.67191	67.191
720.095	0.67197	67.197
720.871	0.67203	67.203
721.647	0.67209	67.209
722.422	0.67215	67.215
723.198	0.6722	67.22
723.974	0.67226	67.226
724.75	0.67232	67.232
725.526	0.67238	67.238
726.301	0.67244	67.244
727.077	0.67249	67.249
727.853	0.67255	67.255
728.629	0.67261	67.261
729.404	0.67267	67.267
730.18	0.67272	67.272
730.956	0.67278	67.278
731.732	0.67284	67.284
732.508	0.67289	67.289
733.283	0.67295	67.295
734.059	0.673	67.3
734.835	0.67306	67.306
735.611	0.67312	67.312
736.386	0.67317	67.317
737.162	0.67323	67.323
737.938	0.67328	67.328
738.714	0.67334	67.334
739.489	0.67339	67.339
740.265	0.67345	67.345
741.041	0.6735	67.35
741.817	0.67355	67.355
742.593	0.67361	67.361
743.368	0.67366	67.366
744.144	0.67372	67.372
744.92	0.67377	67.377
745.696	0.67382	67.382
746.471	0.67388	67.388
747.247	0.67393	67.393
748.023	0.67398	67.398
748.799	0.67404	67.404
749.575	0.67409	67.409
750.35	0.67414	67.414
751.126	0.67419	67.419
751.902	0.67424	67.424
752.678	0.6743	67.43
753.453	0.67435	67.435
754.229	0.6744	67.44
755.005	0.67445	67.445
755.781	0.6745	67.45
756.557	0.67455	67.455
757.332	0.6746	67.46
758.108	0.67466	67.466
758.884	0.67471	67.471
759.66	0.67476	67.476
760.435	0.67481	67.481
761.211	0.67486	67.486
761.987	0.67491	67.491
762.763	0.67496	67.496
763.539	0.67501	67.501
764.314	0.67506	67.506
765.09	0.67511	67.511
765.866	0.67516	67.516
766.642	0.6752	67.52
767.417	0.67525	67.525
768.193	0.6753	67.53
768.969	0.67535	67.535
769.745	0.6754	67.54
770.521	0.67545	67.545
771.296	0.6755	67.55
772.072	0.67554	67.554
772.848	0.67559	67.559
773.624	0.67564	67.564
774.399	0.67569	67.569
775.175	0.67574	67.574
775.951	0.67578	67.578
776.727	0.67583	67.583
777.503	0.67588	67.588
778.278	0.67593	67.593
779.054	0.67597	67.597
779.83	0.67602	67.602
780.606	0.67607	67.607
781.381	0.67611	67.611
782.157	0.67616	67.616
782.933	0.6762	67.62
783.709	0.67625	67.625
784.484	0.6763	67.63
785.26	0.67634	67.634
786.036	0.67639	67.639
786.812	0.67643	67.643
787.588	0.67648	67.648
788.363	0.67652	67.652
789.139	0.67657	67.657
789.915	0.67661	67.661
790.691	0.67666	67.666
791.466	0.6767	67.67
792.242	0.67675	67.675
793.018	0.67679	67.679
793.794	0.67684	67.684
794.57	0.67688	67.688
795.345	0.67692	67.692
796.121	0.67697	67.697
796.897	0.67701	67.701
797.673	0.67706	67.706
798.448	0.6771	67.71
799.224	0.67714	67.714
800	0.67719	67.719
