# Supplementary material for: Competitive binding of MatP and topoisomerase IV to the MukB hinge domain
Source: eLife. 2021 Sep 29;10:e70444. doi: 10.7554/eLife.70444 (PMC8523169; doi:10.7554/eLife.70444)
Supplement: Figure 3—figure supplement 1—source data 4. [file elife-70444-fig3-figsupp1-data4.xlsx]

## Sheet: Scans
Wavelength	LH	LH KKK
250	0.0385505	0.099413
249	0.0262919	0.00548062
248	-0.0834574	0.104842
247	-0.175107	0.0596802
246	-0.29701	-0.0491743
245	-0.4373	-0.0872348
244	-0.472937	-0.153277
243	-0.471476	-0.0931959
242	-0.590773	-0.185004
241	-1.03068	-0.35001
240	-1.30343	-0.466486
239	-1.54093	-0.630648
238	-1.92798	-0.886627
237	-2.38132	-1.04796
236	-2.90712	-1.12711
235	-3.68026	-1.47544
234	-4.48463	-1.90463
233	-5.23033	-2.31211
232	-6.15307	-2.7886
231	-7.13266	-3.15993
230	-7.92317	-3.37417
229	-8.81979	-3.73038
228	-9.86127	-4.11731
227	-10.6538	-4.49384
226	-10.996	-4.60484
225	-11.6993	-4.98943
224	-12.264	-5.17773
223	-12.4472	-5.20093
222	-12.7163	-5.55192
221	-12.9026	-5.56419
220	-12.9198	-5.46773
219	-13.0908	-5.75395
218	-12.9788	-5.54716
217	-12.6243	-5.30057
216	-12.4506	-5.21206
215	-12.2892	-5.1564
214	-12.0315	-5.13928
213	-11.8934	-5.01217
212	-12.1433	-5.22426
211	-12.3133	-5.39847
210	-12.3872	-5.47249
209	-12.3855	-5.30619
208	-12.5943	-5.71533
207	-12.0483	-5.72878
206	-10.5518	-4.91602
205	-8.77409	-4.12723
204	-6.41756	-2.89009
203	-4.02916	-2.19854
202	-1.39869	-1.0796
201	1.67048	0.747944
200	5.4622	1.93763
199	9.66189	4.21951
198	13.5313	6.49885
197	17.4688	7.20893
196	21.0229	9.84663
195	22.933	9.60707
194	23.4911	12.6408
193	23.9936	16.2131
192	23.0244	14.2822
191	22.9058	0.158466
190	24.3741	-3.87577
