# Supplementary material for: Competitive binding of MatP and topoisomerase IV to the MukB hinge domain
Source: eLife. 2021 Sep 29;10:e70444. doi: 10.7554/eLife.70444 (PMC8523169; doi:10.7554/eLife.70444)
Supplement: Figure 3—source data 3. [file elife-70444-fig3-data3.xlsx]

## Sheet: raw
Chrom.1				Chrom.1				Chrom.1				Chrom.1				Chrom.1
LH				MatPdelta18C				LH + MatPdelta18C				LH DDE-KKK				LH DDE-KKK + MatPdelta18C
ml	mAU	normalised mAU		ml	mAU	normalised mAU		ml	mAU	normalised mAU		ml	mAU	normalised mAU		ml	mAU	normalised mAU
0				0	0.013387	0.0128833		0	-0.008613	0.0584145		0	0.214022	0.0497982		0	0.082703	0.0772118
0.000832	-14.1626	0.00123571		0.000832	0.172701	0.0171138		0.000832	-0.135465	0.0502924		0.000832	2.25473	0.197723		0.000832	1.02087	0.141857
0.001664	-14.1709	0.000930308		0.001664	0.172402	0.0171058		0.001664	-0.137413	0.0501677		0.001665	2.23013	0.19594		0.001664	1.02058	0.141838
0.002496	-14.1794	0.000614058		0.002496	0.171987	0.0170948		0.002495	-0.139185	0.0500542		0.002497	2.20576	0.194173		0.002496	1.02061	0.14184
0.003328	-14.188	0.000297512		0.003328	0.171627	0.0170852		0.003327	-0.14028	0.0499841		0.003329	2.18113	0.192389		0.003328	1.02044	0.141828
0.00416	-14.196	0		0.00416	0.17202	0.0170957		0.004159	-0.141559	0.0499022		0.004161	2.15631	0.190589		0.00416	1.01953	0.141765
0.004992	-7.60962	0.243903		0.004992	0.171592	0.0170843		0.004991	-0.1483	0.0494706		0.004994	2.09005	0.185786		0.004992	0.534483	0.108342
0.005824	-0.01128	0.525282		0.005824	0.170696	0.0170605		0.005822	-0.156682	0.0489339		0.005826	2.04706	0.18267		0.005824	-0.000954	0.0714473
0.006656	-0.021336	0.52491		0.006656	0.074237	0.0144991		0.006654	-0.069404	0.0545222		0.006658	0.685907	0.0840038		0.006656	-0.000684	0.0714659
0.007488	-0.023294	0.524837		0.007488	0.001017	0.0125548		0.007486	-0.001263	0.0588851		0.00749	-0.000333	0.0342602		0.007488	-0.002687	0.0713278
0.008319	-0.022612	0.524863		0.00832	0.00062	0.0125443		0.008318	-0.001929	0.0588425		0.008323	-0.000232	0.0342675		0.00832	-0.00322	0.0712911
0.009151	-0.02232	0.524873		0.009152	-0.000391	0.0125174		0.00915	-0.002956	0.0587767		0.009155	-0.000862	0.0342219		0.009152	-0.004326	0.0712149
0.009983	-0.021664	0.524898		0.009984	-0.000704	0.0125091		0.009981	-0.004012	0.0587091		0.009987	-0.001407	0.0341823		0.009984	-0.005246	0.0711515
0.010815	-0.020939	0.524924		0.010816	-0.000835	0.0125057		0.010813	-0.00593	0.0585863		0.01082	-0.001551	0.0341719		0.010816	-0.00541	0.0711402
0.011647	-0.022193	0.524878		0.011648	-0.000874	0.0125046		0.011645	-0.007271	0.0585005		0.011652	-0.001695	0.0341615		0.011648	-0.006675	0.0710531
0.012479	-0.023557	0.524828		0.01248	-0.001314	0.0124929		0.012477	-0.008389	0.0584289		0.012484	-0.001309	0.0341895		0.01248	-0.007505	0.0709959
0.013311	-0.024504	0.524792		0.013312	-0.00181	0.0124798		0.013309	-0.010041	0.0583231		0.013316	-0.001744	0.0341579		0.013311	-0.007842	0.0709726
0.014143	-0.024467	0.524794		0.014144	-0.00252	0.0124609		0.01414	-0.0108	0.0582745		0.014149	-0.001767	0.0341563		0.014143	-0.008218	0.0709467
0.014975	-0.024177	0.524805		0.014976	-0.002491	0.0124617		0.014972	-0.011794	0.0582109		0.014981	-0.000555	0.0342441		0.014975	-0.008906	0.0708993
0.015807	-0.023788	0.524819		0.015808	-0.002168	0.0124703		0.015804	-0.013631	0.0580932		0.015813	-0.000706	0.0342332		0.015807	-0.009587	0.0708524
0.016639	-0.023049	0.524846		0.01664	-0.002514	0.0124611		0.016636	-0.015196	0.057993		0.016645	-0.001381	0.0341842		0.016639	-0.010327	0.0708014
0.017471	-0.021891	0.524889		0.017472	-0.001907	0.0124772		0.017467	-0.016768	0.0578924		0.017478	-0.002328	0.0341156		0.017471	-0.011628	0.0707118
0.018303	-0.020404	0.524944		0.018304	-0.001728	0.0124819		0.018299	-0.019015	0.0577485		0.01831	-0.003067	0.034062		0.018303	-0.01298	0.0706186
0.019135	-0.019305	0.524985		0.019136	-0.002215	0.012469		0.019131	-0.021755	0.0575731		0.019142	-0.003119	0.0340582		0.019135	-0.013285	0.0705976
0.019967	-0.018625	0.52501		0.019968	-0.002811	0.0124532		0.019963	-0.023653	0.0574516		0.019975	-0.003199	0.0340524		0.019967	-0.013609	0.0705753
0.020799	-0.017717	0.525044		0.0208	-0.003467	0.0124358		0.020795	-0.026172	0.0572903		0.020807	-0.003148	0.0340561		0.020799	-0.01523	0.0704636
0.021631	-0.016574	0.525086		0.021632	-0.00445	0.0124097		0.021626	-0.029204	0.0570961		0.021639	-0.002972	0.0340689		0.021631	-0.017375	0.0703158
0.022463	-0.015509	0.525126		0.022464	-0.004574	0.0124064		0.022458	-0.032206	0.0569039		0.022471	-0.002496	0.0341034		0.022463	-0.018413	0.0702442
0.023294	-0.014525	0.525162		0.023296	-0.005102	0.0123924		0.02329	-0.034594	0.056751		0.023304	-0.003681	0.0340175		0.023295	-0.0203	0.0701142
0.024126	-0.013669	0.525194		0.024128	-0.006241	0.0123621		0.024122	-0.036513	0.0566281		0.024136	-0.004419	0.033964		0.024127	-0.022677	0.0699504
0.024958	-0.011977	0.525256		0.02496	-0.007257	0.0123351		0.024953	-0.038593	0.056495		0.024968	-0.005345	0.0338969		0.024959	-0.024506	0.0698244
0.02579	-0.011018	0.525292		0.025792	-0.008611	0.0122992		0.025785	-0.040885	0.0563482		0.0258	-0.005492	0.0338862		0.025791	-0.024845	0.069801
0.026622	-0.010889	0.525297		0.026624	-0.009475	0.0122762		0.026617	-0.043375	0.0561888		0.026633	-0.00693	0.033782		0.026623	-0.024757	0.0698071
0.027454	-0.009867	0.525334		0.027456	-0.009939	0.0122639		0.027449	-0.045976	0.0560222		0.027465	-0.009522	0.0335941		0.027455	-0.025912	0.0697275
0.028286	-0.009745	0.525339		0.028288	-0.010509	0.0122488		0.028281	-0.048462	0.0558631		0.028297	-0.01094	0.0334913		0.028287	-0.027486	0.069619
0.029118	-0.009839	0.525336		0.02912	-0.009291	0.0122811		0.029112	-0.051294	0.0556817		0.02913	-0.012249	0.0333964		0.029119	-0.028822	0.069527
0.02995	-0.010026	0.525329		0.029952	-0.009095	0.0122863		0.029944	-0.053882	0.055516		0.029962	-0.012752	0.03336		0.029951	-0.029131	0.0695057
0.030782	-0.008592	0.525382		0.030784	-0.01142	0.0122246		0.030776	-0.056107	0.0553736		0.030794	-0.013923	0.0332751		0.030783	-0.029257	0.069497
0.031614	-0.006707	0.525451		0.031616	-0.012857	0.0121864		0.031608	-0.058034	0.0552502		0.031626	-0.015025	0.0331952		0.031615	-0.029106	0.0695074
0.032446	-0.004358	0.525538		0.032448	-0.012861	0.0121863		0.032439	-0.059859	0.0551333		0.032459	-0.016491	0.033089		0.032447	-0.028569	0.0695444
0.033278	-0.002361	0.525612		0.03328	-0.012554	0.0121945		0.033271	-0.061213	0.0550466		0.033291	-0.017794	0.0329945		0.033279	-0.029384	0.0694883
0.03411	-0.001514	0.525644		0.034112	-0.012607	0.0121931		0.034103	-0.06329	0.0549137		0.034123	-0.018863	0.032917		0.034111	-0.030389	0.069419
0.034942	-0.00019	0.525693		0.034944	-0.012974	0.0121833		0.034935	-0.066303	0.0547207		0.034955	-0.020578	0.0327927		0.034943	-0.030372	0.0694202
0.035774	0.000189	0.525707		0.035776	-0.013074	0.0121807		0.035767	-0.067579	0.054639		0.035788	-0.022902	0.0326242		0.035775	-0.030576	0.0694061
0.036606	0.000968	0.525736		0.036608	-0.01331	0.0121744		0.036598	-0.069259	0.0545315		0.03662	-0.024574	0.032503		0.036607	-0.030893	0.0693843
0.037438	0.002536	0.525794		0.03744	-0.0147	0.0121375		0.03743	-0.072189	0.0543439		0.037452	-0.025312	0.0324495		0.037439	-0.031646	0.0693324
0.03827	0.003792	0.52584		0.038272	-0.016399	0.0120924		0.038262	-0.074408	0.0542018		0.038285	-0.026434	0.0323682		0.03827	-0.032303	0.0692871
0.039101	0.003653	0.525835		0.039104	-0.017455	0.0120643		0.039094	-0.076024	0.0540983		0.039117	-0.028026	0.0322528		0.039102	-0.033076	0.0692338
0.039933	0.004301	0.525859		0.039936	-0.017483	0.0120636		0.039926	-0.076834	0.0540465		0.039949	-0.030384	0.0320819		0.039934	-0.034579	0.0691303
0.040765	0.004534	0.525868		0.040768	-0.017414	0.0120654		0.040757	-0.078582	0.0539345		0.040781	-0.033107	0.0318845		0.040766	-0.034918	0.0691069
0.041597	0.004564	0.525869		0.0416	-0.016477	0.0120903		0.041589	-0.08085	0.0537893		0.041614	-0.034758	0.0317648		0.041598	-0.035255	0.0690837
0.042429	0.005924	0.525919		0.042433	-0.014683	0.0121379		0.042421	-0.083445	0.0536232		0.042446	-0.036616	0.0316301		0.04243	-0.036274	0.0690135
0.043261	0.011959	0.526143		0.043265	-0.012334	0.0122003		0.043253	-0.08663	0.0534192		0.043278	-0.035279	0.0317271		0.043262	-0.038236	0.0688783
0.044093	0.027504	0.526718		0.044097	-0.010099	0.0122597		0.044084	-0.090972	0.0531412		0.04411	-0.028432	0.0322234		0.044094	-0.041001	0.0686878
0.044925	0.055277	0.527747		0.044929	-0.008312	0.0123071		0.044916	-0.095035	0.0528811		0.044943	-0.019277	0.032887		0.044926	-0.042788	0.0685646
0.045757	0.099104	0.52937		0.045761	-0.005052	0.0123937		0.045748	-0.097922	0.0526962		0.045775	-0.011814	0.033428		0.045758	-0.043912	0.0684872
0.046589	0.150121	0.531259		0.046593	-0.003332	0.0124394		0.04658	-0.101445	0.0524707		0.046607	-0.007225	0.0337606		0.04659	-0.046318	0.0683214
0.047421	0.185111	0.532555		0.047425	-0.003885	0.0124247		0.047412	-0.103764	0.0523222		0.04744	-0.00507	0.0339168		0.047422	-0.048527	0.0681692
0.048253	0.20858	0.533424		0.048257	-0.004746	0.0124018		0.048243	-0.106121	0.0521713		0.048272	-0.003761	0.0340117		0.048254	-0.050048	0.0680644
0.049085	0.226196	0.534076		0.049089	-0.007045	0.0123408		0.049075	-0.109444	0.0519585		0.049104	-0.00554	0.0338828		0.049086	-0.051583	0.0679586
0.049917	0.237762	0.534505		0.049921	-0.009661	0.0122713		0.049907	-0.112672	0.0517518		0.049936	-0.008247	0.0336865		0.049918	-0.053354	0.0678366
0.050749	0.242879	0.534694		0.050753	-0.010931	0.0122376		0.050739	-0.115164	0.0515923		0.050769	-0.012767	0.0333589		0.05075	-0.055589	0.0676826
0.051581	0.242519	0.534681		0.051585	-0.011067	0.012234		0.05157	-0.117251	0.0514586		0.051601	-0.017568	0.0330109		0.051582	-0.056429	0.0676247
0.052413	0.240615	0.53461		0.052417	-0.01174	0.0122161		0.052402	-0.118053	0.0514073		0.052433	-0.02189	0.0326976		0.052414	-0.0575	0.0675509
0.053245	0.235704	0.534428		0.053249	-0.012659	0.0121917		0.053234	-0.119522	0.0513132		0.053265	-0.025779	0.0324157		0.053246	-0.058435	0.0674864
0.054076	0.228323	0.534155		0.054081	-0.013771	0.0121622		0.054066	-0.121681	0.051175		0.054098	-0.029947	0.0321136		0.054078	-0.058871	0.0674564
0.054908	0.220971	0.533883		0.054913	-0.015188	0.0121245		0.054898	-0.123224	0.0510762		0.05493	-0.035079	0.0317416		0.05491	-0.059422	0.0674184
0.05574	0.212712	0.533577		0.055745	-0.016326	0.0120943		0.055729	-0.124081	0.0510213		0.055762	-0.040766	0.0313293		0.055742	-0.061562	0.067271
0.056572	0.203403	0.533232		0.056577	-0.01818	0.0120451		0.056561	-0.125742	0.050915		0.056595	-0.046336	0.0309256		0.056574	-0.063468	0.0671396
0.057404	0.194828	0.532915		0.057409	-0.01965	0.012006		0.057393	-0.126572	0.0508618		0.057427	-0.051001	0.0305874		0.057406	-0.064409	0.0670748
0.058236	0.186397	0.532602		0.058241	-0.019829	0.0120013		0.058225	-0.126576	0.0508616		0.058259	-0.05532	0.0302743		0.058238	-0.064938	0.0670383
0.059068	0.178235	0.5323		0.059073	-0.019964	0.0119977		0.059057	-0.127827	0.0507815		0.059091	-0.059605	0.0299637		0.05907	-0.065594	0.0669931
0.0599	0.171185	0.532039		0.059905	-0.019999	0.0119968		0.059888	-0.130433	0.0506146		0.059924	-0.063518	0.0296801		0.059902	-0.065784	0.0669801
0.060732	0.164347	0.531786		0.060737	-0.021048	0.0119689		0.06072	-0.132135	0.0505056		0.060756	-0.067163	0.0294159		0.060734	-0.065452	0.0670029
0.061564	0.158513	0.53157		0.061569	-0.022581	0.0119282		0.061552	-0.133025	0.0504486		0.061588	-0.07103	0.0291356		0.061566	-0.064821	0.0670464
0.062396	0.153045	0.531367		0.062401	-0.023701	0.0118985		0.062384	-0.133016	0.0504492		0.06242	-0.075187	0.0288342		0.062398	-0.063479	0.0671389
0.063228	0.147031	0.531145		0.063233	-0.025773	0.0118435		0.063215	-0.132351	0.0504918		0.063253	-0.07914	0.0285477		0.063229	-0.06222	0.0672256
0.06406	0.137778	0.530802		0.064065	-0.028474	0.0117717		0.064047	-0.131072	0.0505737		0.064085	-0.08445	0.0281628		0.064061	-0.060692	0.0673309
0.064892	0.121104	0.530185		0.064897	-0.031809	0.0116832		0.064879	-0.129542	0.0506717		0.064917	-0.094381	0.0274429		0.064893	-0.058035	0.067514
0.065724	0.094109	0.529185		0.065729	-0.033008	0.0116513		0.065711	-0.128771	0.050721		0.06575	-0.106977	0.0265299		0.065725	-0.055506	0.0676883
0.066556	0.05253	0.527645		0.066561	-0.033565	0.0116365		0.066543	-0.128732	0.0507235		0.066582	-0.118592	0.0256879		0.066557	-0.05403	0.06779
0.067388	0.001803	0.525767		0.067393	-0.035985	0.0115723		0.067374	-0.127864	0.0507791		0.067414	-0.127394	0.0250499		0.067389	-0.052465	0.0678978
0.06822	-0.038717	0.524266		0.068225	-0.037436	0.0115337		0.068206	-0.128205	0.0507573		0.068246	-0.133504	0.024607		0.068221	-0.051868	0.067939
0.069052	-0.065322	0.523281		0.069057	-0.038259	0.0115119		0.069038	-0.127873	0.0507785		0.069079	-0.137813	0.0242947		0.069053	-0.051483	0.0679655
0.069883	-0.084327	0.522577		0.069889	-0.038612	0.0115025		0.06987	-0.127094	0.0508284		0.069911	-0.139762	0.0241534		0.069885	-0.050392	0.0680407
0.070715	-0.09743	0.522092		0.070721	-0.038083	0.0115166		0.070701	-0.126817	0.0508461		0.070743	-0.140787	0.0240791		0.070717	-0.050038	0.0680651
0.071547	-0.104662	0.521824		0.071553	-0.038199	0.0115135		0.071533	-0.125973	0.0509002		0.071575	-0.140952	0.0240671		0.071549	-0.04879	0.0681511
0.072379	-0.106405	0.52176		0.072385	-0.038267	0.0115117		0.072365	-0.126419	0.0508716		0.072408	-0.138861	0.0242187		0.072381	-0.048206	0.0681913
0.073211	-0.105146	0.521806		0.073217	-0.037269	0.0115382		0.073197	-0.128386	0.0507457		0.07324	-0.136621	0.0243811		0.073213	-0.047074	0.0682693
0.074043	-0.100116	0.521992		0.074049	-0.037038	0.0115443		0.074029	-0.129082	0.0507011		0.074072	-0.134729	0.0245182		0.074045	-0.043702	0.0685016
0.074875	-0.092806	0.522263		0.074881	-0.037791	0.0115243		0.07486	-0.128872	0.0507146		0.074905	-0.132883	0.024652		0.074877	-0.034585	0.0691299
0.075707	-0.084654	0.522565		0.075713	-0.038053	0.0115174		0.075692	-0.128917	0.0507117		0.075737	-0.130149	0.0248502		0.075709	-0.029893	0.0694532
0.076539	-0.07516	0.522917		0.076545	-0.03828	0.0115113		0.076524	-0.129616	0.0506669		0.076569	-0.126418	0.0251207		0.076541	-0.028634	0.0695399
0.077371	-0.064584	0.523308		0.077377	-0.038566	0.0115037		0.077356	-0.130839	0.0505886		0.077401	-0.123314	0.0253457		0.077373	-0.026425	0.0696921
0.078203	-0.054045	0.523698		0.078209	-0.038711	0.0114999		0.078187	-0.132969	0.0504522		0.078234	-0.120597	0.0255426		0.078205	-0.026129	0.0697125
0.079035	-0.043729	0.524081		0.079041	-0.038189	0.0115138		0.079019	-0.134308	0.0503665		0.079066	-0.119303	0.0256364		0.079037	-0.026053	0.0697178
0.079867	-0.033496	0.524459		0.079873	-0.037079	0.0115432		0.079851	-0.13445	0.0503574		0.079898	-0.117945	0.0257348		0.079869	-0.025362	0.0697654
0.080699	-0.022747	0.524858		0.080705	-0.037154	0.0115412		0.080683	-0.134968	0.0503242		0.08073	-0.116028	0.0258738		0.080701	-0.025137	0.0697809
0.081531	-0.012313	0.525244		0.081537	-0.037229	0.0115392		0.081515	-0.136591	0.0502203		0.081563	-0.114913	0.0259546		0.081533	-0.024931	0.0697951
0.082363	-0.0028	0.525596		0.082369	-0.036703	0.0115532		0.082346	-0.137922	0.0501351		0.082395	-0.112521	0.026128		0.082365	-0.025464	0.0697584
0.083195	0.00576	0.525913		0.083201	-0.035954	0.0115731		0.083178	-0.138983	0.0500672		0.083227	-0.11005	0.0263071		0.083197	-0.026586	0.0696811
0.084027	0.013924	0.526215		0.084033	-0.034934	0.0116002		0.08401	-0.14006	0.0499982		0.08406	-0.10751	0.0264912		0.084029	-0.028015	0.0695826
0.084858	0.021593	0.526499		0.084865	-0.035113	0.0115954		0.084842	-0.140264	0.0499851		0.084892	-0.106109	0.0265928		0.084861	-0.029383	0.0694883
0.08569	0.029311	0.526785		0.085697	-0.035299	0.0115905		0.085674	-0.140374	0.0499781		0.085724	-0.103574	0.0267765		0.085693	-0.031022	0.0693754
0.086522	0.036543	0.527053		0.086529	-0.037057	0.0115438		0.086505	-0.14091	0.0499438		0.086556	-0.101181	0.02695		0.086525	-0.033159	0.0692281
0.087354	0.043231	0.527301		0.087361	-0.039932	0.0114675		0.087337	-0.14166	0.0498958		0.087389	-0.099121	0.0270993		0.087357	-0.034004	0.0691699
0.088186	0.048843	0.527509		0.088193	-0.040448	0.0114538		0.088169	-0.141549	0.0499029		0.088221	-0.097877	0.0271895		0.088188	-0.034368	0.0691448
0.089018	0.054717	0.527726		0.089025	-0.039709	0.0114734		0.089001	-0.142295	0.0498551		0.089053	-0.097127	0.0272439		0.08902	-0.034495	0.0691361
0.08985	0.061182	0.527966		0.089857	-0.038599	0.0115029		0.089832	-0.144257	0.0497295		0.089885	-0.095886	0.0273338		0.089852	-0.034237	0.0691538
0.090682	0.06739	0.528195		0.090689	-0.037823	0.0115235		0.090664	-0.145298	0.0496628		0.090718	-0.094313	0.0274479		0.090684	-0.034644	0.0691258
0.091514	0.072958	0.528402		0.091521	-0.037885	0.0115218		0.091496	-0.14652	0.0495846		0.09155	-0.091831	0.0276278		0.091516	-0.034256	0.0691525
0.092346	0.079097	0.528629		0.092353	-0.038137	0.0115151		0.092328	-0.149189	0.0494137		0.092382	-0.08923	0.0278163		0.092348	-0.033854	0.0691802
0.093178	0.085205	0.528855		0.093185	-0.037741	0.0115257		0.09316	-0.150835	0.0493083		0.093215	-0.088123	0.0278965		0.09318	-0.034781	0.0691164
0.09401	0.09159	0.529092		0.094017	-0.038237	0.0115125		0.093991	-0.151798	0.0492466		0.094047	-0.087103	0.0279705		0.094012	-0.036353	0.069008
0.094842	0.097209	0.5293		0.094849	-0.038835	0.0114966		0.094823	-0.152777	0.049184		0.094879	-0.085096	0.028116		0.094844	-0.040786	0.0687026
0.095674	0.102406	0.529492		0.095681	-0.038728	0.0114994		0.095655	-0.154116	0.0490982		0.095711	-0.083532	0.0282293		0.095676	-0.04954	0.0680994
0.096506	0.107501	0.529681		0.096513	-0.038225	0.0115128		0.096487	-0.154757	0.0490572		0.096544	-0.082419	0.02831		0.096508	-0.054521	0.0677561
0.097338	0.112399	0.529862		0.097345	-0.03743	0.0115339		0.097318	-0.154271	0.0490883		0.097376	-0.081396	0.0283842		0.09734	-0.055518	0.0676874
0.09817	0.117795	0.530062		0.098177	-0.036317	0.0115635		0.09815	-0.153709	0.0491243		0.098208	-0.079512	0.0285207		0.098172	-0.057035	0.0675829
0.099002	0.122961	0.530253		0.099009	-0.034646	0.0116078		0.098982	-0.153665	0.0491271		0.09904	-0.079959	0.0284883		0.099004	-0.057186	0.0675725
0.099833	0.129844	0.530508		0.099841	-0.033026	0.0116509		0.099814	-0.154199	0.0490929		0.099873	-0.078763	0.028575		0.099836	-0.057659	0.0675399
0.100665	0.136599	0.530758		0.100673	-0.032032	0.0116772		0.100646	-0.155925	0.0489824		0.100705	-0.077225	0.0286865		0.100668	-0.058534	0.0674796
0.101497	0.140919	0.530918		0.101505	-0.030758	0.0117111		0.101477	-0.156225	0.0489632		0.101537	-0.075802	0.0287897		0.1015	-0.058819	0.06746
0.102329	0.145436	0.531086		0.102337	-0.029205	0.0117523		0.102309	-0.155967	0.0489797		0.10237	-0.073833	0.0289324		0.102332	-0.059143	0.0674377
0.103161	0.149878	0.53125		0.103169	-0.027734	0.0117914		0.103141	-0.155565	0.0490055		0.103202	-0.073038	0.02899		0.103164	-0.059603	0.067406
0.103993	0.155204	0.531447		0.104001	-0.027441	0.0117992		0.103973	-0.156274	0.0489601		0.104034	-0.073404	0.0289635		0.103996	-0.059153	0.067437
0.104825	0.160262	0.531635		0.104833	-0.027648	0.0117937		0.104805	-0.15558	0.0490045		0.104866	-0.073344	0.0289678		0.104828	-0.058107	0.067509
0.105657	0.165355	0.531823		0.105665	-0.027368	0.0118011		0.105636	-0.156792	0.0489269		0.105699	-0.07259	0.0290225		0.10566	-0.057666	0.0675394
0.106489	0.170999	0.532032		0.106497	-0.026271	0.0118302		0.106468	-0.157547	0.0488785		0.106531	-0.072459	0.029032		0.106492	-0.057037	0.0675828
0.107321	0.176309	0.532229		0.107329	-0.024579	0.0118752		0.1073	-0.158156	0.0488396		0.107363	-0.072669	0.0290168		0.107324	-0.055802	0.0676679
0.108153	0.181746	0.53243		0.108161	-0.023032	0.0119162		0.108132	-0.158795	0.0487986		0.108195	-0.072564	0.0290244		0.108156	-0.055475	0.0676904
0.108985	0.187101	0.532629		0.108993	-0.022021	0.0119431		0.108963	-0.160743	0.0486739		0.109028	-0.071877	0.0290742		0.108988	-0.055182	0.0677106
0.109817	0.192255	0.532819		0.109825	-0.020557	0.011982		0.109795	-0.161418	0.0486307		0.10986	-0.070868	0.0291473		0.10982	-0.055163	0.0677119
0.110649	0.196824	0.532989		0.110657	-0.019682	0.0120052		0.110627	-0.161087	0.0486519		0.110692	-0.069961	0.0292131		0.110652	-0.055236	0.0677069
0.111481	0.201261	0.533153		0.111489	-0.018988	0.0120236		0.111459	-0.161209	0.0486441		0.111525	-0.07012	0.0292015		0.111484	-0.054703	0.0677436
0.112313	0.206127	0.533333		0.112321	-0.018883	0.0120264		0.112291	-0.160835	0.048668		0.112357	-0.070481	0.0291754		0.112316	-0.053565	0.067822
0.113145	0.210805	0.533506		0.113153	-0.017393	0.012066		0.113122	-0.160957	0.0486602		0.113189	-0.070717	0.0291583		0.113148	-0.052324	0.0679075
0.113977	0.21475	0.533652		0.113985	-0.015169	0.012125		0.113954	-0.161344	0.0486354		0.114021	-0.070693	0.02916		0.113979	-0.051345	0.067975
0.114809	0.218979	0.533809		0.114817	-0.013924	0.0121581		0.114786	-0.160918	0.0486627		0.114854	-0.070254	0.0291918		0.114811	-0.050973	0.0680006
0.11564	0.223024	0.533959		0.115649	-0.012728	0.0121898		0.115618	-0.160799	0.0486703		0.115686	-0.07088	0.0291464		0.115643	-0.0511	0.0679919
0.116472	0.227512	0.534125		0.116481	-0.010546	0.0122478		0.116449	-0.160681	0.0486779		0.116518	-0.071252	0.0291195		0.116475	-0.051334	0.0679758
0.117304	0.23259	0.534313		0.117313	-0.008339	0.0123064		0.117281	-0.160716	0.0486756		0.11735	-0.071197	0.0291235		0.117307	-0.051262	0.0679807
0.118136	0.237984	0.534513		0.118145	-0.007313	0.0123336		0.118113	-0.162294	0.0485746		0.118183	-0.071065	0.029133		0.118139	-0.051523	0.0679627
0.118968	0.242789	0.534691		0.118977	-0.006971	0.0123427		0.118945	-0.163182	0.0485177		0.119015	-0.071088	0.0291314		0.118971	-0.051141	0.0679891
0.1198	0.246957	0.534845		0.119809	-0.006386	0.0123583		0.119777	-0.163566	0.0484932		0.119847	-0.070137	0.0292003		0.119803	-0.050013	0.0680668
0.120632	0.249646	0.534945		0.120641	-0.005915	0.0123708		0.120608	-0.163169	0.0485186		0.12068	-0.069422	0.0292521		0.120635	-0.047858	0.0682153
0.121464	0.252104	0.535036		0.121473	-0.005248	0.0123885		0.12144	-0.16238	0.0485691		0.121512	-0.069255	0.0292642		0.121467	-0.04628	0.068324
0.122296	0.256749	0.535208		0.122305	-0.005023	0.0123944		0.122272	-0.162129	0.0485852		0.122344	-0.069292	0.0292616		0.122299	-0.045819	0.0683558
0.123128	0.260748	0.535356		0.123137	-0.004767	0.0124012		0.123104	-0.16178	0.0486075		0.123176	-0.068926	0.0292881		0.123131	-0.044935	0.0684167
0.12396	0.264136	0.535481		0.123969	-0.004728	0.0124023		0.123935	-0.161654	0.0486156		0.124009	-0.068301	0.0293334		0.123963	-0.043752	0.0684982
0.124792	0.267388	0.535602		0.124801	-0.003629	0.0124315		0.124767	-0.161274	0.0486399		0.124841	-0.066556	0.0294599		0.124795	-0.043518	0.0685143
0.125624	0.270894	0.535732		0.125633	-0.002154	0.0124706		0.125599	-0.161052	0.0486541		0.125673	-0.064993	0.0295732		0.125627	-0.043959	0.0684839
0.126456	0.273855	0.535841		0.126465	-0.000938	0.0125029		0.126431	-0.159834	0.0487321		0.126505	-0.065052	0.0295689		0.126459	-0.043112	0.0685423
0.127288	0.276402	0.535935		0.127298	0.000257	0.0125347		0.127263	-0.15936	0.0487625		0.127338	-0.064453	0.0296123		0.127291	-0.042581	0.0685789
0.12812	0.279752	0.53606		0.12813	0.001216	0.0125601		0.128094	-0.158719	0.0488035		0.12817	-0.06345	0.029685		0.128123	-0.04201	0.0686182
0.128952	0.283251	0.536189		0.128962	0.002146	0.0125848		0.128926	-0.157362	0.0488904		0.129002	-0.06237	0.0297633		0.128955	-0.041358	0.0686632
0.129784	0.287275	0.536338		0.129794	0.002775	0.0126015		0.129758	-0.156064	0.0489735		0.129835	-0.062537	0.0297512		0.129787	-0.041756	0.0686357
0.130615	0.291562	0.536497		0.130626	0.00323	0.0126136		0.13059	-0.155172	0.0490306		0.130667	-0.062991	0.0297183		0.130619	-0.041642	0.0686436
0.131447	0.295616	0.536647		0.131458	0.004127	0.0126374		0.131422	-0.15516	0.0490314		0.131499	-0.063614	0.0296731		0.131451	-0.040885	0.0686958
0.132279	0.300001	0.536809		0.13229	0.006229	0.0126932		0.132253	-0.155819	0.0489892		0.132331	-0.063316	0.0296947		0.132283	-0.039358	0.068801
0.133111	0.304076	0.53696		0.133122	0.008562	0.0127552		0.133085	-0.15547	0.0490115		0.133164	-0.062629	0.0297445		0.133115	-0.039938	0.068761
0.133943	0.30791	0.537102		0.133954	0.009791	0.0127878		0.133917	-0.154044	0.0491028		0.133996	-0.061658	0.0298149		0.133947	-0.041039	0.0686851
0.134775	0.312432	0.53727		0.134786	0.010875	0.0128166		0.134749	-0.153484	0.0491387		0.134828	-0.061313	0.0298399		0.134779	-0.041328	0.0686652
0.135607	0.315994	0.537402		0.135618	0.012975	0.0128724		0.13558	-0.153419	0.0491429		0.13566	-0.061345	0.0298376		0.135611	-0.040318	0.0687348
0.136439	0.320195	0.537557		0.13645	0.01424	0.012906		0.136412	-0.153677	0.0491263		0.136493	-0.061051	0.0298589		0.136443	-0.039757	0.0687735
0.137271	0.324876	0.537731		0.137282	0.01501	0.0129264		0.137244	-0.153891	0.0491126		0.137325	-0.061061	0.0298582		0.137275	-0.039187	0.0688128
0.138103	0.32894	0.537881		0.138114	0.015525	0.0129401		0.138076	-0.153743	0.0491221		0.138157	-0.060615	0.0298905		0.138107	-0.038946	0.0688294
0.138935	0.332424	0.53801		0.138946	0.017479	0.012992		0.138908	-0.152924	0.0491746		0.13899	-0.060164	0.0299232		0.138938	-0.038109	0.068887
0.139767	0.335952	0.538141		0.139778	0.019652	0.0130497		0.139739	-0.152497	0.0492019		0.139822	-0.05916	0.029996		0.13977	-0.037031	0.0689613
0.140599	0.339281	0.538264		0.14061	0.019759	0.0130525		0.140571	-0.151867	0.0492422		0.140654	-0.057605	0.0301087		0.140602	-0.037177	0.0689513
0.141431	0.342502	0.538383		0.141442	0.019745	0.0130521		0.141403	-0.1517	0.0492529		0.141486	-0.056178	0.0302122		0.141434	-0.038034	0.0688922
0.142263	0.346597	0.538535		0.142274	0.020571	0.0130741		0.142235	-0.151695	0.0492532		0.142319	-0.055983	0.0302263		0.142266	-0.038394	0.0688674
0.143095	0.350819	0.538691		0.143106	0.022091	0.0131144		0.143066	-0.151512	0.049265		0.143151	-0.056057	0.0302209		0.143098	-0.037638	0.0689195
0.143927	0.354963	0.538845		0.143938	0.023187	0.0131435		0.143898	-0.151941	0.0492375		0.143983	-0.055889	0.0302331		0.14393	-0.037409	0.0689353
0.144759	0.358928	0.538992		0.14477	0.024248	0.0131717		0.14473	-0.151622	0.0492579		0.144815	-0.055058	0.0302933		0.144762	-0.03707	0.0689586
0.145591	0.363392	0.539157		0.145602	0.029487	0.0133108		0.145562	-0.150376	0.0493377		0.145648	-0.055177	0.0302847		0.145594	-0.03648	0.0689993
0.146422	0.368221	0.539336		0.146434	0.036967	0.0135095		0.146394	-0.149771	0.0493764		0.14648	-0.054764	0.0303146		0.146426	-0.036236	0.0690161
0.147254	0.373636	0.539536		0.147266	0.039273	0.0135707		0.147225	-0.149978	0.0493632		0.147312	-0.052553	0.0304749		0.147258	-0.036366	0.0690071
0.148086	0.378404	0.539713		0.148098	0.039712	0.0135824		0.148057	-0.149469	0.0493958		0.148145	-0.050998	0.0305876		0.14809	-0.035176	0.0690891
0.148918	0.383023	0.539884		0.14893	0.040176	0.0135947		0.148889	-0.14851	0.0494572		0.148977	-0.049255	0.030714		0.148922	-0.034933	0.0691059
0.14975	0.387627	0.540054		0.149762	0.04074	0.0136096		0.149721	-0.148273	0.0494723		0.149809	-0.048154	0.0307938		0.149754	-0.034281	0.0691508
0.150582	0.39226	0.540226		0.150594	0.042498	0.0136563		0.150553	-0.148639	0.0494489		0.150641	-0.046176	0.0309372		0.150586	-0.033694	0.0691913
0.151414	0.397069	0.540404		0.151426	0.044723	0.0137154		0.151384	-0.147699	0.0495091		0.151474	-0.044471	0.0310608		0.151418	-0.032074	0.0693029
0.152246	0.402572	0.540608		0.152258	0.046224	0.0137553		0.152216	-0.14667	0.049575		0.152306	-0.04144	0.0312805		0.15225	-0.031243	0.0693602
0.153078	0.408375	0.540823		0.15309	0.04756	0.0137907		0.153048	-0.144455	0.0497168		0.153138	-0.038281	0.0315095		0.153082	-0.030969	0.069379
0.15391	0.414593	0.541053		0.153922	0.049149	0.0138329		0.15388	-0.143226	0.0497955		0.15397	-0.035929	0.0316799		0.153914	-0.028827	0.0695266
0.154742	0.420981	0.541289		0.154754	0.050914	0.0138798		0.154711	-0.140966	0.0499402		0.154803	-0.033231	0.0318755		0.154746	-0.026627	0.0696782
0.155574	0.427038	0.541514		0.155586	0.053069	0.013937		0.155543	-0.138947	0.0500695		0.155635	-0.029672	0.0321335		0.155578	-0.024937	0.0697947
0.156406	0.433924	0.541769		0.156418	0.055991	0.0140146		0.156375	-0.137208	0.0501808		0.156467	-0.025845	0.0324109		0.15641	-0.023183	0.0699155
0.157238	0.440885	0.542027		0.15725	0.059546	0.014109		0.157207	-0.135442	0.0502939		0.1573	-0.021747	0.032708		0.157242	-0.020127	0.0701261
0.15807	0.447192	0.54226		0.158082	0.061454	0.0141597		0.158039	-0.132761	0.0504656		0.158132	-0.01741	0.0330223		0.158074	-0.017005	0.0703412
0.158902	0.453688	0.542501		0.158914	0.064542	0.0142417		0.15887	-0.130275	0.0506247		0.158964	-0.013326	0.0333184		0.158906	-0.014206	0.0705341
0.159734	0.460487	0.542752		0.159746	0.067582	0.0143224		0.159702	-0.127685	0.0507906		0.159796	-0.009126	0.0336228		0.159738	-0.011662	0.0707094
0.160566	0.467636	0.543017		0.160578	0.070417	0.0143977		0.160534	-0.123978	0.0510279		0.160629	-0.005111	0.0339139		0.16057	-0.008661	0.0709162
0.161397	0.476396	0.543342		0.16141	0.075896	0.0145432		0.161366	-0.120794	0.0512318		0.161461	-0.001224	0.0341956		0.161402	-0.005086	0.0711625
0.162229	0.486673	0.543722		0.162242	0.079839	0.0146479		0.162197	-0.117611	0.0514356		0.162293	0.003056	0.0345059		0.162234	-0.001596	0.071403
0.163061	0.495434	0.544047		0.163074	0.082741	0.0147249		0.163029	-0.11335	0.0517084		0.163125	0.008013	0.0348652		0.163066	0.001992	0.0716503
0.163893	0.502482	0.544308		0.163906	0.086008	0.0148117		0.163861	-0.110094	0.0519169		0.163958	0.014077	0.0353047		0.163897	0.005512	0.0718928
0.164725	0.510736	0.544613		0.164738	0.089783	0.0149119		0.164693	-0.106779	0.0521291		0.16479	0.019642	0.0357081		0.164729	0.008737	0.072115
0.165557	0.520207	0.544964		0.16557	0.094033	0.0150248		0.165525	-0.104318	0.0522867		0.165622	0.024707	0.0360753		0.165561	0.011654	0.072316
0.166389	0.529856	0.545321		0.166402	0.096495	0.0150902		0.166356	-0.101643	0.052458		0.166455	0.030267	0.0364783		0.166393	0.015184	0.0725593
0.167221	0.539511	0.545679		0.167234	0.092828	0.0149928		0.167188	-0.097861	0.0527001		0.167287	0.035514	0.0368586		0.167225	0.020476	0.0729239
0.168053	0.548984	0.54603		0.168066	0.095188	0.0150555		0.16802	-0.093695	0.0529669		0.168119	0.039801	0.0371694		0.168057	0.02595	0.0733011
0.168885	0.558573	0.546385		0.168898	0.100771	0.0152037		0.168852	-0.089332	0.0532462		0.168951	0.043717	0.0374533		0.168889	0.030315	0.0736019
0.169717	0.567558	0.546717		0.16973	0.105603	0.015332		0.169683	-0.086032	0.0534575		0.169784	0.047076	0.0376967		0.169721	0.034653	0.0739008
0.170549	0.575381	0.547007		0.170562	0.109703	0.0154409		0.170515	-0.082633	0.0536752		0.170616	0.05141	0.0380109		0.170553	0.038485	0.0741649
0.171381	0.58349	0.547307		0.171394	0.113298	0.0155364		0.171347	-0.078843	0.0539178		0.171448	0.05639	0.0383719		0.171385	0.043185	0.0744887
0.172213	0.591841	0.547617		0.172226	0.116024	0.0156088		0.172179	-0.07619	0.0540877		0.17228	0.061159	0.0387176		0.172217	0.046273	0.0747015
0.173045	0.600468	0.547936		0.173058	0.118694	0.0156797		0.173011	-0.07354	0.0542574		0.173113	0.06492	0.0389902		0.173049	0.049636	0.0749332
0.173877	0.608406	0.54823		0.17389	0.122596	0.0157833		0.173842	-0.071049	0.0544169		0.173945	0.068271	0.0392331		0.173881	0.052673	0.0751425
0.174709	0.615829	0.548505		0.174722	0.126203	0.015879		0.174674	-0.068534	0.0545779		0.174777	0.071858	0.0394931		0.174713	0.054172	0.0752458
0.175541	0.623471	0.548788		0.175554	0.128651	0.0159441		0.175506	-0.067125	0.0546681		0.17561	0.074709	0.0396998		0.175545	0.055214	0.0753176
0.176373	0.630623	0.549053		0.176386	0.131398	0.016017		0.176338	-0.065197	0.0547916		0.176442	0.077362	0.0398921		0.176377	0.057031	0.0754428
0.177204	0.637342	0.549302		0.177218	0.132954	0.0160583		0.17717	-0.063946	0.0548717		0.177274	0.079823	0.0400705		0.177209	0.058552	0.0755476
0.178036	0.643214	0.549519		0.17805	0.134517	0.0160998		0.178001	-0.061794	0.0550094		0.178106	0.081857	0.0402179		0.178041	0.060177	0.0756596
0.178868	0.648854	0.549728		0.178882	0.13652	0.016153		0.178833	-0.060821	0.0550717		0.178939	0.083464	0.0403344		0.178873	0.062176	0.0757973
0.1797	0.655601	0.549978		0.179714	0.137989	0.016192		0.179665	-0.059558	0.0551526		0.179771	0.084907	0.040439		0.179705	0.064506	0.0759579
0.180532	0.661249	0.550187		0.180546	0.139629	0.0162356		0.180497	-0.059021	0.055187		0.180603	0.086543	0.0405576		0.180537	0.068314	0.0762203
0.181364	0.665992	0.550363		0.181378	0.140708	0.0162642		0.181328	-0.058997	0.0551885		0.181435	0.089116	0.0407441		0.181369	0.070633	0.0763801
0.182196	0.669761	0.550502		0.18221	0.141652	0.0162893		0.18216	-0.058246	0.0552366		0.182268	0.090779	0.0408647		0.182201	0.070789	0.0763908
0.183028	0.672981	0.550621		0.183042	0.143975	0.016351		0.182992	-0.057265	0.0552994		0.1831	0.092103	0.0409606		0.183033	0.071268	0.0764238
0.18386	0.676972	0.550769		0.183874	0.146091	0.0164072		0.183824	-0.056756	0.055332		0.183932	0.093145	0.0410362		0.183865	0.071496	0.0764395
0.184692	0.681543	0.550938		0.184706	0.147406	0.0164421		0.184656	-0.05689	0.0553234		0.184765	0.093715	0.0410775		0.184697	0.071168	0.0764169
0.185524	0.685601	0.551089		0.185538	0.148205	0.0164633		0.185487	-0.056323	0.0553597		0.185597	0.094765	0.0411536		0.185529	0.071743	0.0764566
0.186356	0.689728	0.551242		0.18637	0.148805	0.0164792		0.186319	-0.055733	0.0553975		0.186429	0.095355	0.0411964		0.186361	0.072459	0.0765059
0.187188	0.69317	0.551369		0.187202	0.148551	0.0164725		0.187151	-0.055938	0.0553844		0.187261	0.095713	0.0412223		0.187193	0.07348	0.0765763
0.18802	0.695986	0.551473		0.188034	0.148767	0.0164782		0.187983	-0.057218	0.0553024		0.188094	0.095522	0.0412085		0.188025	0.073516	0.0765787
0.188852	0.698694	0.551574		0.188866	0.149817	0.0165061		0.188814	-0.05841	0.0552261		0.188926	0.095612	0.041215		0.188857	0.072281	0.0764936
0.189684	0.70139	0.551673		0.189698	0.149618	0.0165008		0.189646	-0.059966	0.0551265		0.189758	0.096311	0.0412656		0.189688	0.072339	0.0764976
0.190516	0.705269	0.551817		0.19053	0.148824	0.0164797		0.190478	-0.060796	0.0550733		0.19059	0.096871	0.0413062		0.19052	0.071855	0.0764643
0.191348	0.709608	0.551978		0.191362	0.149163	0.0164887		0.19131	-0.060521	0.055091		0.191423	0.09633	0.041267		0.191352	0.073822	0.0765998
0.192179	0.712974	0.552102		0.192194	0.149264	0.0164914		0.192142	-0.061095	0.0550542		0.192255	0.095454	0.0412035		0.192184	0.072213	0.0764889
0.193011	0.71556	0.552198		0.193026	0.149329	0.0164931		0.192973	-0.062148	0.0549868		0.193087	0.094765	0.0411536		0.193016	0.071186	0.0764182
0.193843	0.71791	0.552285		0.193858	0.148832	0.0164799		0.193805	-0.06274	0.0549489		0.19392	0.095112	0.0411787		0.193848	0.070586	0.0763768
0.194675	0.720468	0.55238		0.19469	0.147682	0.0164494		0.194637	-0.06382	0.0548797		0.194752	0.094848	0.0411596		0.19468	0.070779	0.0763901
0.195507	0.723381	0.552488		0.195522	0.147351	0.0164406		0.195469	-0.063726	0.0548857		0.195584	0.093547	0.0410653		0.195512	0.072043	0.0764772
0.196339	0.726158	0.552591		0.196354	0.148152	0.0164619		0.196301	-0.064302	0.0548489		0.196416	0.092406	0.0409826		0.196344	0.073817	0.0765995
0.197171	0.729164	0.552702		0.197186	0.147442	0.016443		0.197132	-0.064058	0.0548645		0.197249	0.09125	0.0408988		0.197176	0.072633	0.0765179
0.198003	0.732028	0.552808		0.198018	0.145944	0.0164033		0.197964	-0.063526	0.0548986		0.198081	0.089703	0.0407867		0.198008	0.074348	0.0766361
0.198835	0.735259	0.552928		0.19885	0.144774	0.0163722		0.198796	-0.064214	0.0548545		0.198913	0.088274	0.0406831		0.19884	0.074294	0.0766323
0.199667	0.738151	0.553035		0.199682	0.145313	0.0163865		0.199628	-0.065134	0.0547956		0.199745	0.087411	0.0406205		0.199672	0.073999	0.076612
0.200499	0.738985	0.553066		0.200514	0.144935	0.0163765		0.200459	-0.065939	0.0547441		0.200578	0.086561	0.0405589		0.200504	0.07318	0.0765556
0.201331	0.740728	0.55313		0.201346	0.144296	0.0163595		0.201291	-0.067877	0.05462		0.20141	0.084559	0.0404138		0.201336	0.071639	0.0764494
0.202163	0.74455	0.553272		0.202178	0.144429	0.016363		0.202123	-0.069769	0.0544988		0.202242	0.082335	0.0402526		0.202168	0.0704	0.076364
0.202995	0.748105	0.553403		0.20301	0.143919	0.0163495		0.202955	-0.07068	0.0544405		0.203075	0.080911	0.0401493		0.203	0.069177	0.0762797
0.203827	0.750181	0.55348		0.203842	0.14308	0.0163272		0.203787	-0.07214	0.054347		0.203907	0.0788	0.0399963		0.203832	0.06819	0.0762117
0.204659	0.752633	0.553571		0.204674	0.141775	0.0162925		0.204618	-0.073978	0.0542293		0.204739	0.077448	0.0398983		0.204664	0.067289	0.0761497
0.205491	0.756458	0.553713		0.205506	0.140743	0.0162651		0.20545	-0.075786	0.0541136		0.205571	0.075655	0.0397684		0.205496	0.066816	0.0761171
0.206323	0.759332	0.553819		0.206338	0.141372	0.0162818		0.206282	-0.076958	0.0540385		0.206404	0.073829	0.039636		0.206328	0.064739	0.0759739
0.207154	0.760266	0.553854		0.20717	0.141571	0.0162871		0.207114	-0.078211	0.0539583		0.207236	0.072031	0.0395057		0.20716	0.063119	0.0758623
0.207986	0.761989	0.553918		0.208002	0.140914	0.0162697		0.207945	-0.078923	0.0539127		0.208068	0.069736	0.0393393		0.207992	0.061393	0.0757434
0.208818	0.76476	0.55402		0.208834	0.140281	0.0162529		0.208777	-0.080016	0.0538427		0.2089	0.068155	0.0392247		0.208824	0.060841	0.0757053
0.20965	0.767388	0.554117		0.209666	0.139716	0.0162379		0.209609	-0.080159	0.0538336		0.209733	0.066638	0.0391147		0.209656	0.06059	0.075688
0.210482	0.769623	0.5542		0.210498	0.138813	0.0162139		0.210441	-0.08009	0.053838		0.210565	0.0647	0.0389743		0.210488	0.05961	0.0756205
0.211314	0.770727	0.554241		0.211331	0.138122	0.0161955		0.211273	-0.08191	0.0537215		0.211397	0.063335	0.0388753		0.21132	0.058269	0.0755281
0.212146	0.771753	0.554279		0.212163	0.137076	0.0161678		0.212104	-0.084384	0.053563		0.21223	0.062239	0.0387959		0.212152	0.056064	0.0753762
0.212978	0.773403	0.55434		0.212995	0.137064	0.0161675		0.212936	-0.085576	0.0534867		0.213062	0.060633	0.0386795		0.212984	0.055275	0.0753218
0.21381	0.775454	0.554416		0.213827	0.135518	0.0161264		0.213768	-0.087004	0.0533953		0.213894	0.059355	0.0385868		0.213816	0.054629	0.0752773
0.214642	0.778193	0.554518		0.214659	0.136461	0.0161514		0.2146	-0.088721	0.0532854		0.214726	0.058795	0.0385462		0.214647	0.0535	0.0751995
0.215474	0.780212	0.554592		0.215491	0.137456	0.0161779		0.215431	-0.089075	0.0532627		0.215559	0.057248	0.0384341		0.215479	0.052285	0.0751158
0.216306	0.783362	0.554709		0.216323	0.137161	0.01617		0.216263	-0.091956	0.0530782		0.216391	0.056479	0.0383783		0.216311	0.050506	0.0749932
0.217138	0.785501	0.554788		0.217155	0.13704	0.0161668		0.217095	-0.094021	0.052946		0.217223	0.054876	0.0382621		0.217143	0.048337	0.0748437
0.21797	0.788425	0.554896		0.217987	0.136804	0.0161605		0.217927	-0.097016	0.0527542		0.218055	0.053253	0.0381445		0.217975	0.048407	0.0748486
0.218802	0.791178	0.554998		0.218819	0.137363	0.0161754		0.218759	-0.100341	0.0525413		0.218888	0.052369	0.0380804		0.218807	0.046454	0.074714
0.219634	0.794576	0.555124		0.219651	0.137633	0.0161826		0.21959	-0.101958	0.0524378		0.21972	0.052231	0.0380704		0.219639	0.044474	0.0745776
0.220466	0.797546	0.555234		0.220483	0.137111	0.0161687		0.220422	-0.102572	0.0523985		0.220552	0.052566	0.0380947		0.220471	0.042387	0.0744337
0.221298	0.801452	0.555379		0.221315	0.136285	0.0161468		0.221254	-0.104302	0.0522877		0.221385	0.052561	0.0380943		0.221303	0.040507	0.0743042
0.22213	0.805196	0.555518		0.222147	0.13633	0.016148		0.222086	-0.103761	0.0523224		0.222217	0.052486	0.0380889		0.222135	0.039402	0.0742281
0.222961	0.807358	0.555598		0.222979	0.135505	0.0161261		0.222918	-0.103425	0.0523439		0.223049	0.051931	0.0380487		0.222967	0.038689	0.0741789
0.223793	0.808864	0.555653		0.223811	0.135784	0.0161335		0.223749	-0.10558	0.0522059		0.223881	0.050745	0.0379627		0.223799	0.039052	0.0742039
0.224625	0.811993	0.555769		0.224643	0.135726	0.0161319		0.224581	-0.106303	0.0521596		0.224714	0.049407	0.0378657		0.224631	0.039085	0.0742062
0.225457	0.815612	0.555903		0.225475	0.135694	0.0161311		0.225413	-0.107797	0.052064		0.225546	0.047427	0.0377222		0.225463	0.038591	0.0741722
0.226289	0.817061	0.555957		0.226307	0.135456	0.0161248		0.226245	-0.106354	0.0521563		0.226378	0.046978	0.0376896		0.226295	0.037742	0.0741137
0.227121	0.818627	0.556015		0.227139	0.133989	0.0160858		0.227076	-0.1083	0.0520317		0.22721	0.047365	0.0377177		0.227127	0.038327	0.074154
0.227953	0.821899	0.556136		0.227971	0.132372	0.0160429		0.227908	-0.110541	0.0518883		0.228043	0.046425	0.0376496		0.227959	0.03882	0.074188
0.228785	0.825759	0.556279		0.228803	0.132645	0.0160501		0.22874	-0.111752	0.0518107		0.228875	0.045814	0.0376053		0.228791	0.038763	0.074184
0.229617	0.828686	0.556387		0.229635	0.133299	0.0160675		0.229572	-0.113138	0.051722		0.229707	0.045297	0.0375678		0.229623	0.036591	0.0740344
0.230449	0.832041	0.556512		0.230467	0.131655	0.0160238		0.230404	-0.11526	0.0515861		0.23054	0.045425	0.0375771		0.230455	0.03401	0.0738565
0.231281	0.835997	0.556658		0.231299	0.131514	0.0160201		0.231235	-0.117258	0.0514582		0.231372	0.045297	0.0375678		0.231287	0.031902	0.0737113
0.232113	0.839485	0.556787		0.232131	0.131324	0.016015		0.232067	-0.117904	0.0514168		0.232204	0.044312	0.0374964		0.232119	0.030542	0.0736175
0.232945	0.843886	0.55695		0.232963	0.131677	0.0160244		0.232899	-0.118785	0.0513604		0.233036	0.042447	0.0373612		0.232951	0.028284	0.073462
0.233777	0.847187	0.557073		0.233795	0.131308	0.0160146		0.233731	-0.119978	0.051284		0.233869	0.04171	0.0373078		0.233783	0.027341	0.073397
0.234609	0.85021	0.557184		0.234627	0.131841	0.0160288		0.234562	-0.121238	0.0512034		0.234701	0.040833	0.0372442		0.234615	0.026009	0.0733052
0.235441	0.853041	0.557289		0.235459	0.13099	0.0160062		0.235394	-0.120564	0.0512465		0.235533	0.039237	0.0371285		0.235447	0.024403	0.0731945
0.236273	0.855957	0.557397		0.236291	0.129172	0.0159579		0.236226	-0.120769	0.0512334		0.236365	0.038051	0.0370425		0.236279	0.023654	0.0731429
0.237105	0.859415	0.557525		0.237123	0.128381	0.0159369		0.237058	-0.121773	0.0511691		0.237198	0.03749	0.0370019		0.237111	0.022819	0.0730854
0.237936	0.862472	0.557639		0.237955	0.126314	0.015882		0.23789	-0.121613	0.0511793		0.23803	0.037426	0.0369972		0.237943	0.023215	0.0731127
0.238768	0.864371	0.557709		0.238787	0.125	0.0158471		0.238721	-0.122098	0.0511483		0.238862	0.037472	0.0370006		0.238775	0.02163	0.0730035
0.2396	0.866371	0.557783		0.239619	0.123954	0.0158193		0.239553	-0.1229	0.0510969		0.239695	0.0374	0.0369954		0.239606	0.019483	0.0728555
0.240432	0.868189	0.55785		0.240451	0.123623	0.0158105		0.240385	-0.123857	0.0510357		0.240527	0.036853	0.0369557		0.240438	0.019231	0.0728381
0.241264	0.870515	0.557936		0.241283	0.122664	0.0157851		0.241217	-0.123705	0.0510454		0.241359	0.034747	0.036803		0.24127	0.019232	0.0728382
0.242096	0.873433	0.558044		0.242115	0.123237	0.0158003		0.242049	-0.124179	0.051015		0.242191	0.032741	0.0366576		0.242102	0.017967	0.072751
0.242928	0.876338	0.558152		0.242947	0.123114	0.015797		0.24288	-0.12508	0.0509574		0.243024	0.031201	0.036546		0.242934	0.016771	0.0726686
0.24376	0.878774	0.558242		0.243779	0.122987	0.0157936		0.243712	-0.12521	0.050949		0.243856	0.030002	0.0364591		0.243766	0.015278	0.0725658
0.244592	0.881918	0.558359		0.244611	0.12134	0.0157499		0.244544	-0.125253	0.0509463		0.244688	0.030101	0.0364663		0.244598	0.014275	0.0724966
0.245424	0.884857	0.558468		0.245443	0.11943	0.0156992		0.245376	-0.126014	0.0508976		0.24552	0.030965	0.0365289		0.24543	0.01294	0.0724047
0.246256	0.887736	0.558574		0.246275	0.119971	0.0157136		0.246207	-0.1274	0.0508088		0.246353	0.03165	0.0365786		0.246262	0.011503	0.0723056
0.247088	0.891306	0.558706		0.247107	0.120006	0.0157145		0.247039	-0.129712	0.0506608		0.247185	0.031442	0.0365635		0.247094	0.010117	0.0722101
0.24792	0.894574	0.558827		0.247939	0.119954	0.0157131		0.247871	-0.12919	0.0506942		0.248017	0.03111	0.0365394		0.247926	0.006638	0.0719704
0.248752	0.897998	0.558954		0.248771	0.119679	0.0157058		0.248703	-0.128877	0.0507142		0.248849	0.030783	0.0365157		0.248758	0.00522	0.0718727
0.249584	0.900061	0.559031		0.249603	0.118652	0.0156785		0.249535	-0.129741	0.0506589		0.249682	0.030872	0.0365222		0.24959	0.002855	0.0717097
0.250416	0.902534	0.559122		0.250435	0.117098	0.0156373		0.250366	-0.129209	0.050693		0.250514	0.030374	0.0364861		0.250422	0.00173	0.0716322
0.251248	0.904809	0.559206		0.251267	0.11652	0.0156219		0.251198	-0.130165	0.0506318		0.251346	0.028859	0.0363762		0.251254	0.003197	0.0717333
0.25208	0.906798	0.55928		0.252099	0.115446	0.0155934		0.25203	-0.13083	0.0505892		0.252179	0.02831	0.0363364		0.252086	0.00304	0.0717225
0.252912	0.909768	0.55939		0.252931	0.114967	0.0155807		0.252862	-0.129912	0.050648		0.253011	0.028318	0.036337		0.252918	0.001889	0.0716432
0.253743	0.911724	0.559462		0.253763	0.114641	0.015572		0.253693	-0.131289	0.0505598		0.253843	0.028772	0.0363699		0.25375	0.00246	0.0716825
0.254575	0.914252	0.559556		0.254595	0.114524	0.0155689		0.254525	-0.132232	0.0504994		0.254675	0.028106	0.0363217		0.254582	0.002113	0.0716586
0.255407	0.917467	0.559675		0.255427	0.114071	0.0155569		0.255357	-0.132756	0.0504659		0.255508	0.027251	0.0362597		0.255414	0.001983	0.0716496
0.256239	0.919967	0.559768		0.256259	0.114093	0.0155575		0.256189	-0.134982	0.0503233		0.25634	0.027198	0.0362558		0.256246	0.001689	0.0716294
0.257071	0.921727	0.559833		0.257091	0.114356	0.0155645		0.257021	-0.135412	0.0502958		0.257172	0.026266	0.0361883		0.257078	-0.00154	0.0714069
0.257903	0.922647	0.559867		0.257923	0.113388	0.0155388		0.257852	-0.135582	0.0502849		0.258004	0.0252	0.036111		0.25791	-0.002464	0.0713432
0.258735	0.92555	0.559974		0.258755	0.113853	0.0155511		0.258684	-0.137881	0.0501377		0.258837	0.024404	0.0360533		0.258742	-0.003799	0.0712512
0.259567	0.928873	0.560098		0.259587	0.114429	0.0155664		0.259516	-0.139084	0.0500607		0.259669	0.023778	0.0360079		0.259574	-0.004966	0.0711708
0.260399	0.931426	0.560192		0.260419	0.115114	0.0155846		0.260348	-0.139501	0.050034		0.260501	0.022813	0.035938		0.260406	-0.005414	0.0711399
0.261231	0.934898	0.560321		0.261251	0.114934	0.0155798		0.26118	-0.140009	0.0500015		0.261334	0.022577	0.0359209		0.261238	-0.006768	0.0710466
0.262063	0.937744	0.560426		0.262083	0.115105	0.0155843		0.262011	-0.141339	0.0499163		0.262166	0.023208	0.0359666		0.26207	-0.007817	0.0709744
0.262895	0.939884	0.560505		0.262915	0.113892	0.0155521		0.262843	-0.142527	0.0498403		0.262998	0.023695	0.0360019		0.262902	-0.009315	0.0708711
0.263727	0.942905	0.560617		0.263747	0.1134	0.0155391		0.263675	-0.14449	0.0497146		0.26383	0.024529	0.0360624		0.263734	-0.010064	0.0708195
0.264559	0.946751	0.56076		0.264579	0.112187	0.0155069		0.264507	-0.14582	0.0496294		0.264663	0.02378	0.0360081		0.264565	-0.01189	0.0706937
0.265391	0.949919	0.560877		0.265411	0.110314	0.0154571		0.265338	-0.145638	0.0496411		0.265495	0.021932	0.0358741		0.265397	-0.013872	0.0705571
0.266223	0.95311	0.560995		0.266243	0.109753	0.0154422		0.26617	-0.146701	0.049573		0.266327	0.020271	0.0357537		0.266229	-0.015336	0.0704563
0.267055	0.955821	0.561095		0.267075	0.107436	0.0153807		0.267002	-0.146764	0.049569		0.267159	0.018209	0.0356043		0.267061	-0.016512	0.0703752
0.267887	0.95883	0.561207		0.267907	0.105865	0.015339		0.267834	-0.146537	0.0495835		0.267992	0.016747	0.0354983		0.267893	-0.017307	0.0703204
0.268718	0.962347	0.561337		0.268739	0.105974	0.0153419		0.268666	-0.14809	0.0494841		0.268824	0.015023	0.0353733		0.268725	-0.016126	0.0704018
0.26955	0.964691	0.561424		0.269571	0.104891	0.0153131		0.269497	-0.14863	0.0494495		0.269656	0.014288	0.03532		0.269557	-0.017339	0.0703182
0.270382	0.968187	0.561553		0.270403	0.103149	0.0152669		0.270329	-0.149435	0.0493979		0.270489	0.012869	0.0352172		0.270389	-0.017335	0.0703185
0.271214	0.970448	0.561637		0.271235	0.102192	0.0152415		0.271161	-0.152135	0.0492251		0.271321	0.011751	0.0351361		0.271221	-0.018843	0.0702146
0.272046	0.971901	0.561691		0.272067	0.101752	0.0152298		0.271993	-0.152879	0.0491774		0.272153	0.011029	0.0350838		0.272053	-0.021642	0.0700217
0.272878	0.97484	0.5618		0.272899	0.100602	0.0151992		0.272824	-0.153216	0.0491559		0.272985	0.009913	0.0350029		0.272885	-0.023899	0.0698662
0.27371	0.976935	0.561877		0.273731	0.100298	0.0151912		0.273656	-0.154835	0.0490522		0.273818	0.008894	0.034929		0.273717	-0.024222	0.0698439
0.274542	0.979125	0.561958		0.274563	0.098481	0.0151429		0.274488	-0.155863	0.0489864		0.27465	0.008111	0.0348723		0.274549	-0.026727	0.0696713
0.275374	0.982707	0.562091		0.275395	0.097546	0.0151181		0.27532	-0.156717	0.0489317		0.275482	0.008365	0.0348907		0.275381	-0.028057	0.0695797
0.276206	0.984225	0.562147		0.276227	0.096276	0.0150844		0.276152	-0.156368	0.048954		0.276314	0.008645	0.034911		0.276213	-0.030108	0.0694384
0.277038	0.986723	0.56224		0.277059	0.095659	0.015068		0.276983	-0.156416	0.048951		0.277147	0.008372	0.0348912		0.277045	-0.030498	0.0694115
0.27787	0.990438	0.562377		0.277891	0.093562	0.0150123		0.277815	-0.16024	0.0487061		0.277979	0.009473	0.034971		0.277877	-0.029263	0.0694966
0.278702	0.993701	0.562498		0.278723	0.092885	0.0149943		0.278647	-0.161842	0.0486035		0.278811	0.009809	0.0349954		0.278709	-0.030724	0.0693959
0.279534	0.997742	0.562648		0.279555	0.090112	0.0149207		0.279479	-0.161489	0.0486261		0.279644	0.009592	0.0349796		0.279541	-0.031937	0.0693123
0.280366	1.00076	0.562759		0.280387	0.088389	0.0148749		0.28031	-0.16066	0.0486792		0.280476	0.008501	0.0349005		0.280373	-0.03268	0.0692611
0.281198	1.0051	0.56292		0.281219	0.085928	0.0148096		0.281142	-0.160439	0.0486934		0.281308	0.007726	0.0348444		0.281205	-0.033421	0.0692101
0.28203	1.00737	0.563004		0.282051	0.084011	0.0147587		0.281974	-0.160985	0.0486584		0.28214	0.006488	0.0347546		0.282037	-0.033753	0.0691872
0.282862	1.01039	0.563116		0.282883	0.082894	0.014729		0.282806	-0.162126	0.0485854		0.282973	0.005521	0.0346845		0.282869	-0.035313	0.0690797
0.283694	1.01329	0.563224		0.283715	0.082998	0.0147318		0.283638	-0.163318	0.048509		0.283805	0.004617	0.034619		0.283701	-0.034471	0.0691377
0.284525	1.01536	0.5633		0.284547	0.081486	0.0146916		0.284469	-0.162454	0.0485644		0.284637	0.002701	0.0344801		0.284533	-0.035392	0.0690743
0.285357	1.01694	0.563359		0.285379	0.081586	0.0146943		0.285301	-0.162915	0.0485348		0.28547	0.002755	0.034484		0.285365	-0.03492	0.0691068
0.286189	1.02061	0.563495		0.286211	0.08182	0.0147005		0.286133	-0.164695	0.0484209		0.286302	0.003065	0.0345065		0.286197	-0.035644	0.0690569
0.287021	1.02381	0.563613		0.287043	0.08156	0.0146936		0.286965	-0.166475	0.0483069		0.287134	0.002649	0.0344764		0.287029	-0.036326	0.0690099
0.287853	1.02709	0.563735		0.287875	0.081167	0.0146832		0.287797	-0.166337	0.0483157		0.287966	0.00296	0.0344989		0.287861	-0.036852	0.0689737
0.288685	1.02896	0.563804		0.288707	0.080522	0.014666		0.288628	-0.167967	0.0482114		0.288799	0.002578	0.0344712		0.288693	-0.036399	0.0690049
0.289517	1.03103	0.563881		0.289539	0.077692	0.0145909		0.28946	-0.169332	0.048124		0.289631	0.000476	0.0343188		0.289525	-0.036443	0.0690018
0.290349	1.03372	0.56398		0.290371	0.077711	0.0145914		0.290292	-0.169423	0.0481181		0.290463	-0.000286	0.0342636		0.290356	-0.038153	0.068884
0.291181	1.03702	0.564102		0.291203	0.07827	0.0146062		0.291124	-0.171567	0.0479809		0.291295	0.000377	0.0343117		0.291188	-0.039502	0.0687911
0.292013	1.042	0.564287		0.292035	0.077278	0.0145799		0.291955	-0.170657	0.0480391		0.292128	0.000359	0.0343104		0.29202	-0.040102	0.0687497
0.292845	1.04613	0.56444		0.292867	0.076285	0.0145535		0.292787	-0.170415	0.0480546		0.29296	0.0004	0.0343133		0.292852	-0.040971	0.0686898
0.293677	1.04849	0.564527		0.2937	0.075382	0.0145295		0.293619	-0.171398	0.0479917		0.293792	-0.000698	0.0342337		0.293684	-0.04114	0.0686782
0.294509	1.05035	0.564596		0.294531	0.07437	0.0145027		0.294451	-0.172041	0.0479505		0.294624	-0.001189	0.0341981		0.294516	-0.042045	0.0686158
0.295341	1.05294	0.564692		0.295364	0.073456	0.0144784		0.295283	-0.171913	0.0479587		0.295457	-0.001548	0.0341721		0.295348	-0.042513	0.0685836
0.296173	1.05662	0.564828		0.296196	0.072499	0.014453		0.296114	-0.171577	0.0479802		0.296289	-0.00248	0.0341046		0.29618	-0.043533	0.0685133
0.297005	1.0611	0.564994		0.297028	0.071143	0.014417		0.296946	-0.173351	0.0478666		0.297121	-0.002819	0.03408		0.297012	-0.043574	0.0685105
0.297837	1.0648	0.565131		0.29786	0.06918	0.0143648		0.297778	-0.174985	0.047762		0.297954	-0.003809	0.0340082		0.297844	-0.045164	0.0684009
0.298669	1.06854	0.56527		0.298692	0.067822	0.0143288		0.29861	-0.174038	0.0478227		0.298786	-0.005323	0.0338985		0.298676	-0.046472	0.0683108
0.2995	1.07171	0.565387		0.299524	0.067109	0.0143099		0.299441	-0.174157	0.047815		0.299618	-0.006227	0.033833		0.299508	-0.04739	0.0682475
0.300332	1.07377	0.565463		0.300356	0.067017	0.0143074		0.300273	-0.174723	0.0477788		0.30045	-0.006262	0.0338304		0.30034	-0.04831	0.0681841
0.301164	1.07632	0.565558		0.301188	0.065989	0.0142801		0.301105	-0.176719	0.047651		0.301283	-0.006468	0.0338155		0.301172	-0.049064	0.0681322
0.301996	1.0783	0.565631		0.30202	0.065445	0.0142657		0.301937	-0.176741	0.0476496		0.302115	-0.007173	0.0337644		0.302004	-0.050761	0.0680152
0.302828	1.08261	0.56579		0.302852	0.065386	0.0142641		0.302769	-0.177085	0.0476276		0.302947	-0.007398	0.0337481		0.302836	-0.051448	0.0679679
0.30366	1.08546	0.565896		0.303684	0.063908	0.0142249		0.3036	-0.178593	0.047531		0.303779	-0.008647	0.0336575		0.303668	-0.052506	0.067895
0.304492	1.08859	0.566012		0.304516	0.061568	0.0141627		0.304432	-0.179027	0.0475032		0.304612	-0.009355	0.0336062		0.3045	-0.054225	0.0677765
0.305324	1.09217	0.566145		0.305348	0.060086	0.0141234		0.305264	-0.180021	0.0474396		0.305444	-0.009856	0.0335699		0.305332	-0.05586	0.0676639
0.306156	1.09596	0.566285		0.30618	0.057595	0.0140572		0.306096	-0.181449	0.0473481		0.306276	-0.011132	0.0334774		0.306164	-0.058432	0.0674867
0.306988	1.09808	0.566364		0.307012	0.056013	0.0140152		0.306928	-0.181974	0.0473145		0.307109	-0.011918	0.0334204		0.306996	-0.05865	0.0674716
0.30782	1.0994	0.566412		0.307844	0.05515	0.0139923		0.307759	-0.182658	0.0472707		0.307941	-0.01222	0.0333985		0.307828	-0.059588	0.067407
0.308652	1.10225	0.566518		0.308676	0.054243	0.0139682		0.308591	-0.184418	0.047158		0.308773	-0.013143	0.0333316		0.30866	-0.060906	0.0673162
0.309484	1.10531	0.566631		0.309508	0.052722	0.0139278		0.309423	-0.184897	0.0471274		0.309605	-0.014281	0.0332491		0.309492	-0.063351	0.0671477
0.310316	1.10922	0.566776		0.31034	0.052643	0.0139257		0.310255	-0.184277	0.0471671		0.310438	-0.013576	0.0333003		0.310324	-0.066001	0.0669651
0.311148	1.11252	0.566898		0.311172	0.050848	0.0138781		0.311086	-0.183643	0.0472077		0.31127	-0.013747	0.0332879		0.311156	-0.067491	0.0668624
0.31198	1.11519	0.566997		0.312004	0.049866	0.013852		0.311918	-0.182561	0.0472769		0.312102	-0.014385	0.0332416		0.311988	-0.068293	0.0668072
0.312812	1.11606	0.567029		0.312836	0.049528	0.013843		0.31275	-0.183198	0.0472362		0.312934	-0.014546	0.0332299		0.31282	-0.068408	0.0667992
0.313644	1.11816	0.567107		0.313668	0.049316	0.0138374		0.313582	-0.184843	0.0471308		0.313767	-0.015133	0.0331874		0.313652	-0.068871	0.0667673
0.314476	1.12228	0.56726		0.3145	0.049305	0.0138371		0.314414	-0.18579	0.0470702		0.314599	-0.01583	0.0331369		0.314484	-0.069619	0.0667158
0.315307	1.12668	0.567423		0.315332	0.049234	0.0138352		0.315245	-0.186378	0.0470325		0.315431	-0.01677	0.0330687		0.315315	-0.070726	0.0666395
0.316139	1.13034	0.567558		0.316164	0.048222	0.0138083		0.316077	-0.186491	0.0470253		0.316264	-0.016794	0.033067		0.316147	-0.071192	0.0666074
0.316971	1.13251	0.567638		0.316996	0.045941	0.0137478		0.316909	-0.186381	0.0470324		0.317096	-0.016634	0.0330786		0.316979	-0.072431	0.066522
0.317803	1.13412	0.567698		0.317828	0.046432	0.0137608		0.317741	-0.186321	0.0470362		0.317928	-0.01694	0.0330564		0.317811	-0.073577	0.0664431
0.318635	1.13664	0.567792		0.31866	0.047695	0.0137943		0.318572	-0.185046	0.0471178		0.31876	-0.017531	0.0330136		0.318643	-0.074217	0.066399
0.319467	1.13775	0.567832		0.319492	0.047081	0.013778		0.319404	-0.184463	0.0471552		0.319593	-0.018191	0.0329657		0.319475	-0.075349	0.066321
0.320299	1.14027	0.567926		0.320324	0.047185	0.0137808		0.320236	-0.185763	0.0470719		0.320425	-0.018044	0.0329764		0.320307	-0.076133	0.0662669
0.321131	1.14425	0.568073		0.321156	0.047074	0.0137778		0.321068	-0.187088	0.0469871		0.321257	-0.019404	0.0328778		0.321139	-0.076323	0.0662538
0.321963	1.14748	0.568193		0.321988	0.046563	0.0137643		0.3219	-0.186974	0.0469944		0.322089	-0.019451	0.0328744		0.321971	-0.076205	0.066262
0.322795	1.15091	0.56832		0.32282	0.046658	0.0137668		0.322731	-0.187629	0.0469524		0.322922	-0.019013	0.0329061		0.322803	-0.076682	0.0662291
0.323627	1.15252	0.568379		0.323652	0.046382	0.0137595		0.323563	-0.188928	0.0468693		0.323754	-0.018473	0.0329453		0.323635	-0.076528	0.0662397
0.324459	1.15638	0.568522		0.324484	0.044852	0.0137188		0.324395	-0.188945	0.0468682		0.324586	-0.01717	0.0330397		0.324467	-0.076657	0.0662308
0.325291	1.15894	0.568617		0.325316	0.0453	0.0137307		0.325227	-0.188053	0.0469253		0.325419	-0.016762	0.0330693		0.325299	-0.076695	0.0662282
0.326123	1.16294	0.568765		0.326148	0.044802	0.0137175		0.326058	-0.18905	0.0468615		0.326251	-0.016135	0.0331148		0.326131	-0.076534	0.0662393
0.326955	1.16748	0.568933		0.32698	0.045061	0.0137244		0.32689	-0.19074	0.0467533		0.327083	-0.016468	0.0330906		0.326963	-0.076797	0.0662212
0.327787	1.17155	0.569084		0.327812	0.04518	0.0137275		0.327722	-0.191107	0.0467298		0.327915	-0.017586	0.0330096		0.327795	-0.077206	0.066193
0.328619	1.17609	0.569252		0.328644	0.044285	0.0137038		0.328554	-0.191648	0.0466951		0.328748	-0.019653	0.0328597		0.328627	-0.076384	0.0662496
0.329451	1.17858	0.569345		0.329476	0.043998	0.0136962		0.329386	-0.192191	0.0466604		0.32958	-0.019328	0.0328833		0.329459	-0.077341	0.0661837
0.330282	1.18146	0.569451		0.330308	0.045364	0.0137324		0.330217	-0.192847	0.0466183		0.330412	-0.018879	0.0329159		0.330291	-0.078745	0.066087
0.331114	1.18444	0.569562		0.33114	0.044744	0.013716		0.331049	-0.193592	0.0465706		0.331244	-0.019338	0.0328826		0.331123	-0.077293	0.066187
0.331946	1.18747	0.569674		0.331972	0.043752	0.0136896		0.331881	-0.196147	0.0464071		0.332077	-0.021079	0.0327564		0.331955	-0.077014	0.0662062
0.332778	1.19141	0.56982		0.332804	0.042533	0.0136573		0.332713	-0.19756	0.0463166		0.332909	-0.022864	0.032627		0.332787	-0.080031	0.0659983
0.33361	1.19596	0.569988		0.333636	0.042643	0.0136602		0.333545	-0.198566	0.0462522		0.333741	-0.025477	0.0324376		0.333619	-0.080757	0.0659483
0.334442	1.20109	0.570178		0.334468	0.041824	0.0136384		0.334376	-0.199122	0.0462166		0.334574	-0.027351	0.0323017		0.334451	-0.082364	0.0658376
0.335274	1.20556	0.570344		0.3353	0.040057	0.0135915		0.335208	-0.199267	0.0462073		0.335406	-0.027683	0.0322777		0.335283	-0.082751	0.0658109
0.336106	1.21033	0.57052		0.336132	0.038931	0.0135616		0.33604	-0.201194	0.0460839		0.336238	-0.026855	0.0323377		0.336115	-0.084004	0.0657246
0.336938	1.21382	0.57065		0.336964	0.039486	0.0135763		0.336872	-0.203689	0.0459242		0.33707	-0.028284	0.0322341		0.336947	-0.083586	0.0657534
0.33777	1.21702	0.570768		0.337796	0.040432	0.0136015		0.337703	-0.206694	0.0457318		0.337903	-0.029215	0.0321666		0.337779	-0.082491	0.0658288
0.338602	1.22256	0.570973		0.338628	0.039421	0.0135746		0.338535	-0.208542	0.0456134		0.338735	-0.030492	0.0320741		0.338611	-0.08173	0.0658813
0.339434	1.22555	0.571084		0.33946	0.038254	0.0135436		0.339367	-0.210633	0.0454795		0.339567	-0.031932	0.0319697		0.339443	-0.081852	0.0658729
0.340266	1.23094	0.571283		0.340292	0.039696	0.0135819		0.340199	-0.212535	0.0453578		0.340399	-0.032137	0.0319548		0.340274	-0.082326	0.0658402
0.341098	1.2359	0.571467		0.341124	0.039714	0.0135824		0.341031	-0.212205	0.0453789		0.341232	-0.032004	0.0319645		0.341106	-0.082731	0.0658123
0.34193	1.23843	0.571561		0.341956	0.039558	0.0135783		0.341862	-0.2132	0.0453152		0.342064	-0.031902	0.0319719		0.341938	-0.084341	0.0657014
0.342762	1.24092	0.571653		0.342788	0.039606	0.0135795		0.342694	-0.214456	0.0452348		0.342896	-0.032951	0.0318958		0.34277	-0.086715	0.0655378
0.343594	1.24457	0.571788		0.34362	0.037975	0.0135362		0.343526	-0.215763	0.0451511		0.343729	-0.034796	0.0317621		0.343602	-0.086941	0.0655222
0.344426	1.24874	0.571943		0.344452	0.038051	0.0135382		0.344358	-0.215769	0.0451507		0.344561	-0.036582	0.0316326		0.344434	-0.088559	0.0654107
0.345258	1.25186	0.572058		0.345284	0.038587	0.0135525		0.345189	-0.21628	0.045118		0.345393	-0.039376	0.0314301		0.345266	-0.089831	0.0653231
0.346089	1.25563	0.572198		0.346116	0.038934	0.0135617		0.346021	-0.218114	0.0450005		0.346225	-0.041625	0.0312671		0.346098	-0.089831	0.0653231
0.346921	1.25886	0.572318		0.346948	0.038802	0.0135582		0.346853	-0.219066	0.0449396		0.347058	-0.043364	0.031141		0.34693	-0.091396	0.0652152
0.347753	1.25991	0.572356		0.34778	0.037837	0.0135326		0.347685	-0.218816	0.0449556		0.34789	-0.044256	0.0310763		0.347762	-0.091342	0.0652189
0.348585	1.26282	0.572464		0.348612	0.036736	0.0135033		0.348517	-0.219648	0.0449023		0.348722	-0.043729	0.0311145		0.348594	-0.09184	0.0651846
0.349417	1.26597	0.572581		0.349444	0.037372	0.0135202		0.349348	-0.218874	0.0449519		0.349554	-0.041688	0.0312625		0.349426	-0.093497	0.0650704
0.350249	1.27021	0.572738		0.350276	0.036247	0.0134903		0.35018	-0.219329	0.0449228		0.350387	-0.042787	0.0311828		0.350258	-0.094103	0.0650287
0.351081	1.27534	0.572928		0.351108	0.03628	0.0134912		0.351012	-0.219635	0.0449032		0.351219	-0.043616	0.0311227		0.35109	-0.09262	0.0651309
0.351913	1.27846	0.573043		0.35194	0.035502	0.0134706		0.351844	-0.220532	0.0448457		0.352051	-0.044703	0.0310439		0.351922	-0.093189	0.0650917
0.352745	1.28243	0.57319		0.352772	0.035322	0.0134658		0.352675	-0.221537	0.0447814		0.352884	-0.044083	0.0310889		0.352754	-0.094015	0.0650348
0.353577	1.28495	0.573283		0.353604	0.035693	0.0134756		0.353507	-0.22134	0.044794		0.353716	-0.043424	0.0311367		0.353586	-0.093113	0.0650969
0.354409	1.28895	0.573432		0.354436	0.035512	0.0134708		0.354339	-0.221714	0.04477		0.354548	-0.041358	0.0312864		0.354418	-0.093759	0.0650524
0.355241	1.29112	0.573512		0.355268	0.035548	0.0134718		0.355171	-0.222669	0.0447089		0.35538	-0.040492	0.0313492		0.35525	-0.094086	0.0650299
0.356073	1.29324	0.573591		0.3561	0.035439	0.0134689		0.356003	-0.224458	0.0445944		0.356213	-0.040762	0.0313296		0.356082	-0.095167	0.0649554
0.356905	1.29634	0.573705		0.356932	0.03362	0.0134206		0.356834	-0.224531	0.0445897		0.357045	-0.041714	0.0312606		0.356914	-0.095053	0.0649632
0.357737	1.30035	0.573854		0.357764	0.032631	0.0133943		0.357666	-0.223584	0.0446503		0.357877	-0.041237	0.0312952		0.357746	-0.095854	0.064908
0.358569	1.30428	0.573999		0.358596	0.031721	0.0133702		0.358498	-0.22286	0.0446967		0.358709	-0.041699	0.0312617		0.358578	-0.096892	0.0648365
0.359401	1.30624	0.574072		0.359428	0.031042	0.0133521		0.35933	-0.2224	0.0447261		0.359542	-0.041481	0.0312775		0.35941	-0.097483	0.0647958
0.360233	1.30963	0.574197		0.36026	0.03041	0.0133353		0.360162	-0.220001	0.0448797		0.360374	-0.040934	0.0313171		0.360242	-0.097615	0.0647867
0.361064	1.31169	0.574274		0.361092	0.028558	0.0132862		0.360993	-0.220035	0.0448775		0.361206	-0.041794	0.0312548		0.361074	-0.098955	0.0646944
0.361896	1.31457	0.57438		0.361924	0.028115	0.0132744		0.361825	-0.220456	0.0448506		0.362039	-0.043301	0.0311456		0.361906	-0.100046	0.0646192
0.362728	1.31921	0.574552		0.362756	0.026819	0.01324		0.362657	-0.220239	0.0448645		0.362871	-0.042344	0.0312149		0.362738	-0.100193	0.064609
0.36356	1.32329	0.574703		0.363588	0.025336	0.0132006		0.363489	-0.219872	0.044888		0.363703	-0.040806	0.0313264		0.36357	-0.099484	0.0646579
0.364392	1.32623	0.574812		0.36442	0.024581	0.0131806		0.36432	-0.219435	0.044916		0.364535	-0.040259	0.0313661		0.364402	-0.100189	0.0646093
0.365224	1.32826	0.574887		0.365252	0.023229	0.0131447		0.365152	-0.219733	0.0448969		0.365368	-0.041477	0.0312778		0.365234	-0.100849	0.0645638
0.366056	1.33075	0.57498		0.366084	0.022108	0.0131149		0.365984	-0.220658	0.0448377		0.3662	-0.04116	0.0313008		0.366065	-0.101576	0.0645138
0.366888	1.33317	0.575069		0.366916	0.020693	0.0130773		0.366816	-0.221382	0.0447913		0.367032	-0.040559	0.0313443		0.366897	-0.103315	0.0643939
0.36772	1.33466	0.575125		0.367748	0.020209	0.0130645		0.367648	-0.220566	0.0448435		0.367864	-0.040185	0.0313714		0.367729	-0.103099	0.0644088
0.368552	1.33877	0.575277		0.36858	0.019827	0.0130543		0.368479	-0.220089	0.0448741		0.368697	-0.040603	0.0313411		0.368561	-0.104472	0.0643142
0.369384	1.34177	0.575388		0.369412	0.020379	0.013069		0.369311	-0.220443	0.0448514		0.369529	-0.04143	0.0312812		0.369393	-0.105335	0.0642547
0.370216	1.34478	0.575499		0.370244	0.019424	0.0130436		0.370143	-0.222112	0.0447446		0.370361	-0.043381	0.0311398		0.370225	-0.107372	0.0641144
0.371048	1.34645	0.575561		0.371076	0.01967	0.0130502		0.370975	-0.223071	0.0446832		0.371194	-0.043518	0.0311298		0.371057	-0.107919	0.0640767
0.37188	1.34807	0.575621		0.371908	0.018945	0.0130309		0.371806	-0.223476	0.0446572		0.372026	-0.043281	0.031147		0.371889	-0.109474	0.0639695
0.372712	1.3511	0.575733		0.37274	0.019928	0.013057		0.372638	-0.223576	0.0446508		0.372858	-0.042287	0.0312191		0.372721	-0.111235	0.0638482
0.373544	1.35287	0.575799		0.373572	0.019613	0.0130486		0.37347	-0.223111	0.0446806		0.37369	-0.0433	0.0311456		0.373553	-0.110915	0.0638702
0.374376	1.35561	0.5759		0.374404	0.019156	0.0130365		0.374302	-0.223979	0.044625		0.374523	-0.044316	0.031072		0.374385	-0.110845	0.0638751
0.375208	1.35786	0.575984		0.375236	0.01854	0.0130201		0.375134	-0.224889	0.0445668		0.375355	-0.046135	0.0309401		0.375217	-0.110427	0.0639039
0.37604	1.3609	0.576096		0.376068	0.01713	0.0129827		0.375965	-0.225168	0.0445489		0.376187	-0.045856	0.0309604		0.376049	-0.110578	0.0638935
0.376871	1.36525	0.576257		0.3769	0.016469	0.0129652		0.376797	-0.224374	0.0445997		0.377019	-0.045868	0.0309595		0.376881	-0.109413	0.0639737
0.377703	1.3673	0.576333		0.377732	0.017181	0.0129841		0.377629	-0.223286	0.0446694		0.377852	-0.046453	0.0309171		0.377713	-0.109445	0.0639715
0.378535	1.36981	0.576426		0.378565	0.017336	0.0129882		0.378461	-0.223296	0.0446688		0.378684	-0.047169	0.0308652		0.378545	-0.111614	0.0638221
0.379367	1.37191	0.576504		0.379396	0.017027	0.01298		0.379293	-0.223558	0.044652		0.379516	-0.048996	0.0307328		0.379377	-0.113372	0.0637009
0.380199	1.37608	0.576658		0.380229	0.017573	0.0129945		0.380124	-0.223339	0.044666		0.380349	-0.050505	0.0306234		0.380209	-0.115464	0.0635568
0.381031	1.38058	0.576825		0.381061	0.016896	0.0129765		0.380956	-0.225172	0.0445486		0.381181	-0.050459	0.0306267		0.381041	-0.116155	0.0635092
0.381863	1.38275	0.576905		0.381893	0.017026	0.0129799		0.381788	-0.226136	0.0444869		0.382013	-0.050896	0.030595		0.381873	-0.115824	0.063532
0.382695	1.38452	0.576971		0.382725	0.0162	0.012958		0.38262	-0.225914	0.0445011		0.382845	-0.049705	0.0306814		0.382705	-0.116219	0.0635048
0.383527	1.38752	0.577082		0.383557	0.0161	0.0129554		0.383451	-0.225972	0.0444974		0.383678	-0.050807	0.0306015		0.383537	-0.117068	0.0634463
0.384359	1.38983	0.577167		0.384389	0.016672	0.0129705		0.384283	-0.225655	0.0445177		0.38451	-0.05193	0.0305201		0.384369	-0.117826	0.063394
0.385191	1.39353	0.577305		0.385221	0.016795	0.0129738		0.385115	-0.226398	0.0444701		0.385342	-0.051754	0.0305328		0.385201	-0.117691	0.0634033
0.386023	1.39725	0.577442		0.386053	0.017176	0.0129839		0.385947	-0.226581	0.0444584		0.386174	-0.050585	0.0306176		0.386033	-0.118547	0.0633443
0.386855	1.40138	0.577595		0.386885	0.017759	0.0129994		0.386779	-0.22601	0.044495		0.387007	-0.050013	0.030659		0.386865	-0.117834	0.0633935
0.387687	1.40584	0.57776		0.387717	0.019021	0.0130329		0.38761	-0.226271	0.0444783		0.387839	-0.050088	0.0306536		0.387697	-0.117496	0.0634168
0.388519	1.41037	0.577928		0.388549	0.018979	0.0130318		0.388442	-0.226996	0.0444318		0.388671	-0.050981	0.0305889		0.388529	-0.118041	0.0633792
0.389351	1.41437	0.578076		0.389381	0.018291	0.0130135		0.389274	-0.227301	0.0444123		0.389504	-0.048845	0.0307437		0.389361	-0.11893	0.0633179
0.390183	1.4168	0.578166		0.390213	0.017599	0.0129952		0.390106	-0.226657	0.0444536		0.390336	-0.048991	0.0307331		0.390193	-0.118967	0.0633154
0.391015	1.41845	0.578227		0.391045	0.017072	0.0129812		0.390937	-0.225874	0.0445037		0.391168	-0.047601	0.0308339		0.391024	-0.117814	0.0633948
0.391846	1.42342	0.578411		0.391877	0.016008	0.0129529		0.391769	-0.225721	0.0445135		0.392	-0.047138	0.0308674		0.391856	-0.117725	0.063401
0.392678	1.42697	0.578543		0.392709	0.01487	0.0129227		0.392601	-0.225623	0.0445198		0.392833	-0.046159	0.0309384		0.392688	-0.118175	0.06337
0.39351	1.43016	0.578661		0.393541	0.012173	0.0128511		0.393433	-0.226186	0.0444837		0.393665	-0.046849	0.0308884		0.39352	-0.118423	0.0633529
0.394342	1.43531	0.578852		0.394373	0.011449	0.0128319		0.394265	-0.225286	0.0445413		0.394497	-0.046976	0.0308792		0.394352	-0.119079	0.0633077
0.395174	1.43928	0.578999		0.395205	0.009667	0.0127845		0.395096	-0.224212	0.0446101		0.395329	-0.046712	0.0308983		0.395184	-0.120029	0.0632422
0.396006	1.44179	0.579092		0.396037	0.007437	0.0127253		0.395928	-0.224231	0.0446089		0.396162	-0.046618	0.0309051		0.396016	-0.121665	0.0631295
0.396838	1.44569	0.579236		0.396869	0.00746	0.0127259		0.39676	-0.224866	0.0445682		0.396994	-0.045658	0.0309747		0.396848	-0.122273	0.0630876
0.39767	1.44617	0.579254		0.397701	0.006797	0.0127083		0.397592	-0.225434	0.0445319		0.397826	-0.045185	0.031009		0.39768	-0.12305	0.0630341
0.398502	1.44919	0.579366		0.398533	0.006184	0.012692		0.398423	-0.226471	0.0444655		0.398659	-0.043983	0.0310961		0.398512	-0.125203	0.0628857
0.399334	1.45281	0.5795		0.399365	0.006441	0.0126989		0.399255	-0.227381	0.0444072		0.399491	-0.042238	0.0312226		0.399344	-0.125651	0.0628548
0.400166	1.4574	0.57967		0.400197	0.007425	0.012725		0.400087	-0.228076	0.0443627		0.400323	-0.040187	0.0313713		0.400176	-0.125998	0.0628309
0.400998	1.46019	0.579773		0.401029	0.007199	0.012719		0.400919	-0.229431	0.0442759		0.401155	-0.037771	0.0315464		0.401008	-0.126178	0.0628185
0.40183	1.4624	0.579855		0.401861	0.005949	0.0126858		0.401751	-0.230193	0.0442271		0.401988	-0.037341	0.0315776		0.40184	-0.126549	0.0627929
0.402662	1.46629	0.579999		0.402693	0.005044	0.0126618		0.402582	-0.230229	0.0442248		0.40282	-0.035972	0.0316768		0.402672	-0.126948	0.0627655
0.403494	1.47107	0.580176		0.403525	0.004321	0.0126426		0.403414	-0.231343	0.0441535		0.403652	-0.03533	0.0317234		0.403504	-0.12776	0.0627095
0.404326	1.47233	0.580222		0.404357	0.004356	0.0126435		0.404246	-0.231142	0.0441664		0.404484	-0.034759	0.0317648		0.404336	-0.128033	0.0626907
0.405158	1.47625	0.580368		0.405189	0.004124	0.0126373		0.405078	-0.232668	0.0440687		0.405317	-0.033797	0.0318345		0.405168	-0.128355	0.0626685
0.40599	1.47942	0.580485		0.406021	0.003872	0.0126306		0.40591	-0.231518	0.0441423		0.406149	-0.033267	0.0318729		0.406	-0.129402	0.0625964
0.406821	1.48094	0.580542		0.406853	0.003259	0.0126144		0.406741	-0.231167	0.0441648		0.406981	-0.033555	0.031852		0.406832	-0.129699	0.0625759
0.407653	1.48293	0.580615		0.407685	0.002847	0.0126034		0.407573	-0.231925	0.0441163		0.407814	-0.033393	0.0318638		0.407664	-0.131403	0.0624585
0.408485	1.48575	0.58072		0.408517	0.000774	0.0125484		0.408405	-0.232768	0.0440623		0.408646	-0.03278	0.0319082		0.408496	-0.133571	0.0623091
0.409317	1.48984	0.580871		0.409349	-0.000368	0.0125181		0.409237	-0.23346	0.044018		0.409478	-0.03195	0.0319684		0.409328	-0.133929	0.0622844
0.410149	1.49154	0.580934		0.410181	0.000125	0.0125312		0.410068	-0.233936	0.0439875		0.41031	-0.031427	0.0320063		0.41016	-0.133863	0.062289
0.410981	1.4949	0.581058		0.411013	-0.000275	0.0125205		0.4109	-0.233999	0.0439835		0.411143	-0.030543	0.0320704		0.410992	-0.134121	0.0622712
0.411813	1.49921	0.581218		0.411845	-0.000463	0.0125155		0.411732	-0.234144	0.0439742		0.411975	-0.030511	0.0320727		0.411824	-0.1356	0.0621693
0.412645	1.50091	0.581281		0.412677	-0.000212	0.0125222		0.412564	-0.235053	0.043916		0.412807	-0.030026	0.0321078		0.412656	-0.136829	0.0620846
0.413477	1.50368	0.581384		0.413509	0.000233	0.012534		0.413396	-0.236252	0.0438392		0.413639	-0.029975	0.0321115		0.413488	-0.136919	0.0620784
0.414309	1.50602	0.58147		0.414341	0.001397	0.0125649		0.414227	-0.236185	0.0438435		0.414472	-0.028448	0.0322222		0.41432	-0.136286	0.062122
0.415141	1.50741	0.581522		0.415173	0.001497	0.0125676		0.415059	-0.237137	0.0437825		0.415304	-0.026231	0.0323829		0.415152	-0.136574	0.0621022
0.415973	1.51134	0.581667		0.416005	0.00108	0.0125565		0.415891	-0.238353	0.0437047		0.416136	-0.025424	0.0324414		0.415983	-0.136543	0.0621043
0.416805	1.51569	0.581828		0.416837	0.001389	0.0125647		0.416723	-0.238273	0.0437098		0.416969	-0.023974	0.0325465		0.416815	-0.135496	0.0621764
0.417637	1.51711	0.581881		0.417669	5.1e-05	0.0125292		0.417554	-0.23705	0.0437881		0.417801	-0.023142	0.0326068		0.417647	-0.135125	0.062202
0.418469	1.52244	0.582078		0.418501	0.000466	0.0125402		0.418386	-0.235782	0.0438693		0.418633	-0.022097	0.0326826		0.418479	-0.135819	0.0621542
0.419301	1.52541	0.582188		0.419333	0.0009	0.0125517		0.419218	-0.236199	0.0438426		0.419465	-0.021403	0.0327329		0.419311	-0.135761	0.0621582
0.420133	1.52769	0.582273		0.420165	-0.00054	0.0125135		0.42005	-0.236845	0.0438012		0.420298	-0.021803	0.0327039		0.420143	-0.135399	0.0621831
0.420965	1.5294	0.582336		0.420997	-0.003501	0.0124349		0.420882	-0.236988	0.0437921		0.42113	-0.020957	0.0327652		0.420975	-0.134836	0.0622219
0.421797	1.533	0.582469		0.421829	-0.004646	0.0124045		0.421713	-0.23661	0.0438163		0.421962	-0.020393	0.0328061		0.421807	-0.135319	0.0621886
0.422628	1.53653	0.5826		0.422661	-0.003116	0.0124451		0.422545	-0.235794	0.0438685		0.422794	-0.020175	0.0328219		0.422639	-0.135324	0.0621883
0.42346	1.53961	0.582714		0.423493	-0.002847	0.0124522		0.423377	-0.235249	0.0439034		0.423627	-0.020436	0.032803		0.423471	-0.134209	0.0622651
0.424292	1.54195	0.582801		0.424325	-0.002884	0.0124512		0.424209	-0.234732	0.0439365		0.424459	-0.020861	0.0327722		0.424303	-0.132989	0.0623492
0.425124	1.54518	0.58292		0.425157	-0.002931	0.01245		0.425041	-0.234701	0.0439385		0.425291	-0.02022	0.0328186		0.425135	-0.132358	0.0623927
0.425956	1.54747	0.583005		0.425989	-0.00325	0.0124415		0.425872	-0.234297	0.0439644		0.426124	-0.020381	0.032807		0.425967	-0.131644	0.0624419
0.426788	1.54976	0.58309		0.426821	-0.002703	0.0124561		0.426704	-0.235278	0.0439016		0.426956	-0.020128	0.0328253		0.426799	-0.132149	0.0624071
0.42762	1.55314	0.583215		0.427653	-0.002587	0.0124591		0.427536	-0.236226	0.0438409		0.427788	-0.018212	0.0329642		0.427631	-0.13259	0.0623767
0.428452	1.55669	0.583347		0.428485	-0.002877	0.0124514		0.428368	-0.237047	0.0437883		0.42862	-0.017472	0.0330178		0.428463	-0.130998	0.0624864
0.429284	1.55927	0.583442		0.429317	-0.003266	0.0124411		0.429199	-0.237226	0.0437768		0.429453	-0.016504	0.033088		0.429295	-0.128853	0.0626342
0.430116	1.56124	0.583515		0.430149	-0.004639	0.0124046		0.430031	-0.236403	0.0438295		0.430285	-0.01616	0.0331129		0.430127	-0.128405	0.0626651
0.430948	1.56361	0.583603		0.430981	-0.004871	0.0123985		0.430863	-0.236178	0.0438439		0.431117	-0.01644	0.0330926		0.430959	-0.128075	0.0626878
0.43178	1.56683	0.583722		0.431813	-0.00453	0.0124075		0.431695	-0.237315	0.0437711		0.431949	-0.01518	0.033184		0.431791	-0.127713	0.0627127
0.432612	1.56956	0.583823		0.432645	-0.004428	0.0124102		0.432527	-0.237093	0.0437854		0.432782	-0.015344	0.0331721		0.432623	-0.1283	0.0626723
0.433444	1.57335	0.583964		0.433477	-0.004707	0.0124028		0.433358	-0.236377	0.0438312		0.433614	-0.014958	0.0332001		0.433455	-0.128488	0.0626593
0.434276	1.57736	0.584112		0.434309	-0.00537	0.0123852		0.43419	-0.235623	0.0438795		0.434446	-0.015286	0.0331763		0.434287	-0.129603	0.0625825
0.435108	1.58105	0.584249		0.435141	-0.005928	0.0123704		0.435022	-0.236868	0.0437998		0.435279	-0.014715	0.0332177		0.435119	-0.130868	0.0624953
0.43594	1.58427	0.584368		0.435973	-0.005409	0.0123842		0.435854	-0.238914	0.0436688		0.436111	-0.015534	0.0331583		0.435951	-0.131627	0.062443
0.436772	1.58584	0.584426		0.436805	-0.003982	0.0124221		0.436685	-0.23956	0.0436274		0.436943	-0.014853	0.0332077		0.436783	-0.132207	0.0624031
0.437604	1.58742	0.584485		0.437637	-0.00326	0.0124413		0.437517	-0.239918	0.0436045		0.437775	-0.014467	0.0332357		0.437615	-0.132453	0.0623861
0.438435	1.59187	0.584649		0.438469	-0.003057	0.0124467		0.438349	-0.241691	0.043491		0.438608	-0.015651	0.0331498		0.438447	-0.133374	0.0623227
0.439267	1.59275	0.584682		0.439301	-0.004062	0.01242		0.439181	-0.242582	0.0434339		0.43944	-0.016431	0.0330933		0.439279	-0.133071	0.0623435
0.440099	1.59488	0.584761		0.440133	-0.00403	0.0124208		0.440013	-0.241875	0.0434792		0.440272	-0.016012	0.0331237		0.440111	-0.132878	0.0623568
0.440931	1.59704	0.584841		0.440965	-0.004162	0.0124173		0.440844	-0.241259	0.0435186		0.441104	-0.015299	0.0331754		0.440942	-0.133523	0.0623124
0.441763	1.60058	0.584972		0.441797	-0.003467	0.0124358		0.441676	-0.241501	0.0435031		0.441937	-0.01447	0.0332354		0.441774	-0.133003	0.0623482
0.442595	1.603	0.585062		0.442629	-0.003346	0.012439		0.442508	-0.241065	0.043531		0.442769	-0.014926	0.0332024		0.442606	-0.132355	0.0623929
0.443427	1.60572	0.585162		0.443461	-0.005178	0.0123903		0.44334	-0.24145	0.0435064		0.443601	-0.015604	0.0331532		0.443438	-0.133259	0.0623306
0.444259	1.60929	0.585295		0.444293	-0.006075	0.0123665		0.444171	-0.242513	0.0434383		0.444434	-0.015717	0.0331451		0.44427	-0.135592	0.0621698
0.445091	1.61203	0.585396		0.445125	-0.007189	0.0123369		0.445003	-0.243631	0.0433667		0.445266	-0.014314	0.0332468		0.445102	-0.138309	0.0619826
0.445923	1.61468	0.585494		0.445957	-0.008407	0.0123046		0.445835	-0.245021	0.0432777		0.446098	-0.014342	0.0332447		0.445934	-0.13969	0.0618874
0.446755	1.61762	0.585603		0.446789	-0.009701	0.0122702		0.446667	-0.246052	0.0432117		0.44693	-0.014488	0.0332341		0.446766	-0.140238	0.0618497
0.447587	1.62056	0.585712		0.447621	-0.01097	0.0122365		0.447499	-0.245881	0.0432227		0.447763	-0.015608	0.033153		0.447598	-0.140695	0.0618182
0.448419	1.6241	0.585843		0.448453	-0.012497	0.012196		0.44833	-0.246631	0.0431747		0.448595	-0.015308	0.0331747		0.44843	-0.140956	0.0618002
0.449251	1.62659	0.585935		0.449285	-0.013283	0.0121751		0.449162	-0.246285	0.0431968		0.449427	-0.015437	0.0331654		0.449262	-0.141994	0.0617287
0.450083	1.62991	0.586058		0.450117	-0.014585	0.0121405		0.449994	-0.246555	0.0431795		0.450259	-0.015965	0.0331271		0.450094	-0.143654	0.0616143
0.450915	1.63134	0.586111		0.450949	-0.012578	0.0121938		0.450826	-0.247654	0.0431092		0.451092	-0.017121	0.0330433		0.450926	-0.144859	0.0615313
0.451747	1.63446	0.586227		0.451781	-0.012597	0.0121933		0.451658	-0.247507	0.0431186		0.451924	-0.017129	0.0330427		0.451758	-0.145733	0.061471
0.452579	1.6377	0.586347		0.452613	-0.01433	0.0121473		0.452489	-0.246918	0.0431563		0.452756	-0.018564	0.0329387		0.45259	-0.146566	0.0614136
0.45341	1.64005	0.586433		0.453445	-0.015206	0.012124		0.453321	-0.247892	0.0430939		0.453589	-0.018057	0.0329754		0.453422	-0.14649	0.0614189
0.454242	1.64173	0.586496		0.454277	-0.0157	0.0121109		0.454153	-0.249229	0.0430083		0.454421	-0.017832	0.0329917		0.454254	-0.146128	0.0614438
0.455074	1.64384	0.586574		0.455109	-0.016349	0.0120937		0.454985	-0.250672	0.0429159		0.455253	-0.017369	0.0330253		0.455086	-0.145807	0.0614659
0.455906	1.64681	0.586684		0.455941	-0.017226	0.0120704		0.455816	-0.250252	0.0429428		0.456085	-0.018837	0.0329189		0.455918	-0.145391	0.0614946
0.456738	1.64971	0.586791		0.456773	-0.018965	0.0120242		0.456648	-0.24953	0.042989		0.456918	-0.018952	0.0329106		0.45675	-0.145286	0.0615018
0.45757	1.6529	0.586909		0.457605	-0.019712	0.0120044		0.45748	-0.250301	0.0429397		0.45775	-0.018595	0.0329364		0.457582	-0.144914	0.0615275
0.458402	1.65579	0.587016		0.458437	-0.020914	0.0119725		0.458312	-0.251107	0.0428881		0.458582	-0.018294	0.0329583		0.458414	-0.144776	0.061537
0.459234	1.65758	0.587083		0.459269	-0.020416	0.0119857		0.459144	-0.25021	0.0429455		0.459414	-0.018768	0.0329239		0.459246	-0.145328	0.061499
0.460066	1.66243	0.587262		0.460101	-0.020111	0.0119938		0.459975	-0.251133	0.0428864		0.460247	-0.018467	0.0329457		0.460078	-0.146137	0.0614432
0.460898	1.66611	0.587399		0.460933	-0.022308	0.0119355		0.460807	-0.252418	0.0428041		0.461079	-0.019253	0.0328887		0.46091	-0.146775	0.0613992
0.46173	1.66851	0.587487		0.461765	-0.02298	0.0119176		0.461639	-0.252849	0.0427765		0.461911	-0.019743	0.0328532		0.461742	-0.14723	0.0613679
0.462562	1.67229	0.587627		0.462597	-0.023473	0.0119045		0.462471	-0.252455	0.0428018		0.462744	-0.020297	0.0328131		0.462574	-0.147962	0.0613175
0.463394	1.67446	0.587708		0.46343	-0.024158	0.0118863		0.463302	-0.253531	0.0427329		0.463576	-0.019536	0.0328682		0.463406	-0.148396	0.0612875
0.464226	1.67636	0.587778		0.464262	-0.024709	0.0118717		0.464134	-0.255146	0.0426295		0.464408	-0.018309	0.0329572		0.464238	-0.147926	0.0613199
0.465058	1.67607	0.587767		0.465094	-0.025296	0.0118561		0.464966	-0.25499	0.0426394		0.46524	-0.018413	0.0329496		0.46507	-0.14712	0.0613755
0.46589	1.67902	0.587877		0.465926	-0.025143	0.0118602		0.465798	-0.255201	0.0426259		0.466073	-0.019378	0.0328797		0.465902	-0.146488	0.061419
0.466722	1.68273	0.588014		0.466758	-0.02645	0.0118255		0.46663	-0.25537	0.0426151		0.466905	-0.01862	0.0329346		0.466733	-0.14696	0.0613865
0.467554	1.68552	0.588117		0.46759	-0.026194	0.0118323		0.467461	-0.255392	0.0426137		0.467737	-0.018333	0.0329554		0.467565	-0.148018	0.0613136
0.468385	1.68838	0.588223		0.468422	-0.026869	0.0118143		0.468293	-0.256341	0.0425529		0.468569	-0.017676	0.0330031		0.468397	-0.148752	0.061263
0.469217	1.69048	0.588301		0.469254	-0.027483	0.011798		0.469125	-0.2568	0.0425235		0.469402	-0.017333	0.0330279		0.469229	-0.149187	0.061233
0.470049	1.69303	0.588395		0.470086	-0.027872	0.0117877		0.469957	-0.257011	0.04251		0.470234	-0.016929	0.0330572		0.470061	-0.149781	0.0611921
0.470881	1.69529	0.588479		0.470918	-0.026996	0.011811		0.470789	-0.25696	0.0425133		0.471066	-0.016757	0.0330697		0.470893	-0.149552	0.0612079
0.471713	1.69981	0.588646		0.47175	-0.02839	0.011774		0.47162	-0.257204	0.0424977		0.471899	-0.015479	0.0331623		0.471725	-0.150324	0.0611547
0.472545	1.70202	0.588728		0.472582	-0.029731	0.0117383		0.472452	-0.258361	0.0424236		0.472731	-0.014269	0.03325		0.472557	-0.151186	0.0610953
0.473377	1.70452	0.588821		0.473414	-0.028385	0.0117741		0.473284	-0.26003	0.0423167		0.473563	-0.01309	0.0333355		0.473389	-0.151742	0.061057
0.474209	1.70794	0.588948		0.474246	-0.028254	0.0117776		0.474116	-0.262073	0.0421859		0.474395	-0.012755	0.0333598		0.474221	-0.151004	0.0611078
0.475041	1.71077	0.589052		0.475078	-0.028978	0.0117583		0.474947	-0.262695	0.0421461		0.475228	-0.012445	0.0333822		0.475053	-0.15035	0.0611529
0.475873	1.71396	0.589171		0.47591	-0.028723	0.0117651		0.475779	-0.26159	0.0422169		0.47606	-0.012104	0.033407		0.475885	-0.150763	0.0611244
0.476705	1.71511	0.589213		0.476742	-0.028953	0.011759		0.476611	-0.261482	0.0422238		0.476892	-0.010383	0.0335317		0.476717	-0.151394	0.061081
0.477537	1.71789	0.589316		0.477574	-0.029131	0.0117543		0.477443	-0.261683	0.0422109		0.477724	-0.009653	0.0335846		0.477549	-0.152255	0.0610216
0.478369	1.7206	0.589416		0.478406	-0.030573	0.011716		0.478275	-0.261865	0.0421992		0.478557	-0.010438	0.0335277		0.478381	-0.153461	0.0609385
0.479201	1.72389	0.589538		0.479238	-0.031888	0.0116811		0.479106	-0.263041	0.0421239		0.479389	-0.010541	0.0335202		0.479213	-0.155171	0.0608207
0.480033	1.72709	0.589657		0.48007	-0.032961	0.0116526		0.479938	-0.264059	0.0420588		0.480221	-0.008382	0.0336767		0.480045	-0.155547	0.0607948
0.480865	1.73043	0.589781		0.480902	-0.033463	0.0116392		0.48077	-0.264697	0.0420179		0.481054	-0.008778	0.033648		0.480877	-0.156036	0.0607611
0.481697	1.73238	0.589853		0.481734	-0.033907	0.0116275		0.481602	-0.265553	0.0419631		0.481886	-0.008151	0.0336935		0.481709	-0.155776	0.060779
0.482529	1.73554	0.58997		0.482566	-0.03446	0.0116128		0.482433	-0.26602	0.0419332		0.482718	-0.007038	0.0337742		0.482541	-0.154839	0.0608436
0.48336	1.73759	0.590046		0.483398	-0.036014	0.0115715		0.483265	-0.266435	0.0419066		0.48355	-0.006762	0.0337942		0.483373	-0.156205	0.0607495
0.484192	1.74173	0.590199		0.48423	-0.037404	0.0115346		0.484097	-0.266814	0.0418824		0.484383	-0.007719	0.0337248		0.484205	-0.158006	0.0606254
0.485024	1.74386	0.590278		0.485062	-0.03843	0.0115074		0.484929	-0.266296	0.0419155		0.485215	-0.007874	0.0337136		0.485037	-0.158451	0.0605947
0.485856	1.74849	0.590449		0.485894	-0.039095	0.0114897		0.485761	-0.267053	0.0418671		0.486047	-0.008216	0.0336888		0.485869	-0.159113	0.0605491
0.486688	1.75255	0.5906		0.486726	-0.039749	0.0114723		0.486592	-0.267574	0.0418337		0.486879	-0.007641	0.0337305		0.486701	-0.15954	0.0605197
0.48752	1.75473	0.59068		0.487558	-0.040029	0.0114649		0.487424	-0.26655	0.0418993		0.487712	-0.008258	0.0336857		0.487533	-0.159207	0.0605426
0.488352	1.75701	0.590765		0.48839	-0.04131	0.0114309		0.488256	-0.266763	0.0418856		0.488544	-0.007833	0.0337165		0.488365	-0.159263	0.0605387
0.489184	1.75869	0.590827		0.489222	-0.042181	0.0114078		0.489088	-0.267411	0.0418441		0.489376	-0.008472	0.0336702		0.489197	-0.158893	0.0605642
0.490016	1.76104	0.590914		0.490054	-0.042258	0.0114057		0.489919	-0.267935	0.0418106		0.490209	-0.008482	0.0336695		0.490029	-0.159219	0.0605418
0.490848	1.76299	0.590986		0.490886	-0.043174	0.0113814		0.490751	-0.268833	0.0417531		0.491041	-0.009784	0.0335751		0.490861	-0.15958	0.0605169
0.49168	1.76457	0.591045		0.491718	-0.044793	0.0113384		0.491583	-0.268783	0.0417563		0.491873	-0.00911	0.033624		0.491692	-0.160756	0.0604359
0.492512	1.76707	0.591137		0.49255	-0.04578	0.0113122		0.492415	-0.26887	0.0417507		0.492705	-0.008351	0.033679		0.492524	-0.160885	0.060427
0.493344	1.76985	0.59124		0.493382	-0.046464	0.011294		0.493247	-0.269863	0.0416871		0.493538	-0.009332	0.0336079		0.493356	-0.161327	0.0603965
0.494176	1.77204	0.591321		0.494214	-0.04808	0.0112511		0.494078	-0.269986	0.0416793		0.49437	-0.008569	0.0336632		0.494188	-0.162172	0.0603383
0.495008	1.77473	0.591421		0.495046	-0.049595	0.0112109		0.49491	-0.2683	0.0417872		0.495202	-0.008256	0.0336859		0.49502	-0.164817	0.060156
0.49584	1.7769	0.591501		0.495878	-0.050988	0.0111739		0.495742	-0.26727	0.0418532		0.496034	-0.008197	0.0336902		0.495852	-0.165844	0.0600853
0.496672	1.77858	0.591563		0.49671	-0.053338	0.0111115		0.496574	-0.268101	0.0418		0.496867	-0.007877	0.0337134		0.496684	-0.166129	0.0600656
0.497504	1.78105	0.591655		0.497542	-0.054655	0.0110765		0.497406	-0.267847	0.0418162		0.497699	-0.008355	0.0336787		0.497516	-0.166682	0.0600275
0.498336	1.78211	0.591694		0.498374	-0.055711	0.0110485		0.498237	-0.268467	0.0417765		0.498531	-0.01053	0.033521		0.498348	-0.167255	0.059988
0.499167	1.78452	0.591783		0.499206	-0.056595	0.011025		0.499069	-0.268722	0.0417602		0.499364	-0.009899	0.0335668		0.49918	-0.167609	0.0599636
0.499999	1.78622	0.591846		0.500038	-0.05608	0.0110387		0.499901	-0.268593	0.0417685		0.500196	-0.010961	0.0334898		0.500012	-0.167243	0.0599889
0.500831	1.78862	0.591935		0.50087	-0.057064	0.0110125		0.500733	-0.269254	0.0417261		0.501028	-0.012912	0.0333484		0.500844	-0.167085	0.0599998
0.501663	1.79066	0.592011		0.501702	-0.058735	0.0109682		0.501564	-0.268924	0.0417473		0.50186	-0.012905	0.0333489		0.501676	-0.16731	0.0599842
0.502495	1.79412	0.592139		0.502534	-0.060143	0.0109308		0.502396	-0.267494	0.0418388		0.502693	-0.014461	0.0332361		0.502508	-0.167675	0.0599591
0.503327	1.79636	0.592222		0.503366	-0.061179	0.0109033		0.503228	-0.26683	0.0418813		0.503525	-0.015499	0.0331609		0.50334	-0.169101	0.0598608
0.504159	1.79777	0.592274		0.504198	-0.060646	0.0109174		0.50406	-0.267019	0.0418692		0.504357	-0.015505	0.0331604		0.504172	-0.168548	0.0598989
0.504991	1.79918	0.592326		0.50503	-0.060741	0.0109149		0.504892	-0.267699	0.0418257		0.505189	-0.014619	0.0332246		0.505004	-0.167018	0.0600044
0.505823	1.80211	0.592435		0.505862	-0.060428	0.0109232		0.505723	-0.268249	0.0417905		0.506022	-0.013611	0.0332977		0.505836	-0.166821	0.0600179
0.506655	1.80385	0.592499		0.506694	-0.06042	0.0109234		0.506555	-0.267843	0.0418165		0.506854	-0.012347	0.0333893		0.506668	-0.167052	0.060002
0.507487	1.8052	0.592549		0.507526	-0.061028	0.0109073		0.507387	-0.268848	0.0417521		0.507686	-0.012208	0.0333994		0.5075	-0.167507	0.0599707
0.508319	1.80789	0.592649		0.508358	-0.061147	0.0109041		0.508219	-0.270288	0.0416599		0.508519	-0.012314	0.0333917		0.508332	-0.168193	0.0599234
0.509151	1.8096	0.592712		0.50919	-0.062512	0.0108679		0.50905	-0.270128	0.0416702		0.509351	-0.011934	0.0334193		0.509164	-0.168764	0.0598841
0.509983	1.81415	0.592881		0.510022	-0.063744	0.0108352		0.509882	-0.270125	0.0416704		0.510183	-0.010716	0.0335076		0.509996	-0.169278	0.0598486
0.510815	1.8175	0.593005		0.510854	-0.063896	0.0108311		0.510714	-0.269803	0.041691		0.511015	-0.010727	0.0335068		0.510828	-0.1696	0.0598265
0.511647	1.82058	0.593119		0.511686	-0.064529	0.0108143		0.511546	-0.269065	0.0417382		0.511848	-0.009022	0.0336304		0.51166	-0.169194	0.0598544
0.512479	1.82492	0.593279		0.512518	-0.065443	0.01079		0.512378	-0.269012	0.0417416		0.51268	-0.00911	0.033624		0.512492	-0.169306	0.0598467
0.513311	1.82707	0.593359		0.51335	-0.066412	0.0107643		0.513209	-0.268761	0.0417577		0.513512	-0.00911	0.033624		0.513324	-0.169299	0.0598472
0.514143	1.82968	0.593456		0.514182	-0.066857	0.0107525		0.514041	-0.26805	0.0418032		0.514344	-0.009545	0.0335924		0.514156	-0.16842	0.0599078
0.514974	1.83239	0.593556		0.515014	-0.067308	0.0107405		0.514873	-0.268006	0.041806		0.515177	-0.009279	0.0336117		0.514988	-0.16765	0.0599608
0.515806	1.83405	0.593618		0.515846	-0.068899	0.0106983		0.515705	-0.269056	0.0417388		0.516009	-0.008355	0.0336787		0.51582	-0.166787	0.0600203
0.516638	1.83701	0.593727		0.516678	-0.070233	0.0106629		0.516537	-0.270002	0.0416782		0.516841	-0.008949	0.0336356		0.516652	-0.16675	0.0600228
0.51747	1.83841	0.593779		0.51751	-0.070905	0.010645		0.517368	-0.270239	0.0416631		0.517674	-0.008869	0.0336414		0.517483	-0.167394	0.0599785
0.518302	1.84149	0.593893		0.518342	-0.072623	0.0105994		0.5182	-0.271426	0.0415871		0.518506	-0.008464	0.0336708		0.518315	-0.167199	0.0599919
0.519134	1.84604	0.594062		0.519174	-0.073533	0.0105752		0.519032	-0.271164	0.0416038		0.519338	-0.005942	0.0338536		0.519147	-0.166662	0.0600289
0.519966	1.84858	0.594156		0.520006	-0.073353	0.01058		0.519864	-0.271013	0.0416135		0.52017	-0.004563	0.0339536		0.519979	-0.166413	0.0600461
0.520798	1.85141	0.594261		0.520838	-0.074077	0.0105608		0.520695	-0.271109	0.0416074		0.521003	-0.003726	0.0340142		0.520811	-0.167653	0.0599606
0.52163	1.85403	0.594358		0.52167	-0.074195	0.0105576		0.521527	-0.27102	0.0416131		0.521835	-0.004337	0.03397		0.521643	-0.168406	0.0599087
0.522462	1.85642	0.594446		0.522502	-0.074529	0.0105488		0.522359	-0.271403	0.0415885		0.522667	-0.003091	0.0340603		0.522475	-0.168654	0.0598916
0.523294	1.85862	0.594528		0.523334	-0.074971	0.010537		0.523191	-0.272218	0.0415364		0.523499	-0.002001	0.0341393		0.523307	-0.169179	0.0598555
0.524126	1.86249	0.594671		0.524166	-0.076082	0.0105075		0.524023	-0.27314	0.0414773		0.524332	-0.00174	0.0341582		0.524139	-0.169441	0.0598374
0.524958	1.8656	0.594786		0.524998	-0.078416	0.0104456		0.524854	-0.273147	0.0414769		0.525164	-0.000839	0.0342235		0.524971	-0.170943	0.0597339
0.52579	1.86751	0.594857		0.52583	-0.080184	0.0103986		0.525686	-0.272412	0.0415239		0.525996	-0.001567	0.0341707		0.525803	-0.172774	0.0596077
0.526622	1.87118	0.594993		0.526662	-0.081483	0.0103641		0.526518	-0.271743	0.0415668		0.526829	-0.002065	0.0341347		0.526635	-0.174185	0.0595105
0.527454	1.87367	0.595085		0.527494	-0.081712	0.010358		0.52735	-0.270979	0.0416157		0.527661	-0.002539	0.0341003		0.527467	-0.174139	0.0595137
0.528286	1.87621	0.595179		0.528326	-0.082325	0.0103418		0.528181	-0.270857	0.0416235		0.528493	-0.003756	0.0340121		0.528299	-0.173142	0.0595824
0.529118	1.87873	0.595272		0.529158	-0.083403	0.0103131		0.529013	-0.270359	0.0416554		0.529325	-0.003916	0.0340005		0.529131	-0.173025	0.0595904
0.529949	1.88155	0.595377		0.52999	-0.083075	0.0103218		0.529845	-0.271103	0.0416078		0.530158	-0.004238	0.0339771		0.529963	-0.173645	0.0595477
0.530781	1.88282	0.595424		0.530822	-0.083162	0.0103195		0.530677	-0.271788	0.0415639		0.53099	-0.004422	0.0339638		0.530795	-0.173909	0.0595295
0.531613	1.88564	0.595528		0.531654	-0.08464	0.0102803		0.531509	-0.272184	0.0415385		0.531822	-0.005103	0.0339144		0.531627	-0.174295	0.0595029
0.532445	1.88863	0.595639		0.532486	-0.085518	0.010257		0.53234	-0.27217	0.0415394		0.532654	-0.005258	0.0339032		0.532459	-0.174773	0.05947
0.533277	1.89077	0.595718		0.533318	-0.086151	0.0102402		0.533172	-0.272323	0.0415296		0.533487	-0.00441	0.0339647		0.533291	-0.174653	0.0594783
0.534109	1.89301	0.595801		0.53415	-0.088055	0.0101896		0.534004	-0.272224	0.041536		0.534319	-0.00414	0.0339842		0.534123	-0.173881	0.0595315
0.534941	1.89539	0.595889		0.534982	-0.090142	0.0101342		0.534836	-0.272209	0.0415369		0.535151	-0.002797	0.0340816		0.534955	-0.173486	0.0595587
0.535773	1.89776	0.595977		0.535814	-0.09086	0.0101151		0.535667	-0.272609	0.0415113		0.535984	-0.003485	0.0340317		0.535787	-0.174039	0.0595206
0.536605	1.90042	0.596076		0.536646	-0.09075	0.010118		0.536499	-0.273327	0.0414654		0.536816	-0.005373	0.0338949		0.536619	-0.174515	0.0594878
0.537437	1.90283	0.596165		0.537478	-0.090203	0.0101326		0.537331	-0.273346	0.0414641		0.537648	-0.004748	0.0339402		0.537451	-0.174168	0.0595117
0.538269	1.90662	0.596305		0.53831	-0.089692	0.0101461		0.538163	-0.27285	0.0414959		0.53848	-0.005046	0.0339186		0.538283	-0.173765	0.0595395
0.539101	1.90958	0.596415		0.539142	-0.089099	0.0101619		0.538995	-0.272656	0.0415083		0.539313	-0.005465	0.0338882		0.539115	-0.173819	0.0595357
0.539933	1.91139	0.596482		0.539974	-0.089024	0.0101639		0.539826	-0.273039	0.0414838		0.540145	-0.006897	0.0337844		0.539947	-0.172667	0.0596151
0.540765	1.91354	0.596561		0.540806	-0.089354	0.0101551		0.540658	-0.274251	0.0414062		0.540977	-0.007676	0.0337279		0.540779	-0.172235	0.0596449
0.541597	1.91522	0.596624		0.541638	-0.089623	0.010148		0.54149	-0.273917	0.0414276		0.541809	-0.008809	0.0336458		0.54161	-0.171599	0.0596887
0.542429	1.91717	0.596696		0.54247	-0.090614	0.0101217		0.542322	-0.274126	0.0414142		0.542642	-0.006869	0.0337864		0.542443	-0.170547	0.0597612
0.543261	1.91867	0.596751		0.543302	-0.091331	0.0101026		0.543154	-0.274143	0.0414131		0.543474	-0.005983	0.0338506		0.543274	-0.169844	0.0598096
0.544093	1.92051	0.596819		0.544134	-0.091683	0.0100933		0.543985	-0.274221	0.0414081		0.544306	-0.005084	0.0339158		0.544106	-0.169481	0.0598347
0.544924	1.92213	0.596879		0.544966	-0.09211	0.0100819		0.544817	-0.275018	0.0413571		0.545139	-0.00601	0.0338487		0.544938	-0.16877	0.0598836
0.545756	1.92462	0.596971		0.545798	-0.090553	0.0101233		0.545649	-0.276103	0.0412876		0.545971	-0.006505	0.0338128		0.54577	-0.168045	0.0599336
0.546588	1.92709	0.597063		0.546631	-0.089075	0.0101625		0.546481	-0.27766	0.0411879		0.546803	-0.006636	0.0338033		0.546602	-0.167128	0.0599968
0.54742	1.92873	0.597124		0.547463	-0.089847	0.010142		0.547312	-0.278315	0.041146		0.547635	-0.007124	0.0337679		0.547434	-0.166173	0.0600626
0.548252	1.93142	0.597223		0.548295	-0.091015	0.010111		0.548144	-0.278425	0.0411389		0.548468	-0.006189	0.0338357		0.548266	-0.1665	0.0600401
0.549084	1.93456	0.59734		0.549127	-0.092499	0.0100716		0.548976	-0.277934	0.0411704		0.5493	-0.005179	0.0339089		0.549098	-0.16671	0.0600256
0.549916	1.93693	0.597428		0.549959	-0.094145	0.0100279		0.549808	-0.27804	0.0411636		0.550132	-0.005476	0.0338874		0.54993	-0.166037	0.060072
0.550748	1.93898	0.597503		0.550791	-0.095235	0.00999895		0.55064	-0.278128	0.041158		0.550964	-0.005883	0.0338579		0.550762	-0.165525	0.0601072
0.55158	1.9398	0.597534		0.551623	-0.095213	0.00999953		0.551471	-0.278097	0.0411599		0.551797	-0.006302	0.0338275		0.551594	-0.16501	0.0601427
0.552412	1.94155	0.597598		0.552455	-0.09516	0.0100009		0.552303	-0.278152	0.0411564		0.552629	-0.006313	0.0338267		0.552426	-0.164394	0.0601852
0.553244	1.94391	0.597686		0.553287	-0.096175	0.00997398		0.553135	-0.279188	0.0410901		0.553461	-0.006633	0.0338035		0.553258	-0.164619	0.0601697
0.554076	1.94531	0.597738		0.554119	-0.096629	0.00996193		0.553967	-0.280245	0.0410224		0.554294	-0.007016	0.0337758		0.55409	-0.16471	0.0601634
0.554908	1.94687	0.597796		0.554951	-0.096145	0.00997478		0.554798	-0.282111	0.0409029		0.555126	-0.007576	0.0337352		0.554922	-0.165496	0.0601092
0.55574	1.9487	0.597863		0.555783	-0.096079	0.00997653		0.55563	-0.282858	0.0408551		0.555958	-0.008508	0.0336676		0.555754	-0.166313	0.0600529
0.556572	1.95034	0.597924		0.556615	-0.096889	0.00995502		0.556462	-0.282761	0.0408613		0.55679	-0.008928	0.0336372		0.556586	-0.16633	0.0600518
0.557404	1.95324	0.598031		0.557447	-0.097234	0.00994586		0.557294	-0.282695	0.0408655		0.557623	-0.007488	0.0337416		0.557418	-0.165265	0.0601252
0.558236	1.95584	0.598128		0.558279	-0.097825	0.00993017		0.558126	-0.284103	0.0407754		0.558455	-0.008224	0.0336882		0.55825	-0.16501	0.0601427
0.559068	1.95759	0.598192		0.559111	-0.098574	0.00991028		0.558957	-0.2853	0.0406987		0.559287	-0.007335	0.0337526		0.559082	-0.166168	0.0600629
0.5599	1.96009	0.598285		0.559943	-0.099423	0.00988774		0.559789	-0.285085	0.0407125		0.560119	-0.006918	0.0337829		0.559914	-0.166417	0.0600458
0.560731	1.96264	0.598379		0.560775	-0.100071	0.00987053		0.560621	-0.284082	0.0407767		0.560952	-0.006631	0.0338037		0.560746	-0.167105	0.0599984
0.561563	1.9653	0.598478		0.561607	-0.100936	0.00984756		0.561453	-0.282887	0.0408532		0.561784	-0.005764	0.0338665		0.561578	-0.168125	0.0599281
0.562395	1.96894	0.598613		0.562439	-0.101197	0.00984063		0.562285	-0.282708	0.0408647		0.562616	-0.004714	0.0339426		0.56241	-0.167953	0.0599399
0.563227	1.97127	0.598699		0.563271	-0.100624	0.00985584		0.563116	-0.282054	0.0409066		0.563449	-0.005156	0.0339106		0.563242	-0.168891	0.0598753
0.564059	1.97381	0.598793		0.564103	-0.100989	0.00984615		0.563948	-0.282095	0.040904		0.564281	-0.005816	0.0338628		0.564074	-0.168647	0.0598921
0.564891	1.97655	0.598895		0.564935	-0.101357	0.00983638		0.56478	-0.281695	0.0409296		0.565113	-0.007124	0.0337679		0.564906	-0.168087	0.0599307
0.565723	1.97957	0.599006		0.565767	-0.102045	0.00981811		0.565612	-0.281218	0.0409601		0.565945	-0.00522	0.033906		0.565738	-0.16869	0.0598892
0.566555	1.98159	0.599081		0.566599	-0.10425	0.00975956		0.566443	-0.281504	0.0409418		0.566778	-0.006445	0.0338172		0.56657	-0.169127	0.059859
0.567387	1.98386	0.599165		0.567431	-0.105707	0.00972087		0.567275	-0.282145	0.0409008		0.56761	-0.005474	0.0338875		0.567401	-0.168017	0.0599355
0.568219	1.98591	0.599241		0.568263	-0.104994	0.0097398		0.568107	-0.282557	0.0408744		0.568442	-0.005	0.0339219		0.568233	-0.168615	0.0598943
0.569051	1.98721	0.599289		0.569095	-0.104308	0.00975802		0.568939	-0.282158	0.0408999		0.569274	-0.005778	0.0338655		0.569065	-0.169726	0.0598178
0.569883	1.98848	0.599336		0.569927	-0.103809	0.00977127		0.569771	-0.281843	0.0409201		0.570107	-0.005319	0.0338988		0.569897	-0.169512	0.0598325
0.570715	1.99052	0.599412		0.570759	-0.103647	0.00977557		0.570602	-0.281969	0.040912		0.570939	-0.004365	0.0339679		0.570729	-0.170698	0.0597508
0.571547	1.99256	0.599487		0.571591	-0.103816	0.00977108		0.571434	-0.282793	0.0408593		0.571771	-0.003292	0.0340457		0.571561	-0.170655	0.0597538
0.572379	1.99735	0.599665		0.572423	-0.104556	0.00975143		0.572266	-0.282911	0.0408517		0.572604	-0.002049	0.0341358		0.572393	-0.170183	0.0597863
0.573211	2.00014	0.599768		0.573255	-0.105207	0.00973415		0.573098	-0.282585	0.0408726		0.573436	-0.002437	0.0341077		0.573225	-0.170431	0.0597692
0.574043	2.00235	0.59985		0.574087	-0.105883	0.0097162		0.573929	-0.282613	0.0408708		0.574268	-0.000527	0.0342461		0.574057	-0.170301	0.0597781
0.574875	2.00467	0.599936		0.574919	-0.106174	0.00970847		0.574761	-0.282321	0.0408895		0.5751	-0.001437	0.0341802		0.574889	-0.170223	0.0597835
0.575706	2.00708	0.600025		0.575751	-0.105819	0.0097179		0.575593	-0.281534	0.0409399		0.575933	-0.000354	0.0342587		0.575721	-0.170462	0.0597671
0.576538	2.01087	0.600166		0.576583	-0.10582	0.00971787		0.576425	-0.281586	0.0409365		0.576765	0.00064	0.0343307		0.576553	-0.170463	0.059767
0.57737	2.01254	0.600228		0.577415	-0.105693	0.00972124		0.577257	-0.281491	0.0409426		0.577597	-0.000477	0.0342498		0.577385	-0.170505	0.0597641
0.578202	2.01288	0.60024		0.578247	-0.106078	0.00971102		0.578088	-0.281058	0.0409704		0.578429	-0.000858	0.0342221		0.578217	-0.170941	0.059734
0.579034	2.01262	0.600231		0.579079	-0.106901	0.00968916		0.57892	-0.280487	0.0410069		0.579262	-5.8e-05	0.0342801		0.579049	-0.170808	0.0597432
0.579866	2.01444	0.600298		0.579911	-0.107139	0.00968284		0.579752	-0.280511	0.0410054		0.580094	-1.8e-05	0.034283		0.579881	-0.169512	0.0598325
0.580698	2.0154	0.600333		0.580743	-0.106814	0.00969147		0.580584	-0.281055	0.0409705		0.580926	0.000417	0.0343146		0.580713	-0.168732	0.0598863
0.58153	2.01756	0.600413		0.581575	-0.106594	0.00969732		0.581415	-0.281321	0.0409535		0.581759	0.000815	0.0343434		0.581545	-0.168153	0.0599262
0.582362	2.01986	0.600498		0.582407	-0.106782	0.00969232		0.582247	-0.282097	0.0409038		0.582591	0.000807	0.0343428		0.582377	-0.168327	0.0599142
0.583194	2.0216	0.600563		0.583239	-0.108402	0.00964931		0.583079	-0.28234	0.0408883		0.583423	-0.000258	0.0342656		0.583209	-0.168315	0.059915
0.584026	2.02411	0.600656		0.584071	-0.109916	0.0096091		0.583911	-0.283185	0.0408342		0.584255	0.001338	0.0343813		0.584041	-0.167544	0.0599681
0.584858	2.02643	0.600742		0.584903	-0.110246	0.00960034		0.584743	-0.284699	0.0407372		0.585088	-1.1e-05	0.0342835		0.584873	-0.168089	0.0599306
0.58569	2.02811	0.600804		0.585735	-0.110957	0.00958146		0.585574	-0.28557	0.0406815		0.58592	0.000364	0.0343107		0.585705	-0.167889	0.0599444
0.586522	2.02975	0.600865		0.586567	-0.111583	0.00956484		0.586406	-0.286691	0.0406097		0.586752	0.000651	0.0343315		0.586537	-0.167134	0.0599964
0.587354	2.03122	0.600919		0.587399	-0.111402	0.00956964		0.587238	-0.286904	0.040596		0.587584	0.001562	0.0343976		0.587369	-0.167489	0.0599719
0.588186	2.03276	0.600976		0.588231	-0.111265	0.00957328		0.58807	-0.285455	0.0406888		0.588417	0.00089	0.0343488		0.588201	-0.168052	0.0599331
0.589018	2.03485	0.601054		0.589063	-0.112576	0.00953847		0.588902	-0.285441	0.0406897		0.589249	0.000765	0.0343398		0.589033	-0.168087	0.0599307
0.58985	2.03756	0.601154		0.589895	-0.115113	0.0094711		0.589733	-0.287379	0.0405656		0.590081	0.001146	0.0343674		0.589865	-0.16823	0.0599209
0.590681	2.04076	0.601272		0.590727	-0.116337	0.0094386		0.590565	-0.288434	0.0404981		0.590914	0.001096	0.0343638		0.590697	-0.168952	0.0598711
0.591513	2.04366	0.60138		0.591559	-0.116206	0.00944208		0.591397	-0.288813	0.0404738		0.591746	7e-05	0.0342894		0.591529	-0.168934	0.0598723
0.592345	2.0462	0.601474		0.592391	-0.116186	0.00944261		0.592229	-0.287776	0.0405402		0.592578	-0.000155	0.0342731		0.59236	-0.169275	0.0598488
0.593177	2.04716	0.60151		0.593223	-0.116227	0.00944152		0.59306	-0.286785	0.0406037		0.59341	-0.00081	0.0342256		0.593192	-0.169805	0.0598123
0.594009	2.04765	0.601528		0.594055	-0.116827	0.00942559		0.593892	-0.286971	0.0405918		0.594243	-0.00011	0.0342764		0.594024	-0.169707	0.0598191
0.594841	2.04878	0.601569		0.594887	-0.116498	0.00943432		0.594724	-0.287154	0.04058		0.595075	-0.001062	0.0342074		0.594856	-0.169789	0.0598134
0.595673	2.05067	0.601639		0.595719	-0.11521	0.00946853		0.595556	-0.28731	0.04057		0.595907	-0.000778	0.0342279		0.595688	-0.17017	0.0597872
0.596505	2.05347	0.601743		0.596551	-0.115177	0.0094694		0.596388	-0.287375	0.0405659		0.596739	-0.000273	0.0342645		0.59652	-0.170927	0.059735
0.597337	2.05506	0.601802		0.597383	-0.11492	0.00947623		0.597219	-0.287527	0.0405562		0.597572	-0.000715	0.0342325		0.597352	-0.172398	0.0596337
0.598169	2.05761	0.601897		0.598215	-0.115122	0.00947086		0.598051	-0.288619	0.0404862		0.598404	0.000493	0.0343201		0.598184	-0.173554	0.059554
0.599001	2.06142	0.602037		0.599047	-0.115809	0.00945262		0.598883	-0.290262	0.040381		0.599236	0.001127	0.034366		0.599016	-0.17441	0.059495
0.599833	2.06532	0.602182		0.599879	-0.115359	0.00946457		0.599715	-0.29082	0.0403453		0.600069	0.001334	0.034381		0.599848	-0.174795	0.0594685
0.600665	2.06852	0.602301		0.600711	-0.115861	0.00945124		0.600546	-0.291465	0.040304		0.600901	0.000453	0.0343172		0.60068	-0.175878	0.0593939
0.601497	2.07106	0.602394		0.601543	-0.117416	0.00940995		0.601378	-0.29206	0.0402659		0.601733	0.000171	0.0342967		0.601512	-0.177135	0.0593072
0.602329	2.07296	0.602465		0.602375	-0.118695	0.00937598		0.60221	-0.293346	0.0401836		0.602565	0.00031	0.0343068		0.602344	-0.178306	0.0592266
0.603161	2.07435	0.602516		0.603207	-0.119616	0.00935153		0.603042	-0.295409	0.0400515		0.603398	-0.000361	0.0342582		0.603176	-0.179298	0.0591582
0.603993	2.07577	0.602569		0.604039	-0.119727	0.00934858		0.603874	-0.295998	0.0400138		0.60423	6.5e-05	0.034289		0.604008	-0.179841	0.0591208
0.604825	2.07738	0.602629		0.604871	-0.119574	0.00935264		0.604705	-0.296241	0.0399982		0.605062	-0.000819	0.034225		0.60484	-0.180584	0.0590696
0.605657	2.07924	0.602697		0.605703	-0.11983	0.00934585		0.605537	-0.295946	0.0400171		0.605894	-0.000995	0.0342122		0.605672	-0.181982	0.0589733
0.606488	2.08116	0.602768		0.606535	-0.119291	0.00936016		0.606369	-0.296194	0.0400012		0.606727	-0.00089	0.0342198		0.606504	-0.183192	0.0588899
0.60732	2.08331	0.602848		0.607367	-0.118874	0.00937123		0.607201	-0.295686	0.0400337		0.607559	-0.001916	0.0341455		0.607336	-0.184148	0.058824
0.608152	2.08555	0.602931		0.608199	-0.118285	0.00938687		0.608033	-0.295802	0.0400263		0.608391	-0.00207	0.0341343		0.608168	-0.183862	0.0588437
0.608984	2.08727	0.602995		0.609031	-0.117494	0.00940788		0.608864	-0.296943	0.0399533		0.609224	-0.001325	0.0341883		0.609	-0.183549	0.0588653
0.609816	2.08837	0.603035		0.609863	-0.11669	0.00942923		0.609696	-0.297033	0.0399475		0.610056	-0.001466	0.0341781		0.609832	-0.183356	0.0588786
0.610648	2.08957	0.60308		0.610695	-0.116455	0.00943547		0.610528	-0.297558	0.0399139		0.610888	-0.001658	0.0341642		0.610664	-0.182332	0.0589491
0.61148	2.09	0.603096		0.611527	-0.116724	0.00942832		0.61136	-0.297735	0.0399026		0.61172	-0.001269	0.0341923		0.611496	-0.181491	0.0590071
0.612312	2.08988	0.603091		0.612359	-0.116468	0.00943512		0.612191	-0.298095	0.0398795		0.612553	8e-05	0.0342901		0.612328	-0.181052	0.0590373
0.613144	2.0909	0.603129		0.613191	-0.115797	0.00945294		0.613023	-0.298447	0.039857		0.613385	-0.000506	0.0342477		0.61316	-0.18017	0.0590981
0.613976	2.09303	0.603208		0.614023	-0.115195	0.00946892		0.613855	-0.299109	0.0398146		0.614217	0.000126	0.0342935		0.613992	-0.179064	0.0591743
0.614808	2.09601	0.603318		0.614855	-0.113915	0.00950291		0.614687	-0.300165	0.039747		0.615049	-0.001146	0.0342013		0.614824	-0.179067	0.0591741
0.61564	2.09852	0.603411		0.615687	-0.114226	0.00949466		0.615519	-0.300918	0.0396987		0.615882	-0.002083	0.0341333		0.615656	-0.178732	0.0591972
0.616472	2.10014	0.603472		0.616519	-0.115972	0.00944829		0.61635	-0.301681	0.0396499		0.616714	-0.00275	0.034085		0.616488	-0.179681	0.0591318
0.617304	2.10123	0.603512		0.617351	-0.116709	0.00942872		0.617182	-0.302741	0.039582		0.617546	-0.003746	0.0340128		0.61732	-0.179615	0.0591364
0.618136	2.10263	0.603564		0.618183	-0.117156	0.00941685		0.618014	-0.304113	0.0394942		0.618379	-0.002948	0.0340706		0.618151	-0.178771	0.0591945
0.618968	2.10367	0.603602		0.619015	-0.117895	0.00939723		0.618846	-0.303893	0.0395083		0.619211	-0.002807	0.0340809		0.618983	-0.178327	0.0592251
0.6198	2.10511	0.603655		0.619847	-0.119611	0.00935166		0.619677	-0.302829	0.0395764		0.620043	-0.003098	0.0340598		0.619815	-0.178035	0.0592452
0.620632	2.10695	0.603724		0.620679	-0.120985	0.00931518		0.620509	-0.302835	0.039576		0.620875	-0.003516	0.0340295		0.620647	-0.177716	0.0592672
0.621464	2.10851	0.603781		0.621511	-0.120897	0.00931751		0.621341	-0.301776	0.0396438		0.621708	-0.002262	0.0341204		0.621479	-0.177122	0.0593081
0.622295	2.10997	0.603835		0.622343	-0.120353	0.00933196		0.622173	-0.301255	0.0396772		0.62254	-0.001558	0.0341714		0.622311	-0.175914	0.0593914
0.623127	2.1112	0.603881		0.623175	-0.12021	0.00933575		0.623005	-0.300422	0.0397305		0.623372	-0.002139	0.0341293		0.623143	-0.175388	0.0594276
0.623959	2.11206	0.603913		0.624007	-0.119432	0.00935641		0.623836	-0.298149	0.039876		0.624204	-0.002104	0.0341318		0.623975	-0.174868	0.0594635
0.624791	2.11339	0.603962		0.624839	-0.118668	0.0093767		0.624668	-0.298116	0.0398782		0.625037	-0.001867	0.034149		0.624807	-0.174544	0.0594858
0.625623	2.1146	0.604007		0.625671	-0.118946	0.00936932		0.6255	-0.297507	0.0399171		0.625869	-0.002231	0.0341226		0.625639	-0.174162	0.0595121
0.626455	2.11528	0.604032		0.626503	-0.119031	0.00936706		0.626332	-0.297508	0.0399171		0.626701	-0.001562	0.0341711		0.626471	-0.173084	0.0595864
0.627287	2.1171	0.6041		0.627335	-0.118739	0.00937482		0.627163	-0.297944	0.0398892		0.627533	-0.002183	0.0341261		0.627303	-0.171944	0.0596649
0.628119	2.11906	0.604172		0.628167	-0.118317	0.00938602		0.627995	-0.298493	0.039854		0.628366	-0.002288	0.0341185		0.628135	-0.17159	0.0596893
0.628951	2.12113	0.604249		0.628999	-0.118786	0.00937357		0.628827	-0.299182	0.0398099		0.629198	-0.002275	0.0341194		0.628967	-0.1716	0.0596886
0.629783	2.12308	0.604321		0.629831	-0.119973	0.00934205		0.629659	-0.300199	0.0397448		0.63003	-0.002363	0.034113		0.629799	-0.172107	0.0596537
0.630615	2.12508	0.604395		0.630664	-0.120762	0.0093211		0.630491	-0.300829	0.0397044		0.630863	-0.002805	0.034081		0.630631	-0.172834	0.0596036
0.631447	2.1272	0.604473		0.631495	-0.121306	0.00930665		0.631322	-0.300607	0.0397187		0.631695	-0.004223	0.0339782		0.631463	-0.173777	0.0595386
0.632279	2.12892	0.604537		0.632327	-0.122197	0.00928299		0.632154	-0.301616	0.0396541		0.632527	-0.004055	0.0339904		0.632295	-0.173668	0.0595461
0.633111	2.13133	0.604626		0.63316	-0.122371	0.00927837		0.632986	-0.301866	0.0396381		0.633359	-0.005689	0.033872		0.633127	-0.173443	0.0595616
0.633943	2.13297	0.604687		0.633992	-0.123349	0.0092524		0.633818	-0.302477	0.0395989		0.634192	-0.00576	0.0338668		0.633959	-0.17404	0.0595205
0.634775	2.13427	0.604735		0.634824	-0.124909	0.00921098		0.63465	-0.3038	0.0395142		0.635024	-0.00663	0.0338037		0.634791	-0.175102	0.0594473
0.635607	2.1349	0.604758		0.635656	-0.127615	0.00913912		0.635481	-0.304309	0.0394816		0.635856	-0.005141	0.0339117		0.635623	-0.17474	0.0594723
0.636439	2.13567	0.604787		0.636488	-0.129024	0.00910171		0.636313	-0.304127	0.0394933		0.636689	-0.004222	0.0339783		0.636455	-0.174897	0.0594615
0.637271	2.13698	0.604836		0.63732	-0.128919	0.00910449		0.637145	-0.304415	0.0394748		0.637521	-0.004689	0.0339444		0.637287	-0.173698	0.0595441
0.638102	2.13906	0.604913		0.638152	-0.129966	0.00907669		0.637977	-0.304367	0.0394779		0.638353	-0.005205	0.033907		0.638119	-0.173056	0.0595883
0.638934	2.14105	0.604986		0.638984	-0.130729	0.00905643		0.638808	-0.304149	0.0394919		0.639185	-0.00627	0.0338298		0.638951	-0.172112	0.0596534
0.639766	2.1424	0.605036		0.639816	-0.130963	0.00905022		0.63964	-0.305183	0.0394257		0.640018	-0.006794	0.0337919		0.639783	-0.171647	0.0596854
0.640598	2.14291	0.605055		0.640648	-0.129769	0.00908192		0.640472	-0.305999	0.0393734		0.64085	-0.006644	0.0338027		0.640615	-0.171298	0.0597094
0.64143	2.14318	0.605065		0.64148	-0.129069	0.00910051		0.641304	-0.305693	0.039393		0.641682	-0.006706	0.0337982		0.641447	-0.172061	0.0596569
0.642262	2.14434	0.605108		0.642312	-0.128288	0.00912125		0.642136	-0.307066	0.0393051		0.642514	-0.008439	0.0336726		0.642278	-0.172168	0.0596495
0.643094	2.14608	0.605173		0.643144	-0.127935	0.00913062		0.642967	-0.309262	0.0391645		0.643347	-0.010181	0.0335463		0.64311	-0.171819	0.0596735
0.643926	2.14793	0.605241		0.643976	-0.127653	0.00913811		0.643799	-0.309806	0.0391297		0.644179	-0.009981	0.0335608		0.643942	-0.170849	0.0597404
0.644758	2.14987	0.605313		0.644808	-0.128344	0.00911976		0.644631	-0.312422	0.0389622		0.645011	-0.010528	0.0335212		0.644774	-0.169562	0.0598291
0.64559	2.15167	0.60538		0.64564	-0.130217	0.00907003		0.645463	-0.311795	0.0390023		0.645844	-0.010545	0.03352		0.645606	-0.170135	0.0597896
0.646422	2.15355	0.605449		0.646472	-0.131278	0.00904185		0.646294	-0.313314	0.0389051		0.646676	-0.01013	0.03355		0.646438	-0.170623	0.059756
0.647254	2.15581	0.605533		0.647304	-0.131571	0.00903407		0.647126	-0.313927	0.0388658		0.647508	-0.0099	0.0335667		0.64727	-0.170268	0.0597804
0.648086	2.15717	0.605583		0.648136	-0.132523	0.00900879		0.647958	-0.314422	0.0388341		0.64834	-0.009583	0.0335897		0.648102	-0.169793	0.0598132
0.648918	2.15767	0.605602		0.648968	-0.132925	0.00899812		0.64879	-0.314976	0.0387986		0.649173	-0.009466	0.0335982		0.648934	-0.168501	0.0599022
0.64975	2.15838	0.605628		0.6498	-0.133829	0.00897411		0.649622	-0.315777	0.0387474		0.650005	-0.010237	0.0335423		0.649766	-0.167281	0.0599862
0.650582	2.15961	0.605674		0.650632	-0.134589	0.00895393		0.650453	-0.314762	0.0388123		0.650837	-0.010532	0.0335209		0.650598	-0.167104	0.0599984
0.651414	2.16153	0.605745		0.651464	-0.134242	0.00896315		0.651285	-0.313717	0.0388793		0.651669	-0.010668	0.033511		0.65143	-0.165918	0.0600802
0.652246	2.16297	0.605798		0.652296	-0.133925	0.00897156		0.652117	-0.31404	0.0388586		0.652502	-0.010059	0.0335552		0.652262	-0.16502	0.060142
0.653077	2.16471	0.605862		0.653128	-0.134046	0.00896835		0.652949	-0.314872	0.0388053		0.653334	-0.010154	0.0335483		0.653094	-0.165406	0.0601154
0.653909	2.16661	0.605933		0.65396	-0.135437	0.00893141		0.653781	-0.315475	0.0387667		0.654166	-0.009195	0.0336178		0.653926	-0.165746	0.060092
0.654741	2.16891	0.606018		0.654792	-0.136561	0.00890157		0.654612	-0.315894	0.0387399		0.654999	-0.008993	0.0336325		0.654758	-0.165765	0.0600907
0.655573	2.17116	0.606102		0.655624	-0.136831	0.0088944		0.655444	-0.316015	0.0387321		0.655831	-0.009714	0.0335802		0.65559	-0.165716	0.0600941
0.656405	2.17292	0.606167		0.656456	-0.135432	0.00893155		0.656276	-0.31571	0.0387516		0.656663	-0.009734	0.0335787		0.656422	-0.165116	0.0601354
0.657237	2.17496	0.606242		0.657288	-0.134687	0.00895133		0.657108	-0.315964	0.0387354		0.657495	-0.009835	0.0335714		0.657254	-0.164193	0.060199
0.658069	2.17712	0.606322		0.65812	-0.13595	0.00891779		0.657939	-0.315803	0.0387457		0.658328	-0.009017	0.0336307		0.658086	-0.164022	0.0602108
0.658901	2.17866	0.606379		0.658952	-0.13648	0.00890372		0.658771	-0.318201	0.0385921		0.65916	-0.008941	0.0336362		0.658918	-0.163074	0.0602761
0.659733	2.1797	0.606418		0.659784	-0.136662	0.00889889		0.659603	-0.317474	0.0386387		0.659992	-0.008573	0.0336629		0.65975	-0.163248	0.0602641
0.660565	2.1817	0.606492		0.660616	-0.137479	0.00887719		0.660435	-0.316462	0.0387035		0.660824	-0.008198	0.0336901		0.660582	-0.163758	0.060229
0.661397	2.18391	0.606573		0.661448	-0.139295	0.00882897		0.661267	-0.316494	0.0387014		0.661657	-0.009291	0.0336109		0.661414	-0.163478	0.0602483
0.662229	2.18555	0.606634		0.66228	-0.140903	0.00878627		0.662098	-0.316905	0.0386751		0.662489	-0.009593	0.033589		0.662246	-0.163163	0.06027
0.663061	2.18649	0.606669		0.663112	-0.14259	0.00874147		0.66293	-0.316643	0.0386919		0.663321	-0.00799	0.0337052		0.663078	-0.162818	0.0602938
0.663893	2.18736	0.606701		0.663944	-0.143174	0.00872597		0.663762	-0.31797	0.0386069		0.664154	-0.006911	0.0337834		0.66391	-0.163749	0.0602296
0.664725	2.18888	0.606758		0.664776	-0.144439	0.00869237		0.664594	-0.31892	0.0385461		0.664986	-0.007877	0.0337134		0.664742	-0.164306	0.0601912
0.665557	2.19027	0.606809		0.665608	-0.145901	0.00865355		0.665425	-0.319283	0.0385229		0.665818	-0.008778	0.033648		0.665574	-0.16564	0.0600993
0.666389	2.1919	0.606869		0.66644	-0.145485	0.0086646		0.666257	-0.320644	0.0384357		0.66665	-0.010297	0.0335379		0.666406	-0.164869	0.0601524
0.667221	2.19374	0.606938		0.667272	-0.144648	0.00868682		0.667089	-0.321619	0.0383733		0.667483	-0.011588	0.0334444		0.667238	-0.163672	0.0602349
0.668052	2.1947	0.606973		0.668104	-0.144426	0.00869272		0.667921	-0.322595	0.0383108		0.668315	-0.011702	0.0334361		0.668069	-0.165097	0.0601367
0.668884	2.19604	0.607023		0.668936	-0.145378	0.00866744		0.668753	-0.322628	0.0383087		0.669147	-0.01091	0.0334935		0.668901	-0.166216	0.0600596
0.669716	2.19771	0.607084		0.669768	-0.147506	0.00861093		0.669584	-0.32214	0.0383399		0.669979	-0.009803	0.0335737		0.669733	-0.168089	0.0599306
0.670548	2.19909	0.607136		0.6706	-0.148314	0.00858948		0.670416	-0.320917	0.0384182		0.670812	-0.008747	0.0336503		0.670565	-0.170241	0.0597823
0.67138	2.20052	0.607189		0.671432	-0.148963	0.00857224		0.671248	-0.322658	0.0383068		0.671644	-0.008851	0.0336428		0.671397	-0.169943	0.0598028
0.672212	2.20225	0.607253		0.672264	-0.149965	0.00854564		0.67208	-0.324738	0.0381736		0.672476	-0.008468	0.0336705		0.672229	-0.169646	0.0598233
0.673044	2.20357	0.607302		0.673096	-0.150592	0.00852899		0.672912	-0.325838	0.0381032		0.673308	-0.008483	0.0336694		0.673061	-0.169877	0.0598074
0.673876	2.20381	0.607311		0.673928	-0.150646	0.00852755		0.673743	-0.325878	0.0381006		0.674141	-0.008663	0.0336564		0.673893	-0.170845	0.0597407
0.674708	2.20447	0.607335		0.67476	-0.149844	0.00854885		0.674575	-0.326036	0.0380905		0.674973	-0.009332	0.0336079		0.674725	-0.170195	0.0597855
0.67554	2.2053	0.607366		0.675592	-0.149594	0.00855549		0.675407	-0.327036	0.0380265		0.675805	-0.009398	0.0336031		0.675557	-0.170901	0.0597368
0.676372	2.20617	0.607398		0.676424	-0.150557	0.00852992		0.676239	-0.328381	0.0379403		0.676638	-0.008921	0.0336377		0.676389	-0.171271	0.0597113
0.677204	2.20675	0.607419		0.677256	-0.152754	0.00847158		0.67707	-0.329476	0.0378702		0.67747	-0.009319	0.0336088		0.677221	-0.172877	0.0596006
0.678036	2.20756	0.607449		0.678088	-0.152998	0.0084651		0.677902	-0.330022	0.0378353		0.678302	-0.00967	0.0335834		0.678053	-0.175297	0.0594339
0.678868	2.20888	0.607498		0.67892	-0.152247	0.00848504		0.678734	-0.3299	0.0378431		0.679134	-0.009589	0.0335893		0.678885	-0.175536	0.0594174
0.6797	2.21041	0.607555		0.679752	-0.152007	0.00849141		0.679566	-0.328156	0.0379547		0.679967	-0.00894	0.0336363		0.679717	-0.175588	0.0594138
0.680532	2.21184	0.607608		0.680584	-0.152482	0.0084788		0.680398	-0.328439	0.0379366		0.680799	-0.009945	0.0335635		0.680549	-0.176536	0.0593485
0.681364	2.21257	0.607635		0.681416	-0.152444	0.00847981		0.681229	-0.32887	0.037909		0.681631	-0.009918	0.0335654		0.681381	-0.177148	0.0593063
0.682196	2.21364	0.607674		0.682248	-0.151596	0.00850233		0.682061	-0.329849	0.0378463		0.682464	-0.00931	0.0336095		0.682213	-0.178675	0.0592011
0.683028	2.21479	0.607717		0.68308	-0.15102	0.00851762		0.682893	-0.331514	0.0377397		0.683296	-0.009626	0.0335866		0.683045	-0.179079	0.0591733
0.683859	2.21648	0.60778		0.683912	-0.151162	0.00851385		0.683725	-0.331572	0.037736		0.684128	-0.009482	0.033597		0.683877	-0.179487	0.0591452
0.684691	2.21811	0.60784		0.684744	-0.151923	0.00849364		0.684556	-0.330753	0.0377885		0.68496	-0.010597	0.0335162		0.684709	-0.180109	0.0591023
0.685523	2.21932	0.607885		0.685576	-0.15172	0.00849903		0.685388	-0.32934	0.0378789		0.685793	-0.010403	0.0335303		0.685541	-0.179873	0.0591186
0.686355	2.22058	0.607931		0.686408	-0.151083	0.00851595		0.68622	-0.328551	0.0379295		0.686625	-0.008715	0.0336526		0.686373	-0.179704	0.0591302
0.687187	2.2208	0.60794		0.68724	-0.151962	0.00849261		0.687052	-0.328155	0.0379548		0.687457	-0.007626	0.0337315		0.687205	-0.180352	0.0590856
0.688019	2.22096	0.607945		0.688072	-0.153257	0.00845822		0.687884	-0.32797	0.0379667		0.688289	-0.008204	0.0336897		0.688037	-0.180825	0.059053
0.688851	2.22267	0.608009		0.688904	-0.154242	0.00843206		0.688715	-0.327974	0.0379664		0.689122	-0.009509	0.0335951		0.688869	-0.180431	0.0590801
0.689683	2.2243	0.608069		0.689736	-0.154436	0.00842691		0.689547	-0.3287	0.0379199		0.689954	-0.011494	0.0334512		0.689701	-0.179645	0.0591343
0.690515	2.22489	0.608091		0.690568	-0.154256	0.00843169		0.690379	-0.328376	0.0379407		0.690786	-0.012065	0.0334098		0.690533	-0.179205	0.0591646
0.691347	2.22592	0.608129		0.6914	-0.154197	0.00843326		0.691211	-0.330219	0.0378227		0.691619	-0.011816	0.0334278		0.691365	-0.178706	0.059199
0.692179	2.22734	0.608182		0.692232	-0.154615	0.00842216		0.692042	-0.330334	0.0378153		0.692451	-0.012922	0.0333477		0.692197	-0.179368	0.0591534
0.693011	2.22871	0.608233		0.693064	-0.154947	0.00841334		0.692874	-0.330113	0.0378294		0.693283	-0.013601	0.0332984		0.693029	-0.179842	0.0591207
0.693843	2.23016	0.608286		0.693896	-0.155041	0.00841085		0.693706	-0.327721	0.0379826		0.694115	-0.013762	0.0332868		0.69386	-0.180324	0.0590875
0.694675	2.23196	0.608353		0.694728	-0.154747	0.00841865		0.694538	-0.327225	0.0380144		0.694948	-0.01419	0.0332557		0.694692	-0.179502	0.0591441
0.695507	2.2332	0.608399		0.69556	-0.156109	0.00838249		0.69537	-0.328082	0.0379595		0.69578	-0.015018	0.0331957		0.695524	-0.180619	0.0590672
0.696339	2.23422	0.608437		0.696392	-0.157504	0.00834544		0.696201	-0.326594	0.0380548		0.696612	-0.015815	0.033138		0.696356	-0.18012	0.0591016
0.697171	2.23601	0.608503		0.697224	-0.157227	0.0083528		0.697033	-0.326581	0.0380556		0.697444	-0.016841	0.0330636		0.697188	-0.179435	0.0591488
0.698003	2.23762	0.608562		0.698056	-0.156169	0.00838089		0.697865	-0.326411	0.0380665		0.698277	-0.018232	0.0329627		0.69802	-0.178495	0.0592135
0.698834	2.23872	0.608603		0.698888	-0.15643	0.00837396		0.698697	-0.32649	0.0380614		0.699109	-0.019483	0.0328721		0.698852	-0.176688	0.059338
0.699666	2.24008	0.608654		0.69972	-0.156792	0.00836435		0.699529	-0.326996	0.038029		0.699941	-0.020422	0.032804		0.699684	-0.177244	0.0592997
0.700498	2.24093	0.608685		0.700552	-0.157123	0.00835556		0.70036	-0.326769	0.0380436		0.700774	-0.021061	0.0327577		0.700516	-0.178926	0.0591838
0.70133	2.24146	0.608705		0.701384	-0.157777	0.00833819		0.701192	-0.327238	0.0380135		0.701606	-0.021034	0.0327596		0.701348	-0.178872	0.0591876
0.702162	2.24257	0.608746		0.702216	-0.158201	0.00832694		0.702024	-0.328406	0.0379387		0.702438	-0.022138	0.0326796		0.70218	-0.178231	0.0592317
0.702994	2.24367	0.608787		0.703048	-0.158339	0.00832327		0.702856	-0.328258	0.0379482		0.70327	-0.022541	0.0326504		0.703012	-0.177582	0.0592764
0.703826	2.24479	0.608828		0.70388	-0.159076	0.0083037		0.703687	-0.326697	0.0380482		0.704103	-0.022766	0.0326341		0.703844	-0.178328	0.059225
0.704658	2.24654	0.608893		0.704712	-0.159221	0.00829985		0.704519	-0.326946	0.0380322		0.704935	-0.024217	0.0325289		0.704676	-0.178688	0.0592002
0.70549	2.24743	0.608926		0.705544	-0.160124	0.00827587		0.705351	-0.326716	0.0380469		0.705767	-0.024133	0.032535		0.705508	-0.178638	0.0592037
0.706322	2.24805	0.608949		0.706376	-0.16048	0.00826642		0.706183	-0.328081	0.0379595		0.706599	-0.02336	0.032591		0.70634	-0.179759	0.0591264
0.707154	2.24895	0.608982		0.707208	-0.160924	0.00825463		0.707015	-0.328342	0.0379428		0.707432	-0.024854	0.0324827		0.707172	-0.179806	0.0591232
0.707986	2.25109	0.609061		0.70804	-0.160693	0.00826076		0.707846	-0.328761	0.037916		0.708264	-0.025629	0.0324266		0.708004	-0.179798	0.0591237
0.708818	2.25252	0.609114		0.708872	-0.161074	0.00825065		0.708678	-0.328694	0.0379203		0.709096	-0.024929	0.0324773		0.708836	-0.180038	0.0591072
0.70965	2.25346	0.609149		0.709704	-0.161041	0.00825152		0.70951	-0.328429	0.0379373		0.709929	-0.024051	0.0325409		0.709668	-0.180214	0.0590951
0.710482	2.25446	0.609186		0.710536	-0.161381	0.00824249		0.710342	-0.32702	0.0380275		0.710761	-0.022782	0.0326329		0.7105	-0.181082	0.0590353
0.711314	2.25658	0.609265		0.711368	-0.161572	0.00823742		0.711173	-0.328066	0.0379605		0.711593	-0.02261	0.0326454		0.711332	-0.181993	0.0589725
0.712146	2.25851	0.609336		0.7122	-0.162321	0.00821753		0.712005	-0.328093	0.0379588		0.712425	-0.023815	0.0325581		0.712164	-0.182189	0.058959
0.712978	2.25903	0.609355		0.713032	-0.162672	0.00820821		0.712837	-0.326675	0.0380496		0.713258	-0.02349	0.0325816		0.712996	-0.182512	0.0589367
0.713809	2.25953	0.609374		0.713865	-0.162531	0.00821196		0.713669	-0.327847	0.0379745		0.71409	-0.022499	0.0326534		0.713828	-0.183331	0.0588803
0.714641	2.26065	0.609415		0.714696	-0.16321	0.00819393		0.714501	-0.33036	0.0378136		0.714922	-0.022277	0.0326695		0.71466	-0.184002	0.0588341
0.715473	2.26217	0.609472		0.715528	-0.163793	0.00817844		0.715332	-0.32929	0.0378821		0.715754	-0.022198	0.0326753		0.715492	-0.184582	0.0587941
0.716305	2.26429	0.60955		0.716361	-0.164051	0.00817159		0.716164	-0.328975	0.0379023		0.716587	-0.022126	0.0326805		0.716324	-0.184654	0.0587891
0.717137	2.26549	0.609595		0.717193	-0.164449	0.00816103		0.716996	-0.329832	0.0378474		0.717419	-0.022842	0.0326286		0.717156	-0.184069	0.0588294
0.717969	2.26554	0.609597		0.718025	-0.166249	0.00811323		0.717828	-0.327316	0.0380085		0.718251	-0.022801	0.0326316		0.717988	-0.184477	0.0588013
0.718801	2.26668	0.609639		0.718857	-0.167992	0.00806694		0.71866	-0.328192	0.0379524		0.719083	-0.021494	0.0327263		0.718819	-0.185687	0.058718
0.719633	2.26747	0.609668		0.719689	-0.169306	0.00803205		0.719491	-0.328939	0.0379046		0.719916	-0.020523	0.0327967		0.719651	-0.187759	0.0585752
0.720465	2.2678	0.60968		0.720521	-0.169765	0.00801986		0.720323	-0.329241	0.0378853		0.720748	-0.021133	0.0327525		0.720483	-0.187965	0.058561
0.721297	2.2682	0.609695		0.721353	-0.169318	0.00803173		0.721155	-0.330101	0.0378302		0.72158	-0.022607	0.0326456		0.721315	-0.186573	0.0586569
0.722129	2.26927	0.609735		0.722185	-0.169624	0.00802361		0.721987	-0.330061	0.0378328		0.722413	-0.022972	0.0326192		0.722147	-0.187151	0.0586171
0.722961	2.271	0.609799		0.723017	-0.170257	0.0080068		0.722818	-0.328492	0.0379332		0.723245	-0.023225	0.0326008		0.722979	-0.187152	0.058617
0.723793	2.27322	0.609881		0.723849	-0.1701	0.00801097		0.72365	-0.329287	0.0378823		0.724077	-0.023712	0.0325655		0.723811	-0.187334	0.0586045
0.724625	2.2751	0.609951		0.724681	-0.170456	0.00800151		0.724482	-0.328948	0.037904		0.724909	-0.024122	0.0325358		0.724643	-0.185596	0.0587242
0.725457	2.27611	0.609988		0.725513	-0.171183	0.00798221		0.725314	-0.328704	0.0379197		0.725742	-0.024488	0.0325093		0.725475	-0.185381	0.058739
0.726289	2.27686	0.610016		0.726345	-0.172136	0.0079569		0.726146	-0.32865	0.0379231		0.726574	-0.025853	0.0324103		0.726307	-0.185288	0.0587454
0.727121	2.27829	0.610069		0.727177	-0.172434	0.00794899		0.726977	-0.328743	0.0379172		0.727406	-0.027019	0.0323258		0.727139	-0.185009	0.0587647
0.727953	2.279	0.610095		0.728009	-0.171979	0.00796107		0.727809	-0.330137	0.0378279		0.728239	-0.026976	0.0323289		0.727971	-0.185043	0.0587623
0.728785	2.28019	0.610139		0.728841	-0.17167	0.00796928		0.728641	-0.33133	0.0377515		0.729071	-0.027856	0.0322651		0.728803	-0.184718	0.0587847
0.729616	2.28152	0.610188		0.729673	-0.171451	0.00797509		0.729473	-0.331128	0.0377645		0.729903	-0.02889	0.0321902		0.729635	-0.185285	0.0587457
0.730448	2.28268	0.610231		0.730505	-0.17141	0.00797618		0.730304	-0.330408	0.0378106		0.730735	-0.028874	0.0321913		0.730467	-0.185285	0.0587457
0.73128	2.2832	0.61025		0.731337	-0.171492	0.007974		0.731136	-0.331284	0.0377545		0.731568	-0.028879	0.032191		0.731299	-0.185638	0.0587213
0.732112	2.28272	0.610232		0.732169	-0.170922	0.00798914		0.731968	-0.331109	0.0377657		0.7324	-0.029673	0.0321334		0.732131	-0.185601	0.0587239
0.732944	2.28321	0.610251		0.733001	-0.170375	0.00800367		0.7328	-0.331887	0.0377159		0.733232	-0.030332	0.0320857		0.732963	-0.186151	0.058686
0.733776	2.28418	0.610287		0.733833	-0.170273	0.00800637		0.733632	-0.332518	0.0376755		0.734064	-0.030394	0.0320812		0.733795	-0.185865	0.0587057
0.734608	2.28608	0.610357		0.734665	-0.170358	0.00800412		0.734463	-0.331405	0.0377467		0.734897	-0.031013	0.0320363		0.734627	-0.186497	0.0586621
0.73544	2.28742	0.610407		0.735497	-0.171145	0.00798322		0.735295	-0.330905	0.0377787		0.735729	-0.03157	0.0319959		0.735459	-0.185431	0.0587356
0.736272	2.28795	0.610426		0.736329	-0.171035	0.00798614		0.736127	-0.331457	0.0377434		0.736561	-0.032281	0.0319444		0.736291	-0.185607	0.0587235
0.737104	2.28837	0.610442		0.737161	-0.169506	0.00802674		0.736959	-0.33173	0.0377259		0.737393	-0.033051	0.0318886		0.737123	-0.185087	0.0587593
0.737936	2.28932	0.610477		0.737993	-0.168554	0.00805202		0.73779	-0.331603	0.037734		0.738226	-0.032667	0.0319164		0.737955	-0.186011	0.0586956
0.738768	2.29034	0.610515		0.738825	-0.167974	0.00806742		0.738622	-0.333033	0.0376425		0.739058	-0.033206	0.0318773		0.738787	-0.185709	0.0587164
0.7396	2.29055	0.610523		0.739657	-0.166332	0.00811102		0.739454	-0.332251	0.0376926		0.73989	-0.033295	0.0318709		0.739619	-0.184904	0.0587719
0.740432	2.29194	0.610574		0.740489	-0.164853	0.0081503		0.740286	-0.330993	0.0377731		0.740723	-0.034014	0.0318188		0.740451	-0.184362	0.0588093
0.741264	2.29353	0.610633		0.741321	-0.164631	0.00815619		0.741118	-0.330354	0.037814		0.741555	-0.033332	0.0318682		0.741283	-0.184188	0.0588212
0.742096	2.29491	0.610684		0.742153	-0.164776	0.00815234		0.741949	-0.329888	0.0378439		0.742387	-0.032563	0.0319239		0.742115	-0.185016	0.0587642
0.742928	2.29544	0.610704		0.742985	-0.164684	0.00815478		0.742781	-0.329653	0.0378589		0.743219	-0.033481	0.0318574		0.742947	-0.184863	0.0587747
0.74376	2.29518	0.610694		0.743817	-0.164818	0.00815123		0.743613	-0.331187	0.0377607		0.744052	-0.032758	0.0319098		0.743778	-0.185105	0.0587581
0.744591	2.29582	0.610718		0.744649	-0.166004	0.00811973		0.744445	-0.33065	0.0377951		0.744884	-0.032792	0.0319073		0.74461	-0.184804	0.0587788
0.745423	2.29643	0.61074		0.745481	-0.166303	0.00811179		0.745277	-0.332256	0.0376922		0.745716	-0.033033	0.0318899		0.745442	-0.185106	0.058758
0.746255	2.29716	0.610767		0.746313	-0.166641	0.00810282		0.746108	-0.333122	0.0376368		0.746548	-0.033088	0.0318859		0.746274	-0.185125	0.0587567
0.747087	2.2996	0.610858		0.747145	-0.164846	0.00815048		0.74694	-0.331936	0.0377127		0.747381	-0.032029	0.0319626		0.747106	-0.184961	0.058768
0.747919	2.30055	0.610893		0.747977	-0.164107	0.00817011		0.747772	-0.332402	0.0376829		0.748213	-0.030976	0.032039		0.747938	-0.184382	0.0588079
0.748751	2.30326	0.610993		0.748809	-0.164681	0.00815486		0.748604	-0.331057	0.037769		0.749045	-0.030754	0.0320551		0.74877	-0.184147	0.0588241
0.749583	2.30433	0.611033		0.749641	-0.164123	0.00816968		0.749435	-0.329859	0.0378457		0.749878	-0.030201	0.0320952		0.749602	-0.183515	0.0588676
0.750415	2.30483	0.611051		0.750473	-0.164042	0.00817183		0.750267	-0.32975	0.0378527		0.75071	-0.029585	0.0321398		0.750434	-0.182956	0.0589061
0.751247	2.30502	0.611058		0.751305	-0.164354	0.00816355		0.751099	-0.330389	0.0378118		0.751542	-0.029266	0.0321629		0.751266	-0.183041	0.0589003
0.752079	2.30646	0.611112		0.752137	-0.164339	0.00816395		0.751931	-0.331002	0.0377725		0.752374	-0.029763	0.0321269		0.752098	-0.183635	0.0588593
0.752911	2.30952	0.611225		0.752969	-0.164478	0.00816026		0.752763	-0.3314	0.037747		0.753207	-0.029772	0.0321262		0.75293	-0.183383	0.0588767
0.753743	2.31069	0.611268		0.753801	-0.164018	0.00817247		0.753594	-0.330434	0.0378089		0.754039	-0.028359	0.0322287		0.753762	-0.183902	0.058841
0.754575	2.31274	0.611344		0.754633	-0.163896	0.00817571		0.754426	-0.331723	0.0377264		0.754871	-0.028118	0.0322461		0.754594	-0.184275	0.0588152
0.755407	2.31271	0.611343		0.755465	-0.163929	0.00817483		0.755258	-0.33188	0.0377163		0.755704	-0.028707	0.0322034		0.755426	-0.183327	0.0588806
0.756239	2.31287	0.611349		0.756297	-0.162239	0.00821971		0.75609	-0.332451	0.0376797		0.756536	-0.028932	0.0321871		0.756258	-0.183703	0.0588547
0.757071	2.31393	0.611388		0.757129	-0.161659	0.00823511		0.756921	-0.333182	0.0376329		0.757368	-0.029103	0.0321747		0.75709	-0.18347	0.0588707
0.757903	2.31509	0.611431		0.757961	-0.162482	0.00821326		0.757753	-0.332341	0.0376868		0.7582	-0.028254	0.0322363		0.757922	-0.184517	0.0587986
0.758735	2.31595	0.611463		0.758793	-0.162823	0.0082042		0.758585	-0.331975	0.0377102		0.759033	-0.027869	0.0322642		0.758754	-0.185229	0.0587495
0.759566	2.31759	0.611524		0.759625	-0.161234	0.0082464		0.759417	-0.331553	0.0377372		0.759865	-0.027567	0.0322861		0.759586	-0.186571	0.058657
0.760398	2.32038	0.611627		0.760457	-0.160065	0.00827744		0.760249	-0.330906	0.0377787		0.760697	-0.028213	0.0322393		0.760418	-0.186727	0.0586463
0.76123	2.32156	0.611671		0.761289	-0.16146	0.0082404		0.76108	-0.331873	0.0377168		0.761529	-0.029287	0.0321614		0.76125	-0.187337	0.0586043
0.762062	2.32248	0.611705		0.762121	-0.162255	0.00821928		0.761912	-0.33266	0.0376664		0.762362	-0.030107	0.032102		0.762082	-0.188026	0.0585568
0.762894	2.32403	0.611763		0.762953	-0.162376	0.00821607		0.762744	-0.333456	0.0376154		0.763194	-0.030322	0.0320864		0.762914	-0.187658	0.0585821
0.763726	2.32597	0.611834		0.763785	-0.162233	0.00821987		0.763576	-0.333759	0.037596		0.764026	-0.030249	0.0320917		0.763746	-0.187167	0.058616
0.764558	2.32811	0.611914		0.764617	-0.161777	0.00823198		0.764408	-0.333243	0.037629		0.764858	-0.031034	0.0320348		0.764578	-0.187535	0.0585906
0.76539	2.32874	0.611937		0.765449	-0.161868	0.00822956		0.765239	-0.33365	0.037603		0.765691	-0.031328	0.0320135		0.76541	-0.189168	0.0584781
0.766222	2.32948	0.611964		0.766281	-0.160813	0.00825758		0.766071	-0.333658	0.0376025		0.766523	-0.030905	0.0320441		0.766242	-0.190726	0.0583707
0.767054	2.33012	0.611988		0.767113	-0.158949	0.00830707		0.766903	-0.334397	0.0375551		0.767355	-0.030961	0.0320401		0.767074	-0.190899	0.0583588
0.767886	2.32991	0.61198		0.767945	-0.159405	0.00829496		0.767735	-0.336352	0.03743		0.768188	-0.032112	0.0319566		0.767906	-0.191324	0.0583295
0.768718	2.33106	0.612023		0.768777	-0.160477	0.0082665		0.768566	-0.335384	0.037492		0.76902	-0.033788	0.0318351		0.768737	-0.191649	0.0583071
0.76955	2.33131	0.612032		0.769609	-0.160975	0.00825327		0.769398	-0.335158	0.0375064		0.769852	-0.03389	0.0318277		0.769569	-0.194197	0.0581316
0.770382	2.33233	0.61207		0.770441	-0.161465	0.00824026		0.77023	-0.336081	0.0374473		0.770684	-0.033647	0.0318454		0.770401	-0.194424	0.0581159
0.771214	2.33316	0.6121		0.771273	-0.16174	0.00823296		0.771062	-0.337132	0.03738		0.771517	-0.034755	0.031765		0.771233	-0.194615	0.0581028
0.772046	2.33468	0.612157		0.772105	-0.160921	0.00825471		0.771894	-0.337956	0.0373273		0.772349	-0.035995	0.0316752		0.772065	-0.196271	0.0579886
0.772878	2.33605	0.612207		0.772937	-0.160059	0.0082776		0.772725	-0.337918	0.0373297		0.773181	-0.036432	0.0316435		0.772897	-0.196306	0.0579862
0.77371	2.33671	0.612232		0.773769	-0.159743	0.00828599		0.773557	-0.338045	0.0373216		0.774014	-0.03698	0.0316038		0.773729	-0.197369	0.057913
0.774542	2.33679	0.612235		0.774601	-0.159956	0.00828033		0.774389	-0.339071	0.0372559		0.774846	-0.03789	0.0315378		0.774561	-0.197474	0.0579058
0.775373	2.33704	0.612244		0.775433	-0.160121	0.00827595		0.775221	-0.339361	0.0372373		0.775678	-0.038713	0.0314781		0.775393	-0.196586	0.0579669
0.776205	2.33839	0.612294		0.776265	-0.160272	0.00827194		0.776052	-0.33927	0.0372431		0.77651	-0.039128	0.0314481		0.776225	-0.19686	0.0579481
0.777037	2.33851	0.612298		0.777097	-0.16036	0.00826961		0.776884	-0.339011	0.0372597		0.777343	-0.039297	0.0314358		0.777057	-0.196805	0.0579518
0.777869	2.34012	0.612358		0.777929	-0.159456	0.00829361		0.777716	-0.338279	0.0373066		0.778175	-0.039721	0.0314051		0.777889	-0.19648	0.0579742
0.778701	2.34211	0.612432		0.778761	-0.158494	0.00831916		0.778548	-0.339789	0.0372099		0.779007	-0.040838	0.0313241		0.778721	-0.195726	0.0580262
0.779533	2.34382	0.612495		0.779593	-0.159092	0.00830328		0.77938	-0.339601	0.0372219		0.779839	-0.040099	0.0313777		0.779553	-0.195674	0.0580298
0.780365	2.34337	0.612479		0.780425	-0.159877	0.00828243		0.780211	-0.34073	0.0371497		0.780672	-0.039677	0.0314083		0.780385	-0.194529	0.0581087
0.781197	2.34311	0.612469		0.781257	-0.160813	0.00825758		0.781043	-0.341889	0.0370754		0.781504	-0.04	0.0313848		0.781217	-0.195322	0.058054
0.782029	2.34379	0.612494		0.782089	-0.160198	0.00827391		0.781875	-0.342296	0.0370494		0.782336	-0.039035	0.0314548		0.782049	-0.194892	0.0580837
0.782861	2.34517	0.612545		0.782921	-0.159013	0.00830537		0.782707	-0.34335	0.0369819		0.783168	-0.03742	0.0315719		0.782881	-0.195863	0.0580168
0.783693	2.3457	0.612565		0.783753	-0.15806	0.00833068		0.783538	-0.343246	0.0369886		0.784001	-0.037483	0.0315673		0.783713	-0.197194	0.057925
0.784525	2.34529	0.612549		0.784585	-0.157309	0.00835062		0.78437	-0.343396	0.036979		0.784833	-0.037881	0.0315384		0.784545	-0.19816	0.0578585
0.785357	2.34546	0.612556		0.785417	-0.15681	0.00836387		0.785202	-0.343813	0.0369523		0.785665	-0.037576	0.0315606		0.785377	-0.197518	0.0579027
0.786189	2.34612	0.61258		0.786249	-0.155205	0.00840649		0.786034	-0.34398	0.0369416		0.786498	-0.037612	0.0315579		0.786209	-0.196525	0.0579711
0.787021	2.3464	0.612591		0.787081	-0.153808	0.00844359		0.786866	-0.342863	0.0370131		0.78733	-0.037238	0.0315851		0.787041	-0.195524	0.0580401
0.787853	2.34744	0.612629		0.787913	-0.154312	0.0084302		0.787697	-0.341632	0.0370919		0.788162	-0.037247	0.0315844		0.787873	-0.195697	0.0580282
0.788685	2.34786	0.612645		0.788745	-0.153505	0.00845163		0.788529	-0.34134	0.0371106		0.788994	-0.037784	0.0315455		0.788705	-0.197217	0.0579235
0.789517	2.34853	0.61267		0.789577	-0.151444	0.00850636		0.789361	-0.341548	0.0370973		0.789827	-0.037181	0.0315892		0.789537	-0.198796	0.0578147
0.790349	2.3489	0.612683		0.790409	-0.150275	0.0085374		0.790193	-0.341966	0.0370705		0.790659	-0.037025	0.0316005		0.790369	-0.19781	0.0578826
0.79118	2.34962	0.61271		0.791241	-0.148775	0.00857724		0.791025	-0.342026	0.0370667		0.791491	-0.037137	0.0315924		0.791201	-0.199287	0.0577808
0.792012	2.35162	0.612784		0.792073	-0.146813	0.00862933		0.791856	-0.342321	0.0370478		0.792323	-0.036562	0.0316341		0.792033	-0.200821	0.0576751
0.792844	2.35284	0.612829		0.792905	-0.145481	0.0086647		0.792688	-0.34163	0.037092		0.793156	-0.036965	0.0316048		0.792865	-0.199358	0.0577759
0.793676	2.35293	0.612832		0.793737	-0.143503	0.00871723		0.79352	-0.341604	0.0370937		0.793988	-0.036781	0.0316182		0.793697	-0.198991	0.0578012
0.794508	2.35346	0.612852		0.794569	-0.14146	0.00877148		0.794352	-0.342149	0.0370588		0.79482	-0.036613	0.0316304		0.794528	-0.199242	0.0577839
0.79534	2.35455	0.612892		0.795401	-0.139116	0.00883372		0.795183	-0.341664	0.0370899		0.795653	-0.037576	0.0315606		0.79536	-0.198129	0.0578606
0.796172	2.35558	0.612931		0.796233	-0.136563	0.00890151		0.796015	-0.339448	0.0372317		0.796485	-0.036824	0.0316151		0.796192	-0.199561	0.0577619
0.797004	2.35639	0.612961		0.797065	-0.135073	0.00894108		0.796847	-0.339474	0.0372301		0.797317	-0.036653	0.0316275		0.797024	-0.200063	0.0577274
0.797836	2.35726	0.612993		0.797897	-0.135123	0.00893975		0.797679	-0.33913	0.0372521		0.798149	-0.036548	0.0316351		0.797856	-0.199984	0.0577328
0.798668	2.3577	0.613009		0.798729	-0.134214	0.00896389		0.798511	-0.339572	0.0372238		0.798982	-0.035488	0.0317119		0.798688	-0.200844	0.0576735
0.7995	2.35742	0.612999		0.799562	-0.133236	0.00898986		0.799342	-0.339848	0.0372061		0.799814	-0.034551	0.0317798		0.79952	-0.200165	0.0577203
0.800332	2.35767	0.613008		0.800394	-0.130736	0.00905625		0.800174	-0.340914	0.0371379		0.800646	-0.034394	0.0317912		0.800352	-0.200266	0.0577134
0.801164	2.35876	0.613049		0.801226	-0.129534	0.00908816		0.801006	-0.340912	0.037138		0.801479	-0.034697	0.0317692		0.801184	-0.201006	0.0576624
0.801996	2.36025	0.613104		0.802058	-0.128045	0.0091277		0.801838	-0.340581	0.0371592		0.802311	-0.034392	0.0317914		0.802016	-0.200901	0.0576696
0.802828	2.36098	0.613131		0.80289	-0.127431	0.00914401		0.802669	-0.340102	0.0371899		0.803143	-0.03473	0.0317669		0.802848	-0.199591	0.0577599
0.80366	2.36236	0.613182		0.803722	-0.126179	0.00917725		0.803501	-0.339729	0.0372137		0.803975	-0.036445	0.0316425		0.80368	-0.199354	0.0577762
0.804492	2.36388	0.613238		0.804554	-0.125029	0.00920779		0.804333	-0.34105	0.0371292		0.804808	-0.037345	0.0315773		0.804512	-0.199546	0.057763
0.805324	2.36584	0.613311		0.805386	-0.123258	0.00925482		0.805165	-0.341143	0.0371232		0.80564	-0.037234	0.0315853		0.805344	-0.200192	0.0577185
0.806156	2.36834	0.613403		0.806218	-0.121287	0.00930716		0.805997	-0.341292	0.0371137		0.806472	-0.036967	0.0316047		0.806176	-0.201414	0.0576343
0.806987	2.36948	0.613445		0.80705	-0.120332	0.00933252		0.806828	-0.341489	0.0371011		0.807304	-0.036852	0.031613		0.807008	-0.201409	0.0576346
0.807819	2.3704	0.613479		0.807882	-0.12009	0.00933894		0.80766	-0.342225	0.0370539		0.808137	-0.037143	0.0315919		0.80784	-0.201876	0.0576024
0.808651	2.37065	0.613489		0.808714	-0.119116	0.00936481		0.808492	-0.342342	0.0370464		0.808969	-0.037523	0.0315644		0.808672	-0.201964	0.0575964
0.809483	2.37158	0.613523		0.809546	-0.11686	0.00942471		0.809324	-0.342861	0.0370132		0.809801	-0.036596	0.0316316		0.809504	-0.2	0.0577317
0.810315	2.37245	0.613555		0.810378	-0.11583	0.00945206		0.810156	-0.343079	0.0369993		0.810633	-0.036019	0.0316734		0.810336	-0.199202	0.0577867
0.811147	2.37383	0.613607		0.81121	-0.114381	0.00949054		0.810987	-0.343601	0.0369658		0.811466	-0.036304	0.0316528		0.811168	-0.19899	0.0578013
0.811979	2.37346	0.613593		0.812042	-0.115015	0.0094737		0.811819	-0.341782	0.0370823		0.812298	-0.036344	0.0316499		0.812	-0.198877	0.0578091
0.812811	2.37415	0.613619		0.812874	-0.115954	0.00944877		0.812651	-0.339815	0.0372082		0.81313	-0.036128	0.0316655		0.812832	-0.198125	0.0578609
0.813643	2.37563	0.613673		0.813706	-0.116818	0.00942583		0.813483	-0.340215	0.0371826		0.813963	-0.035618	0.0317025		0.813664	-0.199557	0.0577622
0.814475	2.37571	0.613676		0.814538	-0.11753	0.00940692		0.814314	-0.340038	0.037194		0.814795	-0.035938	0.0316793		0.814496	-0.200185	0.0577189
0.815307	2.37482	0.613643		0.81537	-0.117343	0.00941189		0.815146	-0.340167	0.0371857		0.815627	-0.035959	0.0316778		0.815328	-0.199607	0.0577588
0.816139	2.37614	0.613692		0.816202	-0.117909	0.00939686		0.815978	-0.340817	0.0371441		0.816459	-0.035106	0.0317396		0.81616	-0.201228	0.0576471
0.816971	2.37639	0.613702		0.817034	-0.118812	0.00937288		0.81681	-0.342571	0.0370318		0.817292	-0.034858	0.0317576		0.816992	-0.20084	0.0576738
0.817803	2.37653	0.613707		0.817866	-0.118339	0.00938544		0.817642	-0.34208	0.0370632		0.818124	-0.034706	0.0317686		0.817824	-0.20082	0.0576752
0.818635	2.37706	0.613726		0.818698	-0.117571	0.00940583		0.818473	-0.343586	0.0369668		0.818956	-0.034973	0.0317492		0.818655	-0.201228	0.0576471
0.819467	2.37703	0.613725		0.81953	-0.117366	0.00941127		0.819305	-0.34416	0.03693		0.819789	-0.035877	0.0316837		0.819487	-0.200568	0.0576926
0.820299	2.3771	0.613728		0.820362	-0.116408	0.00943671		0.820137	-0.343823	0.0369516		0.820621	-0.036295	0.0316534		0.820319	-0.201842	0.0576048
0.821131	2.37661	0.613709		0.821194	-0.116177	0.00944285		0.820969	-0.342633	0.0370278		0.821453	-0.03665	0.0316277		0.821151	-0.202612	0.0575517
0.821962	2.37819	0.613768		0.822026	-0.115045	0.00947291		0.8218	-0.342954	0.0370073		0.822285	-0.037086	0.0315961		0.821983	-0.203218	0.05751
0.822794	2.37824	0.61377		0.822858	-0.114737	0.00948109		0.822632	-0.343668	0.0369615		0.823118	-0.037328	0.0315785		0.822815	-0.203636	0.0574811
0.823626	2.37918	0.613805		0.82369	-0.114321	0.00949213		0.823464	-0.344555	0.0369047		0.82395	-0.036947	0.0316062		0.823647	-0.204555	0.0574178
0.824458	2.37809	0.613764		0.824522	-0.114234	0.00949444		0.824296	-0.344229	0.0369256		0.824782	-0.0366	0.0316313		0.824479	-0.205028	0.0573852
0.82529	2.37742	0.61374		0.825354	-0.1141	0.009498		0.825128	-0.34346	0.0369749		0.825614	-0.036126	0.0316657		0.825311	-0.204229	0.0574403
0.826122	2.37722	0.613732		0.826186	-0.114647	0.00948348		0.825959	-0.342764	0.0370194		0.826447	-0.035963	0.0316775		0.826143	-0.204297	0.0574356
0.826954	2.37637	0.613701		0.827018	-0.113663	0.00950961		0.826791	-0.342574	0.0370316		0.827279	-0.036442	0.0316428		0.826975	-0.203943	0.05746
0.827786	2.37553	0.61367		0.82785	-0.113825	0.0095053		0.827623	-0.342435	0.0370405		0.828111	-0.03659	0.031632		0.827807	-0.204552	0.057418
0.828618	2.37704	0.613725		0.828682	-0.113684	0.00950905		0.828455	-0.341556	0.0370968		0.828943	-0.036616	0.0316301		0.828639	-0.204871	0.057396
0.82945	2.37883	0.613792		0.829514	-0.112966	0.00952811		0.829286	-0.34258	0.0370312		0.829776	-0.036448	0.0316423		0.829471	-0.205313	0.0573656
0.830282	2.38044	0.613852		0.830346	-0.113774	0.00950666		0.830118	-0.342572	0.0370317		0.830608	-0.03751	0.0315653		0.830303	-0.206306	0.0572972
0.831114	2.3809	0.613868		0.831178	-0.112898	0.00952992		0.83095	-0.343376	0.0369802		0.83144	-0.037832	0.031542		0.831135	-0.206963	0.0572519
0.831946	2.3813	0.613883		0.83201	-0.112027	0.00955305		0.831782	-0.343361	0.0369812		0.832273	-0.03779	0.031545		0.831967	-0.20645	0.0572872
0.832778	2.38322	0.613954		0.832842	-0.1095	0.00962015		0.832614	-0.345137	0.0368675		0.833105	-0.038805	0.0314715		0.832799	-0.205132	0.0573781
0.83361	2.38239	0.613924		0.833674	-0.107652	0.00966922		0.833445	-0.345841	0.0368224		0.833937	-0.039624	0.0314121		0.833631	-0.204447	0.0574253
0.834442	2.38197	0.613908		0.834506	-0.105767	0.00971928		0.834277	-0.345254	0.03686		0.834769	-0.039887	0.031393		0.834463	-0.20215	0.0575835
0.835274	2.38269	0.613935		0.835338	-0.105278	0.00973226		0.835109	-0.345384	0.0368517		0.835602	-0.038882	0.0314659		0.835295	-0.200854	0.0576728
0.836106	2.38413	0.613988		0.83617	-0.104109	0.0097633		0.835941	-0.345699	0.0368315		0.836434	-0.038684	0.0314802		0.836127	-0.201243	0.057646
0.836937	2.38501	0.61402		0.837002	-0.10342	0.0097816		0.836773	-0.34552	0.036843		0.837266	-0.038913	0.0314636		0.836959	-0.200896	0.05767
0.837769	2.38589	0.614053		0.837834	-0.101926	0.00982127		0.837604	-0.345092	0.0368704		0.838098	-0.038906	0.0314641		0.837791	-0.20158	0.0576228
0.838601	2.38555	0.61404		0.838666	-0.100858	0.00984963		0.838436	-0.346738	0.036765		0.838931	-0.039403	0.0314281		0.838623	-0.202791	0.0575394
0.839433	2.38553	0.61404		0.839498	-0.099101	0.00989629		0.839268	-0.345445	0.0368478		0.839763	-0.039135	0.0314476		0.839455	-0.203125	0.0575164
0.840265	2.38573	0.614047		0.84033	-0.098311	0.00991726		0.8401	-0.345265	0.0368593		0.840595	-0.039007	0.0314568		0.840287	-0.203826	0.0574681
0.841097	2.38702	0.614095		0.841162	-0.097573	0.00993686		0.840931	-0.345401	0.0368506		0.841428	-0.039041	0.0314544		0.841119	-0.202178	0.0575816
0.841929	2.38919	0.614175		0.841994	-0.096316	0.00997024		0.841763	-0.346742	0.0367647		0.84226	-0.039452	0.0314246		0.841951	-0.201679	0.057616
0.842761	2.38962	0.614191		0.842826	-0.096267	0.00997154		0.842595	-0.346797	0.0367612		0.843092	-0.040074	0.0313795		0.842783	-0.200811	0.0576758
0.843593	2.39056	0.614226		0.843658	-0.094697	0.0100132		0.843427	-0.347035	0.036746		0.843924	-0.040302	0.031363		0.843615	-0.199863	0.0577411
0.844425	2.39183	0.614273		0.84449	-0.091995	0.010085		0.844259	-0.346381	0.0367878		0.844757	-0.040319	0.0313617		0.844446	-0.199542	0.0577633
0.845257	2.39226	0.614289		0.845322	-0.089696	0.010146		0.84509	-0.34643	0.0367847		0.845589	-0.040867	0.031322		0.845278	-0.198641	0.0578253
0.846089	2.39299	0.614316		0.846154	-0.088163	0.0101867		0.845922	-0.346632	0.0367718		0.846421	-0.041618	0.0312676		0.84611	-0.198763	0.0578169
0.846921	2.39396	0.614352		0.846986	-0.086954	0.0102188		0.846754	-0.347412	0.0367218		0.847254	-0.041412	0.0312825		0.846942	-0.199647	0.057756
0.847753	2.39499	0.61439		0.847818	-0.086762	0.0102239		0.847586	-0.348203	0.0366712		0.848086	-0.041454	0.0312795		0.847774	-0.200118	0.0577236
0.848585	2.39594	0.614425		0.84865	-0.084217	0.0102915		0.848417	-0.349409	0.036594		0.848918	-0.042448	0.0312074		0.848606	-0.200623	0.0576888
0.849417	2.39601	0.614428		0.849482	-0.082582	0.0103349		0.849249	-0.350572	0.0365195		0.84975	-0.042671	0.0311912		0.849438	-0.20089	0.0576704
0.850249	2.3961	0.614431		0.850314	-0.082199	0.0103451		0.850081	-0.35083	0.036503		0.850583	-0.042757	0.031185		0.85027	-0.199993	0.0577322
0.851081	2.39613	0.614432		0.851146	-0.080852	0.0103809		0.850913	-0.350635	0.0365155		0.851415	-0.04175	0.031258		0.851102	-0.200443	0.0577012
0.851912	2.39658	0.614449		0.851978	-0.080082	0.0104013		0.851745	-0.35069	0.0365119		0.852247	-0.040762	0.0313296		0.851934	-0.199833	0.0577432
0.852744	2.39671	0.614454		0.85281	-0.079705	0.0104113		0.852576	-0.350512	0.0365233		0.853079	-0.040376	0.0313576		0.852766	-0.201745	0.0576115
0.853576	2.39651	0.614447		0.853642	-0.079993	0.0104037		0.853408	-0.350376	0.036532		0.853912	-0.039871	0.0313942		0.853598	-0.203732	0.0574745
0.854408	2.39735	0.614478		0.854474	-0.079162	0.0104258		0.85424	-0.351898	0.0364346		0.854744	-0.039051	0.0314536		0.85443	-0.205629	0.0573438
0.85524	2.39765	0.614489		0.855306	-0.079342	0.010421		0.855072	-0.353591	0.0363262		0.855576	-0.038415	0.0314997		0.855262	-0.207216	0.0572345
0.856072	2.39828	0.614512		0.856138	-0.079265	0.010423		0.855904	-0.354113	0.0362928		0.856408	-0.038721	0.0314776		0.856094	-0.20795	0.0571839
0.856904	2.39827	0.614512		0.85697	-0.078769	0.0104362		0.856735	-0.353303	0.0363446		0.857241	-0.040205	0.03137		0.856926	-0.207589	0.0572088
0.857736	2.39886	0.614533		0.857802	-0.078218	0.0104508		0.857567	-0.353396	0.0363387		0.858073	-0.041007	0.0313119		0.857758	-0.208136	0.0571711
0.858568	2.39975	0.614566		0.858634	-0.07678	0.010489		0.858399	-0.353862	0.0363088		0.858905	-0.041307	0.0312901		0.85859	-0.207866	0.0571897
0.8594	2.40283	0.614681		0.859466	-0.076278	0.0105023		0.859231	-0.353705	0.0363189		0.859738	-0.041294	0.0312911		0.859422	-0.206774	0.0572649
0.860232	2.40388	0.614719		0.860298	-0.075002	0.0105362		0.860062	-0.353628	0.0363238		0.86057	-0.041208	0.0312973		0.860254	-0.208154	0.0571698
0.861064	2.40426	0.614733		0.86113	-0.071745	0.0106227		0.860894	-0.353672	0.036321		0.861402	-0.041068	0.0313074		0.861086	-0.20841	0.0571522
0.861896	2.40564	0.614784		0.861962	-0.070913	0.0106448		0.861726	-0.354513	0.0362672		0.862234	-0.040425	0.031354		0.861918	-0.211114	0.0569659
0.862728	2.40504	0.614762		0.862794	-0.071333	0.0106336		0.862558	-0.354898	0.0362425		0.863067	-0.039927	0.0313901		0.86275	-0.211153	0.0569632
0.86356	2.40587	0.614793		0.863626	-0.06995	0.0106704		0.86339	-0.354883	0.0362435		0.863899	-0.038848	0.0314684		0.863582	-0.211538	0.0569366
0.864392	2.40731	0.614846		0.864458	-0.069329	0.0106869		0.864221	-0.354418	0.0362732		0.864731	-0.038605	0.031486		0.864414	-0.2125	0.0568704
0.865224	2.40729	0.614846		0.86529	-0.069316	0.0106872		0.865053	-0.3554	0.0362104		0.865563	-0.039994	0.0313853		0.865246	-0.214296	0.0567466
0.866056	2.40775	0.614863		0.866122	-0.068805	0.0107008		0.865885	-0.355889	0.0361791		0.866396	-0.039814	0.0313983		0.866078	-0.213777	0.0567824
0.866888	2.40883	0.614903		0.866954	-0.068069	0.0107203		0.866717	-0.355205	0.0362228		0.867228	-0.038554	0.0314897		0.86691	-0.21347	0.0568035
0.867719	2.40834	0.614885		0.867786	-0.066386	0.010765		0.867548	-0.354521	0.0362666		0.86806	-0.038575	0.0314881		0.867742	-0.211257	0.056956
0.868551	2.4089	0.614905		0.868618	-0.064807	0.0108069		0.86838	-0.354545	0.0362651		0.868893	-0.038255	0.0315113		0.868574	-0.213277	0.0568168
0.869383	2.41046	0.614963		0.86945	-0.065191	0.0107967		0.869212	-0.353594	0.036326		0.869725	-0.037903	0.0315369		0.869406	-0.215131	0.0566891
0.870215	2.41133	0.614995		0.870282	-0.065889	0.0107782		0.870044	-0.353867	0.0363085		0.870557	-0.038803	0.0314716		0.870237	-0.214926	0.0567032
0.871047	2.41126	0.614993		0.871114	-0.064051	0.010827		0.870876	-0.353803	0.0363126		0.871389	-0.038823	0.0314702		0.871069	-0.215123	0.0566896
0.871879	2.41027	0.614956		0.871946	-0.061925	0.0108835		0.871707	-0.354444	0.0362716		0.872222	-0.03846	0.0314965		0.871901	-0.214707	0.0567183
0.872711	2.40994	0.614944		0.872778	-0.060316	0.0109262		0.872539	-0.354597	0.0362618		0.873054	-0.039115	0.031449		0.872733	-0.215704	0.0566496
0.873543	2.41064	0.61497		0.87361	-0.05883	0.0109656		0.873371	-0.355793	0.0361852		0.873886	-0.039651	0.0314101		0.873565	-0.215261	0.0566801
0.874375	2.41145	0.615		0.874442	-0.057575	0.010999		0.874203	-0.356423	0.0361449		0.874718	-0.039279	0.0314371		0.874397	-0.214201	0.0567532
0.875207	2.41283	0.615051		0.875274	-0.056888	0.0110172		0.875035	-0.355098	0.0362297		0.875551	-0.038969	0.0314596		0.875229	-0.212585	0.0568645
0.876039	2.41178	0.615012		0.876106	-0.055441	0.0110556		0.875866	-0.354394	0.0362748		0.876383	-0.039456	0.0314243		0.876061	-0.211541	0.0569364
0.876871	2.41247	0.615037		0.876938	-0.053003	0.0111204		0.876698	-0.354795	0.0362491		0.877215	-0.039705	0.0314062		0.876893	-0.212024	0.0569032
0.877703	2.41304	0.615059		0.87777	-0.050846	0.0111777		0.87753	-0.355514	0.0362031		0.878048	-0.039121	0.0314486		0.877725	-0.212853	0.056846
0.878535	2.41256	0.615041		0.878602	-0.048723	0.011234		0.878362	-0.356266	0.0361549		0.87888	-0.039227	0.0314409		0.878557	-0.212707	0.0568561
0.879367	2.41263	0.615043		0.879434	-0.047405	0.011269		0.879193	-0.35627	0.0361547		0.879712	-0.039428	0.0314263		0.879389	-0.212479	0.0568718
0.880199	2.41076	0.614974		0.880266	-0.046716	0.0112873		0.880025	-0.356695	0.0361274		0.880544	-0.039049	0.0314538		0.880221	-0.213589	0.0567953
0.881031	2.41284	0.615051		0.881098	-0.046696	0.0112879		0.880857	-0.358001	0.0360438		0.881377	-0.039128	0.0314481		0.881053	-0.213419	0.056807
0.881863	2.41489	0.615127		0.88193	-0.046731	0.0112869		0.881689	-0.359631	0.0359395		0.882209	-0.039741	0.0314036		0.881885	-0.214344	0.0567433
0.882694	2.41472	0.615121		0.882762	-0.046042	0.0113052		0.88252	-0.360027	0.0359141		0.883041	-0.040167	0.0313727		0.882717	-0.213335	0.0568128
0.883526	2.41487	0.615126		0.883595	-0.04439	0.0113491		0.883352	-0.359561	0.0359439		0.883873	-0.040186	0.0313714		0.883549	-0.213915	0.0567729
0.884358	2.41415	0.6151		0.884427	-0.042896	0.0113888		0.884184	-0.360161	0.0359055		0.884706	-0.040393	0.0313564		0.884381	-0.214641	0.0567228
0.88519	2.41305	0.615059		0.885258	-0.040135	0.0114621		0.885016	-0.360025	0.0359142		0.885538	-0.039289	0.0314364		0.885213	-0.214851	0.0567084
0.886022	2.41322	0.615065		0.886091	-0.038536	0.0115045		0.885848	-0.359732	0.035933		0.88637	-0.037268	0.0315829		0.886045	-0.214147	0.0567569
0.886854	2.41369	0.615083		0.886923	-0.038725	0.0114995		0.886679	-0.3603	0.0358966		0.887203	-0.036723	0.0316224		0.886877	-0.214789	0.0567126
0.887686	2.41402	0.615095		0.887755	-0.038764	0.0114985		0.887511	-0.362044	0.035785		0.888035	-0.036889	0.0316104		0.887709	-0.215024	0.0566964
0.888518	2.41417	0.6151		0.888587	-0.038099	0.0115161		0.888343	-0.364133	0.0356512		0.888867	-0.036733	0.0316217		0.888541	-0.215028	0.0566962
0.88935	2.41546	0.615148		0.889419	-0.037048	0.0115441		0.889175	-0.365348	0.0355734		0.889699	-0.036914	0.0316085		0.889373	-0.213435	0.0568059
0.890182	2.41561	0.615154		0.890251	-0.034847	0.0116025		0.890007	-0.367059	0.0354639		0.890532	-0.035868	0.0316844		0.890205	-0.210227	0.057027
0.891014	2.41556	0.615152		0.891083	-0.032255	0.0116713		0.890838	-0.367107	0.0354608		0.891364	-0.034081	0.0318139		0.891037	-0.208229	0.0571647
0.891846	2.4158	0.615161		0.891915	-0.031696	0.0116862		0.89167	-0.367879	0.0354114		0.892196	-0.034379	0.0317923		0.891869	-0.208642	0.0571362
0.892678	2.41572	0.615158		0.892747	-0.031819	0.0116829		0.892502	-0.368164	0.0353931		0.893028	-0.034632	0.031774		0.892701	-0.207708	0.0572006
0.89351	2.41669	0.615194		0.893579	-0.03156	0.0116898		0.893334	-0.369073	0.0353349		0.893861	-0.033898	0.0318272		0.893533	-0.205901	0.0573251
0.894342	2.41615	0.615174		0.894411	-0.030392	0.0117208		0.894165	-0.368763	0.0353548		0.894693	-0.033675	0.0318433		0.894365	-0.206679	0.0572715
0.895174	2.41606	0.61517		0.895243	-0.029289	0.0117501		0.894997	-0.369082	0.0353343		0.895525	-0.034084	0.0318137		0.895196	-0.208848	0.057122
0.896006	2.41507	0.615134		0.896075	-0.028671	0.0117665		0.895829	-0.369216	0.0353257		0.896358	-0.034184	0.0318064		0.896028	-0.210782	0.0569887
0.896838	2.41558	0.615153		0.896907	-0.02728	0.0118034		0.896661	-0.369826	0.0352867		0.89719	-0.033391	0.0318639		0.89686	-0.212088	0.0568988
0.897669	2.41598	0.615167		0.897739	-0.02529	0.0118563		0.897493	-0.369877	0.0352834		0.898022	-0.033034	0.0318898		0.897692	-0.211122	0.0569653
0.898501	2.41621	0.615176		0.898571	-0.024603	0.0118745		0.898324	-0.369286	0.0353213		0.898854	-0.032892	0.0319001		0.898524	-0.21022	0.0570275
0.899333	2.41686	0.6152		0.899403	-0.024424	0.0118793		0.899156	-0.368354	0.0353809		0.899687	-0.032038	0.031962		0.899356	-0.209022	0.05711
0.900165	2.41719	0.615212		0.900235	-0.024124	0.0118872		0.899988	-0.367841	0.0354138		0.900519	-0.03093	0.0320423		0.900188	-0.208755	0.0571284
0.900997	2.41659	0.61519		0.901067	-0.02149	0.0119572		0.90082	-0.367467	0.0354377		0.901351	-0.030563	0.0320689		0.90102	-0.20693	0.0572542
0.901829	2.41555	0.615152		0.901899	-0.020414	0.0119858		0.901652	-0.366584	0.0354943		0.902183	-0.030332	0.0320857		0.901852	-0.206272	0.0572995
0.902661	2.41581	0.615161		0.902731	-0.020465	0.0119844		0.902483	-0.365387	0.0355709		0.903016	-0.030157	0.0320983		0.902684	-0.204856	0.0573971
0.903493	2.41586	0.615163		0.903563	-0.019685	0.0120051		0.903315	-0.364615	0.0356203		0.903848	-0.030707	0.0320585		0.903516	-0.204903	0.0573938
0.904325	2.41599	0.615168		0.904395	-0.019226	0.0120173		0.904147	-0.365032	0.0355936		0.90468	-0.031538	0.0319982		0.904348	-0.205022	0.0573856
0.905157	2.41625	0.615177		0.905227	-0.018569	0.0120347		0.904979	-0.365371	0.0355719		0.905513	-0.032048	0.0319613		0.90518	-0.205363	0.0573621
0.905989	2.41723	0.615214		0.906059	-0.018711	0.012031		0.90581	-0.36599	0.0355323		0.906345	-0.032409	0.0319351		0.906012	-0.205644	0.0573428
0.906821	2.41683	0.615199		0.906891	-0.017711	0.0120575		0.906642	-0.367168	0.0354569		0.907177	-0.033109	0.0318844		0.906844	-0.206393	0.0572912
0.907653	2.41772	0.615232		0.907723	-0.015531	0.0121154		0.907474	-0.367829	0.0354146		0.908009	-0.033847	0.0318309		0.907676	-0.206878	0.0572578
0.908485	2.41797	0.615241		0.908555	-0.013787	0.0121617		0.908306	-0.366846	0.0354775		0.908842	-0.033924	0.0318253		0.908508	-0.207965	0.0571829
0.909317	2.41935	0.615292		0.909387	-0.012367	0.0121994		0.909138	-0.365395	0.0355704		0.909674	-0.034534	0.0317811		0.90934	-0.208948	0.0571151
0.910149	2.41761	0.615228		0.910219	-0.012107	0.0122063		0.909969	-0.36461	0.0356207		0.910506	-0.035035	0.0317447		0.910172	-0.209061	0.0571073
0.910981	2.41707	0.615208		0.911051	-0.012138	0.0122055		0.910801	-0.363496	0.035692		0.911338	-0.03602	0.0316733		0.911004	-0.210292	0.0570225
0.911813	2.41729	0.615216		0.911883	-0.011251	0.0122291		0.911633	-0.362944	0.0357273		0.912171	-0.037279	0.0315821		0.911836	-0.212527	0.0568685
0.912645	2.41931	0.615291		0.912715	-0.010314	0.012254		0.912465	-0.362382	0.0357633		0.913003	-0.03842	0.0314994		0.912668	-0.212933	0.0568405
0.913476	2.42071	0.615343		0.913547	-0.009227	0.0122828		0.913296	-0.361435	0.035824		0.913835	-0.038529	0.0314915		0.9135	-0.21415	0.0567567
0.914308	2.42127	0.615363		0.914379	-0.008306	0.0123073		0.914128	-0.360416	0.0358892		0.914668	-0.039058	0.0314531		0.914332	-0.214994	0.0566985
0.91514	2.42197	0.615389		0.915211	-0.00726	0.012335		0.91496	-0.360442	0.0358875		0.9155	-0.039564	0.0314165		0.915164	-0.213682	0.0567889
0.915972	2.42149	0.615372		0.916043	-0.006357	0.012359		0.915792	-0.360828	0.0358628		0.916332	-0.040477	0.0313503		0.915996	-0.212383	0.0568784
0.916804	2.42248	0.615408		0.916875	-0.004671	0.0124038		0.916624	-0.36131	0.035832		0.917164	-0.040923	0.0313179		0.916828	-0.21324	0.0568194
0.917636	2.4238	0.615457		0.917707	-0.004862	0.0123987		0.917455	-0.361765	0.0358028		0.917997	-0.04108	0.0313066		0.91766	-0.212343	0.0568812
0.918468	2.42437	0.615478		0.918539	-0.00485	0.012399		0.918287	-0.362605	0.035749		0.918829	-0.040608	0.0313408		0.918492	-0.212769	0.0568518
0.9193	2.42414	0.61547		0.919371	-0.005206	0.0123896		0.919119	-0.363576	0.0356869		0.919661	-0.039964	0.0313875		0.919324	-0.213512	0.0568006
0.920132	2.42446	0.615481		0.920203	-0.003224	0.0124422		0.919951	-0.364474	0.0356294		0.920493	-0.039974	0.0313867		0.920155	-0.215235	0.0566819
0.920964	2.42568	0.615527		0.921035	-0.002286	0.0124671		0.920783	-0.364798	0.0356086		0.921326	-0.041123	0.0313034		0.920987	-0.216304	0.0566082
0.921796	2.42805	0.615614		0.921867	-0.002788	0.0124538		0.921614	-0.364382	0.0356353		0.922158	-0.041879	0.0312486		0.921819	-0.218735	0.0564407
0.922628	2.42851	0.615631		0.922699	-0.002386	0.0124645		0.922446	-0.364643	0.0356185		0.92299	-0.042639	0.0311936		0.922651	-0.219561	0.0563838
0.92346	2.42819	0.61562		0.923531	-0.000866	0.0125048		0.923278	-0.365269	0.0355785		0.923823	-0.044052	0.0310911		0.923483	-0.220808	0.0562979
0.924292	2.42821	0.61562		0.924363	0.000779	0.0125485		0.92411	-0.364908	0.0356016		0.924655	-0.044968	0.0310247		0.924315	-0.221923	0.0562211
0.925124	2.42913	0.615655		0.925195	0.003169	0.012612		0.924941	-0.364543	0.035625		0.925487	-0.045089	0.031016		0.925147	-0.221528	0.0562483
0.925956	2.42959	0.615671		0.926027	0.004606	0.0126501		0.925773	-0.365026	0.035594		0.926319	-0.045802	0.0309643		0.925979	-0.220505	0.0563188
0.926788	2.43076	0.615715		0.926859	0.005545	0.0126751		0.926605	-0.365706	0.0355505		0.927152	-0.0464	0.0309209		0.926811	-0.220238	0.0563372
0.92762	2.43162	0.615747		0.927691	0.006128	0.0126906		0.927437	-0.364625	0.0356197		0.927984	-0.046526	0.0309118		0.927643	-0.22006	0.0563494
0.928452	2.43035	0.6157		0.928523	0.006511	0.0127007		0.928268	-0.363021	0.0357224		0.928816	-0.046361	0.0309238		0.928475	-0.220169	0.0563419
0.929283	2.42985	0.615681		0.929355	0.007092	0.0127162		0.9291	-0.362874	0.0357318		0.929648	-0.047284	0.0308569		0.929307	-0.219987	0.0563545
0.930115	2.42858	0.615634		0.930187	0.00854	0.0127546		0.929932	-0.362876	0.0357317		0.930481	-0.04739	0.0308492		0.930139	-0.22088	0.0562929
0.930947	2.42909	0.615653		0.931019	0.010156	0.0127975		0.930764	-0.36215	0.0357782		0.931313	-0.047223	0.0308613		0.930971	-0.222006	0.0562153
0.931779	2.42998	0.615686		0.931851	0.010855	0.0128161		0.931596	-0.362161	0.0357775		0.932145	-0.046722	0.0308976		0.931803	-0.222266	0.0561974
0.932611	2.4307	0.615713		0.932683	0.010057	0.0127949		0.932427	-0.362195	0.0357753		0.932978	-0.045916	0.030956		0.932635	-0.222877	0.0561553
0.933443	2.42852	0.615632		0.933515	0.010677	0.0128114		0.933259	-0.363048	0.0357207		0.93381	-0.044452	0.0310621		0.933467	-0.22367	0.0561007
0.934275	2.42988	0.615682		0.934347	0.012513	0.0128601		0.934091	-0.364307	0.0356401		0.934642	-0.044229	0.0310783		0.934299	-0.22432	0.0560559
0.935107	2.42939	0.615664		0.935179	0.013576	0.0128883		0.934923	-0.364329	0.0356387		0.935474	-0.045098	0.0310153		0.935131	-0.225118	0.0560009
0.935939	2.42859	0.615635		0.936011	0.013407	0.0128838		0.935755	-0.364534	0.0356255		0.936307	-0.045549	0.0309826		0.935963	-0.225603	0.0559675
0.936771	2.42892	0.615647		0.936843	0.013417	0.0128841		0.936586	-0.365685	0.0355518		0.937139	-0.04483	0.0310347		0.936795	-0.225621	0.0559662
0.937603	2.42887	0.615645		0.937675	0.014002	0.0128996		0.937418	-0.365743	0.0355481		0.937971	-0.04445	0.0310623		0.937627	-0.224646	0.0560334
0.938435	2.43012	0.615691		0.938507	0.015149	0.0129301		0.93825	-0.365701	0.0355508		0.938803	-0.044968	0.0310247		0.938459	-0.225519	0.0559733
0.939267	2.42949	0.615668		0.939339	0.01513	0.0129296		0.939082	-0.366129	0.0355234		0.939636	-0.045793	0.0309649		0.939291	-0.225986	0.0559411
0.940099	2.43062	0.61571		0.940171	0.017005	0.0129794		0.939913	-0.366468	0.0355017		0.940468	-0.046181	0.0309368		0.940123	-0.225618	0.0559664
0.940931	2.43076	0.615715		0.941003	0.017117	0.0129824		0.940745	-0.366029	0.0355298		0.9413	-0.046342	0.0309251		0.940955	-0.225222	0.0559937
0.941763	2.4293	0.615661		0.941835	0.018438	0.0130174		0.941577	-0.36584	0.0355419		0.942133	-0.046186	0.0309364		0.941787	-0.224913	0.056015
0.942595	2.42835	0.615625		0.942667	0.018522	0.0130197		0.942409	-0.366101	0.0355252		0.942965	-0.046871	0.0308868		0.942619	-0.224199	0.0560642
0.943427	2.42937	0.615663		0.943499	0.021086	0.0130878		0.943241	-0.366337	0.0355101		0.943797	-0.047277	0.0308574		0.943451	-0.224953	0.0560123
0.944259	2.42989	0.615683		0.944331	0.021325	0.0130941		0.944072	-0.366038	0.0355292		0.944629	-0.045607	0.0309784		0.944283	-0.22555	0.0559711
0.94509	2.42887	0.615645		0.945163	0.021981	0.0131115		0.944904	-0.366566	0.0354954		0.945462	-0.04439	0.0310666		0.945114	-0.226408	0.055912
0.945922	2.42835	0.615626		0.945995	0.021879	0.0131088		0.945736	-0.367339	0.0354459		0.946294	-0.044369	0.0310682		0.945946	-0.227631	0.0558277
0.946754	2.42899	0.615649		0.946827	0.023727	0.0131579		0.946568	-0.367586	0.0354301		0.947126	-0.043797	0.0311096		0.946778	-0.229348	0.0557094
0.947586	2.42779	0.615605		0.947659	0.023785	0.0131594		0.947399	-0.367212	0.0354541		0.947958	-0.043662	0.0311194		0.94761	-0.230013	0.0556636
0.948418	2.42844	0.615629		0.948491	0.024741	0.0131848		0.948231	-0.368207	0.0353904		0.948791	-0.043991	0.0310956		0.948442	-0.230196	0.055651
0.94925	2.43167	0.615749		0.949323	0.0265	0.0132315		0.949063	-0.369504	0.0353073		0.949623	-0.044178	0.031082		0.949274	-0.229749	0.0556818
0.950082	2.43133	0.615736		0.950155	0.027701	0.0132634		0.949895	-0.37006	0.0352717		0.950455	-0.043811	0.0311086		0.950106	-0.230006	0.0556641
0.950914	2.43328	0.615808		0.950987	0.027948	0.01327		0.950727	-0.37047	0.0352455		0.951288	-0.043395	0.0311388		0.950938	-0.228925	0.0557386
0.951746	2.43312	0.615802		0.951819	0.029756	0.013318		0.951558	-0.371569	0.0351751		0.95212	-0.043592	0.0311245		0.95177	-0.228691	0.0557547
0.952578	2.4323	0.615772		0.952651	0.030774	0.013345		0.95239	-0.372294	0.0351287		0.952952	-0.043938	0.0310994		0.952602	-0.228497	0.0557681
0.95341	2.43287	0.615793		0.953483	0.032357	0.013387		0.953222	-0.371657	0.0351695		0.953784	-0.044495	0.031059		0.953434	-0.22761	0.0558292
0.954242	2.43277	0.615789		0.954315	0.034562	0.0134456		0.954054	-0.371341	0.0351897		0.954617	-0.044763	0.0310396		0.954266	-0.227169	0.0558596
0.955074	2.43221	0.615769		0.955147	0.035078	0.0134593		0.954886	-0.370742	0.035228		0.955449	-0.044548	0.0310552		0.955098	-0.226974	0.055873
0.955906	2.4322	0.615768		0.955979	0.033605	0.0134202		0.955717	-0.37108	0.0352064		0.956281	-0.044191	0.0310811		0.95593	-0.226535	0.0559033
0.956738	2.43351	0.615817		0.956811	0.035198	0.0134625		0.956549	-0.371364	0.0351882		0.957113	-0.043579	0.0311254		0.956762	-0.226897	0.0558783
0.95757	2.43411	0.615839		0.957643	0.036238	0.0134901		0.957381	-0.370582	0.0352383		0.957946	-0.043436	0.0311358		0.957594	-0.228337	0.0557791
0.958402	2.43323	0.615806		0.958475	0.037245	0.0135168		0.958213	-0.370306	0.035256		0.958778	-0.043599	0.031124		0.958426	-0.228938	0.0557377
0.959234	2.43161	0.615746		0.959307	0.03937	0.0135733		0.959044	-0.370572	0.0352389		0.95961	-0.043521	0.0311296		0.959258	-0.228728	0.0557521
0.960065	2.43166	0.615748		0.960139	0.040531	0.0136041		0.959876	-0.369913	0.0352811		0.960443	-0.04371	0.0311159		0.96009	-0.229338	0.0557101
0.960897	2.43184	0.615755		0.960971	0.040328	0.0135987		0.960708	-0.369867	0.0352841		0.961275	-0.043683	0.0311179		0.960922	-0.231014	0.0555946
0.961729	2.43197	0.61576		0.961803	0.04055	0.0136046		0.96154	-0.370367	0.035252		0.962107	-0.043786	0.0311104		0.961754	-0.230937	0.0555999
0.962561	2.43203	0.615762		0.962635	0.04104	0.0136176		0.962372	-0.371437	0.0351835		0.962939	-0.043342	0.0311426		0.962586	-0.231676	0.055549
0.963393	2.4317	0.61575		0.963467	0.042889	0.0136667		0.963203	-0.37285	0.0350931		0.963772	-0.04333	0.0311435		0.963418	-0.232514	0.0554913
0.964225	2.42952	0.615669		0.964299	0.043153	0.0136737		0.964035	-0.374108	0.0350125		0.964604	-0.041819	0.031253		0.96425	-0.231888	0.0555344
0.965057	2.42826	0.615622		0.965131	0.044796	0.0137174		0.964867	-0.375163	0.034945		0.965436	-0.04147	0.0312783		0.965082	-0.230686	0.0556172
0.965889	2.42936	0.615663		0.965963	0.046271	0.0137565		0.965699	-0.376385	0.0348667		0.966268	-0.041964	0.0312425		0.965914	-0.228964	0.0557359
0.966721	2.43134	0.615736		0.966796	0.047754	0.0137959		0.966531	-0.376829	0.0348383		0.967101	-0.041582	0.0312702		0.966746	-0.228886	0.0557413
0.967553	2.43149	0.615742		0.967628	0.047582	0.0137913		0.967362	-0.376633	0.0348508		0.967933	-0.041141	0.0313021		0.967578	-0.227976	0.055804
0.968385	2.43076	0.615715		0.968459	0.049235	0.0138352		0.968194	-0.37732	0.0348069		0.968765	-0.040921	0.0313181		0.96841	-0.227834	0.0558137
0.969217	2.4312	0.615731		0.969292	0.051024	0.0138827		0.969026	-0.378315	0.0347432		0.969598	-0.040691	0.0313348		0.969242	-0.227827	0.0558142
0.970049	2.42903	0.615651		0.970124	0.051808	0.0139035		0.969858	-0.378167	0.0347526		0.97043	-0.040689	0.0313349		0.970074	-0.227665	0.0558254
0.970881	2.43026	0.615696		0.970956	0.052237	0.0139149		0.970689	-0.378312	0.0347433		0.971262	-0.039392	0.0314289		0.970905	-0.227529	0.0558348
0.971713	2.43029	0.615697		0.971788	0.052642	0.0139257		0.971521	-0.37922	0.0346852		0.972094	-0.039821	0.0313978		0.971737	-0.229387	0.0557067
0.972545	2.43133	0.615736		0.97262	0.052577	0.013924		0.972353	-0.379712	0.0346537		0.972927	-0.039811	0.0313985		0.972569	-0.229684	0.0556863
0.973377	2.43169	0.615749		0.973452	0.053212	0.0139408		0.973185	-0.379506	0.0346669		0.973759	-0.039856	0.0313953		0.973401	-0.229787	0.0556792
0.974209	2.43141	0.615739		0.974284	0.055154	0.0139924		0.974017	-0.379533	0.0346652		0.974591	-0.039479	0.0314226		0.974233	-0.229143	0.0557235
0.97504	2.4315	0.615742		0.975116	0.056088	0.0140172		0.974848	-0.380016	0.0346342		0.975423	-0.039534	0.0314186		0.975065	-0.23045	0.0556335
0.975872	2.43171	0.61575		0.975948	0.056158	0.0140191		0.97568	-0.380486	0.0346041		0.976256	-0.03999	0.0313856		0.975897	-0.231396	0.0555683
0.976704	2.43258	0.615782		0.97678	0.059417	0.0141056		0.976512	-0.380338	0.0346136		0.977088	-0.040947	0.0313162		0.976729	-0.232076	0.0555214
0.977536	2.43336	0.615811		0.977612	0.062213	0.0141798		0.977344	-0.380077	0.0346303		0.97792	-0.041717	0.0312604		0.977561	-0.232128	0.0555179
0.978368	2.43392	0.615832		0.978444	0.063036	0.0142017		0.978175	-0.379897	0.0346419		0.978753	-0.043212	0.031152		0.978393	-0.23242	0.0554977
0.9792	2.43376	0.615826		0.979276	0.064765	0.0142476		0.979007	-0.380086	0.0346298		0.979585	-0.043025	0.0311656		0.979225	-0.233447	0.055427
0.980032	2.43431	0.615846		0.980108	0.066714	0.0142994		0.979839	-0.380737	0.0345881		0.980417	-0.042943	0.0311715		0.980057	-0.233999	0.0553889
0.980864	2.43551	0.615891		0.98094	0.069173	0.0143647		0.980671	-0.380473	0.034605		0.981249	-0.042568	0.0311987		0.980889	-0.23377	0.0554047
0.981696	2.43546	0.615889		0.981772	0.072125	0.0144431		0.981503	-0.380348	0.034613		0.982082	-0.043533	0.0311288		0.981721	-0.233789	0.0554034
0.982528	2.4353	0.615883		0.982604	0.074261	0.0144998		0.982334	-0.381233	0.0345563		0.982914	-0.043957	0.031098		0.982553	-0.235361	0.0552951
0.98336	2.43562	0.615895		0.983436	0.076558	0.0145608		0.983166	-0.381736	0.0345241		0.983746	-0.044069	0.0310899		0.983385	-0.237524	0.055146
0.984192	2.43698	0.615945		0.984268	0.077355	0.0145819		0.983998	-0.381483	0.0345403		0.984578	-0.04331	0.0311449		0.984217	-0.237717	0.0551327
0.985024	2.44019	0.616064		0.9851	0.077814	0.0145941		0.98483	-0.380834	0.0345819		0.985411	-0.04314	0.0311572		0.985049	-0.23776	0.0551298
0.985856	2.44107	0.616096		0.985932	0.0774	0.0145831		0.985661	-0.380497	0.0346034		0.986243	-0.043913	0.0311012		0.985881	-0.239046	0.0550412
0.986688	2.44169	0.616119		0.986764	0.078364	0.0146087		0.986493	-0.380764	0.0345863		0.987075	-0.044103	0.0310874		0.986713	-0.240796	0.0549206
0.98752	2.44008	0.61606		0.987596	0.079227	0.0146316		0.987325	-0.381445	0.0345427		0.987908	-0.044158	0.0310834		0.987545	-0.241819	0.0548501
0.988352	2.44037	0.616071		0.988428	0.08128	0.0146862		0.988157	-0.381474	0.0345409		0.98874	-0.044148	0.0310842		0.988377	-0.242863	0.0547782
0.989184	2.44208	0.616134		0.98926	0.080745	0.0146719		0.988989	-0.380384	0.0346107		0.989572	-0.044813	0.031036		0.989209	-0.243798	0.0547137
0.990016	2.44124	0.616103		0.990092	0.079756	0.0146457		0.98982	-0.378976	0.0347008		0.990404	-0.046108	0.0309421		0.990041	-0.244941	0.054635
0.990847	2.44155	0.616114		0.990924	0.079256	0.0146324		0.990652	-0.379031	0.0346973		0.991237	-0.046094	0.0309431		0.990873	-0.245163	0.0546197
0.991679	2.44129	0.616105		0.991756	0.079152	0.0146296		0.991484	-0.379871	0.0346435		0.992069	-0.046223	0.0309338		0.991705	-0.24503	0.0546288
0.992511	2.44114	0.616099		0.992588	0.079687	0.0146439		0.992316	-0.379579	0.0346622		0.992901	-0.046184	0.0309366		0.992537	-0.244782	0.0546459
0.993343	2.44159	0.616116		0.99342	0.080552	0.0146668		0.993147	-0.379228	0.0346847		0.993733	-0.046166	0.0309379		0.993369	-0.244914	0.0546368
0.994175	2.44343	0.616184		0.994252	0.082263	0.0147123		0.993979	-0.380228	0.0346207		0.994566	-0.046381	0.0309223		0.994201	-0.2467	0.0545138
0.995007	2.4439	0.616201		0.995084	0.081734	0.0146982		0.994811	-0.381997	0.0345074		0.995398	-0.046632	0.0309041		0.995032	-0.248691	0.0543766
0.995839	2.4444	0.61622		0.995916	0.081699	0.0146973		0.995643	-0.382335	0.0344858		0.99623	-0.046463	0.0309164		0.995865	-0.248564	0.0543853
0.996671	2.44477	0.616233		0.996748	0.082668	0.014723		0.996475	-0.382017	0.0345061		0.997063	-0.046839	0.0308891		0.996696	-0.248143	0.0544143
0.997503	2.44498	0.616241		0.99758	0.081892	0.0147024		0.997306	-0.3822	0.0344944		0.997895	-0.045592	0.0309795		0.997528	-0.248263	0.0544061
0.998335	2.44443	0.616221		0.998412	0.08208	0.0147074		0.998138	-0.382355	0.0344845		0.998727	-0.044105	0.0310873		0.99836	-0.249049	0.0543519
0.999167	2.44401	0.616205		0.999244	0.083669	0.0147496		0.99897	-0.382446	0.0344787		0.999559	-0.04255	0.0312		0.999192	-0.248456	0.0543928
0.999999	2.44662	0.616302		1.00008	0.083883	0.0147553		0.999802	-0.381643	0.0345301		1.00039	-0.041635	0.0312663		1.00002	-0.247376	0.0544672
1.00083	2.44743	0.616332		1.00091	0.083515	0.0147455		1.00063	-0.380936	0.0345753		1.00122	-0.041812	0.0312535		1.00086	-0.24774	0.0544421
1.00166	2.44749	0.616334		1.00174	0.084196	0.0147636		1.00147	-0.380567	0.034599		1.00206	-0.041777	0.031256		1.00169	-0.249634	0.0543116
1.00249	2.4481	0.616357		1.00257	0.083287	0.0147394		1.0023	-0.38001	0.0346346		1.00289	-0.041029	0.0313103		1.00252	-0.250444	0.0542558
1.00333	2.44788	0.616349		1.0034	0.082772	0.0147258		1.00313	-0.379623	0.0346594		1.00372	-0.040364	0.0313585		1.00335	-0.248978	0.0543568
1.00416	2.44821	0.616361		1.00424	0.081597	0.0146946		1.00396	-0.378992	0.0346998		1.00455	-0.039774	0.0314012		1.00418	-0.248106	0.0544169
1.00499	2.44831	0.616365		1.00507	0.082161	0.0147095		1.00479	-0.378615	0.0347239		1.00538	-0.039847	0.0313959		1.00502	-0.24935	0.0543312
1.00582	2.44775	0.616344		1.0059	0.083295	0.0147397		1.00562	-0.378491	0.0347319		1.00622	-0.039544	0.0314179		1.00585	-0.250281	0.054267
1.00665	2.44779	0.616345		1.00673	0.084941	0.0147834		1.00646	-0.379041	0.0346967		1.00705	-0.039163	0.0314455		1.00668	-0.25092	0.054223
1.00749	2.44718	0.616323		1.00756	0.083496	0.014745		1.00729	-0.378568	0.034727		1.00788	-0.038386	0.0315018		1.00751	-0.250327	0.0542638
1.00832	2.4478	0.616346		1.0084	0.083286	0.0147394		1.00812	-0.377126	0.0348193		1.00871	-0.038201	0.0315153		1.00834	-0.249818	0.0542989
1.00915	2.44855	0.616373		1.00923	0.082012	0.0147056		1.00895	-0.376593	0.0348534		1.00955	-0.038225	0.0315135		1.00918	-0.249665	0.0543094
1.00998	2.44824	0.616362		1.01006	0.082579	0.0147206		1.00978	-0.376121	0.0348836		1.01038	-0.037522	0.0315645		1.01001	-0.249756	0.0543032
1.01081	2.44798	0.616352		1.01089	0.084156	0.0147625		1.01062	-0.375802	0.0349041		1.01121	-0.035249	0.0317292		1.01084	-0.250385	0.0542598
1.01165	2.44983	0.616421		1.01172	0.085276	0.0147923		1.01145	-0.376153	0.0348816		1.01204	-0.035521	0.0317095		1.01167	-0.252804	0.0540932
1.01248	2.45015	0.616433		1.01256	0.086595	0.0148273		1.01228	-0.374984	0.0349564		1.01288	-0.037209	0.0315872		1.0125	-0.255468	0.0539096
1.01331	2.45014	0.616432		1.01339	0.087076	0.0148401		1.01311	-0.375317	0.0349351		1.01371	-0.037774	0.0315462		1.01334	-0.256468	0.0538407
1.01414	2.45004	0.616429		1.01422	0.086356	0.0148209		1.01394	-0.375385	0.0349308		1.01454	-0.036899	0.0316096		1.01417	-0.257152	0.0537935
1.01497	2.44815	0.616359		1.01505	0.085469	0.0147974		1.01477	-0.374803	0.034968		1.01537	-0.037049	0.0315988		1.015	-0.257794	0.0537493
1.01581	2.44749	0.616334		1.01588	0.085604	0.014801		1.01561	-0.374674	0.0349763		1.01621	-0.036388	0.0316467		1.01583	-0.258331	0.0537123
1.01664	2.44829	0.616364		1.01672	0.085589	0.0148006		1.01644	-0.375143	0.0349463		1.01704	-0.03759	0.0315595		1.01666	-0.259344	0.0536425
1.01747	2.4496	0.616413		1.01755	0.085714	0.0148039		1.01727	-0.375463	0.0349258		1.01787	-0.036366	0.0316483		1.0175	-0.261202	0.0535145
1.0183	2.44964	0.616414		1.01838	0.087308	0.0148462		1.0181	-0.376161	0.0348811		1.0187	-0.037437	0.0315706		1.01833	-0.263137	0.0533811
1.01913	2.44997	0.616426		1.01921	0.08731	0.0148463		1.01893	-0.377086	0.0348218		1.01953	-0.03819	0.0315161		1.01916	-0.263459	0.053359
1.01997	2.45126	0.616474		1.02004	0.086464	0.0148238		1.01977	-0.378071	0.0347588		1.02037	-0.038693	0.0314796		1.01999	-0.263497	0.0533563
1.0208	2.45033	0.616439		1.02088	0.08564	0.0148019		1.0206	-0.379661	0.034657		1.0212	-0.040244	0.0313672		1.02082	-0.263794	0.0533359
1.02163	2.45	0.616427		1.02171	0.08488	0.0147817		1.02143	-0.380844	0.0345812		1.02203	-0.04045	0.0313522		1.02165	-0.264922	0.0532581
1.02246	2.44975	0.616418		1.02254	0.083384	0.014742		1.02226	-0.380864	0.0345799		1.02286	-0.041229	0.0312958		1.02249	-0.26611	0.0531763
1.02329	2.44965	0.616414		1.02337	0.082626	0.0147219		1.02309	-0.382104	0.0345005		1.0237	-0.042117	0.0312314		1.02332	-0.266417	0.0531551
1.02412	2.45069	0.616453		1.0242	0.082642	0.0147223		1.02392	-0.381334	0.0345499		1.02453	-0.042043	0.0312368		1.02415	-0.268138	0.0530365
1.02496	2.45137	0.616478		1.02504	0.082541	0.0147196		1.02476	-0.381275	0.0345536		1.02536	-0.044325	0.0310713		1.02498	-0.268938	0.0529814
1.02579	2.45153	0.616484		1.02587	0.081173	0.0146833		1.02559	-0.380373	0.0346114		1.02619	-0.045073	0.0310171		1.02581	-0.26865	0.0530013
1.02662	2.45126	0.616474		1.0267	0.080366	0.0146619		1.02642	-0.380448	0.0346066		1.02702	-0.046487	0.0309146		1.02665	-0.269024	0.0529755
1.02745	2.45117	0.616471		1.02753	0.080396	0.0146627		1.02725	-0.3806	0.0345968		1.02786	-0.046004	0.0309496		1.02748	-0.269426	0.0529478
1.02828	2.45145	0.616481		1.02836	0.081905	0.0147028		1.02808	-0.381261	0.0345545		1.02869	-0.046684	0.0309003		1.02831	-0.270434	0.0528783
1.02912	2.45108	0.616467		1.0292	0.083443	0.0147436		1.02891	-0.381671	0.0345283		1.02952	-0.046438	0.0309182		1.02914	-0.27098	0.0528407
1.02995	2.45024	0.616436		1.03003	0.083852	0.0147545		1.02975	-0.382486	0.0344761		1.03035	-0.046486	0.0309147		1.02998	-0.270727	0.0528581
1.03078	2.45031	0.616439		1.03086	0.083514	0.0147455		1.03058	-0.384252	0.034363		1.03119	-0.046517	0.0309124		1.03081	-0.271051	0.0528358
1.03161	2.4525	0.61652		1.03169	0.082575	0.0147205		1.03141	-0.38562	0.0342754		1.03202	-0.047504	0.0308409		1.03164	-0.271333	0.0528164
1.03245	2.45219	0.616509		1.03252	0.082991	0.0147316		1.03224	-0.385767	0.034266		1.03285	-0.047475	0.030843		1.03247	-0.271057	0.0528354
1.03328	2.45197	0.6165		1.03336	0.083447	0.0147437		1.03307	-0.385983	0.0342522		1.03368	-0.04541	0.0309927		1.0333	-0.271622	0.0527965
1.03411	2.45238	0.616515		1.03419	0.08432	0.0147669		1.03391	-0.38674	0.0342037		1.03452	-0.044654	0.0310475		1.03414	-0.272382	0.0527441
1.03494	2.45166	0.616489		1.03502	0.085925	0.0148095		1.03474	-0.387313	0.034167		1.03535	-0.044163	0.0310831		1.03497	-0.271786	0.0527852
1.03577	2.45323	0.616547		1.03585	0.086353	0.0148209		1.03557	-0.38772	0.034141		1.03618	-0.04416	0.0310833		1.0358	-0.270737	0.0528575
1.0366	2.45414	0.61658		1.03668	0.086731	0.0148309		1.0364	-0.387321	0.0341665		1.03701	-0.045012	0.0310215		1.03663	-0.269881	0.0529164
1.03744	2.4543	0.616586		1.03752	0.086613	0.0148278		1.03723	-0.386753	0.0342029		1.03784	-0.044909	0.031029		1.03746	-0.270016	0.0529071
1.03827	2.45304	0.61654		1.03835	0.085726	0.0148042		1.03806	-0.387066	0.0341828		1.03868	-0.045741	0.0309687		1.03829	-0.270517	0.0528726
1.0391	2.45396	0.616574		1.03918	0.084158	0.0147626		1.03889	-0.38686	0.034196		1.03951	-0.046533	0.0309113		1.03913	-0.269509	0.0529421
1.03993	2.45453	0.616595		1.04001	0.084195	0.0147636		1.03973	-0.386326	0.0342302		1.04034	-0.047705	0.0308263		1.03996	-0.269179	0.0529648
1.04076	2.45298	0.616538		1.04084	0.085084	0.0147872		1.04056	-0.385582	0.0342779		1.04117	-0.048798	0.0307471		1.04079	-0.270115	0.0529003
1.0416	2.45331	0.61655		1.04168	0.085621	0.0148014		1.04139	-0.384847	0.0343249		1.04201	-0.04883	0.0307448		1.04162	-0.270942	0.0528433
1.04243	2.45324	0.616547		1.04251	0.08554	0.0147993		1.04222	-0.384217	0.0343653		1.04284	-0.04984	0.0306716		1.04245	-0.271119	0.0528311
1.04326	2.45316	0.616544		1.04334	0.085956	0.0148103		1.04305	-0.384357	0.0343563		1.04367	-0.049693	0.0306822		1.04329	-0.269557	0.0529388
1.04409	2.45364	0.616562		1.04417	0.086597	0.0148273		1.04389	-0.38529	0.0342966		1.0445	-0.049148	0.0307217		1.04412	-0.268041	0.0530432
1.04492	2.4539	0.616572		1.045	0.087153	0.0148421		1.04472	-0.386725	0.0342047		1.04533	-0.049144	0.030722		1.04495	-0.268199	0.0530323
1.04576	2.45513	0.616617		1.04584	0.088182	0.0148694		1.04555	-0.38662	0.0342114		1.04617	-0.048277	0.0307849		1.04578	-0.267636	0.0530711
1.04659	2.45562	0.616635		1.04667	0.090005	0.0149178		1.04638	-0.38692	0.0341922		1.047	-0.047816	0.0308183		1.04662	-0.267454	0.0530837
1.04742	2.45687	0.616682		1.0475	0.089724	0.0149104		1.04721	-0.386877	0.0341949		1.04783	-0.047483	0.0308424		1.04745	-0.267762	0.0530624
1.04825	2.45782	0.616717		1.04833	0.087139	0.0148417		1.04804	-0.386436	0.0342232		1.04866	-0.04795	0.0308086		1.04828	-0.267315	0.0530932
1.04908	2.45899	0.61676		1.04916	0.086036	0.0148124		1.04888	-0.386172	0.0342401		1.0495	-0.04831	0.0307825		1.04911	-0.267141	0.0531052
1.04992	2.45898	0.61676		1.05	0.085364	0.0147946		1.04971	-0.386984	0.0341881		1.05033	-0.048641	0.0307585		1.04994	-0.267834	0.0530575
1.05075	2.45978	0.616789		1.05083	0.085588	0.0148005		1.05054	-0.387596	0.0341489		1.05116	-0.049165	0.0307205		1.05077	-0.268048	0.0530427
1.05158	2.45975	0.616788		1.05166	0.08667	0.0148293		1.05137	-0.387271	0.0341697		1.05199	-0.048945	0.0307365		1.05161	-0.267756	0.0530629
1.05241	2.45751	0.616705		1.05249	0.08795	0.0148633		1.0522	-0.387467	0.0341572		1.05282	-0.049128	0.0307232		1.05244	-0.268004	0.0530458
1.05324	2.45765	0.61671		1.05332	0.088018	0.0148651		1.05304	-0.389397	0.0340336		1.05366	-0.049454	0.0306996		1.05327	-0.268741	0.052995
1.05408	2.45747	0.616704		1.05416	0.087117	0.0148412		1.05387	-0.390378	0.0339708		1.05449	-0.050685	0.0306103		1.0541	-0.268183	0.0530334
1.05491	2.45705	0.616688		1.05499	0.086052	0.0148129		1.0547	-0.389502	0.0340269		1.05532	-0.050744	0.030606		1.05493	-0.268161	0.053035
1.05574	2.45868	0.616749		1.05582	0.085297	0.0147928		1.05553	-0.388745	0.0340753		1.05615	-0.051185	0.0305741		1.05577	-0.26938	0.052951
1.05657	2.45861	0.616746		1.05665	0.085793	0.014806		1.05636	-0.388617	0.0340835		1.05699	-0.050027	0.030658		1.0566	-0.2701	0.0529013
1.0574	2.45818	0.61673		1.05749	0.08461	0.0147746		1.0572	-0.388367	0.0340995		1.05782	-0.049758	0.0306775		1.05743	-0.270985	0.0528404
1.05824	2.45744	0.616703		1.05832	0.08418	0.0147632		1.05803	-0.387805	0.0341355		1.05865	-0.050147	0.0306493		1.05826	-0.271701	0.052791
1.05907	2.45849	0.616742		1.05915	0.083611	0.0147481		1.05886	-0.388302	0.0341037		1.05948	-0.049912	0.0306664		1.05909	-0.271289	0.0528194
1.0599	2.45877	0.616752		1.05998	0.082776	0.0147259		1.05969	-0.388644	0.0340818		1.06031	-0.048393	0.0307765		1.05993	-0.271479	0.0528063
1.06073	2.45888	0.616756		1.06081	0.081031	0.0146795		1.06052	-0.388793	0.0340723		1.06115	-0.047526	0.0308393		1.06076	-0.271802	0.0527841
1.06156	2.45991	0.616794		1.06164	0.079076	0.0146276		1.06135	-0.388916	0.0340644		1.06198	-0.046556	0.0309096		1.06159	-0.271655	0.0527942
1.06239	2.45989	0.616793		1.06248	0.078336	0.014608		1.06218	-0.387935	0.0341272		1.06281	-0.046719	0.0308978		1.06242	-0.271851	0.0527807
1.06323	2.46056	0.616818		1.06331	0.078374	0.014609		1.06302	-0.388183	0.0341113		1.06364	-0.046064	0.0309453		1.06325	-0.271735	0.0527887
1.06406	2.46036	0.616811		1.06414	0.077577	0.0145878		1.06385	-0.389541	0.0340244		1.06448	-0.045975	0.0309517		1.06409	-0.272971	0.0527035
1.06489	2.46007	0.6168		1.06497	0.076942	0.014571		1.06468	-0.388934	0.0340632		1.06531	-0.04618	0.0309369		1.06492	-0.275298	0.0525432
1.06572	2.45954	0.616781		1.0658	0.076581	0.0145614		1.06551	-0.388084	0.0341177		1.06614	-0.046173	0.0309374		1.06575	-0.276365	0.0524696
1.06655	2.45897	0.616759		1.06664	0.075358	0.0145289		1.06634	-0.388297	0.034104		1.06697	-0.045655	0.0309749		1.06658	-0.276436	0.0524648
1.06739	2.45867	0.616748		1.06747	0.074258	0.0144997		1.06718	-0.388798	0.0340719		1.06781	-0.045752	0.0309679		1.06741	-0.276847	0.0524364
1.06822	2.45808	0.616727		1.0683	0.074262	0.0144998		1.06801	-0.389177	0.0340477		1.06864	-0.046106	0.0309422		1.06825	-0.277084	0.0524201
1.06905	2.45778	0.616715		1.06913	0.075154	0.0145235		1.06884	-0.38964	0.034018		1.06947	-0.046643	0.0309033		1.06908	-0.278079	0.0523515
1.06988	2.45777	0.616715		1.06997	0.075066	0.0145211		1.06967	-0.390444	0.0339666		1.0703	-0.045668	0.030974		1.06991	-0.279655	0.0522429
1.07071	2.45877	0.616752		1.0708	0.073382	0.0144764		1.0705	-0.390159	0.0339848		1.07113	-0.045322	0.0309991		1.07074	-0.280233	0.0522031
1.07155	2.45945	0.616777		1.07163	0.072517	0.0144535		1.07133	-0.390248	0.0339791		1.07197	-0.04626	0.0309311		1.07157	-0.28139	0.0521234
1.07238	2.46005	0.616799		1.07246	0.072231	0.0144459		1.07217	-0.390916	0.0339363		1.0728	-0.047208	0.0308624		1.07241	-0.282119	0.0520732
1.07321	2.461	0.616834		1.07329	0.071372	0.0144231		1.073	-0.391472	0.0339007		1.07363	-0.048054	0.030801		1.07324	-0.281729	0.0521
1.07404	2.462	0.616872		1.07412	0.070913	0.0144109		1.07383	-0.389607	0.0340201		1.07446	-0.048943	0.0307366		1.07407	-0.281879	0.0520897
1.07487	2.4628	0.616901		1.07496	0.070702	0.0144053		1.07466	-0.388219	0.034109		1.0753	-0.048651	0.0307578		1.0749	-0.282804	0.052026
1.07571	2.46339	0.616923		1.07579	0.070361	0.0143962		1.07549	-0.387794	0.0341362		1.07613	-0.049079	0.0307267		1.07573	-0.283276	0.0519934
1.07654	2.46288	0.616904		1.07662	0.069711	0.0143789		1.07633	-0.388611	0.0340839		1.07696	-0.049092	0.0307258		1.07656	-0.28352	0.0519766
1.07737	2.4629	0.616905		1.07745	0.06931	0.0143683		1.07716	-0.389182	0.0340474		1.07779	-0.049058	0.0307283		1.0774	-0.284227	0.0519279
1.0782	2.46354	0.616929		1.07828	0.069807	0.0143815		1.07799	-0.389815	0.0340068		1.07862	-0.049668	0.030684		1.07823	-0.284663	0.0518979
1.07903	2.46483	0.616977		1.07912	0.070125	0.0143899		1.07882	-0.3905	0.033963		1.07946	-0.049192	0.0307185		1.07906	-0.284808	0.0518879
1.07987	2.4655	0.617001		1.07995	0.070377	0.0143966		1.07965	-0.390285	0.0339767		1.08029	-0.048788	0.0307478		1.07989	-0.286333	0.0517828
1.0807	2.46494	0.61698		1.08078	0.070754	0.0144066		1.08048	-0.389984	0.033996		1.08112	-0.049733	0.0306793		1.08072	-0.287789	0.0516825
1.08153	2.46507	0.616985		1.08161	0.071106	0.014416		1.08132	-0.390455	0.0339658		1.08195	-0.049859	0.0306702		1.08156	-0.289829	0.0515419
1.08236	2.46598	0.617019		1.08245	0.071891	0.0144368		1.08215	-0.390696	0.0339504		1.08279	-0.04983	0.0306723		1.08239	-0.292133	0.0513831
1.08319	2.4669	0.617053		1.08328	0.072795	0.0144608		1.08298	-0.390934	0.0339352		1.08362	-0.048114	0.0307967		1.08322	-0.293319	0.0513014
1.08403	2.46754	0.617077		1.08411	0.072274	0.014447		1.08381	-0.390317	0.0339747		1.08445	-0.048368	0.0307783		1.08405	-0.294892	0.051193
1.08486	2.46911	0.617135		1.08494	0.072295	0.0144476		1.08464	-0.389253	0.0340428		1.08528	-0.048518	0.0307674		1.08489	-0.2968	0.0510615
1.08569	2.46997	0.617167		1.08577	0.072381	0.0144498		1.08547	-0.389498	0.0340271		1.08612	-0.04872	0.0307528		1.08572	-0.2974	0.0510202
1.08652	2.4697	0.617157		1.08661	0.071907	0.0144373		1.08631	-0.389562	0.034023		1.08695	-0.050285	0.0306393		1.08655	-0.295925	0.0511218
1.08735	2.46904	0.617133		1.08744	0.071576	0.0144285		1.08714	-0.38999	0.0339956		1.08778	-0.050736	0.0306066		1.08738	-0.296069	0.0511119
1.08818	2.46905	0.617133		1.08827	0.070878	0.0144099		1.08797	-0.391001	0.0339309		1.08861	-0.051107	0.0305797		1.08821	-0.296141	0.0511069
1.08902	2.46897	0.61713		1.0891	0.070668	0.0144044		1.0888	-0.390822	0.0339424		1.08944	-0.051158	0.030576		1.08905	-0.296291	0.0510966
1.08985	2.46879	0.617123		1.08993	0.070686	0.0144048		1.08963	-0.389699	0.0340143		1.09028	-0.050499	0.0306238		1.08988	-0.296476	0.0510839
1.09068	2.46843	0.61711		1.09076	0.070547	0.0144011		1.09047	-0.388571	0.0340865		1.09111	-0.052462	0.0304815		1.09071	-0.296148	0.0511065
1.09151	2.46792	0.617091		1.0916	0.070602	0.0144026		1.0913	-0.388333	0.0341017		1.09194	-0.053861	0.0303801		1.09154	-0.295334	0.0511626
1.09234	2.46717	0.617063		1.09243	0.069659	0.0143776		1.09213	-0.387588	0.0341494		1.09277	-0.052469	0.030481		1.09237	-0.295508	0.0511506
1.09318	2.46684	0.617051		1.09326	0.068763	0.0143538		1.09296	-0.386586	0.0342136		1.09361	-0.051443	0.0305554		1.0932	-0.296534	0.0510799
1.09401	2.46708	0.61706		1.09409	0.068633	0.0143503		1.09379	-0.385929	0.0342556		1.09444	-0.051253	0.0305692		1.09404	-0.297513	0.0510124
1.09484	2.46591	0.617016		1.09492	0.068111	0.0143365		1.09462	-0.385638	0.0342743		1.09527	-0.050801	0.0306019		1.09487	-0.297116	0.0510398
1.09567	2.46567	0.617008		1.09576	0.068016	0.0143339		1.09546	-0.385555	0.0342796		1.0961	-0.051842	0.0305265		1.0957	-0.296063	0.0511123
1.09651	2.46549	0.617001		1.09659	0.068209	0.0143391		1.09629	-0.385382	0.0342907		1.09693	-0.052116	0.0305066		1.09653	-0.294957	0.0511885
1.09734	2.46515	0.616988		1.09742	0.069147	0.014364		1.09712	-0.385927	0.0342558		1.09777	-0.053183	0.0304293		1.09736	-0.295297	0.0511651
1.09817	2.46425	0.616955		1.09825	0.069558	0.0143749		1.09795	-0.386005	0.0342508		1.0986	-0.054897	0.030305		1.0982	-0.295651	0.0511407
1.099	2.46385	0.61694		1.09909	0.069041	0.0143612		1.09878	-0.385808	0.0342634		1.09943	-0.053193	0.0304285		1.09903	-0.295779	0.0511319
1.09983	2.46335	0.616922		1.09992	0.069034	0.014361		1.09962	-0.385419	0.0342883		1.10026	-0.053265	0.0304233		1.09986	-0.296136	0.0511073
1.10066	2.46279	0.616901		1.10075	0.069276	0.0143674		1.10045	-0.38529	0.0342966		1.1011	-0.052953	0.0304459		1.10069	-0.295934	0.0511212
1.1015	2.46322	0.616917		1.10158	0.068948	0.0143587		1.10128	-0.384745	0.0343315		1.10193	-0.052959	0.0304455		1.10152	-0.295447	0.0511548
1.10233	2.46313	0.616913		1.10241	0.068753	0.0143535		1.10211	-0.384863	0.0343239		1.10276	-0.053186	0.030429		1.10236	-0.295978	0.0511182
1.10316	2.46254	0.616892		1.10325	0.069024	0.0143607		1.10294	-0.384926	0.0343199		1.10359	-0.053483	0.0304075		1.10319	-0.294573	0.051215
1.10399	2.46207	0.616874		1.10408	0.069156	0.0143642		1.10377	-0.386056	0.0342475		1.10443	-0.054357	0.0303442		1.10402	-0.294264	0.0512363
1.10482	2.46197	0.616871		1.10491	0.069716	0.0143791		1.10461	-0.386646	0.0342097		1.10526	-0.055152	0.0302865		1.10485	-0.294106	0.0512472
1.10566	2.46166	0.616859		1.10574	0.070371	0.0143965		1.10544	-0.386959	0.0341897		1.10609	-0.055793	0.0302401		1.10568	-0.292974	0.0513252
1.10649	2.46212	0.616876		1.10657	0.070333	0.0143955		1.10627	-0.387613	0.0341478		1.10692	-0.055055	0.0302936		1.10652	-0.292945	0.0513272
1.10732	2.46257	0.616893		1.1074	0.071138	0.0144168		1.1071	-0.38838	0.0340987		1.10776	-0.054418	0.0303397		1.10735	-0.294093	0.0512481
1.10815	2.46246	0.616889		1.10824	0.071607	0.0144293		1.10793	-0.38816	0.0341128		1.10859	-0.054815	0.030311		1.10818	-0.295145	0.0511756
1.10898	2.46208	0.616875		1.10907	0.071001	0.0144132		1.10877	-0.386943	0.0341907		1.10942	-0.05585	0.0302359		1.10901	-0.296904	0.0510544
1.10982	2.46256	0.616892		1.1099	0.070522	0.0144005		1.1096	-0.387304	0.0341676		1.11025	-0.055764	0.0302422		1.10984	-0.297607	0.0510059
1.11065	2.46328	0.616919		1.11073	0.070068	0.0143884		1.11043	-0.387912	0.0341287		1.11108	-0.05529	0.0302765		1.11068	-0.297744	0.0509965
1.11148	2.46356	0.616929		1.11156	0.068956	0.0143589		1.11126	-0.389852	0.0340045		1.11192	-0.054415	0.0303399		1.11151	-0.297244	0.0510309
1.11231	2.46455	0.616966		1.1124	0.067497	0.0143202		1.11209	-0.390595	0.0339569		1.11275	-0.053462	0.030409		1.11234	-0.298188	0.0509659
1.11314	2.46569	0.617008		1.11323	0.068066	0.0143353		1.11292	-0.390648	0.0339535		1.11358	-0.054253	0.0303517		1.11317	-0.298943	0.0509139
1.11397	2.46544	0.616999		1.11406	0.067746	0.0143268		1.11376	-0.390962	0.0339334		1.11441	-0.054801	0.030312		1.114	-0.299222	0.0508946
1.11481	2.46593	0.617017		1.11489	0.067278	0.0143143		1.11459	-0.390131	0.0339866		1.11525	-0.054417	0.0303398		1.11484	-0.299217	0.050895
1.11564	2.46647	0.617037		1.11573	0.066665	0.0142981		1.11542	-0.390103	0.0339884		1.11608	-0.05495	0.0303012		1.11567	-0.300114	0.0508332
1.11647	2.46585	0.617014		1.11656	0.06648	0.0142932		1.11625	-0.390361	0.0339719		1.11691	-0.054432	0.0303387		1.1165	-0.302057	0.0506993
1.1173	2.46584	0.617014		1.11739	0.066481	0.0142932		1.11708	-0.390998	0.0339311		1.11774	-0.054499	0.0303339		1.11733	-0.304344	0.0505417
1.11814	2.46725	0.617066		1.11822	0.065654	0.0142712		1.11791	-0.39044	0.0339668		1.11857	-0.054472	0.0303358		1.11816	-0.305171	0.0504847
1.11897	2.4684	0.617109		1.11905	0.063622	0.0142173		1.11875	-0.390199	0.0339822		1.11941	-0.054092	0.0303634		1.119	-0.306314	0.050406
1.1198	2.46859	0.617116		1.11989	0.062137	0.0141778		1.11958	-0.390499	0.033963		1.12024	-0.057422	0.030122		1.11983	-0.308518	0.0502541
1.12063	2.46884	0.617125		1.12072	0.061556	0.0141624		1.12041	-0.391873	0.0338751		1.12107	-0.058836	0.0300195		1.12066	-0.310277	0.0501329
1.12146	2.46983	0.617162		1.12155	0.0614	0.0141583		1.12124	-0.39181	0.0338791		1.1219	-0.061425	0.0298318		1.12149	-0.310569	0.0501128
1.1223	2.47044	0.617184		1.12238	0.062262	0.0141811		1.12207	-0.393035	0.0338007		1.12274	-0.062894	0.0297253		1.12232	-0.310798	0.050097
1.12313	2.47045	0.617185		1.12321	0.062028	0.0141749		1.12291	-0.391696	0.0338864		1.12357	-0.062763	0.0297348		1.12315	-0.311377	0.0500571
1.12396	2.47077	0.617197		1.12404	0.060327	0.0141298		1.12374	-0.390758	0.0339464		1.1244	-0.061519	0.029825		1.12399	-0.312996	0.0499455
1.12479	2.47139	0.617219		1.12488	0.058227	0.014074		1.12457	-0.390626	0.0339549		1.12523	-0.063002	0.0297175		1.12482	-0.314553	0.0498382
1.12562	2.47164	0.617228		1.12571	0.056595	0.0140307		1.1254	-0.3914	0.0339053		1.12607	-0.063052	0.0297139		1.12565	-0.315045	0.0498043
1.12645	2.47095	0.617203		1.12654	0.055892	0.014012		1.12623	-0.392721	0.0338208		1.1269	-0.062374	0.029763		1.12648	-0.315313	0.0497859
1.12729	2.47043	0.617184		1.12737	0.055322	0.0139969		1.12706	-0.391278	0.0339132		1.12773	-0.063747	0.0296635		1.12732	-0.315131	0.0497984
1.12812	2.47027	0.617178		1.1282	0.054259	0.0139686		1.1279	-0.390608	0.0339561		1.12856	-0.064726	0.0295925		1.12815	-0.315488	0.0497738
1.12895	2.47067	0.617193		1.12904	0.053242	0.0139416		1.12873	-0.390453	0.033966		1.12939	-0.064941	0.0295769		1.12898	-0.316323	0.0497163
1.12978	2.47156	0.617226		1.12987	0.054064	0.0139635		1.12956	-0.391831	0.0338777		1.13023	-0.064025	0.0296433		1.12981	-0.317275	0.0496507
1.13061	2.47186	0.617237		1.1307	0.054774	0.0139823		1.13039	-0.391872	0.0338751		1.13106	-0.064142	0.0296349		1.13064	-0.317908	0.0496071
1.13145	2.47186	0.617237		1.13153	0.054538	0.013976		1.13122	-0.391694	0.0338865		1.13189	-0.064847	0.0295838		1.13148	-0.318675	0.0495542
1.13228	2.47264	0.617266		1.13237	0.055431	0.0139998		1.13206	-0.390909	0.0339368		1.13272	-0.065519	0.029535		1.13231	-0.320284	0.0494433
1.13311	2.47278	0.617271		1.1332	0.05734	0.0140504		1.13289	-0.391913	0.0338725		1.13356	-0.067295	0.0294063		1.13314	-0.321074	0.0493889
1.13394	2.4717	0.617231		1.13403	0.057814	0.014063		1.13372	-0.392176	0.0338557		1.13439	-0.06678	0.0294436		1.13397	-0.321652	0.0493491
1.13477	2.47165	0.617229		1.13486	0.05678	0.0140356		1.13455	-0.391817	0.0338786		1.13522	-0.067803	0.0293695		1.1348	-0.322886	0.049264
1.13561	2.47146	0.617222		1.13569	0.056068	0.0140167		1.13538	-0.393362	0.0337797		1.13605	-0.067675	0.0293788		1.13563	-0.323997	0.0491875
1.13644	2.47154	0.617225		1.13653	0.056164	0.0140192		1.13621	-0.39392	0.033744		1.13688	-0.06832	0.029332		1.13647	-0.324687	0.0491399
1.13727	2.47303	0.61728		1.13736	0.056552	0.0140295		1.13705	-0.394871	0.0336831		1.13772	-0.068105	0.0293476		1.1373	-0.324207	0.049173
1.1381	2.47508	0.617356		1.13819	0.055649	0.0140055		1.13788	-0.395163	0.0336644		1.13855	-0.068446	0.0293229		1.13813	-0.322956	0.0492592
1.13893	2.47596	0.617389		1.13902	0.055022	0.0139889		1.13871	-0.395228	0.0336602		1.13938	-0.067559	0.0293872		1.13896	-0.323216	0.0492413
1.13977	2.4762	0.617398		1.13985	0.055025	0.013989		1.13954	-0.396727	0.0335643		1.14021	-0.068692	0.029305		1.13979	-0.322559	0.0492866
1.1406	2.47745	0.617444		1.14069	0.055066	0.0139901		1.14037	-0.396448	0.0335821		1.14105	-0.066471	0.029466		1.14063	-0.321549	0.0493562
1.14143	2.47834	0.617477		1.14152	0.05548	0.0140011		1.14121	-0.396882	0.0335543		1.14188	-0.066005	0.0294998		1.14146	-0.320664	0.0494172
1.14226	2.47814	0.617469		1.14235	0.055872	0.0140115		1.14204	-0.397204	0.0335337		1.14271	-0.063995	0.0296455		1.14229	-0.320921	0.0493994
1.14309	2.47692	0.617424		1.14318	0.055461	0.0140006		1.14287	-0.397442	0.0335185		1.14354	-0.061638	0.0298164		1.14312	-0.321238	0.0493776
1.14393	2.47592	0.617387		1.14401	0.055421	0.0139995		1.1437	-0.398911	0.0334244		1.14437	-0.061515	0.0298253		1.14396	-0.320892	0.0494014
1.14476	2.47598	0.617389		1.14485	0.056618	0.0140313		1.14453	-0.400161	0.0333444		1.14521	-0.062093	0.0297834		1.14479	-0.320091	0.0494566
1.14559	2.476	0.61739		1.14568	0.057639	0.0140584		1.14536	-0.40033	0.0333336		1.14604	-0.061791	0.0298053		1.14562	-0.319088	0.0495258
1.14642	2.47644	0.617406		1.14651	0.058404	0.0140787		1.1462	-0.400287	0.0333363		1.14687	-0.061761	0.0298075		1.14645	-0.319377	0.0495058
1.14725	2.47717	0.617433		1.14734	0.058839	0.0140903		1.14703	-0.399363	0.0333955		1.1477	-0.06181	0.0298039		1.14728	-0.320106	0.0494556
1.14809	2.47716	0.617433		1.14817	0.058939	0.0140929		1.14786	-0.401477	0.0332601		1.14854	-0.061728	0.0298098		1.14811	-0.321486	0.0493605
1.14892	2.47836	0.617477		1.14901	0.05918	0.0140993		1.14869	-0.401771	0.0332413		1.14937	-0.06099	0.0298633		1.14895	-0.322266	0.0493068
1.14975	2.48026	0.617548		1.14984	0.059414	0.0141055		1.14952	-0.401903	0.0332329		1.1502	-0.061186	0.0298491		1.14978	-0.323041	0.0492534
1.15058	2.48071	0.617564		1.15067	0.05909	0.0140969		1.15035	-0.402377	0.0332025		1.15103	-0.062403	0.0297609		1.15061	-0.322627	0.0492819
1.15141	2.4807	0.617564		1.1515	0.058684	0.0140861		1.15119	-0.402538	0.0331922		1.15186	-0.062084	0.029784		1.15144	-0.322052	0.0493215
1.15224	2.48031	0.61755		1.15233	0.058405	0.0140787		1.15202	-0.402818	0.0331743		1.1527	-0.062025	0.0297883		1.15227	-0.32348	0.0492231
1.15308	2.47904	0.617502		1.15317	0.057082	0.0140436		1.15285	-0.402921	0.0331677		1.15353	-0.062134	0.0297804		1.15311	-0.324548	0.0491495
1.15391	2.47876	0.617492		1.154	0.055711	0.0140072		1.15368	-0.402172	0.0332156		1.15436	-0.061268	0.0298432		1.15394	-0.325294	0.0490981
1.15474	2.48039	0.617553		1.15483	0.055808	0.0140098		1.15451	-0.403176	0.0331513		1.15519	-0.061904	0.0297971		1.15477	-0.325281	0.049099
1.15557	2.48196	0.617611		1.15566	0.056526	0.0140288		1.15535	-0.403453	0.0331336		1.15603	-0.06042	0.0299047		1.1556	-0.325287	0.0490986
1.1564	2.48223	0.617621		1.15649	0.056213	0.0140205		1.15618	-0.403677	0.0331193		1.15686	-0.061638	0.0298164		1.15643	-0.32605	0.049046
1.15724	2.48168	0.617601		1.15733	0.05433	0.0139705		1.15701	-0.403837	0.033109		1.15769	-0.060597	0.0298918		1.15727	-0.328317	0.0488898
1.15807	2.48067	0.617563		1.15816	0.05341	0.0139461		1.15784	-0.403859	0.0331076		1.15852	-0.060592	0.0298922		1.1581	-0.329924	0.0487791
1.1589	2.47889	0.617497		1.15899	0.054617	0.0139781		1.15867	-0.404332	0.0330773		1.15936	-0.061001	0.0298625		1.15893	-0.332243	0.0486193
1.15973	2.4779	0.617461		1.15982	0.055329	0.013997		1.1595	-0.403378	0.0331384		1.16019	-0.061069	0.0298576		1.15976	-0.333246	0.0485502
1.16056	2.4776	0.617449		1.16065	0.056231	0.014021		1.16034	-0.40338	0.0331383		1.16102	-0.061501	0.0298263		1.16059	-0.334434	0.0484683
1.1614	2.47699	0.617427		1.16149	0.056567	0.0140299		1.16117	-0.404635	0.0330579		1.16185	-0.06039	0.0299068		1.16143	-0.334991	0.0484299
1.16223	2.47697	0.617426		1.16232	0.056486	0.0140278		1.162	-0.40363	0.0331223		1.16268	-0.060513	0.0298979		1.16226	-0.33598	0.0483618
1.16306	2.47751	0.617446		1.16315	0.055795	0.0140094		1.16283	-0.403431	0.033135		1.16352	-0.061664	0.0298145		1.16309	-0.336303	0.0483395
1.16389	2.47898	0.6175		1.16398	0.055248	0.0139949		1.16366	-0.403102	0.0331561		1.16435	-0.062656	0.0297426		1.16392	-0.337146	0.0482814
1.16472	2.47989	0.617534		1.16481	0.055524	0.0140022		1.1645	-0.403747	0.0331148		1.16518	-0.063004	0.0297174		1.16475	-0.336981	0.0482928
1.16556	2.4808	0.617568		1.16565	0.054963	0.0139873		1.16533	-0.402868	0.0331711		1.16601	-0.062941	0.0297219		1.16559	-0.336432	0.0483306
1.16639	2.48185	0.617607		1.16648	0.054803	0.0139831		1.16616	-0.401018	0.0332895		1.16685	-0.062519	0.0297525		1.16642	-0.337928	0.0482276
1.16722	2.48191	0.617609		1.16731	0.054247	0.0139683		1.16699	-0.400869	0.0332991		1.16768	-0.061853	0.0298008		1.16725	-0.338989	0.0481544
1.16805	2.48143	0.617591		1.16814	0.05376	0.0139554		1.16782	-0.401853	0.0332361		1.16851	-0.062146	0.0297795		1.16808	-0.338023	0.048221
1.16888	2.48188	0.617608		1.16897	0.052755	0.0139287		1.16865	-0.40023	0.03334		1.16934	-0.062489	0.0297547		1.16891	-0.337443	0.048261
1.16972	2.4821	0.617616		1.16981	0.05115	0.0138861		1.16949	-0.398883	0.0334262		1.17017	-0.061767	0.029807		1.16975	-0.338096	0.048216
1.17055	2.48072	0.617565		1.17064	0.050314	0.0138639		1.17032	-0.399754	0.0333705		1.17101	-0.061385	0.0298347		1.17058	-0.33839	0.0481957
1.17138	2.48052	0.617557		1.17147	0.050394	0.013866		1.17115	-0.398672	0.0334397		1.17184	-0.061078	0.029857		1.17141	-0.338725	0.0481726
1.17221	2.48008	0.617541		1.1723	0.050047	0.0138568		1.17198	-0.398617	0.0334433		1.17267	-0.060696	0.0298847		1.17224	-0.339815	0.0480975
1.17304	2.47967	0.617526		1.17313	0.049089	0.0138313		1.17281	-0.398807	0.0334311		1.1735	-0.061314	0.0298399		1.17307	-0.340475	0.048052
1.17388	2.48022	0.617546		1.17397	0.049299	0.0138369		1.17364	-0.399516	0.0333857		1.17434	-0.060896	0.0298702		1.1739	-0.339997	0.048085
1.17471	2.4806	0.61756		1.1748	0.049706	0.0138477		1.17448	-0.39966	0.0333765		1.17517	-0.060247	0.0299172		1.17474	-0.339895	0.048092
1.17554	2.48005	0.61754		1.17563	0.049188	0.013834		1.17531	-0.398118	0.0334752		1.176	-0.059802	0.0299495		1.17557	-0.341079	0.0480104
1.17637	2.47873	0.617491		1.17646	0.048236	0.0138087		1.17614	-0.398893	0.0334256		1.17683	-0.060465	0.0299014		1.1764	-0.341366	0.0479907
1.1772	2.47912	0.617506		1.17729	0.047971	0.0138017		1.17697	-0.398355	0.03346		1.17767	-0.059924	0.0299406		1.17723	-0.340883	0.0480239
1.17803	2.4796	0.617524		1.17813	0.048944	0.0138275		1.1778	-0.399028	0.0334169		1.1785	-0.060649	0.0298881		1.17806	-0.338865	0.048163
1.17887	2.48008	0.617541		1.17896	0.048911	0.0138266		1.17864	-0.397872	0.033491		1.17933	-0.05983	0.0299474		1.1789	-0.337901	0.0482294
1.1797	2.48039	0.617553		1.17979	0.047369	0.0137857		1.17947	-0.397847	0.0334926		1.18016	-0.059421	0.0299771		1.17973	-0.337453	0.0482603
1.18053	2.48108	0.617578		1.18062	0.04658	0.0137647		1.1803	-0.399081	0.0334135		1.181	-0.060276	0.0299151		1.18056	-0.336868	0.0483006
1.18136	2.48141	0.61759		1.18145	0.046314	0.0137577		1.18113	-0.399428	0.0333913		1.18183	-0.059603	0.0299639		1.18139	-0.336989	0.0482923
1.1822	2.48183	0.617606		1.18229	0.04584	0.0137451		1.18196	-0.398069	0.0334783		1.18266	-0.060642	0.0298886		1.18223	-0.337523	0.0482555
1.18303	2.48037	0.617552		1.18312	0.045073	0.0137247		1.18279	-0.397562	0.0335108		1.18349	-0.060101	0.0299278		1.18306	-0.33732	0.0482694
1.18386	2.47872	0.617491		1.18395	0.044169	0.0137007		1.18363	-0.397825	0.033494		1.18432	-0.06009	0.0299286		1.18389	-0.336468	0.0483282
1.18469	2.47768	0.617452		1.18478	0.044096	0.0136988		1.18446	-0.398033	0.0334806		1.18516	-0.060707	0.0298839		1.18472	-0.336433	0.0483306
1.18552	2.47755	0.617447		1.18561	0.043396	0.0136802		1.18529	-0.397472	0.0335166		1.18599	-0.061144	0.0298522		1.18555	-0.33832	0.0482005
1.18636	2.47744	0.617443		1.18645	0.042782	0.0136639		1.18612	-0.399243	0.0334032		1.18682	-0.061649	0.0298156		1.18639	-0.340755	0.0480328
1.18719	2.47602	0.617391		1.18728	0.042708	0.0136619		1.18695	-0.401871	0.0332349		1.18765	-0.062161	0.0297785		1.18722	-0.340518	0.0480491
1.18802	2.47584	0.617384		1.18811	0.042171	0.0136476		1.18778	-0.40237	0.033203		1.18849	-0.062326	0.0297665		1.18805	-0.340889	0.0480235
1.18885	2.47717	0.617434		1.18894	0.041591	0.0136322		1.18862	-0.402351	0.0332042		1.18932	-0.061243	0.029845		1.18888	-0.342813	0.0478909
1.18968	2.47808	0.617467		1.18977	0.041928	0.0136412		1.18945	-0.403812	0.0331106		1.19015	-0.060444	0.0299029		1.18971	-0.343381	0.0478518
1.19051	2.47645	0.617407		1.19061	0.043703	0.0136883		1.19028	-0.405722	0.0329883		1.19098	-0.061692	0.0298125		1.19054	-0.342588	0.0479064
1.19135	2.47604	0.617391		1.19144	0.044577	0.0137115		1.19111	-0.407135	0.0328979		1.19181	-0.062136	0.0297803		1.19138	-0.340862	0.0480254
1.19218	2.47732	0.617439		1.19227	0.043741	0.0136893		1.19194	-0.407723	0.0328602		1.19265	-0.062565	0.0297492		1.19221	-0.340577	0.048045
1.19301	2.47834	0.617477		1.1931	0.042979	0.0136691		1.19277	-0.408715	0.0327967		1.19348	-0.064078	0.0296395		1.19304	-0.340194	0.0480714
1.19384	2.47961	0.617524		1.19393	0.043372	0.0136795		1.19361	-0.410074	0.0327097		1.19431	-0.064398	0.0296163		1.19387	-0.339383	0.0481273
1.19467	2.4799	0.617535		1.19477	0.04392	0.0136941		1.19444	-0.409805	0.0327269		1.19514	-0.063974	0.029647		1.1947	-0.33874	0.0481716
1.19551	2.47993	0.617536		1.1956	0.04415	0.0137002		1.19527	-0.410802	0.0326631		1.19598	-0.065934	0.029505		1.19554	-0.339415	0.0481251
1.19634	2.47979	0.61753		1.19643	0.043689	0.013688		1.1961	-0.411212	0.0326368		1.19681	-0.066455	0.0294672		1.19637	-0.338812	0.0481666
1.19717	2.47897	0.6175		1.19726	0.043995	0.0136961		1.19693	-0.411534	0.0326162		1.19764	-0.06723	0.029411		1.1972	-0.338773	0.0481693
1.198	2.47875	0.617492		1.19809	0.044094	0.0136987		1.19777	-0.412516	0.0325533		1.19847	-0.065904	0.0295071		1.19803	-0.338568	0.0481835
1.19883	2.47888	0.617497		1.19893	0.042632	0.0136599		1.1986	-0.412935	0.0325265		1.19931	-0.066005	0.0294998		1.19886	-0.338732	0.0481722
1.19967	2.47926	0.617511		1.19976	0.042579	0.0136585		1.19943	-0.413515	0.0324894		1.20014	-0.066952	0.0294312		1.1997	-0.338961	0.0481564
1.2005	2.47993	0.617536		1.20059	0.042822	0.0136649		1.20026	-0.4157	0.0323495		1.20097	-0.067757	0.0293728		1.20053	-0.33906	0.0481495
1.20133	2.4798	0.617531		1.20142	0.04215	0.0136471		1.20109	-0.417056	0.0322626		1.2018	-0.067972	0.0293572		1.20136	-0.338949	0.0481572
1.20216	2.47906	0.617503		1.20225	0.042314	0.0136514		1.20192	-0.416662	0.0322879		1.20263	-0.067401	0.0293986		1.20219	-0.338512	0.0481873
1.20299	2.47893	0.617499		1.20309	0.042974	0.013669		1.20276	-0.41757	0.0322297		1.20347	-0.067807	0.0293692		1.20302	-0.33815	0.0482123
1.20383	2.479	0.617501		1.20392	0.043507	0.0136831		1.20359	-0.418871	0.0321464		1.2043	-0.069777	0.0292264		1.20386	-0.337108	0.0482841
1.20466	2.47865	0.617488		1.20475	0.043487	0.0136826		1.20442	-0.420731	0.0320273		1.20513	-0.068883	0.0292912		1.20469	-0.338706	0.0481739
1.20549	2.47887	0.617496		1.20558	0.042972	0.0136689		1.20525	-0.420432	0.0320465		1.20596	-0.067104	0.0294202		1.20552	-0.338794	0.0481679
1.20632	2.47873	0.617491		1.20641	0.043136	0.0136733		1.20608	-0.420123	0.0320663		1.2068	-0.066881	0.0294363		1.20635	-0.338366	0.0481974
1.20715	2.47854	0.617484		1.20725	0.043918	0.013694		1.20691	-0.419276	0.0321205		1.20763	-0.068296	0.0293338		1.20718	-0.338332	0.0481997
1.20799	2.47872	0.617491		1.20808	0.043947	0.0136948		1.20775	-0.41968	0.0320946		1.20846	-0.067334	0.0294035		1.20802	-0.338191	0.0482094
1.20882	2.47846	0.617481		1.20891	0.043821	0.0136915		1.20858	-0.41966	0.0320959		1.20929	-0.067571	0.0293863		1.20885	-0.337298	0.048271
1.20965	2.477	0.617427		1.20974	0.043901	0.0136936		1.20941	-0.419385	0.0321135		1.21012	-0.069537	0.0292438		1.20968	-0.335991	0.048361
1.21048	2.47632	0.617402		1.21057	0.04358	0.0136851		1.21024	-0.418931	0.0321426		1.21096	-0.070424	0.0291795		1.21051	-0.335413	0.0484009
1.21131	2.47682	0.617421		1.21141	0.043656	0.0136871		1.21107	-0.417978	0.0322036		1.21179	-0.070834	0.0291498		1.21134	-0.336243	0.0483437
1.21215	2.4765	0.617408		1.21224	0.043777	0.0136903		1.21191	-0.416869	0.0322746		1.21262	-0.070795	0.0291526		1.21218	-0.337423	0.0482623
1.21298	2.47553	0.617373		1.21307	0.043853	0.0136923		1.21274	-0.416843	0.0322763		1.21345	-0.067794	0.0293701		1.21301	-0.338203	0.0482086
1.21381	2.47495	0.617351		1.2139	0.043655	0.0136871		1.21357	-0.416214	0.0323165		1.21429	-0.067475	0.0293933		1.21384	-0.338929	0.0481586
1.21464	2.47446	0.617333		1.21473	0.042913	0.0136674		1.2144	-0.415589	0.0323566		1.21512	-0.068681	0.0293058		1.21467	-0.339337	0.0481305
1.21547	2.47461	0.617339		1.21557	0.04178	0.0136373		1.21523	-0.415887	0.0323375		1.21595	-0.068623	0.02931		1.2155	-0.340485	0.0480514
1.2163	2.47452	0.617335		1.2164	0.041008	0.0136168		1.21606	-0.415986	0.0323311		1.21678	-0.06765	0.0293806		1.21634	-0.340398	0.0480574
1.21714	2.47477	0.617344		1.21723	0.04079	0.013611		1.2169	-0.416408	0.0323041		1.21761	-0.067682	0.0293783		1.21717	-0.340531	0.0480482
1.21797	2.47537	0.617367		1.21806	0.040263	0.013597		1.21773	-0.416478	0.0322996		1.21845	-0.066762	0.0294449		1.218	-0.339794	0.048099
1.2188	2.47555	0.617374		1.21889	0.039723	0.0135826		1.21856	-0.416997	0.0322664		1.21928	-0.069678	0.0292336		1.21883	-0.340298	0.0480642
1.21963	2.4752	0.61736		1.21973	0.040481	0.0136028		1.21939	-0.416936	0.0322703		1.22011	-0.069726	0.0292301		1.21966	-0.341776	0.0479624
1.22046	2.47424	0.617325		1.22056	0.040814	0.0136116		1.22022	-0.416691	0.032286		1.22094	-0.072235	0.0290482		1.2205	-0.342691	0.0478993
1.2213	2.47417	0.617322		1.22139	0.04071	0.0136089		1.22106	-0.415186	0.0323824		1.22178	-0.071613	0.0290933		1.22133	-0.343827	0.0478211
1.22213	2.47486	0.617348		1.22222	0.040613	0.0136063		1.22189	-0.414767	0.0324092		1.22261	-0.071338	0.0291132		1.22216	-0.344412	0.0477808
1.22296	2.47458	0.617337		1.22306	0.039724	0.0135827		1.22272	-0.413631	0.0324819		1.22344	-0.071692	0.0290876		1.22299	-0.346265	0.0476531
1.22379	2.47405	0.617318		1.22389	0.038511	0.0135505		1.22355	-0.412963	0.0325247		1.22427	-0.07194	0.0290696		1.22382	-0.347401	0.0475748
1.22462	2.47489	0.617349		1.22472	0.037709	0.0135292		1.22438	-0.413048	0.0325193		1.22511	-0.069959	0.0292132		1.22466	-0.349777	0.0474111
1.22546	2.47516	0.617359		1.22555	0.037216	0.0135161		1.22521	-0.411997	0.0325866		1.22594	-0.069619	0.0292379		1.22549	-0.350122	0.0473873
1.22629	2.47503	0.617354		1.22638	0.037518	0.0135241		1.22605	-0.411667	0.0326077		1.22677	-0.070773	0.0291542		1.22632	-0.35078	0.047342
1.22712	2.47521	0.617361		1.22721	0.037744	0.0135301		1.22688	-0.412746	0.0325386		1.2276	-0.07141	0.029108		1.22715	-0.350904	0.0473334
1.22795	2.47469	0.617341		1.22805	0.036818	0.0135055		1.22771	-0.41307	0.0325178		1.22843	-0.070686	0.0291605		1.22798	-0.350359	0.047371
1.22878	2.47475	0.617344		1.22888	0.036064	0.0134855		1.22854	-0.412009	0.0325858		1.22927	-0.072167	0.0290532		1.22881	-0.350944	0.0473307
1.22962	2.47432	0.617328		1.22971	0.035357	0.0134667		1.22937	-0.411782	0.0326003		1.2301	-0.073378	0.0289654		1.22965	-0.351863	0.0472673
1.23045	2.47391	0.617313		1.23054	0.034862	0.0134536		1.2302	-0.412693	0.032542		1.23093	-0.073054	0.0289889		1.23048	-0.352804	0.0472025
1.23128	2.47437	0.61733		1.23138	0.034652	0.013448		1.23104	-0.413211	0.0325088		1.23176	-0.073331	0.0289688		1.23131	-0.352966	0.0471913
1.23211	2.47456	0.617337		1.23221	0.032603	0.0133936		1.23187	-0.41386	0.0324673		1.2326	-0.073796	0.0289351		1.23214	-0.353027	0.0471871
1.23294	2.4743	0.617327		1.23304	0.031775	0.0133716		1.2327	-0.413041	0.0325197		1.23343	-0.073238	0.0289755		1.23297	-0.353304	0.047168
1.23378	2.47405	0.617318		1.23387	0.031719	0.0133701		1.23353	-0.413111	0.0325152		1.23426	-0.074978	0.0288494		1.23381	-0.352851	0.0471993
1.23461	2.47329	0.61729		1.2347	0.032133	0.0133811		1.23436	-0.41323	0.0325076		1.23509	-0.076314	0.0287525		1.23464	-0.353046	0.0471858
1.23544	2.47448	0.617334		1.23554	0.0334	0.0134147		1.2352	-0.41314	0.0325134		1.23592	-0.076922	0.0287085		1.23547	-0.352956	0.047192
1.23627	2.4738	0.617309		1.23637	0.034031	0.0134315		1.23603	-0.412557	0.0325507		1.23676	-0.077521	0.0286651		1.2363	-0.352837	0.0472002
1.2371	2.47323	0.617288		1.2372	0.034772	0.0134512		1.23686	-0.412427	0.032559		1.23759	-0.07821	0.0286151		1.23714	-0.353145	0.047179
1.23794	2.4743	0.617327		1.23803	0.035933	0.013482		1.23769	-0.413707	0.0324771		1.23842	-0.078269	0.0286108		1.23797	-0.3546	0.0470787
1.23877	2.47474	0.617343		1.23886	0.036805	0.0135052		1.23852	-0.413658	0.0324802		1.23925	-0.078779	0.0285739		1.2388	-0.355967	0.0469845
1.2396	2.47384	0.61731		1.23969	0.036772	0.0135043		1.23935	-0.41313	0.032514		1.24009	-0.077372	0.0286759		1.23963	-0.355364	0.0470261
1.24043	2.4727	0.617268		1.24053	0.03694	0.0135087		1.24019	-0.412952	0.0325254		1.24092	-0.07852	0.0285926		1.24046	-0.353984	0.0471212
1.24126	2.47321	0.617287		1.24136	0.035946	0.0134823		1.24102	-0.413234	0.0325073		1.24175	-0.077295	0.0286814		1.2413	-0.353376	0.0471631
1.24209	2.47317	0.617285		1.24219	0.034931	0.0134554		1.24185	-0.413446	0.0324938		1.24258	-0.077843	0.0286417		1.24213	-0.352382	0.0472316
1.24293	2.47226	0.617251		1.24302	0.03465	0.0134479		1.24268	-0.412734	0.0325394		1.24341	-0.078408	0.0286008		1.24296	-0.353455	0.0471576
1.24376	2.47257	0.617263		1.24385	0.034627	0.0134473		1.24351	-0.413788	0.0324719		1.24425	-0.079186	0.0285444		1.24379	-0.353013	0.0471881
1.24459	2.47322	0.617287		1.24469	0.03534	0.0134663		1.24435	-0.413036	0.03252		1.24508	-0.078727	0.0285776		1.24462	-0.35305	0.0471855
1.24542	2.47284	0.617273		1.24552	0.035138	0.0134609		1.24518	-0.412992	0.0325228		1.24591	-0.0795	0.0285216		1.24545	-0.351484	0.0472935
1.24625	2.47274	0.617269		1.24635	0.034692	0.013449		1.24601	-0.41124	0.032635		1.24674	-0.080961	0.0284157		1.24629	-0.350544	0.0473582
1.24709	2.47277	0.61727		1.24718	0.033968	0.0134298		1.24684	-0.411598	0.0326121		1.24758	-0.081964	0.028343		1.24712	-0.351821	0.0472702
1.24792	2.47225	0.617251		1.24802	0.033876	0.0134274		1.24767	-0.4099	0.0327208		1.24841	-0.081931	0.0283454		1.24795	-0.35181	0.047271
1.24875	2.47196	0.617241		1.24885	0.034464	0.013443		1.2485	-0.410086	0.0327089		1.24924	-0.081684	0.0283633		1.24878	-0.353195	0.0471756
1.24958	2.4718	0.617234		1.24968	0.034488	0.0134436		1.24934	-0.411387	0.0326256		1.25007	-0.08066	0.0284375		1.24961	-0.352885	0.0471969
1.25041	2.47146	0.617222		1.25051	0.034757	0.0134508		1.25017	-0.411779	0.0326005		1.25091	-0.079636	0.0285117		1.25045	-0.353126	0.0471803
1.25125	2.47095	0.617203		1.25134	0.034591	0.0134464		1.251	-0.411189	0.0326383		1.25174	-0.07888	0.0285665		1.25128	-0.354255	0.0471025
1.25208	2.47019	0.617175		1.25218	0.034012	0.013431		1.25183	-0.411112	0.0326432		1.25257	-0.078523	0.0285924		1.25211	-0.354874	0.0470599
1.25291	2.46963	0.617154		1.25301	0.034163	0.013435		1.25266	-0.410217	0.0327005		1.2534	-0.07763	0.0286572		1.25294	-0.354978	0.0470527
1.25374	2.46978	0.61716		1.25384	0.033081	0.0134063		1.2535	-0.411221	0.0326362		1.25423	-0.07908	0.028552		1.25377	-0.355279	0.047032
1.25457	2.47044	0.617184		1.25467	0.03234	0.0133866		1.25433	-0.412258	0.0325698		1.25507	-0.079009	0.0285572		1.25461	-0.356639	0.0469382
1.25541	2.4713	0.617216		1.2555	0.031426	0.0133623		1.25516	-0.413713	0.0324767		1.2559	-0.078835	0.0285698		1.25544	-0.356665	0.0469364
1.25624	2.47066	0.617193		1.25633	0.029707	0.0133167		1.25599	-0.414164	0.0324478		1.25673	-0.078806	0.0285719		1.25627	-0.356999	0.0469134
1.25707	2.47096	0.617203		1.25717	0.029759	0.0133181		1.25682	-0.415178	0.0323829		1.25756	-0.079161	0.0285462		1.2571	-0.357057	0.0469094
1.2579	2.47151	0.617224		1.258	0.029429	0.0133093		1.25765	-0.41488	0.032402		1.2584	-0.079818	0.0284986		1.25793	-0.356302	0.0469615
1.25873	2.47113	0.61721		1.25883	0.028677	0.0132893		1.25849	-0.413096	0.0325162		1.25923	-0.080072	0.0284801		1.25877	-0.356185	0.0469695
1.25957	2.47069	0.617193		1.25966	0.027689	0.0132631		1.25932	-0.413605	0.0324836		1.26006	-0.079934	0.0284901		1.2596	-0.355361	0.0470263
1.2604	2.4709	0.617201		1.26049	0.027526	0.0132588		1.26015	-0.413304	0.0325029		1.26089	-0.080156	0.0284741		1.26043	-0.354911	0.0470573
1.26123	2.47228	0.617252		1.26133	0.026181	0.013223		1.26098	-0.41379	0.0324717		1.26172	-0.077837	0.0286422		1.26126	-0.357174	0.0469014
1.26206	2.47253	0.617262		1.26216	0.026185	0.0132232		1.26181	-0.413909	0.0324641		1.26256	-0.077547	0.0286632		1.26209	-0.358538	0.0468074
1.26289	2.47214	0.617247		1.26299	0.026753	0.0132382		1.26265	-0.414399	0.0324328		1.26339	-0.077105	0.0286952		1.26293	-0.35955	0.0467377
1.26373	2.47192	0.617239		1.26382	0.026864	0.0132412		1.26348	-0.414276	0.0324406		1.26422	-0.077173	0.0286903		1.26376	-0.360125	0.046698
1.26456	2.47184	0.617236		1.26466	0.026621	0.0132347		1.26431	-0.413124	0.0325144		1.26505	-0.076637	0.0287291		1.26459	-0.360217	0.0466917
1.26539	2.47239	0.617256		1.26549	0.025871	0.0132148		1.26514	-0.414683	0.0324146		1.26589	-0.07626	0.0287565		1.26542	-0.360478	0.0466737
1.26622	2.47237	0.617256		1.26632	0.025953	0.013217		1.26597	-0.414593	0.0324203		1.26672	-0.077815	0.0286437		1.26625	-0.359923	0.046712
1.26705	2.47214	0.617247		1.26715	0.025614	0.013208		1.2668	-0.415882	0.0323378		1.26755	-0.076403	0.0287461		1.26709	-0.361702	0.0465894
1.26788	2.47241	0.617257		1.26798	0.025662	0.0132093		1.26764	-0.416377	0.0323061		1.26838	-0.074553	0.0288802		1.26792	-0.360821	0.0466501
1.26872	2.47313	0.617284		1.26882	0.025798	0.0132129		1.26847	-0.417288	0.0322478		1.26922	-0.074585	0.0288779		1.26875	-0.360645	0.0466622
1.26955	2.47389	0.617312		1.26965	0.024857	0.0131879		1.2693	-0.417913	0.0322078		1.27005	-0.07559	0.028805		1.26958	-0.360331	0.0466838
1.27038	2.47343	0.617295		1.27048	0.023989	0.0131648		1.27013	-0.416556	0.0322946		1.27088	-0.075262	0.0288288		1.27041	-0.360723	0.0466568
1.27121	2.47343	0.617295		1.27131	0.023649	0.0131558		1.27096	-0.415715	0.0323485		1.27171	-0.075645	0.028801		1.27125	-0.360455	0.0466753
1.27205	2.47362	0.617302		1.27214	0.023005	0.0131387		1.27179	-0.415813	0.0323422		1.27255	-0.075044	0.0288446		1.27208	-0.359638	0.0467316
1.27288	2.47325	0.617288		1.27297	0.022543	0.0131264		1.27263	-0.415926	0.032335		1.27338	-0.075284	0.0288272		1.27291	-0.359661	0.04673
1.27371	2.47347	0.617296		1.27381	0.022569	0.0131271		1.27346	-0.416404	0.0323044		1.27421	-0.07523	0.0288311		1.27374	-0.360636	0.0466628
1.27454	2.47398	0.617315		1.27464	0.023759	0.0131587		1.27429	-0.416229	0.0323156		1.27504	-0.07374	0.0289391		1.27457	-0.36163	0.0465943
1.27537	2.47399	0.617316		1.27547	0.025016	0.0131921		1.27512	-0.416065	0.0323261		1.27587	-0.073592	0.0289499		1.2754	-0.360751	0.0466549
1.27621	2.47328	0.617289		1.2763	0.025715	0.0132107		1.27595	-0.415341	0.0323724		1.27671	-0.073487	0.0289575		1.27624	-0.359122	0.0467671
1.27704	2.47308	0.617282		1.27713	0.025445	0.0132035		1.27679	-0.415481	0.0323635		1.27754	-0.072261	0.0290463		1.27707	-0.358656	0.0467993
1.27787	2.47346	0.617296		1.27797	0.024958	0.0131906		1.27762	-0.415063	0.0323902		1.27837	-0.071441	0.0291058		1.2779	-0.359152	0.0467651
1.2787	2.47227	0.617252		1.2788	0.024512	0.0131787		1.27845	-0.414975	0.0323959		1.2792	-0.069674	0.0292339		1.27873	-0.359094	0.0467691
1.27953	2.4712	0.617212		1.27963	0.024482	0.0131779		1.27928	-0.415309	0.0323745		1.28004	-0.069388	0.0292546		1.27957	-0.357999	0.0468445
1.28036	2.47069	0.617194		1.28046	0.024814	0.0131867		1.28011	-0.415123	0.0323864		1.28087	-0.069724	0.0292302		1.2804	-0.359178	0.0467633
1.2812	2.47096	0.617204		1.2813	0.024763	0.0131854		1.28094	-0.416031	0.0323283		1.2817	-0.069657	0.0292351		1.28123	-0.360916	0.0466435
1.28203	2.46994	0.617166		1.28213	0.026194	0.0132234		1.28178	-0.416302	0.0323109		1.28253	-0.071106	0.0291301		1.28206	-0.360745	0.0466553
1.28286	2.46984	0.617162		1.28296	0.026043	0.0132194		1.28261	-0.41606	0.0323264		1.28336	-0.070801	0.0291522		1.28289	-0.359751	0.0467238
1.28369	2.46978	0.61716		1.28379	0.025573	0.0132069		1.28344	-0.41504	0.0323917		1.2842	-0.069672	0.029234		1.28373	-0.358338	0.0468212
1.28452	2.47032	0.61718		1.28462	0.025233	0.0131979		1.28427	-0.415549	0.0323591		1.28503	-0.068534	0.0293165		1.28456	-0.35773	0.0468631
1.28536	2.4714	0.61722		1.28546	0.025305	0.0131998		1.2851	-0.416775	0.0322806		1.28586	-0.067704	0.0293767		1.28539	-0.357324	0.046891
1.28619	2.46951	0.61715		1.28629	0.024603	0.0131811		1.28594	-0.416772	0.0322808		1.28669	-0.069044	0.0292795		1.28622	-0.357309	0.0468921
1.28702	2.47013	0.617173		1.28712	0.02375	0.0131585		1.28677	-0.417036	0.0322639		1.28753	-0.068346	0.0293301		1.28705	-0.358089	0.0468383
1.28785	2.47099	0.617205		1.28795	0.024127	0.0131685		1.2876	-0.417727	0.0322197		1.28836	-0.068189	0.0293415		1.28788	-0.358946	0.0467793
1.28868	2.47185	0.617236		1.28878	0.023692	0.013157		1.28843	-0.419378	0.032114		1.28919	-0.069149	0.0292719		1.28872	-0.360848	0.0466482
1.28952	2.4718	0.617235		1.28961	0.023205	0.013144		1.28926	-0.419936	0.0320782		1.29002	-0.068143	0.0293448		1.28955	-0.362381	0.0465426
1.29035	2.47118	0.617211		1.29045	0.02265	0.0131293		1.29009	-0.420109	0.0320672		1.29086	-0.067681	0.0293783		1.29038	-0.362471	0.0465364
1.29118	2.47201	0.617242		1.29128	0.022528	0.013126		1.29093	-0.421349	0.0319878		1.29169	-0.067278	0.0294075		1.29121	-0.363687	0.0464526
1.29201	2.47301	0.617279		1.29211	0.023052	0.01314		1.29176	-0.421581	0.0319729		1.29252	-0.068214	0.0293397		1.29205	-0.364447	0.0464002
1.29284	2.47355	0.617299		1.29294	0.024129	0.0131686		1.29259	-0.421428	0.0319827		1.29335	-0.070661	0.0291623		1.29288	-0.364878	0.0463705
1.29368	2.47503	0.617354		1.29377	0.025184	0.0131966		1.29342	-0.421074	0.0320054		1.29418	-0.070525	0.0291722		1.29371	-0.365598	0.0463209
1.29451	2.47565	0.617377		1.29461	0.026316	0.0132266		1.29425	-0.421352	0.0319876		1.29502	-0.06969	0.0292327		1.29454	-0.365256	0.0463445
1.29534	2.47508	0.617356		1.29544	0.025819	0.0132134		1.29508	-0.421761	0.0319614		1.29585	-0.070536	0.0291714		1.29537	-0.364028	0.0464291
1.29617	2.47543	0.617369		1.29627	0.023902	0.0131625		1.29592	-0.421748	0.0319622		1.29668	-0.070693	0.02916		1.29621	-0.364979	0.0463636
1.297	2.47466	0.617341		1.2971	0.025068	0.0131935		1.29675	-0.422172	0.0319351		1.29751	-0.070625	0.0291649		1.29704	-0.367204	0.0462102
1.29784	2.47498	0.617352		1.29794	0.027019	0.0132453		1.29758	-0.42127	0.0319928		1.29835	-0.071259	0.029119		1.29787	-0.367368	0.0461989
1.29867	2.47484	0.617347		1.29877	0.026723	0.0132374		1.29841	-0.421407	0.031984		1.29918	-0.071935	0.02907		1.2987	-0.367303	0.0462034
1.2995	2.47588	0.617385		1.2996	0.026446	0.0132301		1.29924	-0.420685	0.0320303		1.30001	-0.073348	0.0289675		1.29953	-0.368103	0.0461483
1.30033	2.47578	0.617382		1.30043	0.025907	0.0132158		1.30008	-0.420801	0.0320228		1.30084	-0.073558	0.0289523		1.30036	-0.369179	0.0460742
1.30116	2.47573	0.61738		1.30126	0.026237	0.0132245		1.30091	-0.421118	0.0320026		1.30167	-0.074426	0.0288894		1.3012	-0.370007	0.0460171
1.302	2.4753	0.617364		1.3021	0.026483	0.0132311		1.30174	-0.419945	0.0320777		1.30251	-0.075026	0.0288459		1.30203	-0.370652	0.0459727
1.30283	2.47583	0.617384		1.30293	0.026368	0.013228		1.30257	-0.41978	0.0320882		1.30334	-0.074312	0.0288977		1.30286	-0.370591	0.0459769
1.30366	2.47434	0.617328		1.30376	0.025688	0.01321		1.3034	-0.420077	0.0320692		1.30417	-0.07565	0.0288007		1.30369	-0.371277	0.0459296
1.30449	2.47279	0.617271		1.30459	0.025993	0.0132181		1.30423	-0.420123	0.0320663		1.305	-0.07596	0.0287782		1.30452	-0.373132	0.0458018
1.30532	2.47132	0.617217		1.30542	0.02579	0.0132127		1.30507	-0.420684	0.0320303		1.30584	-0.07663	0.0287296		1.30536	-0.37276	0.0458274
1.30615	2.47035	0.617181		1.30626	0.025396	0.0132022		1.3059	-0.421282	0.031992		1.30667	-0.077252	0.0286846		1.30619	-0.372532	0.0458431
1.30699	2.47151	0.617224		1.30709	0.025939	0.0132166		1.30673	-0.419951	0.0320773		1.3075	-0.075701	0.028797		1.30702	-0.373363	0.0457858
1.30782	2.47112	0.617209		1.30792	0.025934	0.0132165		1.30756	-0.419005	0.0321378		1.30833	-0.07579	0.0287905		1.30785	-0.375242	0.0456564
1.30865	2.47059	0.61719		1.30875	0.024613	0.0131814		1.30839	-0.418939	0.0321421		1.30916	-0.076895	0.0287104		1.30868	-0.373291	0.0457908
1.30948	2.46941	0.617146		1.30958	0.024895	0.0131889		1.30923	-0.417568	0.0322299		1.31	-0.077146	0.0286922		1.30952	-0.37287	0.0458198
1.31031	2.46862	0.617117		1.31042	0.024117	0.0131682		1.31006	-0.41839	0.0321772		1.31083	-0.078093	0.0286236		1.31035	-0.37182	0.0458922
1.31115	2.46864	0.617118		1.31125	0.024244	0.0131716		1.31089	-0.417806	0.0322146		1.31166	-0.078766	0.0285748		1.31118	-0.371609	0.0459067
1.31198	2.46813	0.617098		1.31208	0.024268	0.0131722		1.31172	-0.416757	0.0322818		1.31249	-0.079944	0.0284894		1.31201	-0.3712	0.0459349
1.31281	2.46725	0.617066		1.31291	0.022564	0.013127		1.31255	-0.416889	0.0322733		1.31333	-0.079156	0.0285465		1.31284	-0.370356	0.0459931
1.31364	2.4673	0.617068		1.31374	0.021102	0.0130882		1.31338	-0.416378	0.032306		1.31416	-0.078773	0.0285743		1.31368	-0.371091	0.0459424
1.31447	2.46665	0.617044		1.31458	0.020417	0.01307		1.31421	-0.41707	0.0322617		1.31499	-0.079979	0.0284869		1.31451	-0.372184	0.0458671
1.31531	2.46644	0.617036		1.31541	0.019774	0.0130529		1.31505	-0.417397	0.0322408		1.31582	-0.082273	0.0283206		1.31534	-0.371994	0.0458802
1.31614	2.4667	0.617046		1.31624	0.019438	0.013044		1.31588	-0.417751	0.0322181		1.31665	-0.082639	0.0282941		1.31617	-0.37395	0.0457454
1.31697	2.46669	0.617045		1.31707	0.018424	0.0130171		1.31671	-0.417753	0.032218		1.31749	-0.083787	0.0282109		1.317	-0.375731	0.0456227
1.3178	2.46739	0.617071		1.3179	0.015955	0.0129515		1.31754	-0.417804	0.0322147		1.31832	-0.084266	0.0281761		1.31784	-0.376296	0.0455837
1.31863	2.4676	0.617079		1.31874	0.014877	0.0129229		1.31837	-0.419216	0.0321243		1.31915	-0.084734	0.0281422		1.31867	-0.378195	0.0454529
1.31947	2.46648	0.617038		1.31957	0.01491	0.0129238		1.31921	-0.418566	0.032166		1.31998	-0.084957	0.028126		1.3195	-0.376799	0.0455491
1.3203	2.46612	0.617024		1.3204	0.013896	0.0128968		1.32004	-0.41925	0.0321222		1.32082	-0.083605	0.028224		1.32033	-0.377445	0.0455046
1.32113	2.46661	0.617042		1.32123	0.014592	0.0129153		1.32087	-0.418717	0.0321563		1.32165	-0.083669	0.0282194		1.32116	-0.37817	0.0454546
1.32196	2.4669	0.617053		1.32206	0.013918	0.0128974		1.3217	-0.418157	0.0321921		1.32248	-0.083144	0.0282575		1.322	-0.377016	0.0455341
1.32279	2.46791	0.61709		1.3229	0.013465	0.0128854		1.32253	-0.419237	0.032123		1.32331	-0.083832	0.0282076		1.32283	-0.376662	0.0455585
1.32363	2.46811	0.617098		1.32373	0.012783	0.0128673		1.32336	-0.419402	0.0321124		1.32415	-0.083942	0.0281996		1.32366	-0.376549	0.0455663
1.32446	2.46889	0.617127		1.32456	0.012992	0.0128728		1.3242	-0.419916	0.0320795		1.32498	-0.082408	0.0283108		1.32449	-0.375896	0.0456113
1.32529	2.47004	0.617169		1.32539	0.011902	0.0128439		1.32503	-0.420332	0.0320529		1.32581	-0.082225	0.0283241		1.32532	-0.375379	0.0456469
1.32612	2.47204	0.617243		1.32622	0.010867	0.0128164		1.32586	-0.419616	0.0320987		1.32664	-0.082433	0.028309		1.32615	-0.375348	0.0456491
1.32695	2.47275	0.61727		1.32706	0.009985	0.012793		1.32669	-0.418664	0.0321597		1.32747	-0.084249	0.0281774		1.32699	-0.377543	0.0454978
1.32778	2.47228	0.617252		1.32789	0.009415	0.0127778		1.32752	-0.419046	0.0321352		1.32831	-0.085482	0.028088		1.32782	-0.378278	0.0454472
1.32862	2.47136	0.617218		1.32872	0.008753	0.0127603		1.32836	-0.420759	0.0320255		1.32914	-0.085831	0.0280627		1.32865	-0.378609	0.0454244
1.32945	2.47125	0.617214		1.32955	0.008946	0.0127654		1.32919	-0.422188	0.031934		1.32997	-0.086475	0.028016		1.32948	-0.379091	0.0453912
1.33028	2.4717	0.617231		1.33038	0.008205	0.0127457		1.33002	-0.421818	0.0319577		1.3308	-0.087203	0.0279632		1.33031	-0.380245	0.0453116
1.33111	2.47216	0.617248		1.33122	0.007541	0.0127281		1.33085	-0.420778	0.0320243		1.33164	-0.08769	0.0279279		1.33115	-0.380545	0.045291
1.33194	2.47226	0.617252		1.33205	0.005778	0.0126813		1.33168	-0.420761	0.0320254		1.33247	-0.088285	0.0278848		1.33198	-0.380166	0.0453171
1.33278	2.47269	0.617268		1.33288	0.00521	0.0126662		1.33251	-0.421196	0.0319976		1.3333	-0.088368	0.0278788		1.33281	-0.381005	0.0452593
1.33361	2.47292	0.617276		1.33371	0.005409	0.0126715		1.33335	-0.421825	0.0319573		1.33413	-0.089351	0.0278075		1.33364	-0.381424	0.0452304
1.33444	2.47274	0.61727		1.33454	0.004589	0.0126497		1.33418	-0.422279	0.0319282		1.33496	-0.089704	0.0277819		1.33448	-0.381493	0.0452256
1.33527	2.47202	0.617243		1.33538	0.004352	0.0126434		1.33501	-0.421675	0.0319669		1.3358	-0.089575	0.0277913		1.33531	-0.381311	0.0452382
1.33611	2.47325	0.617288		1.33621	0.002377	0.012591		1.33584	-0.420845	0.03202		1.33663	-0.089062	0.0278285		1.33614	-0.381615	0.0452172
1.33694	2.47311	0.617283		1.33704	0.000442	0.0125396		1.33667	-0.420168	0.0320634		1.33746	-0.088896	0.0278405		1.33697	-0.382127	0.045182
1.33777	2.47399	0.617316		1.33787	0.001857	0.0125771		1.3375	-0.420039	0.0320716		1.33829	-0.088122	0.0278966		1.3378	-0.38053	0.045292
1.3386	2.475	0.617353		1.3387	0.003114	0.0126105		1.33834	-0.420135	0.0320655		1.33913	-0.087939	0.0279099		1.33864	-0.379992	0.0453291
1.33943	2.47437	0.61733		1.33954	0.003153	0.0126116		1.33917	-0.419593	0.0321002		1.33996	-0.087469	0.027944		1.33947	-0.378953	0.0454007
1.34027	2.4747	0.617342		1.34037	0.001975	0.0125803		1.34	-0.419544	0.0321033		1.34079	-0.087376	0.0279507		1.3403	-0.380253	0.0453111
1.3411	2.47392	0.617313		1.3412	0.001946	0.0125795		1.34083	-0.419596	0.0321		1.34162	-0.088132	0.0278959		1.34113	-0.380696	0.0452806
1.34193	2.4739	0.617312		1.34203	0.000406	0.0125386		1.34166	-0.420503	0.0320419		1.34246	-0.088611	0.0278612		1.34196	-0.38059	0.0452879
1.34276	2.47437	0.61733		1.34286	-0.000397	0.0125173		1.3425	-0.420914	0.0320156		1.34329	-0.089786	0.027776		1.34279	-0.381456	0.0452282
1.34359	2.47353	0.617298		1.3437	-0.001115	0.0124982		1.34333	-0.420296	0.0320552		1.34412	-0.09056	0.0277199		1.34363	-0.382211	0.0451762
1.34442	2.47379	0.617308		1.34453	-0.001946	0.0124762		1.34416	-0.419611	0.032099		1.34495	-0.090954	0.0276913		1.34446	-0.381691	0.045212
1.34526	2.47492	0.61735		1.34536	-0.002038	0.0124737		1.34499	-0.41906	0.0321343		1.34579	-0.092818	0.0275562		1.34529	-0.383679	0.045075
1.34609	2.47652	0.617409		1.34619	-0.002277	0.0124674		1.34582	-0.4197	0.0320933		1.34662	-0.09434	0.0274459		1.34612	-0.384362	0.0450279
1.34692	2.47552	0.617372		1.34702	-0.002072	0.0124728		1.34665	-0.42071	0.0320287		1.34745	-0.095016	0.0273969		1.34695	-0.386271	0.0448964
1.34775	2.47522	0.617361		1.34786	-0.002708	0.0124559		1.34749	-0.421017	0.032009		1.34828	-0.0939	0.0274778		1.34779	-0.386368	0.0448897
1.34858	2.47377	0.617308		1.34869	-0.005314	0.0123867		1.34832	-0.421135	0.0320015		1.34911	-0.094136	0.0274607		1.34862	-0.384987	0.0449849
1.34942	2.47541	0.617368		1.34952	-0.005767	0.0123747		1.34915	-0.419412	0.0321118		1.34995	-0.094195	0.0274564		1.34945	-0.38337	0.0450963
1.35025	2.47709	0.61743		1.35035	-0.006412	0.0123576		1.34998	-0.418215	0.0321884		1.35078	-0.093215	0.0275274		1.35028	-0.385215	0.0449692
1.35108	2.47791	0.617461		1.35118	-0.007859	0.0123191		1.35081	-0.418142	0.0321931		1.35161	-0.093308	0.0275207		1.35111	-0.382654	0.0451456
1.35191	2.47809	0.617468		1.35202	-0.007592	0.0123262		1.35164	-0.418651	0.0321605		1.35244	-0.093276	0.027523		1.35195	-0.382272	0.045172
1.35274	2.47797	0.617463		1.35285	-0.007408	0.0123311		1.35248	-0.419515	0.0321052		1.35328	-0.093189	0.0275293		1.35278	-0.382977	0.0451234
1.35358	2.47768	0.617452		1.35368	-0.007871	0.0123188		1.35331	-0.420441	0.0320459		1.35411	-0.093603	0.0274993		1.35361	-0.382374	0.0451649
1.35441	2.47895	0.617499		1.35451	-0.007586	0.0123264		1.35414	-0.419763	0.0320893		1.35494	-0.09323	0.0275264		1.35444	-0.382672	0.0451444
1.35524	2.47893	0.617499		1.35534	-0.00808	0.0123133		1.35497	-0.41928	0.0321202		1.35577	-0.09322	0.0275271		1.35527	-0.382541	0.0451534
1.35607	2.48039	0.617553		1.35618	-0.008699	0.0122968		1.3558	-0.41948	0.0321074		1.3566	-0.093812	0.0274842		1.35611	-0.382241	0.0451741
1.3569	2.47888	0.617497		1.35701	-0.007825	0.01232		1.35664	-0.419658	0.032096		1.35744	-0.093069	0.027538		1.35694	-0.38263	0.0451473
1.35774	2.47845	0.617481		1.35784	-0.006438	0.0123569		1.35747	-0.420168	0.0320634		1.35827	-0.093146	0.0275324		1.35777	-0.382234	0.0451746
1.35857	2.47721	0.617435		1.35867	-0.00697	0.0123427		1.3583	-0.420418	0.0320474		1.3591	-0.093744	0.0274891		1.3586	-0.381578	0.0452198
1.3594	2.4758	0.617383		1.3595	-0.00858	0.0123		1.35913	-0.419977	0.0320756		1.35993	-0.093295	0.0275216		1.35943	-0.38203	0.0451886
1.36023	2.47641	0.617405		1.36034	-0.009881	0.0122654		1.35996	-0.419831	0.032085		1.36077	-0.092639	0.0275692		1.36027	-0.38282	0.0451342
1.36106	2.47622	0.617398		1.36117	-0.010618	0.0122459		1.36079	-0.420239	0.0320588		1.3616	-0.093393	0.0275145		1.3611	-0.383873	0.0450616
1.3619	2.47664	0.617414		1.362	-0.010321	0.0122538		1.36163	-0.420272	0.0320567		1.36243	-0.095058	0.0273938		1.36193	-0.383822	0.0450652
1.36273	2.47704	0.617429		1.36283	-0.010582	0.0122468		1.36246	-0.41978	0.0320882		1.36326	-0.096286	0.0273048		1.36276	-0.383851	0.0450632
1.36356	2.47608	0.617393		1.36366	-0.011347	0.0122265		1.36329	-0.419401	0.0321125		1.3641	-0.095703	0.0273471		1.36359	-0.382974	0.0451236
1.36439	2.47744	0.617443		1.3645	-0.013254	0.0121759		1.36412	-0.418892	0.0321451		1.36493	-0.093634	0.0274971		1.36443	-0.382194	0.0451773
1.36522	2.47787	0.617459		1.36533	-0.013565	0.0121676		1.36495	-0.419322	0.0321175		1.36576	-0.092687	0.0275657		1.36526	-0.383802	0.0450665
1.36606	2.47698	0.617426		1.36616	-0.01454	0.0121417		1.36579	-0.420069	0.0320697		1.36659	-0.092202	0.0276009		1.36609	-0.382876	0.0451303
1.36689	2.47631	0.617402		1.36699	-0.014832	0.012134		1.36662	-0.419909	0.03208		1.36742	-0.092339	0.0275909		1.36692	-0.383113	0.045114
1.36772	2.47644	0.617406		1.36782	-0.014631	0.0121393		1.36745	-0.419517	0.0321051		1.36826	-0.092587	0.027573		1.36775	-0.38254	0.0451535
1.36855	2.47713	0.617432		1.36866	-0.014214	0.0121504		1.36828	-0.419651	0.0320965		1.36909	-0.092651	0.0275683		1.36859	-0.3819	0.0451976
1.36938	2.47889	0.617497		1.36949	-0.012988	0.0121829		1.36911	-0.420686	0.0320302		1.36992	-0.093391	0.0275147		1.36942	-0.381754	0.0452077
1.37021	2.47787	0.617459		1.37032	-0.012803	0.0121879		1.36994	-0.421417	0.0319834		1.37075	-0.094706	0.0274194		1.37025	-0.382924	0.045127
1.37105	2.47638	0.617404		1.37115	-0.012577	0.0121939		1.37078	-0.421225	0.0319957		1.37159	-0.09502	0.0273966		1.37108	-0.382241	0.0451741
1.37188	2.47603	0.617391		1.37198	-0.012472	0.0121966		1.37161	-0.42229	0.0319275		1.37242	-0.094261	0.0274516		1.37191	-0.383573	0.0450823
1.37271	2.47725	0.617436		1.37282	-0.013698	0.0121641		1.37244	-0.42236	0.031923		1.37325	-0.095045	0.0273948		1.37275	-0.383878	0.0450613
1.37354	2.47751	0.617446		1.37365	-0.013816	0.012161		1.37327	-0.421856	0.0319553		1.37408	-0.094853	0.0274087		1.37358	-0.384069	0.0450481
1.37437	2.47704	0.617428		1.37448	-0.014489	0.0121431		1.3741	-0.421841	0.0319563		1.37491	-0.094807	0.027412		1.37441	-0.385234	0.0449679
1.37521	2.47537	0.617367		1.37531	-0.015174	0.0121249		1.37494	-0.421898	0.0319526		1.37575	-0.095152	0.027387		1.37524	-0.387229	0.0448304
1.37604	2.47585	0.617384		1.37614	-0.015767	0.0121092		1.37577	-0.422125	0.0319381		1.37658	-0.095046	0.0273947		1.37607	-0.388533	0.0447405
1.37687	2.47503	0.617354		1.37698	-0.016867	0.0120799		1.3766	-0.422306	0.0319265		1.37741	-0.094211	0.0274552		1.37691	-0.388785	0.0447232
1.3777	2.475	0.617353		1.37781	-0.019065	0.0120216		1.37743	-0.422592	0.0319082		1.37824	-0.094853	0.0274087		1.37774	-0.388423	0.0447481
1.37853	2.47535	0.617366		1.37864	-0.020559	0.0119819		1.37826	-0.423048	0.031879		1.37908	-0.095665	0.0273498		1.37857	-0.388297	0.0447568
1.37937	2.47543	0.617369		1.37947	-0.02138	0.0119601		1.37909	-0.422875	0.0318901		1.37991	-0.09683	0.0272654		1.3794	-0.3895	0.0446739
1.3802	2.47597	0.617389		1.3803	-0.022239	0.0119373		1.37993	-0.422122	0.0319383		1.38074	-0.097736	0.0271997		1.38023	-0.389012	0.0447075
1.38103	2.47591	0.617387		1.38114	-0.022735	0.0119241		1.38076	-0.422191	0.0319338		1.38157	-0.098161	0.0271689		1.38106	-0.389356	0.0446838
1.38186	2.4761	0.617394		1.38197	-0.023712	0.0118982		1.38159	-0.422444	0.0319176		1.38241	-0.097744	0.0271991		1.3819	-0.389168	0.0446968
1.38269	2.47607	0.617393		1.3828	-0.025558	0.0118492		1.38242	-0.422084	0.0319407		1.38324	-0.096236	0.0273085		1.38273	-0.389108	0.0447009
1.38353	2.47692	0.617424		1.38363	-0.026945	0.0118123		1.38325	-0.422103	0.0319395		1.38407	-0.095525	0.02736		1.38356	-0.389327	0.0446858
1.38436	2.47676	0.617418		1.38447	-0.026972	0.0118116		1.38409	-0.422731	0.0318993		1.3849	-0.096355	0.0272998		1.38439	-0.390146	0.0446294
1.38519	2.47571	0.617379		1.3853	-0.027577	0.0117955		1.38492	-0.424197	0.0318054		1.38573	-0.09841	0.0271509		1.38522	-0.390635	0.0445957
1.38602	2.47524	0.617362		1.38613	-0.027875	0.0117876		1.38575	-0.424401	0.0317923		1.38657	-0.099597	0.0270648		1.38606	-0.39019	0.0446264
1.38685	2.47583	0.617384		1.38696	-0.028824	0.0117624		1.38658	-0.423695	0.0318375		1.3874	-0.099519	0.0270705		1.38689	-0.39151	0.0445354
1.38769	2.47607	0.617393		1.38779	-0.029654	0.0117404		1.38741	-0.424102	0.0318115		1.38823	-0.098843	0.0271195		1.38772	-0.391205	0.0445564
1.38852	2.47629	0.617401		1.38862	-0.031304	0.0116966		1.38824	-0.423669	0.0318392		1.38906	-0.098748	0.0271264		1.38855	-0.391881	0.0445098
1.38935	2.47541	0.617368		1.38946	-0.032576	0.0116628		1.38908	-0.422264	0.0319292		1.3899	-0.098945	0.0271121		1.38939	-0.391333	0.0445476
1.39018	2.47446	0.617333		1.39029	-0.033501	0.0116382		1.38991	-0.421278	0.0319923		1.39073	-0.097939	0.027185		1.39022	-0.391738	0.0445197
1.39101	2.47362	0.617302		1.39112	-0.034577	0.0116097		1.39074	-0.421372	0.0319863		1.39156	-0.096689	0.0272756		1.39105	-0.391111	0.0445629
1.39184	2.47394	0.617314		1.39195	-0.03542	0.0115873		1.39157	-0.421966	0.0319483		1.39239	-0.096583	0.0272833		1.39188	-0.391726	0.0445205
1.39268	2.47407	0.617319		1.39278	-0.035519	0.0115847		1.3924	-0.421411	0.0319838		1.39322	-0.096901	0.0272603		1.39271	-0.392024	0.0445
1.39351	2.47082	0.617198		1.39362	-0.034868	0.0116019		1.39324	-0.420814	0.032022		1.39406	-0.096482	0.0272906		1.39355	-0.392218	0.0444866
1.39434	2.47149	0.617223		1.39445	-0.035052	0.0115971		1.39407	-0.42053	0.0320402		1.39489	-0.095735	0.0273448		1.39438	-0.392001	0.0445016
1.39517	2.47197	0.617241		1.39528	-0.036976	0.011546		1.3949	-0.420464	0.0320444		1.39572	-0.095588	0.0273554		1.39521	-0.391471	0.0445381
1.396	2.47312	0.617283		1.39611	-0.038162	0.0115145		1.39573	-0.421227	0.0319956		1.39655	-0.095992	0.0273261		1.39604	-0.389167	0.0446968
1.39684	2.47316	0.617285		1.39695	-0.037586	0.0115298		1.39656	-0.421689	0.031966		1.39739	-0.096576	0.0272838		1.39687	-0.387666	0.0448003
1.39767	2.4732	0.617286		1.39778	-0.037803	0.011524		1.39739	-0.421495	0.0319784		1.39822	-0.096736	0.0272722		1.3977	-0.387011	0.0448454
1.3985	2.4738	0.617309		1.39861	-0.03778	0.0115246		1.39823	-0.421586	0.0319726		1.39905	-0.096535	0.0272868		1.39854	-0.387504	0.0448114
1.39933	2.47455	0.617336		1.39944	-0.038843	0.0114964		1.39906	-0.421591	0.0319723		1.39988	-0.096837	0.0272649		1.39937	-0.387201	0.0448323
1.40017	2.47437	0.61733		1.40027	-0.040364	0.011456		1.39989	-0.421761	0.0319614		1.40071	-0.096665	0.0272774		1.4002	-0.387831	0.0447889
1.401	2.47282	0.617272		1.40111	-0.041223	0.0114332		1.40072	-0.423079	0.031877		1.40155	-0.096915	0.0272592		1.40103	-0.387581	0.0448061
1.40183	2.47159	0.617227		1.40194	-0.041725	0.0114199		1.40155	-0.424148	0.0318085		1.40238	-0.09736	0.027227		1.40186	-0.387886	0.0447851
1.40266	2.47163	0.617228		1.40277	-0.040559	0.0114508		1.40238	-0.424605	0.0317793		1.40321	-0.097655	0.0272056		1.4027	-0.387797	0.0447913
1.40349	2.4725	0.617261		1.4036	-0.039318	0.0114838		1.40322	-0.424717	0.0317721		1.40404	-0.098503	0.0271441		1.40353	-0.387853	0.0447874
1.40433	2.47081	0.617198		1.40443	-0.038847	0.0114963		1.40405	-0.424172	0.031807		1.40488	-0.099042	0.0271051		1.40436	-0.388651	0.0447324
1.40516	2.4721	0.617246		1.40526	-0.040632	0.0114489		1.40488	-0.424469	0.031788		1.40571	-0.09782	0.0271936		1.40519	-0.388243	0.0447605
1.40599	2.47127	0.617215		1.4061	-0.03941	0.0114813		1.40571	-0.424034	0.0318158		1.40654	-0.096555	0.0272853		1.40602	-0.389408	0.0446802
1.40682	2.47173	0.617232		1.40693	-0.040204	0.0114602		1.40654	-0.423822	0.0318294		1.40737	-0.096378	0.0272982		1.40686	-0.389997	0.0446397
1.40765	2.47258	0.617263		1.40776	-0.040437	0.0114541		1.40738	-0.424426	0.0317907		1.4082	-0.097176	0.0272403		1.40769	-0.389874	0.0446481
1.40848	2.47301	0.617279		1.40859	-0.040627	0.011449		1.40821	-0.423626	0.031842		1.40904	-0.098411	0.0271508		1.40852	-0.390904	0.0445772
1.40932	2.47345	0.617296		1.40942	-0.040501	0.0114524		1.40904	-0.424488	0.0317868		1.40987	-0.098659	0.0271328		1.40935	-0.391269	0.044552
1.41015	2.47338	0.617293		1.41026	-0.04081	0.0114442		1.40987	-0.426473	0.0316597		1.4107	-0.098982	0.0271094		1.41018	-0.392206	0.0444874
1.41098	2.47307	0.617281		1.41109	-0.041165	0.0114347		1.4107	-0.427529	0.0315921		1.41153	-0.099368	0.0270814		1.41102	-0.393275	0.0444138
1.41181	2.47473	0.617343		1.41192	-0.041168	0.0114346		1.41153	-0.428583	0.0315246		1.41237	-0.099227	0.0270917		1.41185	-0.394326	0.0443414
1.41264	2.47569	0.617378		1.41275	-0.041293	0.0114313		1.41237	-0.429656	0.0314559		1.4132	-0.099129	0.0270988		1.41268	-0.39434	0.0443404
1.41348	2.47487	0.617348		1.41359	-0.042264	0.0114055		1.4132	-0.430622	0.031394		1.41403	-0.099604	0.0270643		1.41351	-0.393635	0.044389
1.41431	2.47733	0.617439		1.41442	-0.043574	0.0113708		1.41403	-0.431396	0.0313445		1.41486	-0.100128	0.0270263		1.41434	-0.394411	0.0443355
1.41514	2.4753	0.617364		1.41525	-0.043852	0.0113634		1.41486	-0.432547	0.0312708		1.4157	-0.101074	0.0269578		1.41518	-0.395557	0.0442565
1.41597	2.47523	0.617361		1.41608	-0.043147	0.0113821		1.41569	-0.433477	0.0312112		1.41653	-0.10244	0.0268587		1.41601	-0.395764	0.0442423
1.4168	2.47529	0.617364		1.41691	-0.043262	0.011379		1.41652	-0.434079	0.0311727		1.41736	-0.102964	0.0268208		1.41684	-0.396606	0.0441843
1.41764	2.47654	0.61741		1.41775	-0.044486	0.0113465		1.41736	-0.435308	0.031094		1.41819	-0.10272	0.0268385		1.41767	-0.397656	0.0441119
1.41847	2.47777	0.617456		1.41858	-0.044435	0.0113479		1.41819	-0.436668	0.0310069		1.41902	-0.103896	0.0267532		1.4185	-0.398783	0.0440342
1.4193	2.47768	0.617452		1.41941	-0.045033	0.011332		1.41902	-0.437446	0.0309571		1.41986	-0.105093	0.0266664		1.41934	-0.399495	0.0439852
1.42013	2.47673	0.617417		1.42024	-0.04358	0.0113706		1.41985	-0.437797	0.0309346		1.42069	-0.104566	0.0267046		1.42017	-0.400023	0.0439488
1.42096	2.47708	0.61743		1.42107	-0.043421	0.0113748		1.42068	-0.438136	0.0309129		1.42152	-0.104362	0.0267194		1.421	-0.399828	0.0439622
1.42179	2.47907	0.617504		1.4219	-0.042664	0.0113949		1.42152	-0.438968	0.0308596		1.42235	-0.104307	0.0267234		1.42183	-0.401158	0.0438706
1.42263	2.48124	0.617584		1.42274	-0.043805	0.0113646		1.42235	-0.439133	0.0308491		1.42319	-0.105268	0.0266538		1.42266	-0.401677	0.0438348
1.42346	2.48151	0.617594		1.42357	-0.045043	0.0113318		1.42318	-0.438699	0.0308769		1.42402	-0.105967	0.0266031		1.4235	-0.40209	0.0438064
1.42429	2.48101	0.617576		1.4244	-0.046791	0.0112853		1.42401	-0.439597	0.0308194		1.42485	-0.106281	0.0265803		1.42433	-0.402568	0.0437734
1.42512	2.48046	0.617555		1.42523	-0.047767	0.0112594		1.42484	-0.440931	0.030734		1.42568	-0.107231	0.0265115		1.42516	-0.40245	0.0437816
1.42596	2.47974	0.617529		1.42606	-0.047012	0.0112795		1.42567	-0.440766	0.0307445		1.42651	-0.108459	0.0264224		1.42599	-0.402611	0.0437705
1.42679	2.48095	0.617573		1.4269	-0.049204	0.0112213		1.42651	-0.441281	0.0307115		1.42735	-0.109854	0.0263213		1.42682	-0.401691	0.0438339
1.42762	2.4803	0.617549		1.42773	-0.050046	0.0111989		1.42734	-0.442743	0.0306179		1.42818	-0.110897	0.0262457		1.42765	-0.401482	0.0438483
1.42845	2.47852	0.617484		1.42856	-0.050739	0.0111805		1.42817	-0.443702	0.0305565		1.42901	-0.110793	0.0262533		1.42849	-0.400925	0.0438866
1.42928	2.47806	0.617467		1.42939	-0.051304	0.0111655		1.429	-0.444942	0.0304771		1.42984	-0.111364	0.0262119		1.42932	-0.400046	0.0439472
1.43012	2.47625	0.617399		1.43023	-0.052854	0.0111243		1.42983	-0.445317	0.0304531		1.43068	-0.112063	0.0261612		1.43015	-0.399452	0.0439881
1.43095	2.47601	0.617391		1.43106	-0.05556	0.0110525		1.43067	-0.444766	0.0304884		1.43151	-0.11297	0.0260955		1.43098	-0.399147	0.0440092
1.43178	2.47697	0.617426		1.43189	-0.056044	0.0110396		1.4315	-0.444776	0.0304878		1.43234	-0.114411	0.025991		1.43182	-0.398965	0.0440217
1.43261	2.47647	0.617407		1.43272	-0.056468	0.0110284		1.43233	-0.444102	0.0305309		1.43317	-0.115846	0.025887		1.43265	-0.398151	0.0440778
1.43344	2.47541	0.617368		1.43355	-0.056866	0.0110178		1.43316	-0.443238	0.0305862		1.43401	-0.116532	0.0258373		1.43348	-0.399626	0.0439762
1.43427	2.47668	0.617415		1.43439	-0.058534	0.0109735		1.43399	-0.442678	0.0306221		1.43484	-0.117591	0.0257605		1.43431	-0.400787	0.0438962
1.43511	2.47721	0.617435		1.43522	-0.058069	0.0109859		1.43482	-0.443197	0.0305889		1.43567	-0.118308	0.0257085		1.43514	-0.400189	0.0439374
1.43594	2.47985	0.617532		1.43605	-0.058992	0.0109613		1.43565	-0.442303	0.0306461		1.4365	-0.119129	0.025649		1.43598	-0.400014	0.0439494
1.43677	2.47968	0.617526		1.43688	-0.05922	0.0109553		1.43649	-0.441351	0.0307071		1.43734	-0.117752	0.0257488		1.43681	-0.400118	0.0439423
1.4376	2.47945	0.617518		1.43771	-0.059158	0.0109569		1.43732	-0.439802	0.0308062		1.43817	-0.117653	0.025756		1.43764	-0.40022	0.0439352
1.43843	2.47816	0.61747		1.43854	-0.05968	0.0109431		1.43815	-0.438346	0.0308995		1.439	-0.118203	0.0257161		1.43847	-0.398697	0.0440402
1.43927	2.47781	0.617457		1.43938	-0.061398	0.0108975		1.43898	-0.437113	0.0309784		1.43983	-0.117848	0.0257419		1.4393	-0.397453	0.0441259
1.4401	2.47816	0.61747		1.44021	-0.061713	0.0108891		1.43981	-0.436339	0.031028		1.44066	-0.11763	0.0257577		1.44013	-0.396984	0.0441582
1.44093	2.47819	0.617471		1.44104	-0.064025	0.0108277		1.44065	-0.435382	0.0310893		1.4415	-0.117857	0.0257412		1.44097	-0.397439	0.0441269
1.44176	2.47767	0.617452		1.44187	-0.06542	0.0107907		1.44148	-0.434605	0.031139		1.44233	-0.118399	0.0257019		1.4418	-0.39762	0.0441144
1.44259	2.47686	0.617422		1.4427	-0.066538	0.010761		1.44231	-0.433492	0.0312103		1.44316	-0.118285	0.0257102		1.44263	-0.39746	0.0441254
1.44343	2.4755	0.617372		1.44354	-0.067506	0.0107353		1.44314	-0.432066	0.0313016		1.44399	-0.118118	0.0257223		1.44346	-0.397781	0.0441033
1.44426	2.47486	0.617348		1.44437	-0.068831	0.0107001		1.44397	-0.431439	0.0313417		1.44483	-0.117856	0.0257413		1.4443	-0.398752	0.0440364
1.44509	2.4759	0.617386		1.4452	-0.068993	0.0106958		1.4448	-0.430097	0.0314276		1.44566	-0.117787	0.0257463		1.44513	-0.399767	0.0439664
1.44592	2.47664	0.617414		1.44603	-0.070595	0.0106532		1.44564	-0.429535	0.0314636		1.44649	-0.117788	0.0257462		1.44596	-0.39922	0.0440041
1.44675	2.47802	0.617465		1.44687	-0.072575	0.0106007		1.44647	-0.428931	0.0315023		1.44732	-0.117338	0.0257788		1.44679	-0.399924	0.0439556
1.44759	2.47761	0.61745		1.4477	-0.071905	0.0106185		1.4473	-0.428491	0.0315305		1.44815	-0.117224	0.0257871		1.44762	-0.400049	0.043947
1.44842	2.47785	0.617458		1.44853	-0.071738	0.0106229		1.44813	-0.427839	0.0315722		1.44899	-0.116443	0.0258437		1.44845	-0.399346	0.0439954
1.44925	2.47815	0.61747		1.44936	-0.072653	0.0105986		1.44896	-0.426038	0.0316875		1.44982	-0.116227	0.0258594		1.44929	-0.400258	0.0439326
1.45008	2.47761	0.61745		1.45019	-0.073863	0.0105665		1.4498	-0.425397	0.0317286		1.45065	-0.116065	0.0258711		1.45012	-0.400142	0.0439406
1.45091	2.47823	0.617473		1.45103	-0.074758	0.0105427		1.45063	-0.425318	0.0317336		1.45148	-0.115184	0.025935		1.45095	-0.400478	0.0439174
1.45175	2.4783	0.617475		1.45186	-0.073321	0.0105809		1.45146	-0.425478	0.0317234		1.45232	-0.114491	0.0259852		1.45178	-0.400552	0.0439123
1.45258	2.47852	0.617483		1.45269	-0.074029	0.0105621		1.45229	-0.426008	0.0316895		1.45315	-0.114111	0.0260128		1.45261	-0.400745	0.043899
1.45341	2.47852	0.617484		1.45352	-0.075318	0.0105278		1.45312	-0.426339	0.0316683		1.45398	-0.114093	0.0260141		1.45345	-0.402169	0.0438009
1.45424	2.47876	0.617492		1.45435	-0.07598	0.0105102		1.45396	-0.426832	0.0316367		1.45481	-0.114862	0.0259583		1.45428	-0.399818	0.0439629
1.45507	2.47813	0.617469		1.45518	-0.075932	0.0105115		1.45479	-0.426941	0.0316297		1.45565	-0.11421	0.0260056		1.45511	-0.399968	0.0439526
1.45591	2.47725	0.617437		1.45602	-0.076799	0.0104885		1.45562	-0.426432	0.0316623		1.45648	-0.113402	0.0260641		1.45594	-0.400674	0.0439039
1.45674	2.4756	0.617375		1.45685	-0.077684	0.010465		1.45645	-0.427326	0.0316051		1.45731	-0.113427	0.0260623		1.45677	-0.401509	0.0438464
1.45757	2.47431	0.617328		1.45768	-0.078808	0.0104352		1.45728	-0.427287	0.0316076		1.45814	-0.112936	0.0260979		1.45761	-0.402751	0.0437608
1.4584	2.47377	0.617307		1.45851	-0.080488	0.0103905		1.45811	-0.427638	0.0315851		1.45897	-0.112316	0.0261429		1.45844	-0.403447	0.0437129
1.45923	2.47279	0.617271		1.45934	-0.080777	0.0103829		1.45894	-0.428902	0.0315042		1.45981	-0.111945	0.0261698		1.45927	-0.405107	0.0435985
1.46006	2.47118	0.617212		1.46018	-0.080417	0.0103924		1.45978	-0.429848	0.0314436		1.46064	-0.111796	0.0261806		1.4601	-0.407432	0.0434383
1.4609	2.47105	0.617207		1.46101	-0.079877	0.0104068		1.46061	-0.429703	0.0314529		1.46147	-0.111543	0.0261989		1.46093	-0.408681	0.0433522
1.46173	2.47164	0.617229		1.46184	-0.080067	0.0104017		1.46144	-0.430111	0.0314267		1.4623	-0.111698	0.0261877		1.46177	-0.409569	0.043291
1.46256	2.47223	0.61725		1.46267	-0.080886	0.01038		1.46227	-0.430966	0.031372		1.46314	-0.112093	0.026159		1.4626	-0.410913	0.0431984
1.46339	2.4721	0.617246		1.46351	-0.081234	0.0103707		1.4631	-0.431366	0.0313464		1.46397	-0.112793	0.0261083		1.46343	-0.411585	0.0431521
1.46423	2.47146	0.617222		1.46434	-0.080215	0.0103978		1.46394	-0.432024	0.0313043		1.4648	-0.11206	0.0261614		1.46426	-0.410833	0.0432039
1.46506	2.4706	0.61719		1.46517	-0.080379	0.0103934		1.46477	-0.433415	0.0312152		1.46563	-0.111932	0.0261707		1.46509	-0.409443	0.0432997
1.46589	2.47048	0.617186		1.466	-0.081518	0.0103632		1.4656	-0.43402	0.0311765		1.46646	-0.111808	0.0261797		1.46593	-0.408491	0.0433653
1.46672	2.47018	0.617174		1.46683	-0.080407	0.0103927		1.46643	-0.433277	0.031224		1.4673	-0.111994	0.0261662		1.46676	-0.408346	0.0433753
1.46755	2.46895	0.617129		1.46766	-0.079878	0.0104067		1.46726	-0.433232	0.0312269		1.46813	-0.113001	0.0260932		1.46759	-0.408851	0.0433405
1.46838	2.46913	0.617136		1.4685	-0.080267	0.0103964		1.46809	-0.433065	0.0312376		1.46896	-0.113019	0.0260919		1.46842	-0.409648	0.0432856
1.46922	2.46875	0.617121		1.46933	-0.080154	0.0103994		1.46893	-0.433005	0.0312414		1.46979	-0.112798	0.0261079		1.46925	-0.410935	0.0431969
1.47005	2.46825	0.617103		1.47016	-0.079624	0.0104135		1.46976	-0.43365	0.0312001		1.47063	-0.112681	0.0261164		1.47009	-0.411486	0.0431589
1.47088	2.4677	0.617083		1.47099	-0.080003	0.0104034		1.47059	-0.434044	0.0311749		1.47146	-0.112862	0.0261033		1.47092	-0.411747	0.0431409
1.47171	2.46858	0.617115		1.47182	-0.079453	0.010418		1.47142	-0.434628	0.0311375		1.47229	-0.114393	0.0259923		1.47175	-0.411739	0.0431415
1.47254	2.46897	0.61713		1.47266	-0.079827	0.0104081		1.47225	-0.434109	0.0311708		1.47312	-0.116206	0.0258609		1.47258	-0.412194	0.0431101
1.47338	2.46784	0.617088		1.47349	-0.079727	0.0104107		1.47309	-0.432835	0.0312523		1.47395	-0.117118	0.0257948		1.47341	-0.413016	0.0430535
1.47421	2.46826	0.617103		1.47432	-0.078855	0.0104339		1.47392	-0.432652	0.031264		1.47479	-0.117459	0.0257701		1.47425	-0.412854	0.0430647
1.47504	2.46919	0.617138		1.47515	-0.078827	0.0104346		1.47475	-0.433119	0.0312341		1.47562	-0.117035	0.0258008		1.47508	-0.414008	0.0429851
1.47587	2.46991	0.617165		1.47599	-0.079101	0.0104274		1.47558	-0.433983	0.0311788		1.47645	-0.117966	0.0257333		1.47591	-0.414456	0.0429543
1.4767	2.4702	0.617175		1.47682	-0.079786	0.0104092		1.47641	-0.435047	0.0311107		1.47728	-0.118501	0.0256945		1.47674	-0.414926	0.0429219
1.47754	2.47101	0.617205		1.47765	-0.081299	0.010369		1.47724	-0.435689	0.0310696		1.47812	-0.118396	0.0257021		1.47757	-0.415051	0.0429133
1.47837	2.4718	0.617234		1.47848	-0.081771	0.0103565		1.47808	-0.436203	0.0310367		1.47895	-0.119682	0.0256089		1.4784	-0.413324	0.0430323
1.4792	2.47302	0.61728		1.47931	-0.081782	0.0103562		1.47891	-0.436509	0.0310171		1.47978	-0.120434	0.0255544		1.47924	-0.412634	0.0430798
1.48003	2.47477	0.617344		1.48015	-0.082372	0.0103405		1.47974	-0.436183	0.031038		1.48061	-0.120517	0.0255484		1.48007	-0.412889	0.0430622
1.48086	2.47562	0.617376		1.48098	-0.082862	0.0103275		1.48057	-0.436797	0.0309987		1.48144	-0.120464	0.0255522		1.4809	-0.412756	0.0430714
1.48169	2.476	0.61739		1.48181	-0.083623	0.0103073		1.4814	-0.43829	0.0309031		1.48228	-0.121123	0.0255045		1.48173	-0.41314	0.043045
1.48253	2.47722	0.617435		1.48264	-0.083444	0.010312		1.48223	-0.439247	0.0308418		1.48311	-0.121752	0.0254589		1.48256	-0.413369	0.0430292
1.48336	2.47715	0.617433		1.48347	-0.082697	0.0103319		1.48307	-0.439856	0.0308028		1.48394	-0.121789	0.0254562		1.4834	-0.413219	0.0430395
1.48419	2.47792	0.617461		1.48431	-0.084174	0.0102927		1.4839	-0.439873	0.0308017		1.48477	-0.122176	0.0254281		1.48423	-0.413616	0.0430122
1.48502	2.47952	0.617521		1.48514	-0.086374	0.0102342		1.48473	-0.438757	0.0308732		1.48561	-0.123455	0.0253354		1.48506	-0.415343	0.0428932
1.48585	2.48254	0.617632		1.48597	-0.087287	0.01021		1.48556	-0.438135	0.030913		1.48644	-0.124556	0.0252556		1.48589	-0.417176	0.0427668
1.48669	2.48312	0.617654		1.4868	-0.087119	0.0102145		1.48639	-0.43848	0.0308909		1.48727	-0.124471	0.0252618		1.48673	-0.418319	0.0426881
1.48752	2.4832	0.617657		1.48763	-0.08878	0.0101704		1.48723	-0.440761	0.0307448		1.4881	-0.123793	0.0253109		1.48756	-0.418364	0.042685
1.48835	2.48217	0.617619		1.48847	-0.08931	0.0101563		1.48806	-0.441359	0.0307066		1.48894	-0.12435	0.0252706		1.48839	-0.418491	0.0426762
1.48918	2.48233	0.617624		1.4893	-0.090502	0.0101246		1.48889	-0.441639	0.0306886		1.48977	-0.124821	0.0252364		1.48922	-0.419139	0.0426316
1.49002	2.48238	0.617626		1.49013	-0.092491	0.0100718		1.48972	-0.4418	0.0306783		1.4906	-0.124979	0.025225		1.49005	-0.419831	0.0425839
1.49085	2.48364	0.617673		1.49096	-0.094423	0.0100205		1.49055	-0.441459	0.0307002		1.49143	-0.125622	0.0251784		1.49089	-0.420948	0.0425069
1.49168	2.48465	0.61771		1.49179	-0.095062	0.0100035		1.49138	-0.441748	0.0306816		1.49226	-0.125411	0.0251936		1.49172	-0.421826	0.0424464
1.49251	2.48457	0.617708		1.49263	-0.095296	0.00999733		1.49222	-0.44128	0.0307116		1.4931	-0.124369	0.0252692		1.49255	-0.422629	0.0423911
1.49334	2.48517	0.61773		1.49346	-0.095262	0.00999823		1.49305	-0.441149	0.03072		1.49393	-0.123197	0.0253541		1.49338	-0.422433	0.0424046
1.49418	2.48459	0.617708		1.49429	-0.095403	0.00999448		1.49388	-0.442972	0.0306033		1.49476	-0.122094	0.0254341		1.49421	-0.422183	0.0424218
1.49501	2.48397	0.617685		1.49512	-0.095295	0.00999735		1.49471	-0.443445	0.030573		1.49559	-0.120984	0.0255145		1.49504	-0.422169	0.0424228
1.49584	2.48371	0.617676		1.49595	-0.096511	0.00996506		1.49554	-0.443291	0.0305829		1.49643	-0.120444	0.0255537		1.49588	-0.422849	0.0423759
1.49667	2.48339	0.617664		1.49679	-0.095892	0.0099815		1.49638	-0.441991	0.0306661		1.49726	-0.120747	0.0255317		1.49671	-0.423733	0.042315
1.4975	2.48267	0.617637		1.49762	-0.096321	0.00997011		1.49721	-0.440435	0.0307657		1.49809	-0.120992	0.025514		1.49754	-0.423352	0.0423413
1.49833	2.48232	0.617624		1.49845	-0.096143	0.00997483		1.49804	-0.438618	0.0308821		1.49892	-0.120898	0.0255208		1.49837	-0.423396	0.0423382
1.49917	2.48255	0.617632		1.49928	-0.095748	0.00998532		1.49887	-0.437977	0.0309231		1.49975	-0.120931	0.0255184		1.4992	-0.424966	0.0422301
1.5	2.48151	0.617594		1.50011	-0.095408	0.00999435		1.4997	-0.437703	0.0309406		1.50059	-0.121826	0.0254535		1.50004	-0.42538	0.0422015
1.50083	2.48054	0.617558		1.50095	-0.094699	0.0100132		1.50053	-0.437875	0.0309296		1.50142	-0.122654	0.0253935		1.50087	-0.425009	0.0422271
1.50166	2.48023	0.617547		1.50178	-0.094379	0.0100217		1.50137	-0.437274	0.0309681		1.50225	-0.123161	0.0253567		1.5017	-0.424686	0.0422494
1.50249	2.47931	0.617513		1.50261	-0.09439	0.0100214		1.5022	-0.436883	0.0309931		1.50308	-0.123175	0.0253557		1.50253	-0.424676	0.04225
1.50333	2.47847	0.617482		1.50344	-0.094927	0.0100071		1.50303	-0.436465	0.0310199		1.50392	-0.122925	0.0253738		1.50336	-0.424656	0.0422514
1.50416	2.47865	0.617488		1.50427	-0.095485	0.00999231		1.50386	-0.435942	0.0310534		1.50475	-0.122799	0.025383		1.5042	-0.424225	0.0422811
1.50499	2.47835	0.617477		1.50511	-0.096022	0.00997805		1.50469	-0.437034	0.0309835		1.50558	-0.122413	0.025411		1.50503	-0.424057	0.0422927
1.50582	2.47691	0.617424		1.50594	-0.096391	0.00996825		1.50553	-0.438305	0.0309021		1.50641	-0.121813	0.0254545		1.50586	-0.423625	0.0423225
1.50665	2.47437	0.61733		1.50677	-0.096999	0.0099521		1.50636	-0.438048	0.0309186		1.50725	-0.12182	0.0254539		1.50669	-0.424013	0.0422957
1.50749	2.47199	0.617241		1.5076	-0.098221	0.00991965		1.50719	-0.438866	0.0308662		1.50808	-0.122145	0.0254304		1.50752	-0.42443	0.042267
1.50832	2.47293	0.617276		1.50843	-0.098823	0.00990367		1.50802	-0.438251	0.0309056		1.50891	-0.122515	0.0254036		1.50836	-0.425297	0.0422073
1.50915	2.4748	0.617346		1.50927	-0.098742	0.00990582		1.50885	-0.438209	0.0309082		1.50974	-0.121959	0.0254439		1.50919	-0.426212	0.0421442
1.50998	2.476	0.61739		1.5101	-0.099428	0.0098876		1.50968	-0.438335	0.0309002		1.51058	-0.121787	0.0254563		1.51002	-0.425615	0.0421853
1.51081	2.47697	0.617426		1.51093	-0.098784	0.0099047		1.51052	-0.438645	0.0308803		1.51141	-0.122702	0.02539		1.51085	-0.425053	0.0422241
1.51165	2.47672	0.617417		1.51176	-0.097744	0.00993232		1.51135	-0.43892	0.0308627		1.51224	-0.123328	0.0253446		1.51168	-0.424697	0.0422486
1.51248	2.47651	0.617409		1.51259	-0.09766	0.00993455		1.51218	-0.438778	0.0308718		1.51307	-0.123998	0.0252961		1.51252	-0.424481	0.0422635
1.51331	2.47541	0.617368		1.51343	-0.097914	0.00992781		1.51301	-0.437975	0.0309232		1.5139	-0.124885	0.0252318		1.51335	-0.424136	0.0422873
1.51414	2.47517	0.617359		1.51426	-0.098469	0.00991307		1.51384	-0.438009	0.030921		1.51474	-0.125511	0.0251864		1.51418	-0.423924	0.0423019
1.51497	2.47642	0.617405		1.51509	-0.09928	0.00989153		1.51467	-0.438188	0.0309096		1.51557	-0.126194	0.0251369		1.51501	-0.424524	0.0422605
1.51581	2.47623	0.617399		1.51592	-0.100523	0.00985853		1.51551	-0.437688	0.0309416		1.5164	-0.126577	0.0251091		1.51584	-0.425115	0.0422198
1.51664	2.47632	0.617402		1.51675	-0.101131	0.00984238		1.51634	-0.436234	0.0310347		1.51723	-0.126779	0.0250945		1.51668	-0.424825	0.0422398
1.51747	2.47572	0.61738		1.51759	-0.102808	0.00979785		1.51717	-0.436261	0.031033		1.51806	-0.126478	0.0251163		1.51751	-0.424218	0.0422816
1.5183	2.4764	0.617405		1.51842	-0.101444	0.00983407		1.518	-0.437734	0.0309387		1.5189	-0.126541	0.0251117		1.51834	-0.424114	0.0422888
1.51913	2.47617	0.617396		1.51925	-0.101573	0.00983064		1.51883	-0.439378	0.0308334		1.51973	-0.127155	0.0250672		1.51917	-0.423458	0.042334
1.51997	2.47566	0.617377		1.52008	-0.1033	0.00978479		1.51967	-0.44061	0.0307545		1.52056	-0.126714	0.0250992		1.52	-0.42367	0.0423194
1.5208	2.47634	0.617402		1.52091	-0.104776	0.00974559		1.5205	-0.441821	0.030677		1.52139	-0.12648	0.0251162		1.52084	-0.424534	0.0422598
1.52163	2.47601	0.617391		1.52175	-0.106292	0.00970534		1.52133	-0.441754	0.0306813		1.52223	-0.126742	0.0250972		1.52167	-0.424939	0.0422319
1.52246	2.47469	0.617342		1.52258	-0.107474	0.00967395		1.52216	-0.442586	0.030628		1.52306	-0.126592	0.025108		1.5225	-0.425121	0.0422194
1.52329	2.47472	0.617343		1.52341	-0.108115	0.00965693		1.52299	-0.443271	0.0305841		1.52389	-0.126177	0.0251381		1.52333	-0.424252	0.0422793
1.52412	2.47412	0.617321		1.52424	-0.108276	0.00965265		1.52382	-0.443517	0.0305684		1.52472	-0.125212	0.0252081		1.52416	-0.423386	0.0423389
1.52496	2.47296	0.617278		1.52507	-0.109304	0.00962535		1.52466	-0.443191	0.0305893		1.52556	-0.124299	0.0252743		1.525	-0.42318	0.0423531
1.52579	2.47337	0.617293		1.52591	-0.110074	0.00960491		1.52549	-0.442274	0.030648		1.52639	-0.124458	0.0252627		1.52583	-0.423128	0.0423567
1.52662	2.475	0.617353		1.52674	-0.110159	0.00960265		1.52632	-0.44219	0.0306533		1.52722	-0.124642	0.0252494		1.52666	-0.423142	0.0423557
1.52745	2.47641	0.617405		1.52757	-0.109346	0.00962424		1.52715	-0.442683	0.0306218		1.52805	-0.124866	0.0252332		1.52749	-0.422919	0.0423711
1.52828	2.47728	0.617438		1.5284	-0.1092	0.00962812		1.52798	-0.443297	0.0305825		1.52889	-0.124766	0.0252404		1.52832	-0.423674	0.0423191
1.52912	2.47615	0.617396		1.52923	-0.107393	0.0096761		1.52882	-0.4446	0.030499		1.52972	-0.124406	0.0252665		1.52916	-0.42496	0.0422305
1.52995	2.47629	0.617401		1.53007	-0.109073	0.00963149		1.52965	-0.445006	0.030473		1.53055	-0.1249	0.0252307		1.52999	-0.425138	0.0422182
1.53078	2.47516	0.617359		1.5309	-0.1106	0.00959094		1.53048	-0.444473	0.0305072		1.53138	-0.124807	0.0252374		1.53082	-0.424826	0.0422397
1.53161	2.47471	0.617342		1.53173	-0.111432	0.00956885		1.53131	-0.444233	0.0305225		1.53221	-0.1239	0.0253032		1.53165	-0.424783	0.0422427
1.53244	2.47423	0.617325		1.53256	-0.11077	0.00958643		1.53214	-0.444826	0.0304846		1.53305	-0.12263	0.0253952		1.53248	-0.424463	0.0422647
1.53328	2.47386	0.617311		1.53339	-0.111393	0.00956988		1.53297	-0.444862	0.0304823		1.53388	-0.122083	0.0254349		1.53331	-0.424175	0.0422846
1.53411	2.47431	0.617328		1.53423	-0.112266	0.0095467		1.53381	-0.445499	0.0304415		1.53471	-0.122917	0.0253744		1.53415	-0.42522	0.0422126
1.53494	2.47508	0.617356		1.53506	-0.113788	0.00950629		1.53464	-0.445925	0.0304142		1.53554	-0.123563	0.0253276		1.53498	-0.425638	0.0421838
1.53577	2.47536	0.617366		1.53589	-0.114098	0.00949805		1.53547	-0.445831	0.0304202		1.53638	-0.124039	0.0252931		1.53581	-0.424574	0.0422571
1.5366	2.47551	0.617372		1.53672	-0.114769	0.00948024		1.5363	-0.445856	0.0304186		1.53721	-0.125448	0.025191		1.53664	-0.424103	0.0422895
1.53744	2.47514	0.617358		1.53755	-0.114084	0.00949843		1.53713	-0.446917	0.0303507		1.53804	-0.126797	0.0250932		1.53747	-0.424442	0.0422662
1.53827	2.47503	0.617354		1.53839	-0.114854	0.00947798		1.53797	-0.448491	0.0302499		1.53887	-0.127379	0.025051		1.53831	-0.42495	0.0422312
1.5391	2.47433	0.617328		1.53922	-0.116358	0.00943804		1.5388	-0.447787	0.030295		1.5397	-0.12762	0.0250335		1.53914	-0.426941	0.042094
1.53993	2.47415	0.617322		1.54005	-0.116454	0.00943549		1.53963	-0.447098	0.0303391		1.54054	-0.12803	0.0250038		1.53997	-0.429557	0.0419137
1.54076	2.47479	0.617345		1.54088	-0.116405	0.00943679		1.54046	-0.446512	0.0303766		1.54137	-0.129023	0.0249318		1.5408	-0.430098	0.0418764
1.5416	2.47447	0.617334		1.54171	-0.115656	0.00945668		1.54129	-0.445257	0.030457		1.5422	-0.128936	0.0249381		1.54164	-0.430114	0.0418753
1.54243	2.47526	0.617363		1.54255	-0.115166	0.00946969		1.54212	-0.445199	0.0304607		1.54303	-0.127978	0.0250076		1.54247	-0.43018	0.0418708
1.54326	2.47726	0.617437		1.54338	-0.115709	0.00945528		1.54296	-0.445781	0.0304234		1.54387	-0.127807	0.02502		1.5433	-0.4307	0.041835
1.54409	2.47696	0.617426		1.54421	-0.116064	0.00944585		1.54379	-0.446833	0.0303561		1.5447	-0.127853	0.0250166		1.54413	-0.432759	0.0416931
1.54492	2.47653	0.61741		1.54504	-0.116521	0.00943371		1.54462	-0.446835	0.0303559		1.54553	-0.128819	0.0249466		1.54496	-0.434445	0.0415769
1.54575	2.47649	0.617408		1.54587	-0.116258	0.0094407		1.54545	-0.447437	0.0303174		1.54636	-0.129465	0.0248998		1.5458	-0.436651	0.0414249
1.54659	2.47627	0.6174		1.54671	-0.114881	0.00947726		1.54628	-0.44743	0.0303178		1.5472	-0.128926	0.0249389		1.54663	-0.43798	0.0413333
1.54742	2.47628	0.617401		1.54754	-0.11442	0.0094895		1.54711	-0.447969	0.0302833		1.54803	-0.128402	0.0249768		1.54746	-0.438922	0.0412684
1.54825	2.47581	0.617383		1.54837	-0.114993	0.00947429		1.54795	-0.449054	0.0302139		1.54886	-0.127917	0.025012		1.54829	-0.439686	0.0412158
1.54908	2.47513	0.617358		1.5492	-0.114553	0.00948597		1.54878	-0.448883	0.0302248		1.54969	-0.127066	0.0250737		1.54912	-0.438931	0.0412678
1.54991	2.47551	0.617372		1.55003	-0.114989	0.00947439		1.54961	-0.446068	0.030405		1.55052	-0.127836	0.0250179		1.54995	-0.439295	0.0412427
1.55075	2.47551	0.617372		1.55087	-0.113852	0.00950459		1.55044	-0.446787	0.030359		1.55136	-0.127235	0.0250614		1.55079	-0.440021	0.0411927
1.55158	2.4761	0.617394		1.5517	-0.112446	0.00954192		1.55127	-0.44877	0.030232		1.55219	-0.126352	0.0251254		1.55162	-0.440764	0.0411415
1.55241	2.47551	0.617372		1.55253	-0.111846	0.00955785		1.55211	-0.450171	0.0301423		1.55302	-0.127583	0.0250362		1.55245	-0.442101	0.0410494
1.55324	2.47512	0.617357		1.55336	-0.11186	0.00955748		1.55294	-0.451416	0.0300626		1.55385	-0.129847	0.0248721		1.55328	-0.443946	0.0409222
1.55408	2.47603	0.617391		1.55419	-0.112456	0.00954166		1.55377	-0.452063	0.0300212		1.55469	-0.130931	0.0247935		1.55411	-0.445181	0.0408371
1.55491	2.47734	0.61744		1.55503	-0.113249	0.0095206		1.5546	-0.45298	0.0299625		1.55552	-0.130465	0.0248273		1.55495	-0.445571	0.0408102
1.55574	2.47745	0.617444		1.55586	-0.113122	0.00952397		1.55543	-0.453045	0.0299583		1.55635	-0.129689	0.0248835		1.55578	-0.446353	0.0407564
1.55657	2.47707	0.61743		1.55669	-0.112867	0.00953074		1.55626	-0.453399	0.0299357		1.55718	-0.129503	0.024897		1.55661	-0.448424	0.0406137
1.5574	2.47823	0.617473		1.55752	-0.112366	0.00954405		1.5571	-0.454263	0.0298803		1.55801	-0.128756	0.0249512		1.55744	-0.449861	0.0405146
1.55823	2.47874	0.617491		1.55835	-0.1123	0.0095458		1.55793	-0.454103	0.0298906		1.55885	-0.127553	0.0250384		1.55827	-0.450669	0.040459
1.55907	2.48	0.617538		1.55919	-0.111518	0.00956656		1.55876	-0.453571	0.0299246		1.55968	-0.126878	0.0250873		1.55911	-0.451389	0.0404093
1.5599	2.4807	0.617564		1.56002	-0.111115	0.00957727		1.55959	-0.453966	0.0298993		1.56051	-0.126076	0.0251454		1.55994	-0.450608	0.0404632
1.56073	2.48114	0.61758		1.56085	-0.110529	0.00959283		1.56042	-0.454368	0.0298736		1.56134	-0.125234	0.0252065		1.56077	-0.44954	0.0405368
1.56156	2.48148	0.617593		1.56168	-0.109472	0.00962089		1.56126	-0.453853	0.0299066		1.56218	-0.125043	0.0252203		1.5616	-0.448551	0.0406049
1.56239	2.48174	0.617602		1.56252	-0.109142	0.00962966		1.56209	-0.454862	0.029842		1.56301	-0.124464	0.0252623		1.56243	-0.44786	0.0406525
1.56323	2.4822	0.61762		1.56335	-0.109643	0.00961635		1.56292	-0.456551	0.0297338		1.56384	-0.125321	0.0252002		1.56327	-0.448769	0.0405899
1.56406	2.48201	0.617613		1.56418	-0.109511	0.00961986		1.56375	-0.455446	0.0298046		1.56467	-0.126262	0.025132		1.5641	-0.450236	0.0404888
1.56489	2.48229	0.617623		1.56501	-0.108533	0.00964583		1.56458	-0.454128	0.029889		1.5655	-0.12713	0.025069		1.56493	-0.450556	0.0404667
1.56572	2.48238	0.617626		1.56584	-0.107183	0.00968168		1.56541	-0.453701	0.0299163		1.56634	-0.12721	0.0250632		1.56576	-0.450245	0.0404882
1.56655	2.48251	0.617631		1.56668	-0.106428	0.00970172		1.56625	-0.452814	0.0299731		1.56717	-0.127158	0.025067		1.56659	-0.449517	0.0405383
1.56739	2.48201	0.617613		1.56751	-0.106467	0.00970069		1.56708	-0.453609	0.0299222		1.568	-0.128273	0.0249862		1.56743	-0.448139	0.0406333
1.56822	2.48135	0.617588		1.56834	-0.107071	0.00968465		1.56791	-0.453631	0.0299208		1.56883	-0.128423	0.0249753		1.56826	-0.447406	0.0406838
1.56905	2.48177	0.617604		1.56917	-0.107258	0.00967968		1.56874	-0.452747	0.0299774		1.56967	-0.1283	0.0249842		1.56909	-0.446055	0.0407769
1.56988	2.48263	0.617635		1.57	-0.107656	0.00966912		1.56957	-0.451842	0.0300353		1.5705	-0.128883	0.024942		1.56992	-0.446249	0.0407635
1.57071	2.48162	0.617598		1.57083	-0.108492	0.00964692		1.5704	-0.452527	0.0299915		1.57133	-0.129655	0.024886		1.57075	-0.446489	0.040747
1.57155	2.4816	0.617598		1.57167	-0.11016	0.00960262		1.57124	-0.452462	0.0299956		1.57216	-0.13083	0.0248008		1.57159	-0.445397	0.0408222
1.57238	2.48167	0.6176		1.5725	-0.110511	0.0095933		1.57207	-0.450925	0.0300941		1.57299	-0.131928	0.0247212		1.57242	-0.445055	0.0408458
1.57321	2.48231	0.617624		1.57333	-0.111426	0.00956901		1.5729	-0.450994	0.0300896		1.57383	-0.13196	0.0247189		1.57325	-0.445755	0.0407976
1.57404	2.48314	0.617655		1.57416	-0.112703	0.0095351		1.57373	-0.449851	0.0301628		1.57466	-0.130712	0.0248094		1.57408	-0.446028	0.0407788
1.57487	2.48254	0.617632		1.57499	-0.112303	0.00954572		1.57456	-0.450041	0.0301507		1.57549	-0.129457	0.0249004		1.57491	-0.446273	0.0407619
1.5757	2.4815	0.617594		1.57583	-0.111215	0.00957461		1.5754	-0.449556	0.0301817		1.57632	-0.129189	0.0249198		1.57574	-0.447362	0.0406868
1.57654	2.48126	0.617585		1.57666	-0.110299	0.00959893		1.57623	-0.450954	0.0300922		1.57716	-0.129692	0.0248833		1.57658	-0.447847	0.0406534
1.57737	2.48159	0.617597		1.57749	-0.110687	0.00958863		1.57706	-0.450923	0.0300942		1.57799	-0.129382	0.0249058		1.57741	-0.447811	0.0406559
1.5782	2.48065	0.617562		1.57832	-0.112243	0.00954731		1.57789	-0.450293	0.0301345		1.57882	-0.1293	0.0249117		1.57824	-0.447556	0.0406735
1.57903	2.4798	0.617531		1.57916	-0.113634	0.00951038		1.57872	-0.450966	0.0300914		1.57965	-0.129567	0.0248924		1.57907	-0.44757	0.0406725
1.57987	2.47896	0.6175		1.57999	-0.114838	0.0094784		1.57955	-0.451754	0.030041		1.58049	-0.13001	0.0248603		1.5799	-0.44672	0.0407311
1.5807	2.47955	0.617522		1.58082	-0.11608	0.00944542		1.58038	-0.45102	0.030088		1.58132	-0.131116	0.0247801		1.58074	-0.446298	0.0407601
1.58153	2.47948	0.617519		1.58165	-0.11694	0.00942259		1.58122	-0.450928	0.0300939		1.58215	-0.13163	0.0247428		1.58157	-0.446986	0.0407127
1.58236	2.47912	0.617506		1.58248	-0.117609	0.00940482		1.58205	-0.453262	0.0299444		1.58298	-0.130961	0.0247913		1.5824	-0.447544	0.0406743
1.58319	2.47981	0.617531		1.58332	-0.118094	0.00939194		1.58288	-0.452592	0.0299873		1.58381	-0.130376	0.0248337		1.58323	-0.447492	0.0406779
1.58403	2.4792	0.617509		1.58415	-0.118726	0.00937516		1.58371	-0.451546	0.0300543		1.58465	-0.129887	0.0248692		1.58407	-0.447512	0.0406765
1.58486	2.47896	0.6175		1.58498	-0.120012	0.00934101		1.58454	-0.451873	0.0300334		1.58548	-0.128743	0.0249521		1.5849	-0.446832	0.0407234
1.58569	2.47931	0.617513		1.58581	-0.121142	0.00931101		1.58538	-0.451558	0.0300535		1.58631	-0.128283	0.0249855		1.58573	-0.445896	0.0407878
1.58652	2.47971	0.617527		1.58664	-0.123073	0.00925973		1.58621	-0.451584	0.0300519		1.58714	-0.12978	0.0248769		1.58656	-0.446436	0.0407506
1.58735	2.48007	0.617541		1.58747	-0.12524	0.00920219		1.58704	-0.451574	0.0300525		1.58798	-0.131404	0.0247592		1.58739	-0.447401	0.0406841
1.58818	2.48	0.617538		1.58831	-0.125754	0.00918854		1.58787	-0.450337	0.0301317		1.58881	-0.132355	0.0246903		1.58822	-0.448156	0.0406321
1.58902	2.47975	0.617529		1.58914	-0.125277	0.0092012		1.5887	-0.450117	0.0301458		1.58964	-0.13344	0.0246116		1.58906	-0.449119	0.0405658
1.58985	2.47899	0.617501		1.58997	-0.126528	0.00916799		1.58953	-0.450005	0.030153		1.59047	-0.134314	0.0245483		1.58989	-0.45028	0.0404858
1.59068	2.47912	0.617506		1.5908	-0.127137	0.00915181		1.59037	-0.450462	0.0301237		1.5913	-0.134299	0.0245494		1.59072	-0.450304	0.0404841
1.59151	2.47986	0.617533		1.59163	-0.12739	0.0091451		1.5912	-0.451965	0.0300275		1.59214	-0.134071	0.0245659		1.59155	-0.450097	0.0404984
1.59234	2.47872	0.617491		1.59247	-0.127839	0.00913317		1.59203	-0.451242	0.0300738		1.59297	-0.133722	0.0245912		1.59238	-0.450628	0.0404618
1.59318	2.47796	0.617463		1.5933	-0.128024	0.00912826		1.59286	-0.452513	0.0299924		1.5938	-0.132467	0.0246822		1.59322	-0.451059	0.0404321
1.59401	2.47745	0.617444		1.59413	-0.12799	0.00912916		1.59369	-0.451684	0.0300455		1.59463	-0.131074	0.0247832		1.59405	-0.450782	0.0404512
1.59484	2.47616	0.617396		1.59496	-0.128371	0.00911905		1.59453	-0.452792	0.0299745		1.59547	-0.130665	0.0248128		1.59488	-0.450019	0.0405037
1.59567	2.47593	0.617387		1.5958	-0.128701	0.00911028		1.59536	-0.452352	0.0300027		1.5963	-0.131025	0.0247867		1.59571	-0.448997	0.0405742
1.5965	2.47589	0.617386		1.59663	-0.128912	0.00910468		1.59619	-0.454434	0.0298694		1.59713	-0.131187	0.024775		1.59655	-0.448371	0.0406173
1.59734	2.47544	0.617369		1.59746	-0.129273	0.00909509		1.59702	-0.453028	0.0299594		1.59796	-0.130321	0.0248377		1.59738	-0.448791	0.0405884
1.59817	2.47548	0.617371		1.59829	-0.128932	0.00910415		1.59785	-0.451605	0.0300505		1.5988	-0.129957	0.0248641		1.59821	-0.448869	0.040583
1.599	2.47642	0.617406		1.59912	-0.128651	0.00911161		1.59868	-0.452095	0.0300191		1.59963	-0.129999	0.0248611		1.59904	-0.44862	0.0406001
1.59983	2.47561	0.617376		1.59996	-0.128311	0.00912064		1.59952	-0.452523	0.0299917		1.60046	-0.12953	0.0248951		1.59987	-0.448506	0.040608
1.60066	2.47512	0.617357		1.60079	-0.12865	0.00911164		1.60035	-0.452337	0.0300037		1.60129	-0.128965	0.024936		1.6007	-0.449654	0.0405289
1.6015	2.47505	0.617355		1.60162	-0.129189	0.00909733		1.60118	-0.453721	0.029915		1.60213	-0.128648	0.024959		1.60154	-0.450984	0.0404373
1.60233	2.47441	0.617331		1.60245	-0.129275	0.00909504		1.60201	-0.453755	0.0299129		1.60296	-0.128952	0.024937		1.60237	-0.450812	0.0404491
1.60316	2.47407	0.617319		1.60328	-0.129938	0.00907744		1.60284	-0.451267	0.0300722		1.60379	-0.130104	0.0248535		1.6032	-0.451427	0.0404067
1.60399	2.47299	0.617279		1.60411	-0.130811	0.00905425		1.60367	-0.451754	0.030041		1.60462	-0.131605	0.0247447		1.60403	-0.452922	0.0403037
1.60482	2.47221	0.61725		1.60495	-0.131093	0.00904677		1.60451	-0.451389	0.0300644		1.60545	-0.131851	0.0247268		1.60486	-0.452889	0.040306
1.60566	2.47266	0.617266		1.60578	-0.130679	0.00905776		1.60534	-0.45065	0.0301117		1.60629	-0.132096	0.0247091		1.6057	-0.452821	0.0403107
1.60649	2.47244	0.617258		1.60661	-0.131135	0.00904565		1.60617	-0.450566	0.030117		1.60712	-0.133055	0.0246396		1.60653	-0.453944	0.0402333
1.60732	2.4723	0.617253		1.60744	-0.131821	0.00902743		1.607	-0.449844	0.0301633		1.60795	-0.132299	0.0246944		1.60736	-0.454479	0.0401964
1.60815	2.47207	0.617245		1.60827	-0.13119	0.00904419		1.60783	-0.450475	0.0301229		1.60878	-0.131318	0.0247655		1.60819	-0.454897	0.0401676
1.60898	2.47208	0.617245		1.60911	-0.131303	0.00904119		1.60867	-0.452007	0.0300248		1.60962	-0.13042	0.0248306		1.60902	-0.455463	0.0401286
1.60981	2.47266	0.617266		1.60994	-0.131547	0.00903471		1.6095	-0.452035	0.030023		1.61045	-0.130358	0.0248351		1.60986	-0.455813	0.0401045
1.61065	2.47349	0.617297		1.61077	-0.130842	0.00905343		1.61033	-0.453052	0.0299579		1.61128	-0.130358	0.0248351		1.61069	-0.456871	0.0400316
1.61148	2.47387	0.617311		1.6116	-0.130755	0.00905574		1.61116	-0.454109	0.0298902		1.61211	-0.130786	0.024804		1.61152	-0.458169	0.0399422
1.61231	2.47438	0.61733		1.61244	-0.130676	0.00905784		1.61199	-0.453122	0.0299534		1.61294	-0.130945	0.0247925		1.61235	-0.458616	0.0399114
1.61314	2.47551	0.617372		1.61327	-0.130429	0.0090644		1.61282	-0.451808	0.0300375		1.61378	-0.130837	0.0248003		1.61318	-0.459336	0.0398617
1.61397	2.47576	0.617381		1.6141	-0.131493	0.00903614		1.61366	-0.450827	0.0301003		1.61461	-0.130746	0.0248069		1.61402	-0.459764	0.0398323
1.61481	2.47646	0.617407		1.61493	-0.132066	0.00902093		1.61449	-0.450583	0.030116		1.61544	-0.132041	0.0247131		1.61485	-0.459605	0.0398432
1.61564	2.47771	0.617453		1.61576	-0.131409	0.00903837		1.61532	-0.450589	0.0301156		1.61627	-0.133185	0.0246301		1.61568	-0.459588	0.0398444
1.61647	2.47856	0.617485		1.6166	-0.129763	0.00908208		1.61615	-0.450449	0.0301245		1.61711	-0.134008	0.0245705		1.61651	-0.459962	0.0398186
1.6173	2.47932	0.617513		1.61743	-0.129405	0.00909159		1.61698	-0.44957	0.0301808		1.61794	-0.13393	0.0245761		1.61734	-0.46005	0.0398125
1.61814	2.48034	0.617551		1.61826	-0.130145	0.00907194		1.61782	-0.450134	0.0301447		1.61877	-0.13348	0.0246087		1.61818	-0.459942	0.03982
1.61897	2.48006	0.61754		1.61909	-0.130456	0.00906368		1.61865	-0.451287	0.0300709		1.6196	-0.134504	0.0245345		1.61901	-0.460293	0.0397958
1.6198	2.47939	0.617516		1.61992	-0.130164	0.00907143		1.61948	-0.451395	0.030064		1.62044	-0.13508	0.0244928		1.61984	-0.459967	0.0398183
1.62063	2.48062	0.617561		1.62075	-0.130144	0.00907197		1.62031	-0.451493	0.0300577		1.62127	-0.136296	0.0244046		1.62067	-0.459437	0.0398548
1.62146	2.48166	0.6176		1.62159	-0.12929	0.00909464		1.62114	-0.451753	0.030041		1.6221	-0.137354	0.0243279		1.6215	-0.459748	0.0398334
1.62229	2.48135	0.617588		1.62242	-0.128709	0.00911007		1.62197	-0.451515	0.0300563		1.62293	-0.13814	0.024271		1.62234	-0.45889	0.0398925
1.62313	2.48176	0.617603		1.62325	-0.128463	0.0091166		1.62281	-0.452449	0.0299965		1.62376	-0.138528	0.0242428		1.62317	-0.459412	0.0398565
1.62396	2.48333	0.617661		1.62408	-0.127753	0.00913546		1.62364	-0.452694	0.0299808		1.6246	-0.138483	0.0242461		1.624	-0.460188	0.039803
1.62479	2.485	0.617724		1.62492	-0.127331	0.00914666		1.62447	-0.451827	0.0300363		1.62543	-0.138787	0.0242241		1.62483	-0.459912	0.0398221
1.62562	2.48571	0.61775		1.62575	-0.126763	0.00916175		1.6253	-0.452468	0.0299953		1.62626	-0.139454	0.0241757		1.62566	-0.460203	0.039802
1.62645	2.48559	0.617745		1.62658	-0.12621	0.00917643		1.62613	-0.45394	0.029901		1.62709	-0.140309	0.0241137		1.6265	-0.459975	0.0398177
1.62729	2.48577	0.617752		1.62741	-0.126414	0.00917101		1.62696	-0.455563	0.0297971		1.62793	-0.139582	0.0241664		1.62733	-0.459583	0.0398447
1.62812	2.48556	0.617744		1.62824	-0.12598	0.00918254		1.6278	-0.457125	0.0296971		1.62876	-0.138966	0.0242111		1.62816	-0.458766	0.039901
1.62895	2.48557	0.617744		1.62908	-0.12625	0.00917537		1.62863	-0.456675	0.0297259		1.62959	-0.138887	0.0242168		1.62899	-0.457685	0.0399755
1.62978	2.48574	0.617751		1.62991	-0.12641	0.00917112		1.62946	-0.457406	0.0296791		1.63042	-0.138921	0.0242143		1.62982	-0.456751	0.0400399
1.63061	2.48501	0.617724		1.63074	-0.127031	0.00915463		1.63029	-0.458444	0.0296126		1.63125	-0.138893	0.0242164		1.63065	-0.456265	0.0400734
1.63145	2.48378	0.617678		1.63157	-0.126912	0.00915779		1.63112	-0.458197	0.0296284		1.63209	-0.138431	0.0242499		1.63149	-0.455746	0.0401091
1.63228	2.48313	0.617654		1.6324	-0.127441	0.00914374		1.63196	-0.45837	0.0296174		1.63292	-0.138365	0.0242546		1.63232	-0.454791	0.0401749
1.63311	2.48226	0.617622		1.63323	-0.128967	0.00910322		1.63279	-0.459678	0.0295336		1.63375	-0.138622	0.024236		1.63315	-0.454481	0.0401963
1.63394	2.48188	0.617608		1.63407	-0.128968	0.00910319		1.63362	-0.461955	0.0293878		1.63458	-0.139163	0.0241968		1.63398	-0.454412	0.040201
1.63477	2.48222	0.61762		1.6349	-0.127595	0.00913965		1.63445	-0.463086	0.0293154		1.63542	-0.139825	0.0241488		1.63481	-0.454484	0.0401961
1.6356	2.4816	0.617597		1.63573	-0.126724	0.00916278		1.63528	-0.462981	0.0293221		1.63625	-0.139779	0.0241522		1.63565	-0.454789	0.0401751
1.63644	2.4819	0.617609		1.63656	-0.127409	0.00914459		1.63611	-0.462937	0.029325		1.63708	-0.139564	0.0241677		1.63648	-0.454736	0.0401787
1.63727	2.4818	0.617605		1.6374	-0.129687	0.0090841		1.63695	-0.463578	0.0292839		1.63791	-0.139695	0.0241582		1.63731	-0.455162	0.0401494
1.6381	2.48088	0.617571		1.63823	-0.130231	0.00906966		1.63778	-0.463799	0.0292698		1.63874	-0.140522	0.0240983		1.63814	-0.454709	0.0401806
1.63893	2.48009	0.617541		1.63906	-0.131042	0.00904812		1.63861	-0.464071	0.0292523		1.63958	-0.141328	0.0240399		1.63898	-0.45505	0.0401571
1.63976	2.48032	0.61755		1.63989	-0.131655	0.00903184		1.63944	-0.463723	0.0292746		1.64041	-0.1415	0.0240274		1.63981	-0.455442	0.0401301
1.6406	2.48043	0.617554		1.64072	-0.132103	0.00901995		1.64027	-0.463724	0.0292746		1.64124	-0.141393	0.0240352		1.64064	-0.455981	0.0400929
1.64143	2.48068	0.617563		1.64156	-0.132643	0.00900561		1.64111	-0.464105	0.0292502		1.64207	-0.141383	0.0240359		1.64147	-0.456162	0.0400805
1.64226	2.48084	0.617569		1.64239	-0.132772	0.00900218		1.64194	-0.464223	0.0292426		1.64291	-0.141788	0.0240065		1.6423	-0.456208	0.0400773
1.64309	2.48079	0.617568		1.64322	-0.133474	0.00898354		1.64277	-0.464651	0.0292152		1.64374	-0.141619	0.0240188		1.64314	-0.456152	0.0400811
1.64393	2.48059	0.61756		1.64405	-0.134319	0.0089611		1.6436	-0.464469	0.0292269		1.64457	-0.141226	0.0240473		1.64397	-0.455845	0.0401023
1.64476	2.4785	0.617483		1.64488	-0.13488	0.00894621		1.64443	-0.465169	0.029182		1.6454	-0.141142	0.0240533		1.6448	-0.456044	0.0400886
1.64559	2.47742	0.617443		1.64572	-0.134791	0.00894857		1.64526	-0.466136	0.0291201		1.64623	-0.140724	0.0240836		1.64563	-0.457026	0.0400209
1.64642	2.47703	0.617428		1.64655	-0.135386	0.00893277		1.6461	-0.466697	0.0290842		1.64707	-0.140985	0.0240647		1.64646	-0.457749	0.0399711
1.64725	2.4765	0.617409		1.64738	-0.136709	0.00889764		1.64693	-0.466644	0.0290876		1.6479	-0.14115	0.0240528		1.64729	-0.458366	0.0399286
1.64809	2.47655	0.617411		1.64821	-0.137468	0.00887748		1.64776	-0.465745	0.0291452		1.64873	-0.141896	0.0239987		1.64813	-0.459225	0.0398694
1.64892	2.47712	0.617432		1.64904	-0.138165	0.00885897		1.64859	-0.465628	0.0291527		1.64956	-0.142394	0.0239626		1.64896	-0.460416	0.0397873
1.64975	2.47632	0.617402		1.64988	-0.139324	0.0088282		1.64942	-0.466246	0.0291131		1.6504	-0.142476	0.0239567		1.64979	-0.461718	0.0396976
1.65058	2.4761	0.617394		1.65071	-0.139924	0.00881227		1.65026	-0.465587	0.0291553		1.65123	-0.142632	0.0239453		1.65062	-0.462562	0.0396395
1.65141	2.47781	0.617457		1.65154	-0.139673	0.00881893		1.65109	-0.464672	0.0292139		1.65206	-0.143487	0.0238834		1.65145	-0.46283	0.039621
1.65224	2.47912	0.617505		1.65237	-0.140124	0.00880696		1.65192	-0.464997	0.0291931		1.65289	-0.144013	0.0238452		1.65229	-0.462298	0.0396576
1.65308	2.47896	0.6175		1.6532	-0.140759	0.00879009		1.65275	-0.46457	0.0292204		1.65373	-0.144003	0.023846		1.65312	-0.462297	0.0396577
1.65391	2.47884	0.617495		1.65404	-0.140004	0.00881014		1.65358	-0.463959	0.0292595		1.65456	-0.144133	0.0238365		1.65395	-0.463137	0.0395998
1.65474	2.47883	0.617495		1.65487	-0.139933	0.00881203		1.65441	-0.464355	0.0292342		1.65539	-0.144264	0.023827		1.65478	-0.464677	0.0394937
1.65557	2.47863	0.617488		1.6557	-0.140235	0.00880401		1.65525	-0.463657	0.0292789		1.65622	-0.143695	0.0238683		1.65561	-0.464795	0.0394856
1.6564	2.47848	0.617482		1.65653	-0.140646	0.00879309		1.65608	-0.463804	0.0292694		1.65705	-0.143963	0.0238489		1.65645	-0.465027	0.0394696
1.65724	2.47766	0.617452		1.65736	-0.141086	0.00878141		1.65691	-0.463416	0.0292943		1.65789	-0.143727	0.023866		1.65728	-0.465125	0.0394628
1.65807	2.4778	0.617457		1.6582	-0.14117	0.00877918		1.65774	-0.463316	0.0293007		1.65872	-0.144491	0.0238106		1.65811	-0.464701	0.0394921
1.6589	2.47909	0.617504		1.65903	-0.141582	0.00876824		1.65857	-0.46355	0.0292857		1.65955	-0.143928	0.0238514		1.65894	-0.464744	0.0394891
1.65973	2.47936	0.617514		1.65986	-0.141486	0.00877079		1.65941	-0.46184	0.0293952		1.66038	-0.144199	0.0238318		1.65977	-0.464085	0.0395345
1.66056	2.47876	0.617492		1.66069	-0.141215	0.00877798		1.66024	-0.461683	0.0294052		1.66122	-0.144522	0.0238083		1.66061	-0.463802	0.039554
[truncated: 35,450 more rows]

## Sheet: using previous LH control
Chrom.1				Chrom.1				Chrom.1				Chrom.1
LH				LH + MatPdelta18C				LH DDE-KKK				LH DDE-KKK + MatPdelta18C
ml	mAU	normalised mAU		ml	mAU	normalised mAU		ml	mAU	normalised mAU		ml	mAU	normalised mAU
0	0.019357	0.0551116		0	-0.008613	0.0584145		0	0.214022	0.0411037		0	0.082703	0.0772118
0.000832	-0.096774	0.0458413		0.000832	-0.135465	0.0502924		0.000832	2.25473	0.190383		0.000832	1.02087	0.141857
0.001664	-0.098009	0.0457427		0.001664	-0.137413	0.0501677		0.001665	2.23013	0.188583		0.001664	1.02058	0.141838
0.002496	-0.099176	0.0456495		0.002495	-0.139185	0.0500542		0.002497	2.20576	0.1868		0.002496	1.02061	0.14184
0.003329	-0.100226	0.0455657		0.003327	-0.14028	0.0499841		0.003329	2.18113	0.184999		0.003328	1.02044	0.141828
0.004161	-0.101277	0.0454818		0.004159	-0.141559	0.0499022		0.004161	2.15631	0.183183		0.00416	1.01953	0.141765
0.004993	-0.102283	0.0454015		0.004991	-0.1483	0.0494706		0.004994	2.09005	0.178336		0.004992	0.534483	0.108342
0.005825	-0.103721	0.0452867		0.005822	-0.156682	0.0489339		0.005826	2.04706	0.175191		0.005824	-0.000954	0.0714473
0.006657	-0.105168	0.0451712		0.006654	-0.069404	0.0545222		0.006658	0.685907	0.0756223		0.006656	-0.000684	0.0714659
0.007489	-0.105975	0.0451068		0.007486	-0.001263	0.0588851		0.00749	-0.000333	0.0254236		0.007488	-0.002687	0.0713278
0.008322	-0.107455	0.0449886		0.008318	-0.001929	0.0588425		0.008323	-0.000232	0.025431		0.00832	-0.00322	0.0712911
0.009154	-0.109336	0.0448385		0.00915	-0.002956	0.0587767		0.009155	-0.000862	0.0253849		0.009152	-0.004326	0.0712149
0.009986	-0.11058	0.0447392		0.009981	-0.004012	0.0587091		0.009987	-0.001407	0.025345		0.009984	-0.005246	0.0711515
0.010818	-0.110656	0.0447331		0.010813	-0.00593	0.0585863		0.01082	-0.001551	0.0253345		0.010816	-0.00541	0.0711402
0.01165	-0.111168	0.0446922		0.011645	-0.007271	0.0585005		0.011652	-0.001695	0.025324		0.011648	-0.006675	0.0710531
0.012482	-0.111585	0.0446589		0.012477	-0.008389	0.0584289		0.012484	-0.001309	0.0253522		0.01248	-0.007505	0.0709959
0.013315	-0.111955	0.0446294		0.013309	-0.010041	0.0583231		0.013316	-0.001744	0.0253204		0.013311	-0.007842	0.0709726
0.014147	-0.112749	0.044566		0.01414	-0.0108	0.0582745		0.014149	-0.001767	0.0253187		0.014143	-0.008218	0.0709467
0.014979	-0.113145	0.0445344		0.014972	-0.011794	0.0582109		0.014981	-0.000555	0.0254073		0.014975	-0.008906	0.0708993
0.015811	-0.113259	0.0445253		0.015804	-0.013631	0.0580932		0.015813	-0.000706	0.0253963		0.015807	-0.009587	0.0708524
0.016643	-0.114187	0.0444512		0.016636	-0.015196	0.057993		0.016645	-0.001381	0.0253469		0.016639	-0.010327	0.0708014
0.017475	-0.114884	0.0443956		0.017467	-0.016768	0.0578924		0.017478	-0.002328	0.0252776		0.017471	-0.011628	0.0707118
0.018307	-0.11542	0.0443528		0.018299	-0.019015	0.0577485		0.01831	-0.003067	0.0252236		0.018303	-0.01298	0.0706186
0.01914	-0.116027	0.0443043		0.019131	-0.021755	0.0575731		0.019142	-0.003119	0.0252198		0.019135	-0.013285	0.0705976
0.019972	-0.117203	0.0442105		0.019963	-0.023653	0.0574516		0.019975	-0.003199	0.0252139		0.019967	-0.013609	0.0705753
0.020804	-0.119173	0.0440532		0.020795	-0.026172	0.0572903		0.020807	-0.003148	0.0252177		0.020799	-0.01523	0.0704636
0.021636	-0.119965	0.04399		0.021626	-0.029204	0.0570961		0.021639	-0.002972	0.0252305		0.021631	-0.017375	0.0703158
0.022468	-0.121008	0.0439067		0.022458	-0.032206	0.0569039		0.022471	-0.002496	0.0252654		0.022463	-0.018413	0.0702442
0.0233	-0.122592	0.0437803		0.02329	-0.034594	0.056751		0.023304	-0.003681	0.0251787		0.023295	-0.0203	0.0701142
0.024133	-0.123806	0.0436834		0.024122	-0.036513	0.0566281		0.024136	-0.004419	0.0251247		0.024127	-0.022677	0.0699504
0.024965	-0.12452	0.0436264		0.024953	-0.038593	0.056495		0.024968	-0.005345	0.025057		0.024959	-0.024506	0.0698244
0.025797	-0.125104	0.0435798		0.025785	-0.040885	0.0563482		0.0258	-0.005492	0.0250462		0.025791	-0.024845	0.069801
0.026629	-0.123955	0.0436715		0.026617	-0.043375	0.0561888		0.026633	-0.00693	0.024941		0.026623	-0.024757	0.0698071
0.027461	-0.122939	0.0437526		0.027449	-0.045976	0.0560222		0.027465	-0.009522	0.0247514		0.027455	-0.025912	0.0697275
0.028293	-0.122864	0.0437586		0.028281	-0.048462	0.0558631		0.028297	-0.01094	0.0246477		0.028287	-0.027486	0.069619
0.029126	-0.122684	0.0437729		0.029112	-0.051294	0.0556817		0.02913	-0.012249	0.0245519		0.029119	-0.028822	0.069527
0.029958	-0.122229	0.0438093		0.029944	-0.053882	0.055516		0.029962	-0.012752	0.0245151		0.029951	-0.029131	0.0695057
0.03079	-0.122473	0.0437898		0.030776	-0.056107	0.0553736		0.030794	-0.013923	0.0244295		0.030783	-0.029257	0.069497
0.031622	-0.123346	0.0437201		0.031608	-0.058034	0.0552502		0.031626	-0.015025	0.0243489		0.031615	-0.029106	0.0695074
0.032454	-0.123883	0.0436772		0.032439	-0.059859	0.0551333		0.032459	-0.016491	0.0242416		0.032447	-0.028569	0.0695444
0.033286	-0.124458	0.0436313		0.033271	-0.061213	0.0550466		0.033291	-0.017794	0.0241463		0.033279	-0.029384	0.0694883
0.034118	-0.124627	0.0436178		0.034103	-0.06329	0.0549137		0.034123	-0.018863	0.0240681		0.034111	-0.030389	0.069419
0.034951	-0.124433	0.0436333		0.034935	-0.066303	0.0547207		0.034955	-0.020578	0.0239427		0.034943	-0.030372	0.0694202
0.035783	-0.124509	0.0436273		0.035767	-0.067579	0.054639		0.035788	-0.022902	0.0237727		0.035775	-0.030576	0.0694061
0.036615	-0.125781	0.0435257		0.036598	-0.069259	0.0545315		0.03662	-0.024574	0.0236503		0.036607	-0.030893	0.0693843
0.037447	-0.126785	0.0434456		0.03743	-0.072189	0.0543439		0.037452	-0.025312	0.0235964		0.037439	-0.031646	0.0693324
0.038279	-0.127756	0.0433681		0.038262	-0.074408	0.0542018		0.038285	-0.026434	0.0235143		0.03827	-0.032303	0.0692871
0.039111	-0.128776	0.0432866		0.039094	-0.076024	0.0540983		0.039117	-0.028026	0.0233978		0.039102	-0.033076	0.0692338
0.039944	-0.128876	0.0432787		0.039926	-0.076834	0.0540465		0.039949	-0.030384	0.0232253		0.039934	-0.034579	0.0691303
0.040776	-0.128875	0.0432787		0.040757	-0.078582	0.0539345		0.040781	-0.033107	0.0230262		0.040766	-0.034918	0.0691069
0.041608	-0.128895	0.0432771		0.041589	-0.08085	0.0537893		0.041614	-0.034758	0.0229054		0.041598	-0.035255	0.0690837
0.04244	-0.129747	0.0432091		0.042421	-0.083445	0.0536232		0.042446	-0.036616	0.0227695		0.04243	-0.036274	0.0690135
0.043272	-0.134128	0.0428594		0.043253	-0.08663	0.0534192		0.043278	-0.035279	0.0228673		0.043262	-0.038236	0.0688783
0.044104	-0.140673	0.0423369		0.044084	-0.090972	0.0531412		0.04411	-0.028432	0.0233681		0.044094	-0.041001	0.0686878
0.044937	-0.150475	0.0415545		0.044916	-0.095035	0.0528811		0.044943	-0.019277	0.0240378		0.044926	-0.042788	0.0685646
0.045769	-0.159947	0.0407984		0.045748	-0.097922	0.0526962		0.045775	-0.011814	0.0245837		0.045758	-0.043912	0.0684872
0.046601	-0.16638	0.0402848		0.04658	-0.101445	0.0524707		0.046607	-0.007225	0.0249194		0.04659	-0.046318	0.0683214
0.047433	-0.171601	0.0398681		0.047412	-0.103764	0.0523222		0.04744	-0.00507	0.0250771		0.047422	-0.048527	0.0681692
0.048265	-0.175969	0.0395194		0.048243	-0.106121	0.0521713		0.048272	-0.003761	0.0251728		0.048254	-0.050048	0.0680644
0.049097	-0.179019	0.0392759		0.049075	-0.109444	0.0519585		0.049104	-0.00554	0.0250427		0.049086	-0.051583	0.0679586
0.049929	-0.180819	0.0391322		0.049907	-0.112672	0.0517518		0.049936	-0.008247	0.0248447		0.049918	-0.053354	0.0678366
0.050762	-0.181383	0.0390872		0.050739	-0.115164	0.0515923		0.050769	-0.012767	0.024514		0.05075	-0.055589	0.0676826
0.051594	-0.181924	0.039044		0.05157	-0.117251	0.0514586		0.051601	-0.017568	0.0241628		0.051582	-0.056429	0.0676247
0.052426	-0.181534	0.0390751		0.052402	-0.118053	0.0514073		0.052433	-0.02189	0.0238467		0.052414	-0.0575	0.0675509
0.053258	-0.179933	0.0392029		0.053234	-0.119522	0.0513132		0.053265	-0.025779	0.0235622		0.053246	-0.058435	0.0674864
0.05409	-0.178499	0.0393174		0.054066	-0.121681	0.051175		0.054098	-0.029947	0.0232573		0.054078	-0.058871	0.0674564
0.054922	-0.177616	0.0393879		0.054898	-0.123224	0.0510762		0.05493	-0.035079	0.0228819		0.05491	-0.059422	0.0674184
0.055755	-0.17773	0.0393788		0.055729	-0.124081	0.0510213		0.055762	-0.040766	0.0224659		0.055742	-0.061562	0.067271
0.056587	-0.177813	0.0393722		0.056561	-0.125742	0.050915		0.056595	-0.046336	0.0220584		0.056574	-0.063468	0.0671396
0.057419	-0.176723	0.0394592		0.057393	-0.126572	0.0508618		0.057427	-0.051001	0.0217172		0.057406	-0.064409	0.0670748
0.058251	-0.174802	0.0396125		0.058225	-0.126576	0.0508616		0.058259	-0.05532	0.0214013		0.058238	-0.064938	0.0670383
0.059083	-0.172978	0.0397581		0.059057	-0.127827	0.0507815		0.059091	-0.059605	0.0210878		0.05907	-0.065594	0.0669931
0.059915	-0.170453	0.0399597		0.059888	-0.130433	0.0506146		0.059924	-0.063518	0.0208016		0.059902	-0.065784	0.0669801
0.060748	-0.169675	0.0400218		0.06072	-0.132135	0.0505056		0.060756	-0.067163	0.0205349		0.060734	-0.065452	0.0670029
0.06158	-0.169662	0.0400228		0.061552	-0.133025	0.0504486		0.061588	-0.07103	0.0202521		0.061566	-0.064821	0.0670464
0.062412	-0.169206	0.0400592		0.062384	-0.133016	0.0504492		0.06242	-0.075187	0.019948		0.062398	-0.063479	0.0671389
0.063244	-0.16819	0.0401404		0.063215	-0.132351	0.0504918		0.063253	-0.07914	0.0196588		0.063229	-0.06222	0.0672256
0.064076	-0.164134	0.0404641		0.064047	-0.131072	0.0505737		0.064085	-0.08445	0.0192704		0.064061	-0.060692	0.0673309
0.064908	-0.158027	0.0409516		0.064879	-0.129542	0.0506717		0.064917	-0.094381	0.0185439		0.064893	-0.058035	0.067514
0.06574	-0.149564	0.0416272		0.065711	-0.128771	0.050721		0.06575	-0.106977	0.0176225		0.065725	-0.055506	0.0676883
0.066573	-0.140562	0.0423458		0.066543	-0.128732	0.0507235		0.066582	-0.118592	0.0167729		0.066557	-0.05403	0.06779
0.067405	-0.134289	0.0428466		0.067374	-0.127864	0.0507791		0.067414	-0.127394	0.016129		0.067389	-0.052465	0.0678978
0.068237	-0.129943	0.0431935		0.068206	-0.128205	0.0507573		0.068246	-0.133504	0.0156821		0.068221	-0.051868	0.067939
0.069069	-0.126843	0.0434409		0.069038	-0.127873	0.0507785		0.069079	-0.137813	0.0153669		0.069053	-0.051483	0.0679655
0.069901	-0.124903	0.0435958		0.06987	-0.127094	0.0508284		0.069911	-0.139762	0.0152243		0.069885	-0.050392	0.0680407
0.070733	-0.124064	0.0436628		0.070701	-0.126817	0.0508461		0.070743	-0.140787	0.0151493		0.070717	-0.050038	0.0680651
0.071566	-0.124899	0.0435961		0.071533	-0.125973	0.0509002		0.071575	-0.140952	0.0151372		0.071549	-0.04879	0.0681511
0.072398	-0.125494	0.0435486		0.072365	-0.126419	0.0508716		0.072408	-0.138861	0.0152902		0.072381	-0.048206	0.0681913
0.07323	-0.126776	0.0434463		0.073197	-0.128386	0.0507457		0.07324	-0.136621	0.0154541		0.073213	-0.047074	0.0682693
0.074062	-0.128841	0.0432815		0.074029	-0.129082	0.0507011		0.074072	-0.134729	0.0155925		0.074045	-0.043702	0.0685016
0.074894	-0.131578	0.043063		0.07486	-0.128872	0.0507146		0.074905	-0.132883	0.0157275		0.074877	-0.034585	0.0691299
0.075726	-0.133717	0.0428922		0.075692	-0.128917	0.0507117		0.075737	-0.130149	0.0159275		0.075709	-0.029893	0.0694532
0.076559	-0.134161	0.0428568		0.076524	-0.129616	0.0506669		0.076569	-0.126418	0.0162004		0.076541	-0.028634	0.0695399
0.077391	-0.133867	0.0428802		0.077356	-0.130839	0.0505886		0.077401	-0.123314	0.0164275		0.077373	-0.026425	0.0696921
0.078223	-0.134882	0.0427992		0.078187	-0.132969	0.0504522		0.078234	-0.120597	0.0166262		0.078205	-0.026129	0.0697125
0.079055	-0.136393	0.0426786		0.079019	-0.134308	0.0503665		0.079066	-0.119303	0.0167209		0.079037	-0.026053	0.0697178
0.079887	-0.137479	0.0425919		0.079851	-0.13445	0.0503574		0.079898	-0.117945	0.0168202		0.079869	-0.025362	0.0697654
0.080719	-0.139277	0.0424484		0.080683	-0.134968	0.0503242		0.08073	-0.116028	0.0169604		0.080701	-0.025137	0.0697809
0.081551	-0.141176	0.0422968		0.081515	-0.136591	0.0502203		0.081563	-0.114913	0.017042		0.081533	-0.024931	0.0697951
0.082384	-0.142142	0.0422197		0.082346	-0.137922	0.0501351		0.082395	-0.112521	0.017217		0.082365	-0.025464	0.0697584
0.083216	-0.143312	0.0421263		0.083178	-0.138983	0.0500672		0.083227	-0.11005	0.0173977		0.083197	-0.026586	0.0696811
0.084048	-0.14549	0.0419524		0.08401	-0.14006	0.0499982		0.08406	-0.10751	0.0175835		0.084029	-0.028015	0.0695826
0.08488	-0.147188	0.0418169		0.084842	-0.140264	0.0499851		0.084892	-0.106109	0.017686		0.084861	-0.029383	0.0694883
0.085712	-0.146678	0.0418576		0.085674	-0.140374	0.0499781		0.085724	-0.103574	0.0178715		0.085693	-0.031022	0.0693754
0.086544	-0.14583	0.0419253		0.086505	-0.14091	0.0499438		0.086556	-0.101181	0.0180465		0.086525	-0.033159	0.0692281
0.087377	-0.146076	0.0419056		0.087337	-0.14166	0.0498958		0.087389	-0.099121	0.0181972		0.087357	-0.034004	0.0691699
0.088209	-0.147392	0.0418006		0.088169	-0.141549	0.0499029		0.088221	-0.097877	0.0182882		0.088188	-0.034368	0.0691448
0.089041	-0.148247	0.0417323		0.089001	-0.142295	0.0498551		0.089053	-0.097127	0.0183431		0.08902	-0.034495	0.0691361
0.089873	-0.148427	0.041718		0.089832	-0.144257	0.0497295		0.089885	-0.095886	0.0184338		0.089852	-0.034237	0.0691538
0.090705	-0.149112	0.0416633		0.090664	-0.145298	0.0496628		0.090718	-0.094313	0.0185489		0.090684	-0.034644	0.0691258
0.091537	-0.149914	0.0415993		0.091496	-0.14652	0.0495846		0.09155	-0.091831	0.0187305		0.091516	-0.034256	0.0691525
0.09237	-0.15091	0.0415198		0.092328	-0.149189	0.0494137		0.092382	-0.08923	0.0189207		0.092348	-0.033854	0.0691802
0.093202	-0.151573	0.0414668		0.09316	-0.150835	0.0493083		0.093215	-0.088123	0.0190017		0.09318	-0.034781	0.0691164
0.094034	-0.151823	0.0414469		0.093991	-0.151798	0.0492466		0.094047	-0.087103	0.0190763		0.094012	-0.036353	0.069008
0.094866	-0.152829	0.0413666		0.094823	-0.152777	0.049184		0.094879	-0.085096	0.0192231		0.094844	-0.040786	0.0687026
0.095698	-0.152467	0.0413955		0.095655	-0.154116	0.0490982		0.095711	-0.083532	0.0193375		0.095676	-0.04954	0.0680994
0.09653	-0.152503	0.0413926		0.096487	-0.154757	0.0490572		0.096544	-0.082419	0.019419		0.096508	-0.054521	0.0677561
0.097363	-0.153522	0.0413112		0.097318	-0.154271	0.0490883		0.097376	-0.081396	0.0194938		0.09734	-0.055518	0.0676874
0.098195	-0.155504	0.041153		0.09815	-0.153709	0.0491243		0.098208	-0.079512	0.0196316		0.098172	-0.057035	0.0675829
0.099027	-0.156917	0.0410402		0.098982	-0.153665	0.0491271		0.09904	-0.079959	0.0195989		0.099004	-0.057186	0.0675725
0.099859	-0.157801	0.0409697		0.099814	-0.154199	0.0490929		0.099873	-0.078763	0.0196864		0.099836	-0.057659	0.0675399
0.100691	-0.15869	0.0408987		0.100646	-0.155925	0.0489824		0.100705	-0.077225	0.0197989		0.100668	-0.058534	0.0674796
0.101523	-0.158672	0.0409001		0.101477	-0.156225	0.0489632		0.101537	-0.075802	0.019903		0.1015	-0.058819	0.06746
0.102355	-0.158679	0.0408996		0.102309	-0.155967	0.0489797		0.10237	-0.073833	0.020047		0.102332	-0.059143	0.0674377
0.103188	-0.159688	0.040819		0.103141	-0.155565	0.0490055		0.103202	-0.073038	0.0201052		0.103164	-0.059603	0.067406
0.10402	-0.160421	0.0407605		0.103973	-0.156274	0.0489601		0.104034	-0.073404	0.0200784		0.103996	-0.059153	0.067437
0.104852	-0.160405	0.0407618		0.104805	-0.15558	0.0490045		0.104866	-0.073344	0.0200828		0.104828	-0.058107	0.067509
0.105684	-0.160394	0.0407627		0.105636	-0.156792	0.0489269		0.105699	-0.07259	0.020138		0.10566	-0.057666	0.0675394
0.106516	-0.160897	0.0407225		0.106468	-0.157547	0.0488785		0.106531	-0.072459	0.0201475		0.106492	-0.057037	0.0675828
0.107348	-0.16157	0.0406688		0.1073	-0.158156	0.0488396		0.107363	-0.072669	0.0201322		0.107324	-0.055802	0.0676679
0.108181	-0.162738	0.0405756		0.108132	-0.158795	0.0487986		0.108195	-0.072564	0.0201399		0.108156	-0.055475	0.0676904
0.109013	-0.16288	0.0405642		0.108963	-0.160743	0.0486739		0.109028	-0.071877	0.0201901		0.108988	-0.055182	0.0677106
0.109845	-0.163556	0.0405103		0.109795	-0.161418	0.0486307		0.10986	-0.070868	0.0202639		0.10982	-0.055163	0.0677119
0.110677	-0.16557	0.0403495		0.110627	-0.161087	0.0486519		0.110692	-0.069961	0.0203303		0.110652	-0.055236	0.0677069
0.111509	-0.166967	0.040238		0.111459	-0.161209	0.0486441		0.111525	-0.07012	0.0203186		0.111484	-0.054703	0.0677436
0.112341	-0.168194	0.04014		0.112291	-0.160835	0.048668		0.112357	-0.070481	0.0202922		0.112316	-0.053565	0.067822
0.113174	-0.167675	0.0401815		0.113122	-0.160957	0.0486602		0.113189	-0.070717	0.020275		0.113148	-0.052324	0.0679075
0.114006	-0.168093	0.0401481		0.113954	-0.161344	0.0486354		0.114021	-0.070693	0.0202767		0.113979	-0.051345	0.067975
0.114838	-0.168985	0.0400769		0.114786	-0.160918	0.0486627		0.114854	-0.070254	0.0203088		0.114811	-0.050973	0.0680006
0.11567	-0.169758	0.0400152		0.115618	-0.160799	0.0486703		0.115686	-0.07088	0.020263		0.115643	-0.0511	0.0679919
0.116502	-0.170908	0.0399234		0.116449	-0.160681	0.0486779		0.116518	-0.071252	0.0202358		0.116475	-0.051334	0.0679758
0.117334	-0.171333	0.0398895		0.117281	-0.160716	0.0486756		0.11735	-0.071197	0.0202399		0.117307	-0.051262	0.0679807
0.118166	-0.17258	0.0397899		0.118113	-0.162294	0.0485746		0.118183	-0.071065	0.0202495		0.118139	-0.051523	0.0679627
0.118999	-0.174132	0.039666		0.118945	-0.163182	0.0485177		0.119015	-0.071088	0.0202478		0.118971	-0.051141	0.0679891
0.119831	-0.17541	0.039564		0.119777	-0.163566	0.0484932		0.119847	-0.070137	0.0203174		0.119803	-0.050013	0.0680668
0.120663	-0.176166	0.0395037		0.120608	-0.163169	0.0485186		0.12068	-0.069422	0.0203697		0.120635	-0.047858	0.0682153
0.121495	-0.177696	0.0393815		0.12144	-0.16238	0.0485691		0.121512	-0.069255	0.0203819		0.121467	-0.04628	0.068324
0.122327	-0.180096	0.0391899		0.122272	-0.162129	0.0485852		0.122344	-0.069292	0.0203792		0.122299	-0.045819	0.0683558
0.123159	-0.181481	0.0390794		0.123104	-0.16178	0.0486075		0.123176	-0.068926	0.020406		0.123131	-0.044935	0.0684167
0.123992	-0.181859	0.0390492		0.123935	-0.161654	0.0486156		0.124009	-0.068301	0.0204517		0.123963	-0.043752	0.0684982
0.124824	-0.182598	0.0389902		0.124767	-0.161274	0.0486399		0.124841	-0.066556	0.0205793		0.124795	-0.043518	0.0685143
0.125656	-0.184119	0.0388688		0.125599	-0.161052	0.0486541		0.125673	-0.064993	0.0206937		0.125627	-0.043959	0.0684839
0.126488	-0.185456	0.0387621		0.126431	-0.159834	0.0487321		0.126505	-0.065052	0.0206894		0.126459	-0.043112	0.0685423
0.12732	-0.187152	0.0386267		0.127263	-0.15936	0.0487625		0.127338	-0.064453	0.0207332		0.127291	-0.042581	0.0685789
0.128152	-0.18842	0.0385255		0.128094	-0.158719	0.0488035		0.12817	-0.06345	0.0208065		0.128123	-0.04201	0.0686182
0.128985	-0.188322	0.0385333		0.128926	-0.157362	0.0488904		0.129002	-0.06237	0.0208856		0.128955	-0.041358	0.0686632
0.129817	-0.188419	0.0385255		0.129758	-0.156064	0.0489735		0.129835	-0.062537	0.0208733		0.129787	-0.041756	0.0686357
0.130649	-0.189699	0.0384234		0.13059	-0.155172	0.0490306		0.130667	-0.062991	0.0208401		0.130619	-0.041642	0.0686436
0.131481	-0.18982	0.0384137		0.131422	-0.15516	0.0490314		0.131499	-0.063614	0.0207946		0.131451	-0.040885	0.0686958
0.132313	-0.188965	0.038482		0.132253	-0.155819	0.0489892		0.132331	-0.063316	0.0208164		0.132283	-0.039358	0.068801
0.133145	-0.188681	0.0385046		0.133085	-0.15547	0.0490115		0.133164	-0.062629	0.0208666		0.133115	-0.039938	0.068761
0.133977	-0.190045	0.0383957		0.133917	-0.154044	0.0491028		0.133996	-0.061658	0.0209376		0.133947	-0.041039	0.0686851
0.13481	-0.191118	0.0383101		0.134749	-0.153484	0.0491387		0.134828	-0.061313	0.0209629		0.134779	-0.041328	0.0686652
0.135642	-0.19092	0.0383259		0.13558	-0.153419	0.0491429		0.13566	-0.061345	0.0209605		0.135611	-0.040318	0.0687348
0.136474	-0.191297	0.0382958		0.136412	-0.153677	0.0491263		0.136493	-0.061051	0.020982		0.136443	-0.039757	0.0687735
0.137306	-0.192085	0.0382329		0.137244	-0.153891	0.0491126		0.137325	-0.061061	0.0209813		0.137275	-0.039187	0.0688128
0.138138	-0.192535	0.038197		0.138076	-0.153743	0.0491221		0.138157	-0.060615	0.0210139		0.138107	-0.038946	0.0688294
0.13897	-0.191787	0.0382567		0.138908	-0.152924	0.0491746		0.13899	-0.060164	0.0210469		0.138938	-0.038109	0.068887
0.139803	-0.189915	0.0384061		0.139739	-0.152497	0.0492019		0.139822	-0.05916	0.0211204		0.13977	-0.037031	0.0689613
0.140635	-0.188604	0.0385108		0.140571	-0.151867	0.0492422		0.140654	-0.057605	0.0212341		0.140602	-0.037177	0.0689513
0.141467	-0.187858	0.0385703		0.141403	-0.1517	0.0492529		0.141486	-0.056178	0.0213385		0.141434	-0.038034	0.0688922
0.142299	-0.187306	0.0386144		0.142235	-0.151695	0.0492532		0.142319	-0.055983	0.0213528		0.142266	-0.038394	0.0688674
0.143131	-0.18664	0.0386675		0.143066	-0.151512	0.049265		0.143151	-0.056057	0.0213473		0.143098	-0.037638	0.0689195
0.143963	-0.185624	0.0387487		0.143898	-0.151941	0.0492375		0.143983	-0.055889	0.0213596		0.14393	-0.037409	0.0689353
0.144796	-0.184761	0.0388175		0.14473	-0.151622	0.0492579		0.144815	-0.055058	0.0214204		0.144762	-0.03707	0.0689586
0.145628	-0.183128	0.0389479		0.145562	-0.150376	0.0493377		0.145648	-0.055177	0.0214117		0.145594	-0.03648	0.0689993
0.14646	-0.180768	0.0391363		0.146394	-0.149771	0.0493764		0.14648	-0.054764	0.0214419		0.146426	-0.036236	0.0690161
0.147292	-0.178558	0.0393127		0.147225	-0.149978	0.0493632		0.147312	-0.052553	0.0216037		0.147258	-0.036366	0.0690071
0.148124	-0.176848	0.0394492		0.148057	-0.149469	0.0493958		0.148145	-0.050998	0.0217174		0.14809	-0.035176	0.0690891
0.148956	-0.175482	0.0395583		0.148889	-0.14851	0.0494572		0.148977	-0.049255	0.0218449		0.148922	-0.034933	0.0691059
0.149788	-0.173937	0.0396816		0.149721	-0.148273	0.0494723		0.149809	-0.048154	0.0219255		0.149754	-0.034281	0.0691508
0.150621	-0.172678	0.0397821		0.150553	-0.148639	0.0494489		0.150641	-0.046176	0.0220701		0.150586	-0.033694	0.0691913
0.151453	-0.168617	0.0401063		0.151384	-0.147699	0.0495091		0.151474	-0.044471	0.0221949		0.151418	-0.032074	0.0693029
0.152285	-0.165858	0.0403265		0.152216	-0.14667	0.049575		0.152306	-0.04144	0.0224166		0.15225	-0.031243	0.0693602
0.153117	-0.164389	0.0404438		0.153048	-0.144455	0.0497168		0.153138	-0.038281	0.0226477		0.153082	-0.030969	0.069379
0.153949	-0.16341	0.0405219		0.15388	-0.143226	0.0497955		0.15397	-0.035929	0.0228197		0.153914	-0.028827	0.0695266
0.154781	-0.159258	0.0408534		0.154711	-0.140966	0.0499402		0.154803	-0.033231	0.0230171		0.154746	-0.026627	0.0696782
0.155614	-0.153841	0.0412858		0.155543	-0.138947	0.0500695		0.155635	-0.029672	0.0232774		0.155578	-0.024937	0.0697947
0.156446	-0.150398	0.0415606		0.156375	-0.137208	0.0501808		0.156467	-0.025845	0.0235574		0.15641	-0.023183	0.0699155
0.157278	-0.146238	0.0418927		0.157207	-0.135442	0.0502939		0.1573	-0.021747	0.0238571		0.157242	-0.020127	0.0701261
0.15811	-0.141225	0.0422929		0.158039	-0.132761	0.0504656		0.158132	-0.01741	0.0241744		0.158074	-0.017005	0.0703412
0.158942	-0.136374	0.0426801		0.15887	-0.130275	0.0506247		0.158964	-0.013326	0.0244731		0.158906	-0.014206	0.0705341
0.159774	-0.131115	0.0430999		0.159702	-0.127685	0.0507906		0.159796	-0.009126	0.0247804		0.159738	-0.011662	0.0707094
0.160607	-0.126466	0.043471		0.160534	-0.123978	0.0510279		0.160629	-0.005111	0.0250741		0.16057	-0.008661	0.0709162
0.161439	-0.121379	0.0438771		0.161366	-0.120794	0.0512318		0.161461	-0.001224	0.0253584		0.161402	-0.005086	0.0711625
0.162271	-0.117103	0.0442185		0.162197	-0.117611	0.0514356		0.162293	0.003056	0.0256715		0.162234	-0.001596	0.071403
0.163103	-0.112221	0.0446082		0.163029	-0.11335	0.0517084		0.163125	0.008013	0.0260341		0.163066	0.001992	0.0716503
0.163935	-0.106301	0.0450807		0.163861	-0.110094	0.0519169		0.163958	0.014077	0.0264777		0.163897	0.005512	0.0718928
0.164767	-0.101315	0.0454788		0.164693	-0.106779	0.0521291		0.16479	0.019642	0.0268848		0.164729	0.008737	0.072115
0.165599	-0.096909	0.0458305		0.165525	-0.104318	0.0522867		0.165622	0.024707	0.0272553		0.165561	0.011654	0.072316
0.166432	-0.093165	0.0461293		0.166356	-0.101643	0.052458		0.166455	0.030267	0.027662		0.166393	0.015184	0.0725593
0.167264	-0.087273	0.0465997		0.167188	-0.097861	0.0527001		0.167287	0.035514	0.0280458		0.167225	0.020476	0.0729239
0.168096	-0.082701	0.0469647		0.16802	-0.093695	0.0529669		0.168119	0.039801	0.0283594		0.168057	0.02595	0.0733011
0.168928	-0.076717	0.0474423		0.168852	-0.089332	0.0532462		0.168951	0.043717	0.0286459		0.168889	0.030315	0.0736019
0.16976	-0.070908	0.047906		0.169683	-0.086032	0.0534575		0.169784	0.047076	0.0288916		0.169721	0.034653	0.0739008
0.170592	-0.065678	0.0483235		0.170515	-0.082633	0.0536752		0.170616	0.05141	0.0292086		0.170553	0.038485	0.0741649
0.171425	-0.06137	0.0486674		0.171347	-0.078843	0.0539178		0.171448	0.05639	0.0295729		0.171385	0.043185	0.0744887
0.172257	-0.058185	0.0489217		0.172179	-0.07619	0.0540877		0.17228	0.061159	0.0299218		0.172217	0.046273	0.0747015
0.173089	-0.053169	0.0493221		0.173011	-0.07354	0.0542574		0.173113	0.06492	0.0301969		0.173049	0.049636	0.0749332
0.173921	-0.048148	0.0497229		0.173842	-0.071049	0.0544169		0.173945	0.068271	0.030442		0.173881	0.052673	0.0751425
0.174753	-0.04244	0.0501786		0.174674	-0.068534	0.0545779		0.174777	0.071858	0.0307044		0.174713	0.054172	0.0752458
0.175585	-0.039164	0.0504401		0.175506	-0.067125	0.0546681		0.17561	0.074709	0.0309129		0.175545	0.055214	0.0753176
0.176418	-0.036693	0.0506373		0.176338	-0.065197	0.0547916		0.176442	0.077362	0.031107		0.176377	0.057031	0.0754428
0.17725	-0.033396	0.0509005		0.17717	-0.063946	0.0548717		0.177274	0.079823	0.031287		0.177209	0.058552	0.0755476
0.178082	-0.029923	0.0511777		0.178001	-0.061794	0.0550094		0.178106	0.081857	0.0314358		0.178041	0.060177	0.0756596
0.178914	-0.027003	0.0514108		0.178833	-0.060821	0.0550717		0.178939	0.083464	0.0315534		0.178873	0.062176	0.0757973
0.179746	-0.024474	0.0516127		0.179665	-0.059558	0.0551526		0.179771	0.084907	0.0316589		0.179705	0.064506	0.0759579
0.180578	-0.022601	0.0517622		0.180497	-0.059021	0.055187		0.180603	0.086543	0.0317786		0.180537	0.068314	0.0762203
0.18141	-0.021897	0.0518184		0.181328	-0.058997	0.0551885		0.181435	0.089116	0.0319668		0.181369	0.070633	0.0763801
0.182243	-0.020711	0.0519131		0.18216	-0.058246	0.0552366		0.182268	0.090779	0.0320885		0.182201	0.070789	0.0763908
0.183075	-0.018159	0.0521168		0.182992	-0.057265	0.0552994		0.1831	0.092103	0.0321853		0.183033	0.071268	0.0764238
0.183907	-0.015899	0.0522972		0.183824	-0.056756	0.055332		0.183932	0.093145	0.0322615		0.183865	0.071496	0.0764395
0.184739	-0.01457	0.0524033		0.184656	-0.05689	0.0553234		0.184765	0.093715	0.0323032		0.184697	0.071168	0.0764169
0.185571	-0.013797	0.052465		0.185487	-0.056323	0.0553597		0.185597	0.094765	0.03238		0.185529	0.071743	0.0764566
0.186403	-0.011225	0.0526703		0.186319	-0.055733	0.0553975		0.186429	0.095355	0.0324232		0.186361	0.072459	0.0765059
0.187236	-0.009353	0.0528198		0.187151	-0.055938	0.0553844		0.187261	0.095713	0.0324494		0.187193	0.07348	0.0765763
0.188068	-0.008683	0.0528733		0.187983	-0.057218	0.0553024		0.188094	0.095522	0.0324354		0.188025	0.073516	0.0765787
0.1889	-0.006997	0.0530078		0.188814	-0.05841	0.0552261		0.188926	0.095612	0.032442		0.188857	0.072281	0.0764936
0.189732	-0.005587	0.0531204		0.189646	-0.059966	0.0551265		0.189758	0.096311	0.0324931		0.189688	0.072339	0.0764976
0.190564	-0.004523	0.0532053		0.190478	-0.060796	0.0550733		0.19059	0.096871	0.0325341		0.19052	0.071855	0.0764643
0.191396	-0.004369	0.0532176		0.19131	-0.060521	0.055091		0.191423	0.09633	0.0324945		0.191352	0.073822	0.0765998
0.192229	-0.00339	0.0532958		0.192142	-0.061095	0.0550542		0.192255	0.095454	0.0324304		0.192184	0.072213	0.0764889
0.193061	-0.002225	0.0533888		0.192973	-0.062148	0.0549868		0.193087	0.094765	0.03238		0.193016	0.071186	0.0764182
0.193893	-0.00225	0.0533868		0.193805	-0.06274	0.0549489		0.19392	0.095112	0.0324054		0.193848	0.070586	0.0763768
0.194725	-0.001298	0.0534628		0.194637	-0.06382	0.0548797		0.194752	0.094848	0.0323861		0.19468	0.070779	0.0763901
0.195557	0.000441	0.0536016		0.195469	-0.063726	0.0548857		0.195584	0.093547	0.0322909		0.195512	0.072043	0.0764772
0.196389	0.001839	0.0537132		0.196301	-0.064302	0.0548489		0.196416	0.092406	0.0322075		0.196344	0.073817	0.0765995
0.197221	0.002812	0.0537909		0.197132	-0.064058	0.0548645		0.197249	0.09125	0.0321229		0.197176	0.072633	0.0765179
0.198054	0.00369	0.053861		0.197964	-0.063526	0.0548986		0.198081	0.089703	0.0320098		0.198008	0.074348	0.0766361
0.198886	0.00376	0.0538665		0.198796	-0.064214	0.0548545		0.198913	0.088274	0.0319052		0.19884	0.074294	0.0766323
0.199718	0.005555	0.0540098		0.199628	-0.065134	0.0547956		0.199745	0.087411	0.0318421		0.199672	0.073999	0.076612
0.20055	0.006433	0.0540799		0.200459	-0.065939	0.0547441		0.200578	0.086561	0.0317799		0.200504	0.07318	0.0765556
0.201382	0.006325	0.0540713		0.201291	-0.067877	0.05462		0.20141	0.084559	0.0316335		0.201336	0.071639	0.0764494
0.202214	0.008164	0.0542181		0.202123	-0.069769	0.0544988		0.202242	0.082335	0.0314708		0.202168	0.0704	0.076364
0.203047	0.008828	0.0542711		0.202955	-0.07068	0.0544405		0.203075	0.080911	0.0313666		0.203	0.069177	0.0762797
0.203879	0.0091	0.0542928		0.203787	-0.07214	0.054347		0.203907	0.0788	0.0312122		0.203832	0.06819	0.0762117
0.204711	0.009475	0.0543228		0.204618	-0.073978	0.0542293		0.204739	0.077448	0.0311133		0.204664	0.067289	0.0761497
0.205543	0.01038	0.054395		0.20545	-0.075786	0.0541136		0.205571	0.075655	0.0309821		0.205496	0.066816	0.0761171
0.206375	0.012127	0.0545345		0.206282	-0.076958	0.0540385		0.206404	0.073829	0.0308486		0.206328	0.064739	0.0759739
0.207207	0.013	0.0546041		0.207114	-0.078211	0.0539583		0.207236	0.072031	0.030717		0.20716	0.063119	0.0758623
0.20804	0.013484	0.0546428		0.207945	-0.078923	0.0539127		0.208068	0.069736	0.0305492		0.207992	0.061393	0.0757434
0.208872	0.013275	0.0546261		0.208777	-0.080016	0.0538427		0.2089	0.068155	0.0304335		0.208824	0.060841	0.0757053
0.209704	0.013401	0.0546362		0.209609	-0.080159	0.0538336		0.209733	0.066638	0.0303225		0.209656	0.06059	0.075688
0.210536	0.014242	0.0547033		0.210441	-0.08009	0.053838		0.210565	0.0647	0.0301808		0.210488	0.05961	0.0756205
0.211368	0.014911	0.0547567		0.211273	-0.08191	0.0537215		0.211397	0.063335	0.0300809		0.21132	0.058269	0.0755281
0.2122	0.015876	0.0548337		0.212104	-0.084384	0.053563		0.21223	0.062239	0.0300008		0.212152	0.056064	0.0753762
0.213032	0.016863	0.0549125		0.212936	-0.085576	0.0534867		0.213062	0.060633	0.0298833		0.212984	0.055275	0.0753218
0.213865	0.017697	0.0549791		0.213768	-0.087004	0.0533953		0.213894	0.059355	0.0297898		0.213816	0.054629	0.0752773
0.214697	0.018373	0.0550331		0.2146	-0.088721	0.0532854		0.214726	0.058795	0.0297488		0.214647	0.0535	0.0751995
0.215529	0.019228	0.0551013		0.215431	-0.089075	0.0532627		0.215559	0.057248	0.0296357		0.215479	0.052285	0.0751158
0.216361	0.01753	0.0549658		0.216263	-0.091956	0.0530782		0.216391	0.056479	0.0295794		0.216311	0.050506	0.0749932
0.217193	0.017477	0.0549615		0.217095	-0.094021	0.052946		0.217223	0.054876	0.0294621		0.217143	0.048337	0.0748437
0.218025	0.017503	0.0549636		0.217927	-0.097016	0.0527542		0.218055	0.053253	0.0293434		0.217975	0.048407	0.0748486
0.218858	0.017072	0.0549292		0.218759	-0.100341	0.0525413		0.218888	0.052369	0.0292788		0.218807	0.046454	0.074714
0.21969	0.0178	0.0549873		0.21959	-0.101958	0.0524378		0.21972	0.052231	0.0292687		0.219639	0.044474	0.0745776
0.220522	0.016554	0.0548878		0.220422	-0.102572	0.0523985		0.220552	0.052566	0.0292932		0.220471	0.042387	0.0744337
0.221354	0.015978	0.0548419		0.221254	-0.104302	0.0522877		0.221385	0.052561	0.0292928		0.221303	0.040507	0.0743042
0.222186	0.016155	0.054856		0.222086	-0.103761	0.0523224		0.222217	0.052486	0.0292873		0.222135	0.039402	0.0742281
0.223018	0.015587	0.0548107		0.222918	-0.103425	0.0523439		0.223049	0.051931	0.0292467		0.222967	0.038689	0.0741789
0.223851	0.015396	0.0547954		0.223749	-0.10558	0.0522059		0.223881	0.050745	0.02916		0.223799	0.039052	0.0742039
0.224683	0.015251	0.0547838		0.224581	-0.106303	0.0521596		0.224714	0.049407	0.0290621		0.224631	0.039085	0.0742062
0.225515	0.014762	0.0547448		0.225413	-0.107797	0.052064		0.225546	0.047427	0.0289173		0.225463	0.038591	0.0741722
0.226347	0.014309	0.0547086		0.226245	-0.106354	0.0521563		0.226378	0.046978	0.0288844		0.226295	0.037742	0.0741137
0.227179	0.014453	0.0547201		0.227076	-0.1083	0.0520317		0.22721	0.047365	0.0289127		0.227127	0.038327	0.074154
0.228011	0.014166	0.0546972		0.227908	-0.110541	0.0518883		0.228043	0.046425	0.028844		0.227959	0.03882	0.074188
0.228843	0.01392	0.0546776		0.22874	-0.111752	0.0518107		0.228875	0.045814	0.0287993		0.228791	0.038763	0.074184
0.229676	0.015213	0.0547808		0.229572	-0.113138	0.051722		0.229707	0.045297	0.0287614		0.229623	0.036591	0.0740344
0.230508	0.015466	0.054801		0.230404	-0.11526	0.0515861		0.23054	0.045425	0.0287708		0.230455	0.03401	0.0738565
0.23134	0.015159	0.0547765		0.231235	-0.117258	0.0514582		0.231372	0.045297	0.0287614		0.231287	0.031902	0.0737113
0.232172	0.014019	0.0546855		0.232067	-0.117904	0.0514168		0.232204	0.044312	0.0286894		0.232119	0.030542	0.0736175
0.233004	0.012124	0.0545342		0.232899	-0.118785	0.0513604		0.233036	0.042447	0.028553		0.232951	0.028284	0.073462
0.233836	0.012447	0.05456		0.233731	-0.119978	0.051284		0.233869	0.04171	0.028499		0.233783	0.027341	0.073397
0.234669	0.012328	0.0545505		0.234562	-0.121238	0.0512034		0.234701	0.040833	0.0284349		0.234615	0.026009	0.0733052
0.235501	0.011879	0.0545147		0.235394	-0.120564	0.0512465		0.235533	0.039237	0.0283181		0.235447	0.024403	0.0731945
0.236333	0.010311	0.0543895		0.236226	-0.120769	0.0512334		0.236365	0.038051	0.0282314		0.236279	0.023654	0.0731429
0.237165	0.010643	0.054416		0.237058	-0.121773	0.0511691		0.237198	0.03749	0.0281904		0.237111	0.022819	0.0730854
0.237997	0.009962	0.0543616		0.23789	-0.121613	0.0511793		0.23803	0.037426	0.0281857		0.237943	0.023215	0.0731127
0.238829	0.010337	0.0543916		0.238721	-0.122098	0.0511483		0.238862	0.037472	0.028189		0.238775	0.02163	0.0730035
0.239662	0.010887	0.0544355		0.239553	-0.1229	0.0510969		0.239695	0.0374	0.0281838		0.239606	0.019483	0.0728555
0.240494	0.011824	0.0545103		0.240385	-0.123857	0.0510357		0.240527	0.036853	0.0281438		0.240438	0.019231	0.0728381
0.241326	0.011865	0.0545135		0.241217	-0.123705	0.0510454		0.241359	0.034747	0.0279897		0.24127	0.019232	0.0728382
0.242158	0.011605	0.0544928		0.242049	-0.124179	0.051015		0.242191	0.032741	0.027843		0.242102	0.017967	0.072751
0.24299	0.012676	0.0545783		0.24288	-0.12508	0.0509574		0.243024	0.031201	0.0277303		0.242934	0.016771	0.0726686
0.243822	0.013271	0.0546258		0.243712	-0.12521	0.050949		0.243856	0.030002	0.0276426		0.243766	0.015278	0.0725658
0.244654	0.013388	0.0546351		0.244544	-0.125253	0.0509463		0.244688	0.030101	0.0276498		0.244598	0.014275	0.0724966
0.245487	0.013368	0.0546335		0.245376	-0.126014	0.0508976		0.24552	0.030965	0.027713		0.24543	0.01294	0.0724047
0.246319	0.014089	0.0546911		0.246207	-0.1274	0.0508088		0.246353	0.03165	0.0277632		0.246262	0.011503	0.0723056
0.247151	0.014207	0.0547005		0.247039	-0.129712	0.0506608		0.247185	0.031442	0.0277479		0.247094	0.010117	0.0722101
0.247983	0.013894	0.0546755		0.247871	-0.12919	0.0506942		0.248017	0.03111	0.0277237		0.247926	0.006638	0.0719704
0.248815	0.014358	0.0547125		0.248703	-0.128877	0.0507142		0.248849	0.030783	0.0276997		0.248758	0.00522	0.0718727
0.249647	0.014579	0.0547302		0.249535	-0.129741	0.0506589		0.249682	0.030872	0.0277062		0.24959	0.002855	0.0717097
0.25048	0.013977	0.0546821		0.250366	-0.129209	0.050693		0.250514	0.030374	0.0276698		0.250422	0.00173	0.0716322
0.251312	0.014084	0.0546907		0.251198	-0.130165	0.0506318		0.251346	0.028859	0.027559		0.251254	0.003197	0.0717333
0.252144	0.013353	0.0546323		0.25203	-0.13083	0.0505892		0.252179	0.02831	0.0275188		0.252086	0.00304	0.0717225
0.252976	0.013137	0.0546151		0.252862	-0.129912	0.050648		0.253011	0.028318	0.0275194		0.252918	0.001889	0.0716432
0.253808	0.01486	0.0547526		0.253693	-0.131289	0.0505598		0.253843	0.028772	0.0275526		0.25375	0.00246	0.0716825
0.25464	0.01294	0.0545994		0.254525	-0.132232	0.0504994		0.254675	0.028106	0.0275039		0.254582	0.002113	0.0716586
0.255473	0.011005	0.0544449		0.255357	-0.132756	0.0504659		0.255508	0.027251	0.0274414		0.255414	0.001983	0.0716496
0.256305	0.010155	0.054377		0.256189	-0.134982	0.0503233		0.25634	0.027198	0.0274375		0.256246	0.001689	0.0716294
0.257137	0.011961	0.0545212		0.257021	-0.135412	0.0502958		0.257172	0.026266	0.0273693		0.257078	-0.00154	0.0714069
0.257969	0.011083	0.0544511		0.257852	-0.135582	0.0502849		0.258004	0.0252	0.0272913		0.25791	-0.002464	0.0713432
0.258801	0.010095	0.0543722		0.258684	-0.137881	0.0501377		0.258837	0.024404	0.0272331		0.258742	-0.003799	0.0712512
0.259633	0.009404	0.0543171		0.259516	-0.139084	0.0500607		0.259669	0.023778	0.0271873		0.259574	-0.004966	0.0711708
0.260466	0.009505	0.0543251		0.260348	-0.139501	0.050034		0.260501	0.022813	0.0271167		0.260406	-0.005414	0.0711399
0.261298	0.007901	0.0541971		0.26118	-0.140009	0.0500015		0.261334	0.022577	0.0270995		0.261238	-0.006768	0.0710466
0.26213	0.00761	0.0541739		0.262011	-0.141339	0.0499163		0.262166	0.023208	0.0271456		0.26207	-0.007817	0.0709744
0.262962	0.008302	0.0542291		0.262843	-0.142527	0.0498403		0.262998	0.023695	0.0271812		0.262902	-0.009315	0.0708711
0.263794	0.006607	0.0540938		0.263675	-0.14449	0.0497146		0.26383	0.024529	0.0272423		0.263734	-0.010064	0.0708195
0.264626	0.004843	0.053953		0.264507	-0.14582	0.0496294		0.264663	0.02378	0.0271875		0.264565	-0.01189	0.0706937
0.265458	0.004501	0.0539257		0.265338	-0.145638	0.0496411		0.265495	0.021932	0.0270523		0.265397	-0.013872	0.0705571
0.266291	0.00384	0.0538729		0.26617	-0.146701	0.049573		0.266327	0.020271	0.0269308		0.266229	-0.015336	0.0704563
0.267123	0.002321	0.0537517		0.267002	-0.146764	0.049569		0.267159	0.018209	0.0267799		0.267061	-0.016512	0.0703752
0.267955	0.002019	0.0537276		0.267834	-0.146537	0.0495835		0.267992	0.016747	0.026673		0.267893	-0.017307	0.0703204
0.268787	0.00129	0.0536694		0.268666	-0.14809	0.0494841		0.268824	0.015023	0.0265469		0.268725	-0.016126	0.0704018
0.269619	0.000228	0.0535846		0.269497	-0.14863	0.0494495		0.269656	0.014288	0.0264931		0.269557	-0.017339	0.0703182
0.270451	-0.000325	0.0535405		0.270329	-0.149435	0.0493979		0.270489	0.012869	0.0263893		0.270389	-0.017335	0.0703185
0.271284	-0.000989	0.0534874		0.271161	-0.152135	0.0492251		0.271321	0.011751	0.0263075		0.271221	-0.018843	0.0702146
0.272116	-0.002911	0.053334		0.271993	-0.152879	0.0491774		0.272153	0.011029	0.0262547		0.272053	-0.021642	0.0700217
0.272948	-0.004642	0.0531958		0.272824	-0.153216	0.0491559		0.272985	0.009913	0.0261731		0.272885	-0.023899	0.0698662
0.27378	-0.003348	0.0532991		0.273656	-0.154835	0.0490522		0.273818	0.008894	0.0260985		0.273717	-0.024222	0.0698439
0.274612	-0.003184	0.0533122		0.274488	-0.155863	0.0489864		0.27465	0.008111	0.0260413		0.274549	-0.026727	0.0696713
0.275444	-0.00222	0.0533892		0.27532	-0.156717	0.0489317		0.275482	0.008365	0.0260598		0.275381	-0.028057	0.0695797
0.276276	-0.000828	0.0535003		0.276152	-0.156368	0.048954		0.276314	0.008645	0.0260803		0.276213	-0.030108	0.0694384
0.277109	-0.000963	0.0534895		0.276983	-0.156416	0.048951		0.277147	0.008372	0.0260604		0.277045	-0.030498	0.0694115
0.277941	-0.001768	0.0534253		0.277815	-0.16024	0.0487061		0.277979	0.009473	0.0261409		0.277877	-0.029263	0.0694966
0.278773	-0.000875	0.0534965		0.278647	-0.161842	0.0486035		0.278811	0.009809	0.0261655		0.278709	-0.030724	0.0693959
0.279605	-0.000727	0.0535084		0.279479	-0.161489	0.0486261		0.279644	0.009592	0.0261496		0.279541	-0.031937	0.0693123
0.280437	-0.000797	0.0535028		0.28031	-0.16066	0.0486792		0.280476	0.008501	0.0260698		0.280373	-0.03268	0.0692611
0.281269	-0.003097	0.0533192		0.281142	-0.160439	0.0486934		0.281308	0.007726	0.0260131		0.281205	-0.033421	0.0692101
0.282102	-0.004222	0.0532294		0.281974	-0.160985	0.0486584		0.28214	0.006488	0.0259225		0.282037	-0.033753	0.0691872
0.282934	-0.005623	0.0531175		0.282806	-0.162126	0.0485854		0.282973	0.005521	0.0258518		0.282869	-0.035313	0.0690797
0.283766	-0.006163	0.0530744		0.283638	-0.163318	0.048509		0.283805	0.004617	0.0257857		0.283701	-0.034471	0.0691377
0.284598	-0.00634	0.0530603		0.284469	-0.162454	0.0485644		0.284637	0.002701	0.0256455		0.284533	-0.035392	0.0690743
0.28543	-0.007185	0.0529928		0.285301	-0.162915	0.0485348		0.28547	0.002755	0.0256495		0.285365	-0.03492	0.0691068
0.286262	-0.006513	0.0530465		0.286133	-0.164695	0.0484209		0.286302	0.003065	0.0256722		0.286197	-0.035644	0.0690569
0.287095	-0.006351	0.0530594		0.286965	-0.166475	0.0483069		0.287134	0.002649	0.0256417		0.287029	-0.036326	0.0690099
0.287927	-0.006413	0.0530545		0.287797	-0.166337	0.0483157		0.287966	0.00296	0.0256645		0.287861	-0.036852	0.0689737
0.288759	-0.007777	0.0529456		0.288628	-0.167967	0.0482114		0.288799	0.002578	0.0256365		0.288693	-0.036399	0.0690049
0.289591	-0.007983	0.0529291		0.28946	-0.169332	0.048124		0.289631	0.000476	0.0254828		0.289525	-0.036443	0.0690018
0.290423	-0.00906	0.0528432		0.290292	-0.169423	0.0481181		0.290463	-0.000286	0.025427		0.290356	-0.038153	0.068884
0.291255	-0.009703	0.0527918		0.291124	-0.171567	0.0479809		0.291295	0.000377	0.0254755		0.291188	-0.039502	0.0687911
0.292087	-0.009624	0.0527981		0.291955	-0.170657	0.0480391		0.292128	0.000359	0.0254742		0.29202	-0.040102	0.0687497
0.29292	-0.009288	0.052825		0.292787	-0.170415	0.0480546		0.29296	0.0004	0.0254772		0.292852	-0.040971	0.0686898
0.293752	-0.007862	0.0529388		0.293619	-0.171398	0.0479917		0.293792	-0.000698	0.0253969		0.293684	-0.04114	0.0686782
0.294584	-0.008596	0.0528802		0.294451	-0.172041	0.0479505		0.294624	-0.001189	0.025361		0.294516	-0.042045	0.0686158
0.295416	-0.00925	0.052828		0.295283	-0.171913	0.0479587		0.295457	-0.001548	0.0253347		0.295348	-0.042513	0.0685836
0.296248	-0.00977	0.0527865		0.296114	-0.171577	0.0479802		0.296289	-0.00248	0.0252665		0.29618	-0.043533	0.0685133
0.29708	-0.010591	0.052721		0.296946	-0.173351	0.0478666		0.297121	-0.002819	0.0252417		0.297012	-0.043574	0.0685105
0.297913	-0.00977	0.0527865		0.297778	-0.174985	0.047762		0.297954	-0.003809	0.0251693		0.297844	-0.045164	0.0684009
0.298745	-0.010396	0.0527365		0.29861	-0.174038	0.0478227		0.298786	-0.005323	0.0250586		0.298676	-0.046472	0.0683108
0.299577	-0.011912	0.0526155		0.299441	-0.174157	0.047815		0.299618	-0.006227	0.0249924		0.299508	-0.04739	0.0682475
0.300409	-0.012123	0.0525987		0.300273	-0.174723	0.0477788		0.30045	-0.006262	0.0249899		0.30034	-0.04831	0.0681841
0.301241	-0.012026	0.0526064		0.301105	-0.176719	0.047651		0.301283	-0.006468	0.0249748		0.301172	-0.049064	0.0681322
0.302073	-0.01176	0.0526276		0.301937	-0.176741	0.0476496		0.302115	-0.007173	0.0249232		0.302004	-0.050761	0.0680152
0.302906	-0.011244	0.0526688		0.302769	-0.177085	0.0476276		0.302947	-0.007398	0.0249068		0.302836	-0.051448	0.0679679
0.303738	-0.01138	0.052658		0.3036	-0.178593	0.047531		0.303779	-0.008647	0.0248154		0.303668	-0.052506	0.067895
0.30457	-0.012126	0.0525984		0.304432	-0.179027	0.0475032		0.304612	-0.009355	0.0247636		0.3045	-0.054225	0.0677765
0.305402	-0.012968	0.0525312		0.305264	-0.180021	0.0474396		0.305444	-0.009856	0.024727		0.305332	-0.05586	0.0676639
0.306234	-0.012475	0.0525706		0.306096	-0.181449	0.0473481		0.306276	-0.011132	0.0246336		0.306164	-0.058432	0.0674867
0.307066	-0.01301	0.0525279		0.306928	-0.181974	0.0473145		0.307109	-0.011918	0.0245761		0.306996	-0.05865	0.0674716
0.307899	-0.012754	0.0525483		0.307759	-0.182658	0.0472707		0.307941	-0.01222	0.024554		0.307828	-0.059588	0.067407
0.308731	-0.013714	0.0524717		0.308591	-0.184418	0.047158		0.308773	-0.013143	0.0244865		0.30866	-0.060906	0.0673162
0.309563	-0.013209	0.052512		0.309423	-0.184897	0.0471274		0.309605	-0.014281	0.0244033		0.309492	-0.063351	0.0671477
0.310395	-0.013102	0.0525205		0.310255	-0.184277	0.0471671		0.310438	-0.013576	0.0244549		0.310324	-0.066001	0.0669651
0.311227	-0.013365	0.0524995		0.311086	-0.183643	0.0472077		0.31127	-0.013747	0.0244423		0.311156	-0.067491	0.0668624
0.312059	-0.013496	0.0524891		0.311918	-0.182561	0.0472769		0.312102	-0.014385	0.0243957		0.311988	-0.068293	0.0668072
0.312891	-0.013834	0.0524621		0.31275	-0.183198	0.0472362		0.312934	-0.014546	0.0243839		0.31282	-0.068408	0.0667992
0.313724	-0.013565	0.0524835		0.313582	-0.184843	0.0471308		0.313767	-0.015133	0.024341		0.313652	-0.068871	0.0667673
0.314556	-0.015796	0.0523055		0.314414	-0.18579	0.0470702		0.314599	-0.01583	0.02429		0.314484	-0.069619	0.0667158
0.315388	-0.018087	0.0521226		0.315245	-0.186378	0.0470325		0.315431	-0.01677	0.0242212		0.315315	-0.070726	0.0666395
0.31622	-0.018833	0.052063		0.316077	-0.186491	0.0470253		0.316264	-0.016794	0.0242195		0.316147	-0.071192	0.0666074
0.317052	-0.019126	0.0520396		0.316909	-0.186381	0.0470324		0.317096	-0.016634	0.0242312		0.316979	-0.072431	0.066522
0.317884	-0.019191	0.0520344		0.317741	-0.186321	0.0470362		0.317928	-0.01694	0.0242088		0.317811	-0.073577	0.0664431
0.318717	-0.021052	0.0518859		0.318572	-0.185046	0.0471178		0.31876	-0.017531	0.0241655		0.318643	-0.074217	0.066399
0.319549	-0.021202	0.0518739		0.319404	-0.184463	0.0471552		0.319593	-0.018191	0.0241173		0.319475	-0.075349	0.066321
0.320381	-0.02103	0.0518876		0.320236	-0.185763	0.0470719		0.320425	-0.018044	0.024128		0.320307	-0.076133	0.0662669
0.321213	-0.021532	0.0518476		0.321068	-0.187088	0.0469871		0.321257	-0.019404	0.0240285		0.321139	-0.076323	0.0662538
0.322045	-0.02403	0.0516482		0.3219	-0.186974	0.0469944		0.322089	-0.019451	0.0240251		0.321971	-0.076205	0.066262
0.322877	-0.024617	0.0516013		0.322731	-0.187629	0.0469524		0.322922	-0.019013	0.0240571		0.322803	-0.076682	0.0662291
0.32371	-0.026201	0.0514749		0.323563	-0.188928	0.0468693		0.323754	-0.018473	0.0240966		0.323635	-0.076528	0.0662397
0.324542	-0.026209	0.0514742		0.324395	-0.188945	0.0468682		0.324586	-0.01717	0.024192		0.324467	-0.076657	0.0662308
0.325374	-0.025726	0.0515128		0.325227	-0.188053	0.0469253		0.325419	-0.016762	0.0242218		0.325299	-0.076695	0.0662282
0.326206	-0.02568	0.0515164		0.326058	-0.18905	0.0468615		0.326251	-0.016135	0.0242677		0.326131	-0.076534	0.0662393
0.327038	-0.025193	0.0515553		0.32689	-0.19074	0.0467533		0.327083	-0.016468	0.0242433		0.326963	-0.076797	0.0662212
0.32787	-0.026837	0.0514241		0.327722	-0.191107	0.0467298		0.327915	-0.017586	0.0241615		0.327795	-0.077206	0.066193
0.328702	-0.028593	0.0512839		0.328554	-0.191648	0.0466951		0.328748	-0.019653	0.0240103		0.328627	-0.076384	0.0662496
0.329535	-0.02867	0.0512778		0.329386	-0.192191	0.0466604		0.32958	-0.019328	0.0240341		0.329459	-0.077341	0.0661837
0.330367	-0.03025	0.0511516		0.330217	-0.192847	0.0466183		0.330412	-0.018879	0.0240669		0.330291	-0.078745	0.066087
0.331199	-0.030467	0.0511343		0.331049	-0.193592	0.0465706		0.331244	-0.019338	0.0240334		0.331123	-0.077293	0.066187
0.332031	-0.031053	0.0510875		0.331881	-0.196147	0.0464071		0.332077	-0.021079	0.023906		0.331955	-0.077014	0.0662062
0.332863	-0.031198	0.051076		0.332713	-0.19756	0.0463166		0.332909	-0.022864	0.0237754		0.332787	-0.080031	0.0659983
0.333695	-0.032095	0.0510044		0.333545	-0.198566	0.0462522		0.333741	-0.025477	0.0235843		0.333619	-0.080757	0.0659483
0.334528	-0.034317	0.050827		0.334376	-0.199122	0.0462166		0.334574	-0.027351	0.0234472		0.334451	-0.082364	0.0658376
0.33536	-0.035165	0.0507593		0.335208	-0.199267	0.0462073		0.335406	-0.027683	0.0234229		0.335283	-0.082751	0.0658109
0.336192	-0.03558	0.0507262		0.33604	-0.201194	0.0460839		0.336238	-0.026855	0.0234835		0.336115	-0.084004	0.0657246
0.337024	-0.035375	0.0507425		0.336872	-0.203689	0.0459242		0.33707	-0.028284	0.023379		0.336947	-0.083586	0.0657534
0.337856	-0.035646	0.0507209		0.337703	-0.206694	0.0457318		0.337903	-0.029215	0.0233109		0.337779	-0.082491	0.0658288
0.338688	-0.035663	0.0507195		0.338535	-0.208542	0.0456134		0.338735	-0.030492	0.0232174		0.338611	-0.08173	0.0658813
0.339521	-0.035025	0.0507705		0.339367	-0.210633	0.0454795		0.339567	-0.031932	0.0231121		0.339443	-0.081852	0.0658729
0.340353	-0.035334	0.0507458		0.340199	-0.212535	0.0453578		0.340399	-0.032137	0.0230971		0.340274	-0.082326	0.0658402
0.341185	-0.035994	0.0506931		0.341031	-0.212205	0.0453789		0.341232	-0.032004	0.0231068		0.341106	-0.082731	0.0658123
0.342017	-0.036279	0.0506704		0.341862	-0.2132	0.0453152		0.342064	-0.031902	0.0231143		0.341938	-0.084341	0.0657014
0.342849	-0.035025	0.0507705		0.342694	-0.214456	0.0452348		0.342896	-0.032951	0.0230376		0.34277	-0.086715	0.0655378
0.343681	-0.03583	0.0507062		0.343526	-0.215763	0.0451511		0.343729	-0.034796	0.0229026		0.343602	-0.086941	0.0655222
0.344513	-0.035883	0.050702		0.344358	-0.215769	0.0451507		0.344561	-0.036582	0.022772		0.344434	-0.088559	0.0654107
0.345346	-0.036394	0.0506612		0.345189	-0.21628	0.045118		0.345393	-0.039376	0.0225676		0.345266	-0.089831	0.0653231
0.346178	-0.036378	0.0506625		0.346021	-0.218114	0.0450005		0.346225	-0.041625	0.0224031		0.346098	-0.089831	0.0653231
0.34701	-0.035833	0.050706		0.346853	-0.219066	0.0449396		0.347058	-0.043364	0.0222758		0.34693	-0.091396	0.0652152
0.347842	-0.036543	0.0506493		0.347685	-0.218816	0.0449556		0.34789	-0.044256	0.0222106		0.347762	-0.091342	0.0652189
0.348674	-0.037785	0.0505501		0.348517	-0.219648	0.0449023		0.348722	-0.043729	0.0222491		0.348594	-0.09184	0.0651846
0.349506	-0.037281	0.0505904		0.349348	-0.218874	0.0449519		0.349554	-0.041688	0.0223984		0.349426	-0.093497	0.0650704
0.350339	-0.036038	0.0506896		0.35018	-0.219329	0.0449228		0.350387	-0.042787	0.0223181		0.350258	-0.094103	0.0650287
0.351171	-0.035103	0.0507642		0.351012	-0.219635	0.0449032		0.351219	-0.043616	0.0222574		0.35109	-0.09262	0.0651309
0.352003	-0.035012	0.0507715		0.351844	-0.220532	0.0448457		0.352051	-0.044703	0.0221779		0.351922	-0.093189	0.0650917
0.352835	-0.034138	0.0508413		0.352675	-0.221537	0.0447814		0.352884	-0.044083	0.0222233		0.352754	-0.094015	0.0650348
0.353667	-0.035065	0.0507673		0.353507	-0.22134	0.044794		0.353716	-0.043424	0.0222715		0.353586	-0.093113	0.0650969
0.354499	-0.034944	0.0507769		0.354339	-0.221714	0.04477		0.354548	-0.041358	0.0224226		0.354418	-0.093759	0.0650524
0.355332	-0.033503	0.050892		0.355171	-0.222669	0.0447089		0.35538	-0.040492	0.0224859		0.35525	-0.094086	0.0650299
0.356164	-0.031653	0.0510396		0.356003	-0.224458	0.0445944		0.356213	-0.040762	0.0224662		0.356082	-0.095167	0.0649554
0.356996	-0.030985	0.051093		0.356834	-0.224531	0.0445897		0.357045	-0.041714	0.0223965		0.356914	-0.095053	0.0649632
0.357828	-0.031559	0.0510471		0.357666	-0.223584	0.0446503		0.357877	-0.041237	0.0224314		0.357746	-0.095854	0.064908
0.35866	-0.031362	0.0510629		0.358498	-0.22286	0.0446967		0.358709	-0.041699	0.0223976		0.358578	-0.096892	0.0648365
0.359492	-0.032154	0.0509996		0.35933	-0.2224	0.0447261		0.359542	-0.041481	0.0224136		0.35941	-0.097483	0.0647958
0.360324	-0.032718	0.0509546		0.360162	-0.220001	0.0448797		0.360374	-0.040934	0.0224536		0.360242	-0.097615	0.0647867
0.361157	-0.032698	0.0509562		0.360993	-0.220035	0.0448775		0.361206	-0.041794	0.0223907		0.361074	-0.098955	0.0646944
0.361989	-0.031412	0.0510589		0.361825	-0.220456	0.0448506		0.362039	-0.043301	0.0222805		0.361906	-0.100046	0.0646192
0.362821	-0.031256	0.0510713		0.362657	-0.220239	0.0448645		0.362871	-0.042344	0.0223505		0.362738	-0.100193	0.064609
0.363653	-0.031579	0.0510455		0.363489	-0.219872	0.044888		0.363703	-0.040806	0.022463		0.36357	-0.099484	0.0646579
0.364485	-0.030616	0.0511224		0.36432	-0.219435	0.044916		0.364535	-0.040259	0.022503		0.364402	-0.100189	0.0646093
0.365317	-0.030293	0.0511482		0.365152	-0.219733	0.0448969		0.365368	-0.041477	0.0224139		0.365234	-0.100849	0.0645638
0.36615	-0.030058	0.051167		0.365984	-0.220658	0.0448377		0.3662	-0.04116	0.0224371		0.366065	-0.101576	0.0645138
0.366982	-0.031509	0.0510511		0.366816	-0.221382	0.0447913		0.367032	-0.040559	0.022481		0.366897	-0.103315	0.0643939
0.367814	-0.031061	0.0510869		0.367648	-0.220566	0.0448435		0.367864	-0.040185	0.0225084		0.367729	-0.103099	0.0644088
0.368646	-0.030775	0.0511097		0.368479	-0.220089	0.0448741		0.368697	-0.040603	0.0224778		0.368561	-0.104472	0.0643142
0.369478	-0.029117	0.0512421		0.369311	-0.220443	0.0448514		0.369529	-0.04143	0.0224173		0.369393	-0.105335	0.0642547
0.37031	-0.028259	0.0513106		0.370143	-0.222112	0.0447446		0.370361	-0.043381	0.0222746		0.370225	-0.107372	0.0641144
0.371143	-0.028543	0.0512879		0.370975	-0.223071	0.0446832		0.371194	-0.043518	0.0222646		0.371057	-0.107919	0.0640767
0.371975	-0.029453	0.0512153		0.371806	-0.223476	0.0446572		0.372026	-0.043281	0.0222819		0.371889	-0.109474	0.0639695
0.372807	-0.031739	0.0510328		0.372638	-0.223576	0.0446508		0.372858	-0.042287	0.0223546		0.372721	-0.111235	0.0638482
0.373639	-0.033174	0.0509182		0.37347	-0.223111	0.0446806		0.37369	-0.0433	0.0222805		0.373553	-0.110915	0.0638702
0.374471	-0.032341	0.0509847		0.374302	-0.223979	0.044625		0.374523	-0.044316	0.0222062		0.374385	-0.110845	0.0638751
0.375303	-0.032721	0.0509544		0.375134	-0.224889	0.0445668		0.375355	-0.046135	0.0220731		0.375217	-0.110427	0.0639039
0.376135	-0.032399	0.0509801		0.375965	-0.225168	0.0445489		0.376187	-0.045856	0.0220936		0.376049	-0.110578	0.0638935
0.376968	-0.034127	0.0508422		0.376797	-0.224374	0.0445997		0.377019	-0.045868	0.0220927		0.376881	-0.109413	0.0639737
0.3778	-0.033588	0.0508852		0.377629	-0.223286	0.0446694		0.377852	-0.046453	0.0220499		0.377713	-0.109445	0.0639715
0.378632	-0.032744	0.0509526		0.378461	-0.223296	0.0446688		0.378684	-0.047169	0.0219975		0.378545	-0.111614	0.0638221
0.379464	-0.033136	0.0509213		0.379293	-0.223558	0.044652		0.379516	-0.048996	0.0218639		0.379377	-0.113372	0.0637009
0.380296	-0.032508	0.0509714		0.380124	-0.223339	0.044666		0.380349	-0.050505	0.0217535		0.380209	-0.115464	0.0635568
0.381128	-0.031763	0.0510309		0.380956	-0.225172	0.0445486		0.381181	-0.050459	0.0217568		0.381041	-0.116155	0.0635092
0.381961	-0.032335	0.0509852		0.381788	-0.226136	0.0444869		0.382013	-0.050896	0.0217249		0.381873	-0.115824	0.063532
0.382793	-0.03231	0.0509872		0.38262	-0.225914	0.0445011		0.382845	-0.049705	0.021812		0.382705	-0.116219	0.0635048
0.383625	-0.031594	0.0510444		0.383451	-0.225972	0.0444974		0.383678	-0.050807	0.0217314		0.383537	-0.117068	0.0634463
0.384457	-0.031125	0.0510818		0.384283	-0.225655	0.0445177		0.38451	-0.05193	0.0216492		0.384369	-0.117826	0.063394
0.385289	-0.029792	0.0511882		0.385115	-0.226398	0.0444701		0.385342	-0.051754	0.0216621		0.385201	-0.117691	0.0634033
0.386121	-0.028662	0.0512784		0.385947	-0.226581	0.0444584		0.386174	-0.050585	0.0217476		0.386033	-0.118547	0.0633443
0.386954	-0.028599	0.0512834		0.386779	-0.22601	0.044495		0.387007	-0.050013	0.0217895		0.386865	-0.117834	0.0633935
0.387786	-0.027673	0.0513574		0.38761	-0.226271	0.0444783		0.387839	-0.050088	0.021784		0.387697	-0.117496	0.0634168
0.388618	-0.028285	0.0513085		0.388442	-0.226996	0.0444318		0.388671	-0.050981	0.0217187		0.388529	-0.118041	0.0633792
0.38945	-0.02834	0.0513041		0.389274	-0.227301	0.0444123		0.389504	-0.048845	0.0218749		0.389361	-0.11893	0.0633179
0.390282	-0.027309	0.0513864		0.390106	-0.226657	0.0444536		0.390336	-0.048991	0.0218642		0.390193	-0.118967	0.0633154
0.391114	-0.026218	0.0514735		0.390937	-0.225874	0.0445037		0.391168	-0.047601	0.0219659		0.391024	-0.117814	0.0633948
0.391946	-0.025456	0.0515343		0.391769	-0.225721	0.0445135		0.392	-0.047138	0.0219998		0.391856	-0.117725	0.063401
0.392779	-0.025359	0.0515421		0.392601	-0.225623	0.0445198		0.392833	-0.046159	0.0220714		0.392688	-0.118175	0.06337
0.393611	-0.023693	0.0516751		0.393433	-0.226186	0.0444837		0.393665	-0.046849	0.0220209		0.39352	-0.118423	0.0633529
0.394443	-0.021292	0.0518667		0.394265	-0.225286	0.0445413		0.394497	-0.046976	0.0220116		0.394352	-0.119079	0.0633077
0.395275	-0.021049	0.0518861		0.395096	-0.224212	0.0446101		0.395329	-0.046712	0.0220309		0.395184	-0.120029	0.0632422
0.396107	-0.019081	0.0520432		0.395928	-0.224231	0.0446089		0.396162	-0.046618	0.0220378		0.396016	-0.121665	0.0631295
0.396939	-0.017755	0.0521491		0.39676	-0.224866	0.0445682		0.396994	-0.045658	0.022108		0.396848	-0.122273	0.0630876
0.397772	-0.016176	0.0522751		0.397592	-0.225434	0.0445319		0.397826	-0.045185	0.0221426		0.39768	-0.12305	0.0630341
0.398604	-0.017425	0.0521754		0.398423	-0.226471	0.0444655		0.398659	-0.043983	0.0222306		0.398512	-0.125203	0.0628857
0.399436	-0.018018	0.0521281		0.399255	-0.227381	0.0444072		0.399491	-0.042238	0.0223582		0.399344	-0.125651	0.0628548
0.400268	-0.017826	0.0521434		0.400087	-0.228076	0.0443627		0.400323	-0.040187	0.0225082		0.400176	-0.125998	0.0628309
0.4011	-0.01793	0.0521351		0.400919	-0.229431	0.0442759		0.401155	-0.037771	0.022685		0.401008	-0.126178	0.0628185
0.401932	-0.018268	0.0521081		0.401751	-0.230193	0.0442271		0.401988	-0.037341	0.0227164		0.40184	-0.126549	0.0627929
0.402765	-0.017686	0.0521546		0.402582	-0.230229	0.0442248		0.40282	-0.035972	0.0228166		0.402672	-0.126948	0.0627655
0.403597	-0.018507	0.052089		0.403414	-0.231343	0.0441535		0.403652	-0.03533	0.0228635		0.403504	-0.12776	0.0627095
0.404429	-0.017974	0.0521316		0.404246	-0.231142	0.0441664		0.404484	-0.034759	0.0229053		0.404336	-0.128033	0.0626907
0.405261	-0.018119	0.05212		0.405078	-0.232668	0.0440687		0.405317	-0.033797	0.0229757		0.405168	-0.128355	0.0626685
0.406093	-0.017741	0.0521502		0.40591	-0.231518	0.0441423		0.406149	-0.033267	0.0230144		0.406	-0.129402	0.0625964
0.406925	-0.017734	0.0521507		0.406741	-0.231167	0.0441648		0.406981	-0.033555	0.0229934		0.406832	-0.129699	0.0625759
0.407757	-0.01673	0.0522309		0.407573	-0.231925	0.0441163		0.407814	-0.033393	0.0230052		0.407664	-0.131403	0.0624585
0.40859	-0.016129	0.0522789		0.408405	-0.232768	0.0440623		0.408646	-0.03278	0.0230501		0.408496	-0.133571	0.0623091
0.409422	-0.016738	0.0522303		0.409237	-0.23346	0.044018		0.409478	-0.03195	0.0231108		0.409328	-0.133929	0.0622844
0.410254	-0.016955	0.0522129		0.410068	-0.233936	0.0439875		0.41031	-0.031427	0.023149		0.41016	-0.133863	0.062289
0.411086	-0.017758	0.0521488		0.4109	-0.233999	0.0439835		0.411143	-0.030543	0.0232137		0.410992	-0.134121	0.0622712
0.411918	-0.01867	0.052076		0.411732	-0.234144	0.0439742		0.411975	-0.030511	0.0232161		0.411824	-0.1356	0.0621693
0.41275	-0.01866	0.0520768		0.412564	-0.235053	0.043916		0.412807	-0.030026	0.0232515		0.412656	-0.136829	0.0620846
0.413583	-0.018079	0.0521232		0.413396	-0.236252	0.0438392		0.413639	-0.029975	0.0232553		0.413488	-0.136919	0.0620784
0.414415	-0.017404	0.0521771		0.414227	-0.236185	0.0438435		0.414472	-0.028448	0.023367		0.41432	-0.136286	0.062122
0.415247	-0.017939	0.0521344		0.415059	-0.237137	0.0437825		0.415304	-0.026231	0.0235291		0.415152	-0.136574	0.0621022
0.416079	-0.017487	0.0521705		0.415891	-0.238353	0.0437047		0.416136	-0.025424	0.0235882		0.415983	-0.136543	0.0621043
0.416911	-0.018641	0.0520783		0.416723	-0.238273	0.0437098		0.416969	-0.023974	0.0236942		0.416815	-0.135496	0.0621764
0.417743	-0.020004	0.0519695		0.417554	-0.23705	0.0437881		0.417801	-0.023142	0.0237551		0.417647	-0.135125	0.062202
0.418576	-0.019765	0.0519886		0.418386	-0.235782	0.0438693		0.418633	-0.022097	0.0238315		0.418479	-0.135819	0.0621542
0.419408	-0.018733	0.052071		0.419218	-0.236199	0.0438426		0.419465	-0.021403	0.0238823		0.419311	-0.135761	0.0621582
0.42024	-0.017516	0.0521682		0.42005	-0.236845	0.0438012		0.420298	-0.021803	0.023853		0.420143	-0.135399	0.0621831
0.421072	-0.017251	0.0521893		0.420882	-0.236988	0.0437921		0.42113	-0.020957	0.0239149		0.420975	-0.134836	0.0622219
0.421904	-0.01722	0.0521918		0.421713	-0.23661	0.0438163		0.421962	-0.020393	0.0239562		0.421807	-0.135319	0.0621886
0.422736	-0.017758	0.0521488		0.422545	-0.235794	0.0438685		0.422794	-0.020175	0.0239721		0.422639	-0.135324	0.0621883
0.423568	-0.017894	0.052138		0.423377	-0.235249	0.0439034		0.423627	-0.020436	0.023953		0.423471	-0.134209	0.0622651
0.424401	-0.018269	0.052108		0.424209	-0.234732	0.0439365		0.424459	-0.020861	0.023922		0.424303	-0.132989	0.0623492
0.425233	-0.017632	0.0521589		0.425041	-0.234701	0.0439385		0.425291	-0.02022	0.0239688		0.425135	-0.132358	0.0623927
0.426065	-0.016936	0.0522145		0.425872	-0.234297	0.0439644		0.426124	-0.020381	0.0239571		0.425967	-0.131644	0.0624419
0.426897	-0.01859	0.0520824		0.426704	-0.235278	0.0439016		0.426956	-0.020128	0.0239756		0.426799	-0.132149	0.0624071
0.427729	-0.019503	0.0520095		0.427536	-0.236226	0.0438409		0.427788	-0.018212	0.0241157		0.427631	-0.13259	0.0623767
0.428561	-0.020091	0.0519626		0.428368	-0.237047	0.0437883		0.42862	-0.017472	0.0241699		0.428463	-0.130998	0.0624864
0.429394	-0.020347	0.0519422		0.429199	-0.237226	0.0437768		0.429453	-0.016504	0.0242407		0.429295	-0.128853	0.0626342
0.430226	-0.018995	0.0520501		0.430031	-0.236403	0.0438295		0.430285	-0.01616	0.0242658		0.430127	-0.128405	0.0626651
0.431058	-0.018111	0.0521207		0.430863	-0.236178	0.0438439		0.431117	-0.01644	0.0242454		0.430959	-0.128075	0.0626878
0.43189	-0.018439	0.0520945		0.431695	-0.237315	0.0437711		0.431949	-0.01518	0.0243375		0.431791	-0.127713	0.0627127
0.432722	-0.018393	0.0520981		0.432527	-0.237093	0.0437854		0.432782	-0.015344	0.0243255		0.432623	-0.1283	0.0626723
0.433554	-0.018812	0.0520647		0.433358	-0.236377	0.0438312		0.433614	-0.014958	0.0243538		0.433455	-0.128488	0.0626593
0.434387	-0.019239	0.0520306		0.43419	-0.235623	0.0438795		0.434446	-0.015286	0.0243298		0.434287	-0.129603	0.0625825
0.435219	-0.018711	0.0520728		0.435022	-0.236868	0.0437998		0.435279	-0.014715	0.0243715		0.435119	-0.130868	0.0624953
0.436051	-0.018756	0.0520692		0.435854	-0.238914	0.0436688		0.436111	-0.015534	0.0243116		0.435951	-0.131627	0.062443
0.436883	-0.020156	0.0519574		0.436685	-0.23956	0.0436274		0.436943	-0.014853	0.0243614		0.436783	-0.132207	0.0624031
0.437715	-0.020232	0.0519513		0.437517	-0.239918	0.0436045		0.437775	-0.014467	0.0243897		0.437615	-0.132453	0.0623861
0.438547	-0.020296	0.0519462		0.438349	-0.241691	0.043491		0.438608	-0.015651	0.0243031		0.438447	-0.133374	0.0623227
0.43938	-0.020739	0.0519109		0.439181	-0.242582	0.0434339		0.43944	-0.016431	0.024246		0.439279	-0.133071	0.0623435
0.440212	-0.020708	0.0519133		0.440013	-0.241875	0.0434792		0.440272	-0.016012	0.0242767		0.440111	-0.132878	0.0623568
0.441044	-0.02198	0.0518118		0.440844	-0.241259	0.0435186		0.441104	-0.015299	0.0243288		0.440942	-0.133523	0.0623124
0.441876	-0.022188	0.0517952		0.441676	-0.241501	0.0435031		0.441937	-0.01447	0.0243895		0.441774	-0.133003	0.0623482
0.442708	-0.021507	0.0518496		0.442508	-0.241065	0.043531		0.442769	-0.014926	0.0243561		0.442606	-0.132355	0.0623929
0.44354	-0.020726	0.0519119		0.44334	-0.24145	0.0435064		0.443601	-0.015604	0.0243065		0.443438	-0.133259	0.0623306
0.444372	-0.020089	0.0519628		0.444171	-0.242513	0.0434383		0.444434	-0.015717	0.0242982		0.44427	-0.135592	0.0621698
0.445205	-0.019761	0.0519889		0.445003	-0.243631	0.0433667		0.445266	-0.014314	0.0244009		0.445102	-0.138309	0.0619826
0.446037	-0.021002	0.0518899		0.445835	-0.245021	0.0432777		0.446098	-0.014342	0.0243988		0.445934	-0.13969	0.0618874
0.446869	-0.022535	0.0517675		0.446667	-0.246052	0.0432117		0.44693	-0.014488	0.0243881		0.446766	-0.140238	0.0618497
0.447701	-0.022665	0.0517571		0.447499	-0.245881	0.0432227		0.447763	-0.015608	0.0243062		0.447598	-0.140695	0.0618182
0.448533	-0.022316	0.051785		0.44833	-0.246631	0.0431747		0.448595	-0.015308	0.0243282		0.44843	-0.140956	0.0618002
0.449365	-0.022931	0.0517359		0.449162	-0.246285	0.0431968		0.449427	-0.015437	0.0243187		0.449262	-0.141994	0.0617287
0.450198	-0.023201	0.0517143		0.449994	-0.246555	0.0431795		0.450259	-0.015965	0.0242801		0.450094	-0.143654	0.0616143
0.45103	-0.024272	0.0516288		0.450826	-0.247654	0.0431092		0.451092	-0.017121	0.0241955		0.450926	-0.144859	0.0615313
0.451862	-0.024547	0.0516069		0.451658	-0.247507	0.0431186		0.451924	-0.017129	0.024195		0.451758	-0.145733	0.061471
0.452694	-0.024605	0.0516023		0.452489	-0.246918	0.0431563		0.452756	-0.018564	0.02409		0.45259	-0.146566	0.0614136
0.453526	-0.0246	0.0516027		0.453321	-0.247892	0.0430939		0.453589	-0.018057	0.0241271		0.453422	-0.14649	0.0614189
0.454358	-0.024921	0.051577		0.454153	-0.249229	0.0430083		0.454421	-0.017832	0.0241435		0.454254	-0.146128	0.0614438
0.455191	-0.024417	0.0516173		0.454985	-0.250672	0.0429159		0.455253	-0.017369	0.0241774		0.455086	-0.145807	0.0614659
0.456023	-0.025356	0.0515423		0.455816	-0.250252	0.0429428		0.456085	-0.018837	0.02407		0.455918	-0.145391	0.0614946
0.456855	-0.025704	0.0515145		0.456648	-0.24953	0.042989		0.456918	-0.018952	0.0240616		0.45675	-0.145286	0.0615018
0.457687	-0.025393	0.0515394		0.45748	-0.250301	0.0429397		0.45775	-0.018595	0.0240877		0.457582	-0.144914	0.0615275
0.458519	-0.02496	0.0515739		0.458312	-0.251107	0.0428881		0.458582	-0.018294	0.0241097		0.458414	-0.144776	0.061537
0.459351	-0.025287	0.0515478		0.459144	-0.25021	0.0429455		0.459414	-0.018768	0.0240751		0.459246	-0.145328	0.061499
0.460183	-0.026363	0.0514619		0.459975	-0.251133	0.0428864		0.460247	-0.018467	0.0240971		0.460078	-0.146137	0.0614432
0.461016	-0.027062	0.0514061		0.460807	-0.252418	0.0428041		0.461079	-0.019253	0.0240396		0.46091	-0.146775	0.0613992
0.461848	-0.026984	0.0514124		0.461639	-0.252849	0.0427765		0.461911	-0.019743	0.0240037		0.461742	-0.14723	0.0613679
0.46268	-0.026854	0.0514227		0.462471	-0.252455	0.0428018		0.462744	-0.020297	0.0239632		0.462574	-0.147962	0.0613175
0.463512	-0.027563	0.0513661		0.463302	-0.253531	0.0427329		0.463576	-0.019536	0.0240189		0.463406	-0.148396	0.0612875
0.464344	-0.028342	0.0513039		0.464134	-0.255146	0.0426295		0.464408	-0.018309	0.0241086		0.464238	-0.147926	0.0613199
0.465176	-0.028651	0.0512793		0.464966	-0.25499	0.0426394		0.46524	-0.018413	0.024101		0.46507	-0.14712	0.0613755
0.466009	-0.028225	0.0513133		0.465798	-0.255201	0.0426259		0.466073	-0.019378	0.0240304		0.465902	-0.146488	0.061419
0.466841	-0.028408	0.0512987		0.46663	-0.25537	0.0426151		0.466905	-0.01862	0.0240859		0.466733	-0.14696	0.0613865
0.467673	-0.027841	0.0513439		0.467461	-0.255392	0.0426137		0.467737	-0.018333	0.0241069		0.467565	-0.148018	0.0613136
0.468505	-0.026853	0.0514228		0.468293	-0.256341	0.0425529		0.468569	-0.017676	0.0241549		0.468397	-0.148752	0.061263
0.469337	-0.026912	0.0514181		0.469125	-0.2568	0.0425235		0.469402	-0.017333	0.02418		0.469229	-0.149187	0.061233
0.470169	-0.027363	0.0513821		0.469957	-0.257011	0.04251		0.470234	-0.016929	0.0242096		0.470061	-0.149781	0.0611921
0.471002	-0.028108	0.0513226		0.470789	-0.25696	0.0425133		0.471066	-0.016757	0.0242222		0.470893	-0.149552	0.0612079
0.471834	-0.028349	0.0513034		0.47162	-0.257204	0.0424977		0.471899	-0.015479	0.0243156		0.471725	-0.150324	0.0611547
0.472666	-0.028555	0.0512869		0.472452	-0.258361	0.0424236		0.472731	-0.014269	0.0244042		0.472557	-0.151186	0.0610953
0.473498	-0.028765	0.0512702		0.473284	-0.26003	0.0423167		0.473563	-0.01309	0.0244904		0.473389	-0.151742	0.061057
0.47433	-0.028728	0.0512731		0.474116	-0.262073	0.0421859		0.474395	-0.012755	0.0245149		0.474221	-0.151004	0.0611078
0.475162	-0.028496	0.0512917		0.474947	-0.262695	0.0421461		0.475228	-0.012445	0.0245376		0.475053	-0.15035	0.0611529
0.475994	-0.02871	0.0512746		0.475779	-0.26159	0.0422169		0.47606	-0.012104	0.0245625		0.475885	-0.150763	0.0611244
0.476827	-0.027897	0.0513395		0.476611	-0.261482	0.0422238		0.476892	-0.010383	0.0246884		0.476717	-0.151394	0.061081
0.477659	-0.027665	0.051358		0.477443	-0.261683	0.0422109		0.477724	-0.009653	0.0247418		0.477549	-0.152255	0.0610216
0.478491	-0.027464	0.051374		0.478275	-0.261865	0.0421992		0.478557	-0.010438	0.0246844		0.478381	-0.153461	0.0609385
0.479323	-0.027283	0.0513885		0.479106	-0.263041	0.0421239		0.479389	-0.010541	0.0246769		0.479213	-0.155171	0.0608207
0.480155	-0.027647	0.0513594		0.479938	-0.264059	0.0420588		0.480221	-0.008382	0.0248348		0.480045	-0.155547	0.0607948
0.480987	-0.027326	0.0513851		0.48077	-0.264697	0.0420179		0.481054	-0.008778	0.0248058		0.480877	-0.156036	0.0607611
0.48182	-0.027559	0.0513665		0.481602	-0.265553	0.0419631		0.481886	-0.008151	0.0248517		0.481709	-0.155776	0.060779
0.482652	-0.02735	0.0513831		0.482433	-0.26602	0.0419332		0.482718	-0.007038	0.0249331		0.482541	-0.154839	0.0608436
0.483484	-0.028	0.0513312		0.483265	-0.266435	0.0419066		0.48355	-0.006762	0.0249533		0.483373	-0.156205	0.0607495
0.484316	-0.028069	0.0513257		0.484097	-0.266814	0.0418824		0.484383	-0.007719	0.0248833		0.484205	-0.158006	0.0606254
0.485148	-0.027682	0.0513566		0.484929	-0.266296	0.0419155		0.485215	-0.007874	0.024872		0.485037	-0.158451	0.0605947
0.48598	-0.028556	0.0512869		0.485761	-0.267053	0.0418671		0.486047	-0.008216	0.0248469		0.485869	-0.159113	0.0605491
0.486813	-0.029428	0.0512173		0.486592	-0.267574	0.0418337		0.486879	-0.007641	0.024889		0.486701	-0.15954	0.0605197
0.487645	-0.029694	0.051196		0.487424	-0.26655	0.0418993		0.487712	-0.008258	0.0248439		0.487533	-0.159207	0.0605426
0.488477	-0.030653	0.0511195		0.488256	-0.266763	0.0418856		0.488544	-0.007833	0.024875		0.488365	-0.159263	0.0605387
0.489309	-0.031581	0.0510454		0.489088	-0.267411	0.0418441		0.489376	-0.008472	0.0248282		0.489197	-0.158893	0.0605642
0.490141	-0.031417	0.0510585		0.489919	-0.267935	0.0418106		0.490209	-0.008482	0.0248275		0.490029	-0.159219	0.0605418
0.490973	-0.030791	0.0511085		0.490751	-0.268833	0.0417531		0.491041	-0.009784	0.0247322		0.490861	-0.15958	0.0605169
0.491805	-0.029642	0.0512002		0.491583	-0.268783	0.0417563		0.491873	-0.00911	0.0247815		0.491692	-0.160756	0.0604359
0.492638	-0.02946	0.0512147		0.492415	-0.26887	0.0417507		0.492705	-0.008351	0.0248371		0.492524	-0.160885	0.060427
0.49347	-0.029315	0.0512263		0.493247	-0.269863	0.0416871		0.493538	-0.009332	0.0247653		0.493356	-0.161327	0.0603965
0.494302	-0.02837	0.0513017		0.494078	-0.269986	0.0416793		0.49437	-0.008569	0.0248211		0.494188	-0.162172	0.0603383
0.495134	-0.028803	0.0512671		0.49491	-0.2683	0.0417872		0.495202	-0.008256	0.024844		0.49502	-0.164817	0.060156
0.495966	-0.028476	0.0512933		0.495742	-0.26727	0.0418532		0.496034	-0.008197	0.0248483		0.495852	-0.165844	0.0600853
0.496798	-0.027917	0.0513379		0.496574	-0.268101	0.0418		0.496867	-0.007877	0.0248717		0.496684	-0.166129	0.0600656
0.497631	-0.029628	0.0512013		0.497406	-0.267847	0.0418162		0.497699	-0.008355	0.0248368		0.497516	-0.166682	0.0600275
0.498463	-0.029504	0.0512112		0.498237	-0.268467	0.0417765		0.498531	-0.01053	0.0246777		0.498348	-0.167255	0.059988
0.499295	-0.029027	0.0512493		0.499069	-0.268722	0.0417602		0.499364	-0.009899	0.0247238		0.49918	-0.167609	0.0599636
0.500127	-0.028443	0.0512959		0.499901	-0.268593	0.0417685		0.500196	-0.010961	0.0246461		0.500012	-0.167243	0.0599889
0.500959	-0.027368	0.0513817		0.500733	-0.269254	0.0417261		0.501028	-0.012912	0.0245034		0.500844	-0.167085	0.0599998
0.501791	-0.027473	0.0513733		0.501564	-0.268924	0.0417473		0.50186	-0.012905	0.0245039		0.501676	-0.16731	0.0599842
0.502623	-0.028396	0.0512996		0.502396	-0.267494	0.0418388		0.502693	-0.014461	0.0243901		0.502508	-0.167675	0.0599591
0.503456	-0.029725	0.0511935		0.503228	-0.26683	0.0418813		0.503525	-0.015499	0.0243142		0.50334	-0.169101	0.0598608
0.504288	-0.029799	0.0511876		0.50406	-0.267019	0.0418692		0.504357	-0.015505	0.0243137		0.504172	-0.168548	0.0598989
0.50512	-0.03038	0.0511413		0.504892	-0.267699	0.0418257		0.505189	-0.014619	0.0243786		0.505004	-0.167018	0.0600044
0.505952	-0.030688	0.0511167		0.505723	-0.268249	0.0417905		0.506022	-0.013611	0.0244523		0.505836	-0.166821	0.0600179
0.506784	-0.029727	0.0511934		0.506555	-0.267843	0.0418165		0.506854	-0.012347	0.0245448		0.506668	-0.167052	0.060002
0.507616	-0.030088	0.0511646		0.507387	-0.268848	0.0417521		0.507686	-0.012208	0.0245549		0.5075	-0.167507	0.0599707
0.508449	-0.030192	0.0511563		0.508219	-0.270288	0.0416599		0.508519	-0.012314	0.0245472		0.508332	-0.168193	0.0599234
0.509281	-0.030417	0.0511383		0.50905	-0.270128	0.0416702		0.509351	-0.011934	0.024575		0.509164	-0.168764	0.0598841
0.510113	-0.030096	0.0511639		0.509882	-0.270125	0.0416704		0.510183	-0.010716	0.0246641		0.509996	-0.169278	0.0598486
0.510945	-0.029615	0.0512023		0.510714	-0.269803	0.041691		0.511015	-0.010727	0.0246633		0.510828	-0.1696	0.0598265
0.511777	-0.029483	0.0512129		0.511546	-0.269065	0.0417382		0.511848	-0.009022	0.024788		0.51166	-0.169194	0.0598544
0.512609	-0.030127	0.0511615		0.512378	-0.269012	0.0417416		0.51268	-0.00911	0.0247815		0.512492	-0.169306	0.0598467
0.513442	-0.030915	0.0510986		0.513209	-0.268761	0.0417577		0.513512	-0.00911	0.0247815		0.513324	-0.169299	0.0598472
0.514274	-0.031859	0.0510232		0.514041	-0.26805	0.0418032		0.514344	-0.009545	0.0247497		0.514156	-0.16842	0.0599078
0.515106	-0.032348	0.0509842		0.514873	-0.268006	0.041806		0.515177	-0.009279	0.0247692		0.514988	-0.16765	0.0599608
0.515938	-0.031534	0.0510491		0.515705	-0.269056	0.0417388		0.516009	-0.008355	0.0248368		0.51582	-0.166787	0.0600203
0.51677	-0.032663	0.050959		0.516537	-0.270002	0.0416782		0.516841	-0.008949	0.0247933		0.516652	-0.16675	0.0600228
0.517602	-0.033432	0.0508976		0.517368	-0.270239	0.0416631		0.517674	-0.008869	0.0247992		0.517483	-0.167394	0.0599785
0.518435	-0.03294	0.0509369		0.5182	-0.271426	0.0415871		0.518506	-0.008464	0.0248288		0.518315	-0.167199	0.0599919
0.519267	-0.03379	0.0508691		0.519032	-0.271164	0.0416038		0.519338	-0.005942	0.0250133		0.519147	-0.166662	0.0600289
0.520099	-0.035176	0.0507584		0.519864	-0.271013	0.0416135		0.52017	-0.004563	0.0251142		0.519979	-0.166413	0.0600461
0.520931	-0.036393	0.0506613		0.520695	-0.271109	0.0416074		0.521003	-0.003726	0.0251754		0.520811	-0.167653	0.0599606
0.521763	-0.037135	0.050602		0.521527	-0.27102	0.0416131		0.521835	-0.004337	0.0251307		0.521643	-0.168406	0.0599087
0.522595	-0.036738	0.0506337		0.522359	-0.271403	0.0415885		0.522667	-0.003091	0.0252218		0.522475	-0.168654	0.0598916
0.523427	-0.0356	0.0507246		0.523191	-0.272218	0.0415364		0.523499	-0.002001	0.0253016		0.523307	-0.169179	0.0598555
0.52426	-0.034493	0.0508129		0.524023	-0.27314	0.0414773		0.524332	-0.00174	0.0253207		0.524139	-0.169441	0.0598374
0.525092	-0.03405	0.0508483		0.524854	-0.273147	0.0414769		0.525164	-0.000839	0.0253866		0.524971	-0.170943	0.0597339
0.525924	-0.033811	0.0508674		0.525686	-0.272412	0.0415239		0.525996	-0.001567	0.0253333		0.525803	-0.172774	0.0596077
0.526756	-0.033812	0.0508673		0.526518	-0.271743	0.0415668		0.526829	-0.002065	0.0252969		0.526635	-0.174185	0.0595105
0.527588	-0.034938	0.0507774		0.52735	-0.270979	0.0416157		0.527661	-0.002539	0.0252622		0.527467	-0.174139	0.0595137
0.52842	-0.03542	0.0507389		0.528181	-0.270857	0.0416235		0.528493	-0.003756	0.0251732		0.528299	-0.173142	0.0595824
0.529253	-0.034762	0.0507915		0.529013	-0.270359	0.0416554		0.529325	-0.003916	0.0251615		0.529131	-0.173025	0.0595904
0.530085	-0.034083	0.0508457		0.529845	-0.271103	0.0416078		0.530158	-0.004238	0.0251379		0.529963	-0.173645	0.0595477
0.530917	-0.034111	0.0508434		0.530677	-0.271788	0.0415639		0.53099	-0.004422	0.0251245		0.530795	-0.173909	0.0595295
0.531749	-0.035357	0.050744		0.531509	-0.272184	0.0415385		0.531822	-0.005103	0.0250747		0.531627	-0.174295	0.0595029
0.532581	-0.035796	0.0507089		0.53234	-0.27217	0.0415394		0.532654	-0.005258	0.0250633		0.532459	-0.174773	0.05947
0.533413	-0.035329	0.0507462		0.533172	-0.272323	0.0415296		0.533487	-0.00441	0.0251254		0.533291	-0.174653	0.0594783
0.534246	-0.035051	0.0507684		0.534004	-0.272224	0.041536		0.534319	-0.00414	0.0251451		0.534123	-0.173881	0.0595315
0.535078	-0.034354	0.050824		0.534836	-0.272209	0.0415369		0.535151	-0.002797	0.0252433		0.534955	-0.173486	0.0595587
0.53591	-0.034085	0.0508455		0.535667	-0.272609	0.0415113		0.535984	-0.003485	0.025193		0.535787	-0.174039	0.0595206
0.536742	-0.035359	0.0507438		0.536499	-0.273327	0.0414654		0.536816	-0.005373	0.0250549		0.536619	-0.174515	0.0594878
0.537574	-0.036758	0.0506321		0.537331	-0.273346	0.0414641		0.537648	-0.004748	0.0251006		0.537451	-0.174168	0.0595117
0.538406	-0.037465	0.0505757		0.538163	-0.27285	0.0414959		0.53848	-0.005046	0.0250788		0.538283	-0.173765	0.0595395
0.539238	-0.037821	0.0505473		0.538995	-0.272656	0.0415083		0.539313	-0.005465	0.0250482		0.539115	-0.173819	0.0595357
0.540071	-0.037347	0.0505851		0.539826	-0.273039	0.0414838		0.540145	-0.006897	0.0249434		0.539947	-0.172667	0.0596151
0.540903	-0.037213	0.0505958		0.540658	-0.274251	0.0414062		0.540977	-0.007676	0.0248864		0.540779	-0.172235	0.0596449
0.541735	-0.03734	0.0505857		0.54149	-0.273917	0.0414276		0.541809	-0.008809	0.0248036		0.54161	-0.171599	0.0596887
0.542567	-0.037228	0.0505946		0.542322	-0.274126	0.0414142		0.542642	-0.006869	0.0249455		0.542443	-0.170547	0.0597612
0.543399	-0.037912	0.05054		0.543154	-0.274143	0.0414131		0.543474	-0.005983	0.0250103		0.543274	-0.169844	0.0598096
0.544231	-0.038892	0.0504618		0.543985	-0.274221	0.0414081		0.544306	-0.005084	0.025076		0.544106	-0.169481	0.0598347
0.545064	-0.03979	0.0503901		0.544817	-0.275018	0.0413571		0.545139	-0.00601	0.0250083		0.544938	-0.16877	0.0598836
0.545896	-0.040403	0.0503412		0.545649	-0.276103	0.0412876		0.545971	-0.006505	0.0249721		0.54577	-0.168045	0.0599336
0.546728	-0.040501	0.0503333		0.546481	-0.27766	0.0411879		0.546803	-0.006636	0.0249625		0.546602	-0.167128	0.0599968
0.54756	-0.039911	0.0503804		0.547312	-0.278315	0.041146		0.547635	-0.007124	0.0249268		0.547434	-0.166173	0.0600626
0.548392	-0.039399	0.0504213		0.548144	-0.278425	0.0411389		0.548468	-0.006189	0.0249952		0.548266	-0.1665	0.0600401
0.549224	-0.039328	0.050427		0.548976	-0.277934	0.0411704		0.5493	-0.005179	0.0250691		0.549098	-0.16671	0.0600256
0.550057	-0.039882	0.0503827		0.549808	-0.27804	0.0411636		0.550132	-0.005476	0.0250474		0.54993	-0.166037	0.060072
0.550889	-0.040338	0.0503463		0.55064	-0.278128	0.041158		0.550964	-0.005883	0.0250176		0.550762	-0.165525	0.0601072
0.551721	-0.041017	0.0502921		0.551471	-0.278097	0.0411599		0.551797	-0.006302	0.0249869		0.551594	-0.16501	0.0601427
0.552553	-0.04102	0.0502919		0.552303	-0.278152	0.0411564		0.552629	-0.006313	0.0249861		0.552426	-0.164394	0.0601852
0.553385	-0.041186	0.0502787		0.553135	-0.279188	0.0410901		0.553461	-0.006633	0.0249627		0.553258	-0.164619	0.0601697
0.554217	-0.042493	0.0501743		0.553967	-0.280245	0.0410224		0.554294	-0.007016	0.0249347		0.55409	-0.16471	0.0601634
0.555049	-0.0429	0.0501418		0.554798	-0.282111	0.0409029		0.555126	-0.007576	0.0248938		0.554922	-0.165496	0.0601092
0.555882	-0.0437	0.050078		0.55563	-0.282858	0.0408551		0.555958	-0.008508	0.0248256		0.555754	-0.166313	0.0600529
0.556714	-0.043803	0.0500697		0.556462	-0.282761	0.0408613		0.55679	-0.008928	0.0247949		0.556586	-0.16633	0.0600518
0.557546	-0.042932	0.0501393		0.557294	-0.282695	0.0408655		0.557623	-0.007488	0.0249002		0.557418	-0.165265	0.0601252
0.558378	-0.041704	0.0502373		0.558126	-0.284103	0.0407754		0.558455	-0.008224	0.0248464		0.55825	-0.16501	0.0601427
0.55921	-0.041893	0.0502222		0.558957	-0.2853	0.0406987		0.559287	-0.007335	0.0249114		0.559082	-0.166168	0.0600629
0.560042	-0.04265	0.0501618		0.559789	-0.285085	0.0407125		0.560119	-0.006918	0.0249419		0.559914	-0.166417	0.0600458
0.560875	-0.043646	0.0500823		0.560621	-0.284082	0.0407767		0.560952	-0.006631	0.0249629		0.560746	-0.167105	0.0599984
0.561707	-0.044332	0.0500275		0.561453	-0.282887	0.0408532		0.561784	-0.005764	0.0250263		0.561578	-0.168125	0.0599281
0.562539	-0.044905	0.0499818		0.562285	-0.282708	0.0408647		0.562616	-0.004714	0.0251031		0.56241	-0.167953	0.0599399
0.563371	-0.045343	0.0499468		0.563116	-0.282054	0.0409066		0.563449	-0.005156	0.0250708		0.563242	-0.168891	0.0598753
0.564203	-0.045703	0.0499181		0.563948	-0.282095	0.040904		0.564281	-0.005816	0.0250225		0.564074	-0.168647	0.0598921
0.565035	-0.045781	0.0499119		0.56478	-0.281695	0.0409296		0.565113	-0.007124	0.0249268		0.564906	-0.168087	0.0599307
0.565868	-0.045654	0.049922		0.565612	-0.281218	0.0409601		0.565945	-0.00522	0.0250661		0.565738	-0.16869	0.0598892
0.5667	-0.045612	0.0499253		0.566443	-0.281504	0.0409418		0.566778	-0.006445	0.0249765		0.56657	-0.169127	0.059859
0.567532	-0.045969	0.0498968		0.567275	-0.282145	0.0409008		0.56761	-0.005474	0.0250475		0.567401	-0.168017	0.0599355
0.568364	-0.046571	0.0498488		0.568107	-0.282557	0.0408744		0.568442	-0.005	0.0250822		0.568233	-0.168615	0.0598943
0.569196	-0.04731	0.0497898		0.568939	-0.282158	0.0408999		0.569274	-0.005778	0.0250253		0.569065	-0.169726	0.0598178
0.570028	-0.048705	0.0496784		0.569771	-0.281843	0.0409201		0.570107	-0.005319	0.0250589		0.569897	-0.169512	0.0598325
0.570861	-0.048767	0.0496735		0.570602	-0.281969	0.040912		0.570939	-0.004365	0.0251286		0.570729	-0.170698	0.0597508
0.571693	-0.048106	0.0497263		0.571434	-0.282793	0.0408593		0.571771	-0.003292	0.0252071		0.571561	-0.170655	0.0597538
0.572525	-0.046993	0.0498151		0.572266	-0.282911	0.0408517		0.572604	-0.002049	0.0252981		0.572393	-0.170183	0.0597863
0.573357	-0.046549	0.0498505		0.573098	-0.282585	0.0408726		0.573436	-0.002437	0.0252697		0.573225	-0.170431	0.0597692
0.574189	-0.046722	0.0498367		0.573929	-0.282613	0.0408708		0.574268	-0.000527	0.0254094		0.574057	-0.170301	0.0597781
0.575021	-0.046186	0.0498795		0.574761	-0.282321	0.0408895		0.5751	-0.001437	0.0253428		0.574889	-0.170223	0.0597835
0.575853	-0.045447	0.0499385		0.575593	-0.281534	0.0409399		0.575933	-0.000354	0.025422		0.575721	-0.170462	0.0597671
0.576686	-0.045035	0.0499714		0.576425	-0.281586	0.0409365		0.576765	0.00064	0.0254948		0.576553	-0.170463	0.059767
0.577518	-0.044735	0.0499954		0.577257	-0.281491	0.0409426		0.577597	-0.000477	0.0254131		0.577385	-0.170505	0.0597641
0.57835	-0.044972	0.0499764		0.578088	-0.281058	0.0409704		0.578429	-0.000858	0.0253852		0.578217	-0.170941	0.059734
0.579182	-0.046271	0.0498727		0.57892	-0.280487	0.0410069		0.579262	-5.8e-05	0.0254437		0.579049	-0.170808	0.0597432
0.580014	-0.04669	0.0498393		0.579752	-0.280511	0.0410054		0.580094	-1.8e-05	0.0254466		0.579881	-0.169512	0.0598325
0.580846	-0.046397	0.0498627		0.580584	-0.281055	0.0409705		0.580926	0.000417	0.0254784		0.580713	-0.168732	0.0598863
0.581679	-0.046654	0.0498422		0.581415	-0.281321	0.0409535		0.581759	0.000815	0.0255076		0.581545	-0.168153	0.0599262
0.582511	-0.046858	0.0498259		0.582247	-0.282097	0.0409038		0.582591	0.000807	0.025507		0.582377	-0.168327	0.0599142
0.583343	-0.046624	0.0498446		0.583079	-0.28234	0.0408883		0.583423	-0.000258	0.0254291		0.583209	-0.168315	0.059915
0.584175	-0.046969	0.049817		0.583911	-0.283185	0.0408342		0.584255	0.001338	0.0255458		0.584041	-0.167544	0.0599681
0.585007	-0.047552	0.0497705		0.584743	-0.284699	0.0407372		0.585088	-1.1e-05	0.0254471		0.584873	-0.168089	0.0599306
0.585839	-0.047364	0.0497855		0.585574	-0.28557	0.0406815		0.58592	0.000364	0.0254746		0.585705	-0.167889	0.0599444
0.586671	-0.047425	0.0497806		0.586406	-0.286691	0.0406097		0.586752	0.000651	0.0254956		0.586537	-0.167134	0.0599964
0.587504	-0.047973	0.0497369		0.587238	-0.286904	0.040596		0.587584	0.001562	0.0255622		0.587369	-0.167489	0.0599719
0.588336	-0.049208	0.0496383		0.58807	-0.285455	0.0406888		0.588417	0.00089	0.025513		0.588201	-0.168052	0.0599331
0.589168	-0.050016	0.0495738		0.588902	-0.285441	0.0406897		0.589249	0.000765	0.0255039		0.589033	-0.168087	0.0599307
0.59	-0.050029	0.0495727		0.589733	-0.287379	0.0405656		0.590081	0.001146	0.0255318		0.589865	-0.16823	0.0599209
0.590832	-0.049627	0.0496048		0.590565	-0.288434	0.0404981		0.590914	0.001096	0.0255281		0.590697	-0.168952	0.0598711
0.591664	-0.050533	0.0495325		0.591397	-0.288813	0.0404738		0.591746	7e-05	0.0254531		0.591529	-0.168934	0.0598723
0.592497	-0.052004	0.0494151		0.592229	-0.287776	0.0405402		0.592578	-0.000155	0.0254366		0.59236	-0.169275	0.0598488
0.593329	-0.05289	0.0493444		0.59306	-0.286785	0.0406037		0.59341	-0.00081	0.0253887		0.593192	-0.169805	0.0598123
0.594161	-0.053728	0.0492775		0.593892	-0.286971	0.0405918		0.594243	-0.00011	0.0254399		0.594024	-0.169707	0.0598191
0.594993	-0.054478	0.0492176		0.594724	-0.287154	0.04058		0.595075	-0.001062	0.0253703		0.594856	-0.169789	0.0598134
0.595825	-0.055962	0.0490991		0.595556	-0.28731	0.04057		0.595907	-0.000778	0.025391		0.595688	-0.17017	0.0597872
0.596657	-0.057083	0.0490097		0.596388	-0.287375	0.0405659		0.596739	-0.000273	0.025428		0.59652	-0.170927	0.059735
0.59749	-0.057126	0.0490062		0.597219	-0.287527	0.0405562		0.597572	-0.000715	0.0253956		0.597352	-0.172398	0.0596337
0.598322	-0.057791	0.0489531		0.598051	-0.288619	0.0404862		0.598404	0.000493	0.025484		0.598184	-0.173554	0.059554
0.599154	-0.058313	0.0489115		0.598883	-0.290262	0.040381		0.599236	0.001127	0.0255304		0.599016	-0.17441	0.059495
0.599986	-0.058673	0.0488827		0.599715	-0.29082	0.0403453		0.600069	0.001334	0.0255455		0.599848	-0.174795	0.0594685
0.600818	-0.060114	0.0487677		0.600546	-0.291465	0.040304		0.600901	0.000453	0.0254811		0.60068	-0.175878	0.0593939
0.60165	-0.060247	0.0487571		0.601378	-0.29206	0.0402659		0.601733	0.000171	0.0254605		0.601512	-0.177135	0.0593072
0.602482	-0.060077	0.0487706		0.60221	-0.293346	0.0401836		0.602565	0.00031	0.0254706		0.602344	-0.178306	0.0592266
0.603315	-0.060845	0.0487093		0.603042	-0.295409	0.0400515		0.603398	-0.000361	0.0254215		0.603176	-0.179298	0.0591582
0.604147	-0.062089	0.04861		0.603874	-0.295998	0.0400138		0.60423	6.5e-05	0.0254527		0.604008	-0.179841	0.0591208
0.604979	-0.06271	0.0485605		0.604705	-0.296241	0.0399982		0.605062	-0.000819	0.025388		0.60484	-0.180584	0.0590696
0.605811	-0.062626	0.0485672		0.605537	-0.295946	0.0400171		0.605894	-0.000995	0.0253752		0.605672	-0.181982	0.0589733
0.606643	-0.063175	0.0485233		0.606369	-0.296194	0.0400012		0.606727	-0.00089	0.0253828		0.606504	-0.183192	0.0588899
0.607475	-0.063444	0.0485019		0.607201	-0.295686	0.0400337		0.607559	-0.001916	0.0253078		0.607336	-0.184148	0.058824
0.608308	-0.062915	0.0485441		0.608033	-0.295802	0.0400263		0.608391	-0.00207	0.0252965		0.608168	-0.183862	0.0588437
0.60914	-0.062686	0.0485624		0.608864	-0.296943	0.0399533		0.609224	-0.001325	0.025351		0.609	-0.183549	0.0588653
0.609972	-0.063554	0.0484931		0.609696	-0.297033	0.0399475		0.610056	-0.001466	0.0253407		0.609832	-0.183356	0.0588786
0.610804	-0.064971	0.04838		0.610528	-0.297558	0.0399139		0.610888	-0.001658	0.0253267		0.610664	-0.182332	0.0589491
0.611636	-0.065876	0.0483077		0.61136	-0.297735	0.0399026		0.61172	-0.001269	0.0253551		0.611496	-0.181491	0.0590071
0.612468	-0.06505	0.0483737		0.612191	-0.298095	0.0398795		0.612553	8e-05	0.0254538		0.612328	-0.181052	0.0590373
0.613301	-0.064531	0.0484151		0.613023	-0.298447	0.039857		0.613385	-0.000506	0.0254109		0.61316	-0.18017	0.0590981
0.614133	-0.065665	0.0483246		0.613855	-0.299109	0.0398146		0.614217	0.000126	0.0254572		0.613992	-0.179064	0.0591743
0.614965	-0.066006	0.0482974		0.614687	-0.300165	0.039747		0.615049	-0.001146	0.0253641		0.614824	-0.179067	0.0591741
0.615797	-0.06605	0.0482938		0.615519	-0.300918	0.0396987		0.615882	-0.002083	0.0252956		0.615656	-0.178732	0.0591972
0.616629	-0.066048	0.048294		0.61635	-0.301681	0.0396499		0.616714	-0.00275	0.0252468		0.616488	-0.179681	0.0591318
0.617461	-0.066726	0.0482399		0.617182	-0.302741	0.039582		0.617546	-0.003746	0.0251739		0.61732	-0.179615	0.0591364
0.618294	-0.067884	0.0481474		0.618014	-0.304113	0.0394942		0.618379	-0.002948	0.0252323		0.618151	-0.178771	0.0591945
0.619126	-0.06901	0.0480576		0.618846	-0.303893	0.0395083		0.619211	-0.002807	0.0252426		0.618983	-0.178327	0.0592251
0.619958	-0.069895	0.0479869		0.619677	-0.302829	0.0395764		0.620043	-0.003098	0.0252213		0.619815	-0.178035	0.0592452
0.62079	-0.069079	0.0480521		0.620509	-0.302835	0.039576		0.620875	-0.003516	0.0251907		0.620647	-0.177716	0.0592672
0.621622	-0.067462	0.0481811		0.621341	-0.301776	0.0396438		0.621708	-0.002262	0.0252825		0.621479	-0.177122	0.0593081
0.622454	-0.067899	0.0481462		0.622173	-0.301255	0.0396772		0.62254	-0.001558	0.025334		0.622311	-0.175914	0.0593914
0.623286	-0.068984	0.0480596		0.623005	-0.300422	0.0397305		0.623372	-0.002139	0.0252915		0.623143	-0.175388	0.0594276
0.624119	-0.069233	0.0480398		0.623836	-0.298149	0.039876		0.624204	-0.002104	0.025294		0.623975	-0.174868	0.0594635
0.624951	-0.069743	0.047999		0.624668	-0.298116	0.0398782		0.625037	-0.001867	0.0253114		0.624807	-0.174544	0.0594858
0.625783	-0.069847	0.0479907		0.6255	-0.297507	0.0399171		0.625869	-0.002231	0.0252847		0.625639	-0.174162	0.0595121
0.626615	-0.070387	0.0479476		0.626332	-0.297508	0.0399171		0.626701	-0.001562	0.0253337		0.626471	-0.173084	0.0595864
0.627447	-0.07217	0.0478053		0.627163	-0.297944	0.0398892		0.627533	-0.002183	0.0252883		0.627303	-0.171944	0.0596649
0.628279	-0.073143	0.0477276		0.627995	-0.298493	0.039854		0.628366	-0.002288	0.0252806		0.628135	-0.17159	0.0596893
0.629112	-0.073445	0.0477035		0.628827	-0.299182	0.0398099		0.629198	-0.002275	0.0252815		0.628967	-0.1716	0.0596886
0.629944	-0.073546	0.0476955		0.629659	-0.300199	0.0397448		0.63003	-0.002363	0.0252751		0.629799	-0.172107	0.0596537
0.630776	-0.072927	0.0477449		0.630491	-0.300829	0.0397044		0.630863	-0.002805	0.0252428		0.630631	-0.172834	0.0596036
0.631608	-0.071811	0.047834		0.631322	-0.300607	0.0397187		0.631695	-0.004223	0.025139		0.631463	-0.173777	0.0595386
0.63244	-0.071334	0.047872		0.632154	-0.301616	0.0396541		0.632527	-0.004055	0.0251513		0.632295	-0.173668	0.0595461
0.633272	-0.073234	0.0477204		0.632986	-0.301866	0.0396381		0.633359	-0.005689	0.0250318		0.633127	-0.173443	0.0595616
0.634104	-0.075435	0.0475447		0.633818	-0.302477	0.0395989		0.634192	-0.00576	0.0250266		0.633959	-0.17404	0.0595205
0.634937	-0.07581	0.0475147		0.63465	-0.3038	0.0395142		0.635024	-0.00663	0.024963		0.634791	-0.175102	0.0594473
0.635769	-0.075972	0.0475018		0.635481	-0.304309	0.0394816		0.635856	-0.005141	0.0250719		0.635623	-0.17474	0.0594723
0.636601	-0.077832	0.0473533		0.636313	-0.304127	0.0394933		0.636689	-0.004222	0.0251391		0.636455	-0.174897	0.0594615
0.637433	-0.079286	0.0472373		0.637145	-0.304415	0.0394748		0.637521	-0.004689	0.0251049		0.637287	-0.173698	0.0595441
0.638265	-0.07993	0.0471859		0.637977	-0.304367	0.0394779		0.638353	-0.005205	0.0250672		0.638119	-0.173056	0.0595883
0.639097	-0.080996	0.0471008		0.638808	-0.304149	0.0394919		0.639185	-0.00627	0.0249893		0.638951	-0.172112	0.0596534
0.63993	-0.082373	0.0469908		0.63964	-0.305183	0.0394257		0.640018	-0.006794	0.024951		0.639783	-0.171647	0.0596854
0.640762	-0.084021	0.0468593		0.640472	-0.305999	0.0393734		0.64085	-0.006644	0.0249619		0.640615	-0.171298	0.0597094
0.641594	-0.085867	0.0467119		0.641304	-0.305693	0.039393		0.641682	-0.006706	0.0249574		0.641447	-0.172061	0.0596569
0.642426	-0.088014	0.0465405		0.642136	-0.307066	0.0393051		0.642514	-0.008439	0.0248306		0.642278	-0.172168	0.0596495
0.643258	-0.089621	0.0464123		0.642967	-0.309262	0.0391645		0.643347	-0.010181	0.0247032		0.64311	-0.171819	0.0596735
0.64409	-0.089494	0.0464224		0.643799	-0.309806	0.0391297		0.644179	-0.009981	0.0247178		0.643942	-0.170849	0.0597404
0.644923	-0.089676	0.0464079		0.644631	-0.312422	0.0389622		0.645011	-0.010528	0.0246778		0.644774	-0.169562	0.0598291
0.645755	-0.090987	0.0463032		0.645463	-0.311795	0.0390023		0.645844	-0.010545	0.0246766		0.645606	-0.170135	0.0597896
0.646587	-0.092738	0.0461634		0.646294	-0.313314	0.0389051		0.646676	-0.01013	0.0247069		0.646438	-0.170623	0.059756
0.647419	-0.093129	0.0461322		0.647126	-0.313927	0.0388658		0.647508	-0.0099	0.0247238		0.64727	-0.170268	0.0597804
0.648251	-0.092984	0.0461438		0.647958	-0.314422	0.0388341		0.64834	-0.009583	0.0247469		0.648102	-0.169793	0.0598132
0.649083	-0.0953	0.0459589		0.64879	-0.314976	0.0387986		0.649173	-0.009466	0.0247555		0.648934	-0.168501	0.0599022
0.649916	-0.098171	0.0457297		0.649622	-0.315777	0.0387474		0.650005	-0.010237	0.0246991		0.649766	-0.167281	0.0599862
0.650748	-0.100354	0.0455555		0.650453	-0.314762	0.0388123		0.650837	-0.010532	0.0246775		0.650598	-0.167104	0.0599984
0.65158	-0.102125	0.0454141		0.651285	-0.313717	0.0388793		0.651669	-0.010668	0.0246676		0.65143	-0.165918	0.0600802
0.652412	-0.104244	0.0452449		0.652117	-0.31404	0.0388586		0.652502	-0.010059	0.0247121		0.652262	-0.16502	0.060142
0.653244	-0.105253	0.0451644		0.652949	-0.314872	0.0388053		0.653334	-0.010154	0.0247052		0.653094	-0.165406	0.0601154
0.654076	-0.104903	0.0451923		0.653781	-0.315475	0.0387667		0.654166	-0.009195	0.0247753		0.653926	-0.165746	0.060092
0.654908	-0.105424	0.0451508		0.654612	-0.315894	0.0387399		0.654999	-0.008993	0.0247901		0.654758	-0.165765	0.0600907
0.655741	-0.107009	0.0450242		0.655444	-0.316015	0.0387321		0.655831	-0.009714	0.0247374		0.65559	-0.165716	0.0600941
0.656573	-0.107916	0.0449518		0.656276	-0.31571	0.0387516		0.656663	-0.009734	0.0247359		0.656422	-0.165116	0.0601354
0.657405	-0.10766	0.0449723		0.657108	-0.315964	0.0387354		0.657495	-0.009835	0.0247285		0.657254	-0.164193	0.060199
0.658237	-0.107424	0.0449911		0.657939	-0.315803	0.0387457		0.658328	-0.009017	0.0247883		0.658086	-0.164022	0.0602108
0.659069	-0.108239	0.044926		0.658771	-0.318201	0.0385921		0.65916	-0.008941	0.0247939		0.658918	-0.163074	0.0602761
0.659901	-0.10876	0.0448844		0.659603	-0.317474	0.0386387		0.659992	-0.008573	0.0248208		0.65975	-0.163248	0.0602641
0.660734	-0.108471	0.0449075		0.660435	-0.316462	0.0387035		0.660824	-0.008198	0.0248483		0.660582	-0.163758	0.060229
0.661566	-0.108256	0.0449247		0.661267	-0.316494	0.0387014		0.661657	-0.009291	0.0247683		0.661414	-0.163478	0.0602483
0.662398	-0.108152	0.044933		0.662098	-0.316905	0.0386751		0.662489	-0.009593	0.0247462		0.662246	-0.163163	0.06027
0.66323	-0.107982	0.0449466		0.66293	-0.316643	0.0386919		0.663321	-0.00799	0.0248635		0.663078	-0.162818	0.0602938
0.664062	-0.108159	0.0449324		0.663762	-0.31797	0.0386069		0.664154	-0.006911	0.0249424		0.66391	-0.163749	0.0602296
0.664894	-0.108904	0.044873		0.664594	-0.31892	0.0385461		0.664986	-0.007877	0.0248717		0.664742	-0.164306	0.0601912
0.665727	-0.10915	0.0448533		0.665425	-0.319283	0.0385229		0.665818	-0.008778	0.0248058		0.665574	-0.16564	0.0600993
0.666559	-0.109059	0.0448606		0.666257	-0.320644	0.0384357		0.66665	-0.010297	0.0246947		0.666406	-0.164869	0.0601524
0.667391	-0.108967	0.0448679		0.667089	-0.321619	0.0383733		0.667483	-0.011588	0.0246003		0.667238	-0.163672	0.0602349
0.668223	-0.110386	0.0447547		0.667921	-0.322595	0.0383108		0.668315	-0.011702	0.0245919		0.668069	-0.165097	0.0601367
0.669055	-0.110973	0.0447078		0.668753	-0.322628	0.0383087		0.669147	-0.01091	0.0246499		0.668901	-0.166216	0.0600596
0.669887	-0.109768	0.044804		0.669584	-0.32214	0.0383399		0.669979	-0.009803	0.0247309		0.669733	-0.168089	0.0599306
0.670719	-0.109015	0.0448641		0.670416	-0.320917	0.0384182		0.670812	-0.008747	0.0248081		0.670565	-0.170241	0.0597823
0.671552	-0.109491	0.0448261		0.671248	-0.322658	0.0383068		0.671644	-0.008851	0.0248005		0.671397	-0.169943	0.0598028
0.672384	-0.109931	0.044791		0.67208	-0.324738	0.0381736		0.672476	-0.008468	0.0248285		0.672229	-0.169646	0.0598233
0.673216	-0.10986	0.0447966		0.672912	-0.325838	0.0381032		0.673308	-0.008483	0.0248274		0.673061	-0.169877	0.0598074
0.674048	-0.110598	0.0447377		0.673743	-0.325878	0.0381006		0.674141	-0.008663	0.0248142		0.673893	-0.170845	0.0597407
0.67488	-0.11102	0.044704		0.674575	-0.326036	0.0380905		0.674973	-0.009332	0.0247653		0.674725	-0.170195	0.0597855
0.675712	-0.111168	0.0446922		0.675407	-0.327036	0.0380265		0.675805	-0.009398	0.0247605		0.675557	-0.170901	0.0597368
0.676545	-0.111328	0.0446795		0.676239	-0.328381	0.0379403		0.676638	-0.008921	0.0247954		0.676389	-0.171271	0.0597113
0.677377	-0.112326	0.0445998		0.67707	-0.329476	0.0378702		0.67747	-0.009319	0.0247663		0.677221	-0.172877	0.0596006
0.678209	-0.113416	0.0445128		0.677902	-0.330022	0.0378353		0.678302	-0.00967	0.0247406		0.678053	-0.175297	0.0594339
0.679041	-0.114153	0.0444539		0.678734	-0.3299	0.0378431		0.679134	-0.009589	0.0247465		0.678885	-0.175536	0.0594174
0.679873	-0.114869	0.0443968		0.679566	-0.328156	0.0379547		0.679967	-0.00894	0.024794		0.679717	-0.175588	0.0594138
0.680705	-0.115418	0.044353		0.680398	-0.328439	0.0379366		0.680799	-0.009945	0.0247205		0.680549	-0.176536	0.0593485
0.681538	-0.116956	0.0442302		0.681229	-0.32887	0.037909		0.681631	-0.009918	0.0247224		0.681381	-0.177148	0.0593063
0.68237	-0.118341	0.0441196		0.682061	-0.329849	0.0378463		0.682464	-0.00931	0.0247669		0.682213	-0.178675	0.0592011
0.683202	-0.119552	0.044023		0.682893	-0.331514	0.0377397		0.683296	-0.009626	0.0247438		0.683045	-0.179079	0.0591733
0.684034	-0.120272	0.0439655		0.683725	-0.331572	0.037736		0.684128	-0.009482	0.0247543		0.683877	-0.179487	0.0591452
0.684866	-0.120212	0.0439703		0.684556	-0.330753	0.0377885		0.68496	-0.010597	0.0246728		0.684709	-0.180109	0.0591023
0.685698	-0.120917	0.043914		0.685388	-0.32934	0.0378789		0.685793	-0.010403	0.024687		0.685541	-0.179873	0.0591186
0.68653	-0.121829	0.0438412		0.68622	-0.328551	0.0379295		0.686625	-0.008715	0.0248104		0.686373	-0.179704	0.0591302
0.687363	-0.122227	0.0438094		0.687052	-0.328155	0.0379548		0.687457	-0.007626	0.0248901		0.687205	-0.180352	0.0590856
0.688195	-0.122249	0.0438077		0.687884	-0.32797	0.0379667		0.688289	-0.008204	0.0248478		0.688037	-0.180825	0.059053
0.689027	-0.123121	0.0437381		0.688715	-0.327974	0.0379664		0.689122	-0.009509	0.0247524		0.688869	-0.180431	0.0590801
0.689859	-0.123595	0.0437002		0.689547	-0.3287	0.0379199		0.689954	-0.011494	0.0246072		0.689701	-0.179645	0.0591343
0.690691	-0.124305	0.0436435		0.690379	-0.328376	0.0379407		0.690786	-0.012065	0.0245654		0.690533	-0.179205	0.0591646
0.691523	-0.12472	0.0436104		0.691211	-0.330219	0.0378227		0.691619	-0.011816	0.0245836		0.691365	-0.178706	0.059199
0.692356	-0.125529	0.0435458		0.692042	-0.330334	0.0378153		0.692451	-0.012922	0.0245027		0.692197	-0.179368	0.0591534
0.693188	-0.126958	0.0434318		0.692874	-0.330113	0.0378294		0.693283	-0.013601	0.024453		0.693029	-0.179842	0.0591207
0.69402	-0.128564	0.0433036		0.693706	-0.327721	0.0379826		0.694115	-0.013762	0.0244412		0.69386	-0.180324	0.0590875
0.694852	-0.129961	0.043192		0.694538	-0.327225	0.0380144		0.694948	-0.01419	0.0244099		0.694692	-0.179502	0.0591441
0.695684	-0.131361	0.0430803		0.69537	-0.328082	0.0379595		0.69578	-0.015018	0.0243494		0.695524	-0.180619	0.0590672
0.696516	-0.132514	0.0429882		0.696201	-0.326594	0.0380548		0.696612	-0.015815	0.0242911		0.696356	-0.18012	0.0591016
0.697349	-0.13332	0.0429239		0.697033	-0.326581	0.0380556		0.697444	-0.016841	0.024216		0.697188	-0.179435	0.0591488
0.698181	-0.134123	0.0428598		0.697865	-0.326411	0.0380665		0.698277	-0.018232	0.0241143		0.69802	-0.178495	0.0592135
0.699013	-0.134515	0.0428285		0.698697	-0.32649	0.0380614		0.699109	-0.019483	0.0240228		0.698852	-0.176688	0.059338
0.699845	-0.136083	0.0427033		0.699529	-0.326996	0.038029		0.699941	-0.020422	0.0239541		0.699684	-0.177244	0.0592997
0.700677	-0.137322	0.0426044		0.70036	-0.326769	0.0380436		0.700774	-0.021061	0.0239073		0.700516	-0.178926	0.0591838
0.701509	-0.137909	0.0425576		0.701192	-0.327238	0.0380135		0.701606	-0.021034	0.0239093		0.701348	-0.178872	0.0591876
0.702341	-0.137912	0.0425573		0.702024	-0.328406	0.0379387		0.702438	-0.022138	0.0238285		0.70218	-0.178231	0.0592317
0.703174	-0.138041	0.042547		0.702856	-0.328258	0.0379482		0.70327	-0.022541	0.0237991		0.703012	-0.177582	0.0592764
0.704006	-0.13977	0.042409		0.703687	-0.326697	0.0380482		0.704103	-0.022766	0.0237826		0.703844	-0.178328	0.059225
0.704838	-0.141624	0.042261		0.704519	-0.326946	0.0380322		0.704935	-0.024217	0.0236765		0.704676	-0.178688	0.0592002
0.70567	-0.143108	0.0421426		0.705351	-0.326716	0.0380469		0.705767	-0.024133	0.0236826		0.705508	-0.178638	0.0592037
0.706502	-0.143866	0.0420821		0.706183	-0.328081	0.0379595		0.706599	-0.02336	0.0237391		0.70634	-0.179759	0.0591264
0.707334	-0.145468	0.0419542		0.707015	-0.328342	0.0379428		0.707432	-0.024854	0.0236299		0.707172	-0.179806	0.0591232
0.708167	-0.147376	0.0418019		0.707846	-0.328761	0.037916		0.708264	-0.025629	0.0235732		0.708004	-0.179798	0.0591237
0.708999	-0.1486	0.0417042		0.708678	-0.328694	0.0379203		0.709096	-0.024929	0.0236244		0.708836	-0.180038	0.0591072
0.709831	-0.148695	0.0416966		0.70951	-0.328429	0.0379373		0.709929	-0.024051	0.0236886		0.709668	-0.180214	0.0590951
0.710663	-0.148149	0.0417402		0.710342	-0.32702	0.0380275		0.710761	-0.022782	0.0237814		0.7105	-0.181082	0.0590353
0.711495	-0.148452	0.041716		0.711173	-0.328066	0.0379605		0.711593	-0.02261	0.023794		0.711332	-0.181993	0.0589725
0.712327	-0.149384	0.0416416		0.712005	-0.328093	0.0379588		0.712425	-0.023815	0.0237059		0.712164	-0.182189	0.058959
0.71316	-0.150147	0.0415807		0.712837	-0.326675	0.0380496		0.713258	-0.02349	0.0237296		0.712996	-0.182512	0.0589367
0.713992	-0.150293	0.041569		0.713669	-0.327847	0.0379745		0.71409	-0.022499	0.0238021		0.713828	-0.183331	0.0588803
0.714824	-0.150177	0.0415783		0.714501	-0.33036	0.0378136		0.714922	-0.022277	0.0238184		0.71466	-0.184002	0.0588341
0.715656	-0.149292	0.0416489		0.715332	-0.32929	0.0378821		0.715754	-0.022198	0.0238242		0.715492	-0.184582	0.0587941
0.716488	-0.148862	0.0416832		0.716164	-0.328975	0.0379023		0.716587	-0.022126	0.0238294		0.716324	-0.184654	0.0587891
0.71732	-0.148864	0.0416831		0.716996	-0.329832	0.0378474		0.717419	-0.022842	0.023777		0.717156	-0.184069	0.0588294
0.718152	-0.148358	0.0417235		0.717828	-0.327316	0.0380085		0.718251	-0.022801	0.02378		0.717988	-0.184477	0.0588013
0.718985	-0.148412	0.0417192		0.71866	-0.328192	0.0379524		0.719083	-0.021494	0.0238756		0.718819	-0.185687	0.058718
0.719817	-0.14867	0.0416986		0.719491	-0.328939	0.0379046		0.719916	-0.020523	0.0239467		0.719651	-0.187759	0.0585752
0.720649	-0.147919	0.0417585		0.720323	-0.329241	0.0378853		0.720748	-0.021133	0.0239021		0.720483	-0.187965	0.058561
0.721481	-0.147962	0.0417551		0.721155	-0.330101	0.0378302		0.72158	-0.022607	0.0237942		0.721315	-0.186573	0.0586569
0.722313	-0.148764	0.0416911		0.721987	-0.330061	0.0378328		0.722413	-0.022972	0.0237675		0.722147	-0.187151	0.0586171
0.723145	-0.149036	0.0416694		0.722818	-0.328492	0.0379332		0.723245	-0.023225	0.023749		0.722979	-0.187152	0.058617
0.723978	-0.148641	0.0417009		0.72365	-0.329287	0.0378823		0.724077	-0.023712	0.0237134		0.723811	-0.187334	0.0586045
0.72481	-0.147621	0.0417823		0.724482	-0.328948	0.037904		0.724909	-0.024122	0.0236834		0.724643	-0.185596	0.0587242
0.725642	-0.14761	0.0417832		0.725314	-0.328704	0.0379197		0.725742	-0.024488	0.0236566		0.725475	-0.185381	0.058739
0.726474	-0.148257	0.0417315		0.726146	-0.32865	0.0379231		0.726574	-0.025853	0.0235568		0.726307	-0.185288	0.0587454
0.727306	-0.148813	0.0416872		0.726977	-0.328743	0.0379172		0.727406	-0.027019	0.0234715		0.727139	-0.185009	0.0587647
0.728138	-0.147855	0.0417636		0.727809	-0.330137	0.0378279		0.728239	-0.026976	0.0234746		0.727971	-0.185043	0.0587623
0.728971	-0.147258	0.0418113		0.728641	-0.33133	0.0377515		0.729071	-0.027856	0.0234103		0.728803	-0.184718	0.0587847
0.729803	-0.147708	0.0417754		0.729473	-0.331128	0.0377645		0.729903	-0.02889	0.0233346		0.729635	-0.185285	0.0587457
0.730635	-0.148356	0.0417236		0.730304	-0.330408	0.0378106		0.730735	-0.028874	0.0233358		0.730467	-0.185285	0.0587457
0.731467	-0.149642	0.041621		0.731136	-0.331284	0.0377545		0.731568	-0.028879	0.0233354		0.731299	-0.185638	0.0587213
0.732299	-0.149803	0.0416081		0.731968	-0.331109	0.0377657		0.7324	-0.029673	0.0232774		0.732131	-0.185601	0.0587239
0.733131	-0.1499	0.0416004		0.7328	-0.331887	0.0377159		0.733232	-0.030332	0.0232291		0.732963	-0.186151	0.058686
0.733963	-0.149037	0.0416693		0.733632	-0.332518	0.0376755		0.734064	-0.030394	0.0232246		0.733795	-0.185865	0.0587057
0.734796	-0.148712	0.0416952		0.734463	-0.331405	0.0377467		0.734897	-0.031013	0.0231793		0.734627	-0.186497	0.0586621
0.735628	-0.148815	0.041687		0.735295	-0.330905	0.0377787		0.735729	-0.03157	0.0231386		0.735459	-0.185431	0.0587356
0.73646	-0.150138	0.0415814		0.736127	-0.331457	0.0377434		0.736561	-0.032281	0.0230866		0.736291	-0.185607	0.0587235
0.737292	-0.152078	0.0414265		0.736959	-0.33173	0.0377259		0.737393	-0.033051	0.0230302		0.737123	-0.185087	0.0587593
0.738124	-0.153442	0.0413176		0.73779	-0.331603	0.037734		0.738226	-0.032667	0.0230583		0.737955	-0.186011	0.0586956
0.738956	-0.154462	0.0412362		0.738622	-0.333033	0.0376425		0.739058	-0.033206	0.0230189		0.738787	-0.185709	0.0587164
0.739789	-0.156514	0.0410724		0.739454	-0.332251	0.0376926		0.73989	-0.033295	0.0230124		0.739619	-0.184904	0.0587719
0.740621	-0.15678	0.0410512		0.740286	-0.330993	0.0377731		0.740723	-0.034014	0.0229598		0.740451	-0.184362	0.0588093
0.741453	-0.157634	0.040983		0.741118	-0.330354	0.037814		0.741555	-0.033332	0.0230097		0.741283	-0.184188	0.0588212
0.742285	-0.158823	0.0408881		0.741949	-0.329888	0.0378439		0.742387	-0.032563	0.0230659		0.742115	-0.185016	0.0587642
0.743117	-0.159304	0.0408497		0.742781	-0.329653	0.0378589		0.743219	-0.033481	0.0229988		0.742947	-0.184863	0.0587747
0.743949	-0.160568	0.0407488		0.743613	-0.331187	0.0377607		0.744052	-0.032758	0.0230517		0.743778	-0.185105	0.0587581
0.744782	-0.162056	0.04063		0.744445	-0.33065	0.0377951		0.744884	-0.032792	0.0230492		0.74461	-0.184804	0.0587788
0.745614	-0.162308	0.0406099		0.745277	-0.332256	0.0376922		0.745716	-0.033033	0.0230316		0.745442	-0.185106	0.058758
0.746446	-0.162141	0.0406232		0.746108	-0.333122	0.0376368		0.746548	-0.033088	0.0230275		0.746274	-0.185125	0.0587567
0.747278	-0.162482	0.040596		0.74694	-0.331936	0.0377127		0.747381	-0.032029	0.023105		0.747106	-0.184961	0.058768
0.74811	-0.162764	0.0405735		0.747772	-0.332402	0.0376829		0.748213	-0.030976	0.023182		0.747938	-0.184382	0.0588079
0.748942	-0.163981	0.0404763		0.748604	-0.331057	0.037769		0.749045	-0.030754	0.0231983		0.74877	-0.184147	0.0588241
0.749774	-0.165569	0.0403496		0.749435	-0.329859	0.0378457		0.749878	-0.030201	0.0232387		0.749602	-0.183515	0.0588676
0.750607	-0.165151	0.0403829		0.750267	-0.32975	0.0378527		0.75071	-0.029585	0.0232838		0.750434	-0.182956	0.0589061
0.751439	-0.166295	0.0402916		0.751099	-0.330389	0.0378118		0.751542	-0.029266	0.0233071		0.751266	-0.183041	0.0589003
0.752271	-0.16722	0.0402178		0.751931	-0.331002	0.0377725		0.752374	-0.029763	0.0232708		0.752098	-0.183635	0.0588593
0.753103	-0.167784	0.0401728		0.752763	-0.3314	0.037747		0.753207	-0.029772	0.0232701		0.75293	-0.183383	0.0588767
0.753935	-0.169331	0.0400493		0.753594	-0.330434	0.0378089		0.754039	-0.028359	0.0233735		0.753762	-0.183902	0.058841
0.754767	-0.170407	0.0399634		0.754426	-0.331723	0.0377264		0.754871	-0.028118	0.0233911		0.754594	-0.184275	0.0588152
0.7556	-0.171691	0.0398609		0.755258	-0.33188	0.0377163		0.755704	-0.028707	0.023348		0.755426	-0.183327	0.0588806
0.756432	-0.173538	0.0397134		0.75609	-0.332451	0.0376797		0.756536	-0.028932	0.0233316		0.756258	-0.183703	0.0588547
0.757264	-0.174779	0.0396144		0.756921	-0.333182	0.0376329		0.757368	-0.029103	0.023319		0.75709	-0.18347	0.0588707
0.758096	-0.174589	0.0396295		0.757753	-0.332341	0.0376868		0.7582	-0.028254	0.0233812		0.757922	-0.184517	0.0587986
0.758928	-0.175566	0.0395515		0.758585	-0.331975	0.0377102		0.759033	-0.027869	0.0234093		0.758754	-0.185229	0.0587495
0.75976	-0.176225	0.0394989		0.759417	-0.331553	0.0377372		0.759865	-0.027567	0.0234314		0.759586	-0.186571	0.058657
0.760593	-0.176162	0.039504		0.760249	-0.330906	0.0377787		0.760697	-0.028213	0.0233842		0.760418	-0.186727	0.0586463
0.761425	-0.177624	0.0393873		0.76108	-0.331873	0.0377168		0.761529	-0.029287	0.0233056		0.76125	-0.187337	0.0586043
0.762257	-0.179105	0.039269		0.761912	-0.33266	0.0376664		0.762362	-0.030107	0.0232456		0.762082	-0.188026	0.0585568
0.763089	-0.179593	0.0392301		0.762744	-0.333456	0.0376154		0.763194	-0.030322	0.0232299		0.762914	-0.187658	0.0585821
0.763921	-0.180936	0.0391229		0.763576	-0.333759	0.037596		0.764026	-0.030249	0.0232352		0.763746	-0.187167	0.058616
0.764753	-0.181662	0.0390649		0.764408	-0.333243	0.037629		0.764858	-0.031034	0.0231778		0.764578	-0.187535	0.0585906
0.765585	-0.181496	0.0390782		0.765239	-0.33365	0.037603		0.765691	-0.031328	0.0231563		0.76541	-0.189168	0.0584781
0.766418	-0.182963	0.0389611		0.766071	-0.333658	0.0376025		0.766523	-0.030905	0.0231872		0.766242	-0.190726	0.0583707
0.76725	-0.184581	0.0388319		0.766903	-0.334397	0.0375551		0.767355	-0.030961	0.0231831		0.767074	-0.190899	0.0583588
0.768082	-0.185069	0.038793		0.767735	-0.336352	0.03743		0.768188	-0.032112	0.0230989		0.767906	-0.191324	0.0583295
0.768914	-0.184996	0.0387988		0.768566	-0.335384	0.037492		0.76902	-0.033788	0.0229763		0.768737	-0.191649	0.0583071
0.769746	-0.184897	0.0388067		0.769398	-0.335158	0.0375064		0.769852	-0.03389	0.0229689		0.769569	-0.194197	0.0581316
0.770578	-0.184443	0.0388429		0.77023	-0.336081	0.0374473		0.770684	-0.033647	0.0229867		0.770401	-0.194424	0.0581159
0.771411	-0.185076	0.0387924		0.771062	-0.337132	0.03738		0.771517	-0.034755	0.0229056		0.771233	-0.194615	0.0581028
0.772243	-0.18532	0.0387729		0.771894	-0.337956	0.0373273		0.772349	-0.035995	0.0228149		0.772065	-0.196271	0.0579886
0.773075	-0.185492	0.0387592		0.772725	-0.337918	0.0373297		0.773181	-0.036432	0.0227829		0.772897	-0.196306	0.0579862
0.773907	-0.186073	0.0387128		0.773557	-0.338045	0.0373216		0.774014	-0.03698	0.0227428		0.773729	-0.197369	0.057913
0.774739	-0.1863	0.0386947		0.774389	-0.339071	0.0372559		0.774846	-0.03789	0.0226763		0.774561	-0.197474	0.0579058
0.775571	-0.186903	0.0386466		0.775221	-0.339361	0.0372373		0.775678	-0.038713	0.0226161		0.775393	-0.196586	0.0579669
0.776404	-0.1868	0.0386548		0.776052	-0.33927	0.0372431		0.77651	-0.039128	0.0225857		0.776225	-0.19686	0.0579481
0.777236	-0.186627	0.0386686		0.776884	-0.339011	0.0372597		0.777343	-0.039297	0.0225734		0.777057	-0.196805	0.0579518
0.778068	-0.187141	0.0386276		0.777716	-0.338279	0.0373066		0.778175	-0.039721	0.0225423		0.777889	-0.19648	0.0579742
0.7789	-0.188158	0.0385464		0.778548	-0.339789	0.0372099		0.779007	-0.040838	0.0224606		0.778721	-0.195726	0.0580262
0.779732	-0.188422	0.0385253		0.77938	-0.339601	0.0372219		0.779839	-0.040099	0.0225147		0.779553	-0.195674	0.0580298
0.780564	-0.188981	0.0384807		0.780211	-0.34073	0.0371497		0.780672	-0.039677	0.0225456		0.780385	-0.194529	0.0581087
0.781397	-0.188841	0.0384919		0.781043	-0.341889	0.0370754		0.781504	-0.04	0.0225219		0.781217	-0.195322	0.058054
0.782229	-0.188578	0.0385128		0.781875	-0.342296	0.0370494		0.782336	-0.039035	0.0225925		0.782049	-0.194892	0.0580837
0.783061	-0.189207	0.0384626		0.782707	-0.34335	0.0369819		0.783168	-0.03742	0.0227107		0.782881	-0.195863	0.0580168
0.783893	-0.18943	0.0384448		0.783538	-0.343246	0.0369886		0.784001	-0.037483	0.022706		0.783713	-0.197194	0.057925
0.784725	-0.189274	0.0384573		0.78437	-0.343396	0.036979		0.784833	-0.037881	0.0226769		0.784545	-0.19816	0.0578585
0.785557	-0.189916	0.038406		0.785202	-0.343813	0.0369523		0.785665	-0.037576	0.0226992		0.785377	-0.197518	0.0579027
0.786389	-0.191896	0.038248		0.786034	-0.34398	0.0369416		0.786498	-0.037612	0.0226966		0.786209	-0.196525	0.0579711
0.787222	-0.191173	0.0383057		0.786866	-0.342863	0.0370131		0.78733	-0.037238	0.022724		0.787041	-0.195524	0.0580401
0.788054	-0.190362	0.0383704		0.787697	-0.341632	0.0370919		0.788162	-0.037247	0.0227233		0.787873	-0.195697	0.0580282
0.788886	-0.191476	0.0382815		0.788529	-0.34134	0.0371106		0.788994	-0.037784	0.022684		0.788705	-0.197217	0.0579235
0.789718	-0.193621	0.0381103		0.789361	-0.341548	0.0370973		0.789827	-0.037181	0.0227281		0.789537	-0.198796	0.0578147
0.79055	-0.193088	0.0381528		0.790193	-0.341966	0.0370705		0.790659	-0.037025	0.0227395		0.790369	-0.19781	0.0578826
0.791382	-0.194478	0.0380419		0.791025	-0.342026	0.0370667		0.791491	-0.037137	0.0227314		0.791201	-0.199287	0.0577808
[truncated: 15,873 more rows]
